# Supplementary material
Source: publisher figshare collection journal article supplement (https://acs.figshare.com/ndownloader/files/4836814)
Supplement: Supplementary file 1 [file 4836814]

 
data_shelx
 
_audit_creation_method            SHELXL-2013
_chemical_name_systematic
;
 ?
;
_chemical_name_common             ?
_chemical_melting_point           ?
_chemical_formula_moiety          'C21 H20 N2 O5, 2(H2 O)'
_chemical_formula_sum
 'C21 H24 N2 O7' 
_chemical_formula_weight          416.42

loop_
 _atom_type_symbol
 _atom_type_description
 _atom_type_scat_dispersion_real
 _atom_type_scat_dispersion_imag
 _atom_type_scat_source
 'C'  'C'   0.0033   0.0016
 'International Tables Vol C Tables 4.2.6.8 and 6.1.1.4'
 'H'  'H'   0.0000   0.0000
 'International Tables Vol C Tables 4.2.6.8 and 6.1.1.4'
 'N'  'N'   0.0061   0.0033
 'International Tables Vol C Tables 4.2.6.8 and 6.1.1.4'
 'O'  'O'   0.0106   0.0060
 'International Tables Vol C Tables 4.2.6.8 and 6.1.1.4'
 
_space_group_crystal_system       orthorhombic
_space_group_IT_number            20
_space_group_name_H-M_alt         'C 2 2 21'
_space_group_name_Hall            'C 2c 2'
 
_shelx_space_group_comment
;
The symmetry employed for this shelxl refinement is uniquely defined
by the following loop, which should always be used as a source of
symmetry information in preference to the above space-group names.
They are only intended as comments.
;
 
loop_
 _space_group_symop_operation_xyz
 'x, y, z'
 '-x, -y, z+1/2'
 'x, -y, -z'
 '-x, y, -z+1/2'
 'x+1/2, y+1/2, z'
 '-x+1/2, -y+1/2, z+1/2'
 'x+1/2, -y+1/2, -z'
 '-x+1/2, y+1/2, -z+1/2'
 
_cell_length_a                    8.503(2)
_cell_length_b                    19.136(4)
_cell_length_c                    24.138(5)
_cell_angle_alpha                 90
_cell_angle_beta                  90
_cell_angle_gamma                 90
_cell_volume                      3927.6(15)
_cell_formula_units_Z             8
_cell_measurement_temperature     170(2)
_cell_measurement_reflns_used     41287 
_cell_measurement_theta_min       6.4  
_cell_measurement_theta_max       58.7 
 
_exptl_crystal_description        block 
_exptl_crystal_colour             colourless 
_exptl_crystal_density_meas       ? 
_exptl_crystal_density_method     ?              
_exptl_crystal_density_diffrn     1.408          
_exptl_crystal_F_000              1760
_exptl_transmission_factor_min    ?                                             
_exptl_transmission_factor_max    ?                                             
_exptl_crystal_size_max           0.466
_exptl_crystal_size_mid           0.429
_exptl_crystal_size_min           0.387
_exptl_absorpt_coefficient_mu     0.107
_shelx_estimated_absorpt_T_min    0.952
_shelx_estimated_absorpt_T_max    0.960
_exptl_absorpt_correction_type    none 
_exptl_absorpt_correction_T_min   ? 
_exptl_absorpt_correction_T_max   ? 
_exptl_absorpt_process_details    ? 
 
_exptl_special_details
;
 ?
;
 
_diffrn_ambient_temperature       170(2)
_diffrn_radiation_wavelength      0.71073
_diffrn_radiation_type            MoK\a
_diffrn_source                    'fine-focus sealed tube'                       
_diffrn_measurement_device_type   'STOE IPDS2T' 
_diffrn_measurement_method        \w 
_diffrn_detector_area_resol_mean  ? 
_diffrn_reflns_number             20628
_diffrn_reflns_av_unetI/netI      0.0615
_diffrn_reflns_av_R_equivalents   0.1049
_diffrn_reflns_limit_h_min        -11
_diffrn_reflns_limit_h_max        11
_diffrn_reflns_limit_k_min        -26
_diffrn_reflns_limit_k_max        24
_diffrn_reflns_limit_l_min        -27
_diffrn_reflns_limit_l_max        33
_diffrn_reflns_theta_min          3.308
_diffrn_reflns_theta_max          29.264
_diffrn_reflns_theta_full         25.242
_diffrn_measured_fraction_theta_max   0.988
_diffrn_measured_fraction_theta_full  0.994
_diffrn_reflns_Laue_measured_fraction_max    0.988
_diffrn_reflns_Laue_measured_fraction_full   0.994
_diffrn_reflns_point_group_measured_fraction_max   0.987
_diffrn_reflns_point_group_measured_fraction_full  0.996
_reflns_number_total              5300
_reflns_number_gt                 4727
_reflns_threshold_expression      'I > 2\s(I)'
_reflns_Friedel_coverage          0.797
_reflns_Friedel_fraction_max      0.986
_reflns_Friedel_fraction_full     0.999
 
_reflns_special_details
;
 Reflections were merged by SHELXL according to the crystal
 class for the calculation of statistics and refinement.
 
 _reflns_Friedel_fraction is defined as the number of unique
 Friedel pairs measured divided by the number that would be
 possible theoretically, ignoring centric projections and
 systematic absences.
;
 
_computing_data_collection        ?
_computing_cell_refinement        ?
_computing_data_reduction         ?
_computing_structure_solution     ?
_computing_structure_refinement   'SHELXL-2013 (Sheldrick, 2013)'
_computing_molecular_graphics     ?
_computing_publication_material   ?
 
_refine_special_details
;
 ?
;
_refine_ls_structure_factor_coef  Fsqd
_refine_ls_matrix_type            full
_refine_ls_weighting_scheme       calc
_refine_ls_weighting_details
'w=1/[\s^2^(Fo^2^)+(0.0753P)^2^+0.4381P] where P=(Fo^2^+2Fc^2^)/3'
_atom_sites_solution_primary      ?
_atom_sites_solution_secondary    ?
_atom_sites_solution_hydrogens    mixed
_refine_ls_hydrogen_treatment     mixed
_refine_ls_extinction_method      none
_refine_ls_extinction_coef        .
_refine_ls_abs_structure_details
;
 Flack x determined using 1923 quotients [(I+)-(I-)]/[(I+)+(I-)]
 (Parsons and Flack (2004), Acta Cryst. A60, s61).
;
_refine_ls_abs_structure_Flack    ?
_chemical_absolute_configuration  unk
_refine_ls_number_reflns          5300
_refine_ls_number_parameters      287
_refine_ls_number_restraints      7
_refine_ls_R_factor_all           0.0518
_refine_ls_R_factor_gt            0.0458
_refine_ls_wR_factor_ref          0.1179
_refine_ls_wR_factor_gt           0.1119
_refine_ls_goodness_of_fit_ref    1.001
_refine_ls_restrained_S_all       1.001
_refine_ls_shift/su_max           0.000
_refine_ls_shift/su_mean          0.000
 
loop_
 _atom_site_label
 _atom_site_type_symbol
 _atom_site_fract_x
 _atom_site_fract_y
 _atom_site_fract_z
 _atom_site_U_iso_or_equiv
 _atom_site_adp_type
 _atom_site_occupancy
 _atom_site_site_symmetry_order  
 _atom_site_calc_flag
 _atom_site_refinement_flags_posn
 _atom_site_refinement_flags_adp
 _atom_site_refinement_flags_occupancy
 _atom_site_disorder_assembly
 _atom_site_disorder_group
O1 O 0.6011(2) 0.13362(9) 0.20601(7) 0.0298(3) Uani 1 1 d . . . . .
H1 H 0.6644 0.1243 0.2317 0.045 Uiso 1 1 calc R U . . .
O2 O 0.8871(2) 0.07235(8) 0.06459(7) 0.0269(3) Uani 1 1 d . . . . .
H2O H 0.8797 0.0286 0.0649 0.040 Uiso 1 1 calc R U . . .
O3 O 0.55480(16) 0.13186(7) 0.08582(6) 0.0213(3) Uani 1 1 d . . . . .
O4 O 0.6327(2) 0.27749(8) -0.01984(6) 0.0274(3) Uani 1 1 d . . . . .
O5 O 0.3469(2) 0.43407(8) 0.07729(7) 0.0295(3) Uani 1 1 d . . . . .
N1 N 0.5790(2) 0.25205(9) 0.07078(7) 0.0219(3) Uani 1 1 d . . . . .
N2 N 0.4859(2) 0.35343(9) 0.03056(8) 0.0224(3) Uani 1 1 d . . . . .
H2N H 0.470(4) 0.3778(16) 0.0013(14) 0.027 Uiso 1 1 d . U . . .
C1 C 0.5729(2) 0.07219(11) 0.17388(9) 0.0249(4) Uani 1 1 d . . . . .
H1A H 0.4582 0.0639 0.1714 0.030 Uiso 1 1 calc R U . . .
H1B H 0.6209 0.0315 0.1927 0.030 Uiso 1 1 calc R U . . .
C2 C 0.6401(2) 0.07843(10) 0.11617(8) 0.0201(4) Uani 1 1 d . . . . .
H2 H 0.6266 0.0327 0.0967 0.024 Uiso 1 1 calc R U . . .
C3 C 0.8136(2) 0.10013(10) 0.11265(9) 0.0203(4) Uani 1 1 d . . . . .
H3 H 0.8724 0.0874 0.1471 0.024 Uiso 1 1 calc R U . . .
C4 C 0.8040(2) 0.17859(10) 0.10504(9) 0.0217(4) Uani 1 1 d . . . . .
H4A H 0.8996 0.1973 0.0869 0.026 Uiso 1 1 calc R U . . .
H4B H 0.7876 0.2029 0.1408 0.026 Uiso 1 1 calc R U . . .
C5 C 0.6605(2) 0.18493(10) 0.06762(8) 0.0202(4) Uani 1 1 d . . . . .
H5 H 0.6919 0.1756 0.0284 0.024 Uiso 1 1 calc R U . . .
C6 C 0.5098(3) 0.27190(11) 0.11979(9) 0.0228(4) Uani 1 1 d . . . . .
H6 H 0.5204 0.2419 0.1509 0.027 Uiso 1 1 calc R U . . .
C7 C 0.4276(3) 0.33182(10) 0.12600(9) 0.0224(4) Uani 1 1 d . . . . .
C8 C 0.4152(2) 0.37789(10) 0.07811(9) 0.0222(4) Uani 1 1 d . . . . .
C9 C 0.5711(2) 0.29304(10) 0.02400(9) 0.0212(4) Uani 1 1 d . . . . .
C10 C 0.3528(3) 0.35002(11) 0.17925(9) 0.0250(4) Uani 1 1 d . . . . .
C11 C 0.2879(3) 0.29783(12) 0.21250(10) 0.0304(5) Uani 1 1 d . . . . .
H11 H 0.2856 0.2510 0.1995 0.037 Uiso 1 1 calc R U . . .
C12 C 0.2270(3) 0.31334(12) 0.26420(10) 0.0327(5) Uani 1 1 d . . . . .
H12 H 0.1830 0.2770 0.2860 0.039 Uiso 1 1 calc R U . . .
C13 C 0.2290(3) 0.38129(12) 0.28487(9) 0.0278(4) Uani 1 1 d . . . . .
C14 C 0.2891(3) 0.43355(11) 0.25090(10) 0.0284(4) Uani 1 1 d . . . . .
H14 H 0.2889 0.4805 0.2636 0.034 Uiso 1 1 calc R U . . .
C15 C 0.3494(3) 0.41841(11) 0.19880(9) 0.0276(4) Uani 1 1 d . . . . .
H15 H 0.3887 0.4552 0.1763 0.033 Uiso 1 1 calc R U . . .
C16 C 0.1759(3) 0.39703(12) 0.34201(9) 0.0291(5) Uani 1 1 d . . . . .
C17 C 0.0607(3) 0.35693(14) 0.36769(11) 0.0360(5) Uani 1 1 d . . . . .
H17 H 0.0105 0.3205 0.3477 0.043 Uiso 1 1 calc R U . . .
C18 C 0.0183(4) 0.36960(15) 0.42224(12) 0.0411(6) Uani 1 1 d . . . . .
H18 H -0.0608 0.3418 0.4392 0.049 Uiso 1 1 calc R U . . .
C19 C 0.0901(4) 0.42227(15) 0.45223(11) 0.0396(6) Uani 1 1 d . . . . .
H19 H 0.0620 0.4301 0.4898 0.047 Uiso 1 1 calc R U . . .
C20 C 0.2035(4) 0.46363(15) 0.42705(11) 0.0390(6) Uani 1 1 d . . . . .
H20 H 0.2520 0.5005 0.4471 0.047 Uiso 1 1 calc R U . . .
C21 C 0.2457(3) 0.45088(14) 0.37245(10) 0.0332(5) Uani 1 1 d . . . . .
H21 H 0.3235 0.4793 0.3554 0.040 Uiso 1 1 calc R U . . .
O11 O 0.2265(2) 0.14908(12) 0.11745(8) 0.0400(4) Uani 1 1 d D . . . .
H11O H 0.189(4) 0.170(2) 0.0886(15) 0.060 Uiso 1 1 d D U . . .
H11P H 0.320(4) 0.144(2) 0.1056(17) 0.060 Uiso 1 1 d D U . . .
O12 O 0.8546(3) 0.11545(15) 0.27378(10) 0.0559(6) Uani 1 1 d D . . . .
H12O H 0.835(6) 0.128(3) 0.3080(14) 0.084 Uiso 1 1 d D U . . .
H12P H 0.903(6) 0.152(2) 0.265(2) 0.084 Uiso 1 1 d D U . . .
 
loop_
 _atom_site_aniso_label
 _atom_site_aniso_U_11
 _atom_site_aniso_U_22
 _atom_site_aniso_U_33
 _atom_site_aniso_U_23
 _atom_site_aniso_U_13
 _atom_site_aniso_U_12
O1 0.0308(7) 0.0373(9) 0.0212(7) -0.0010(6) 0.0025(6) 0.0016(7)
O2 0.0353(8) 0.0168(6) 0.0286(8) 0.0034(6) 0.0131(6) 0.0049(6)
O3 0.0224(6) 0.0188(7) 0.0226(7) 0.0035(5) -0.0040(5) 0.0007(5)
O4 0.0378(8) 0.0240(7) 0.0204(7) 0.0036(6) 0.0052(6) 0.0043(6)
O5 0.0406(8) 0.0178(7) 0.0301(8) 0.0046(6) 0.0013(7) 0.0086(6)
N1 0.0301(8) 0.0165(7) 0.0190(8) 0.0016(6) 0.0011(7) 0.0055(7)
N2 0.0307(8) 0.0168(8) 0.0196(8) 0.0046(6) -0.0015(7) 0.0026(6)
C1 0.0235(9) 0.0268(10) 0.0244(10) 0.0076(8) 0.0028(8) 0.0012(8)
C2 0.0218(8) 0.0167(8) 0.0218(9) 0.0034(7) -0.0010(7) 0.0018(7)
C3 0.0218(8) 0.0184(8) 0.0208(9) 0.0026(7) 0.0026(7) 0.0030(7)
C4 0.0221(8) 0.0184(9) 0.0246(10) 0.0002(7) 0.0010(7) 0.0000(7)
C5 0.0257(9) 0.0158(8) 0.0192(9) 0.0015(6) 0.0022(7) 0.0030(7)
C6 0.0297(9) 0.0201(9) 0.0188(9) 0.0034(7) 0.0005(8) 0.0049(7)
C7 0.0292(9) 0.0180(9) 0.0200(9) 0.0003(7) 0.0001(7) 0.0039(7)
C8 0.0269(9) 0.0164(8) 0.0233(9) 0.0007(7) -0.0013(8) 0.0015(7)
C9 0.0254(9) 0.0176(8) 0.0205(9) 0.0018(7) -0.0011(7) -0.0001(7)
C10 0.0336(10) 0.0210(9) 0.0203(9) 0.0021(7) 0.0014(8) 0.0086(8)
C11 0.0442(12) 0.0196(9) 0.0275(11) 0.0014(8) 0.0056(10) 0.0071(9)
C12 0.0464(13) 0.0251(11) 0.0267(11) 0.0053(8) 0.0063(10) 0.0067(9)
C13 0.0342(10) 0.0267(10) 0.0225(10) 0.0020(8) 0.0012(9) 0.0118(8)
C14 0.0397(11) 0.0222(9) 0.0232(9) -0.0011(8) 0.0005(9) 0.0095(9)
C15 0.0387(11) 0.0205(9) 0.0236(10) 0.0027(7) 0.0013(9) 0.0058(8)
C16 0.0364(11) 0.0279(11) 0.0230(10) 0.0034(8) 0.0021(9) 0.0141(9)
C17 0.0425(12) 0.0330(12) 0.0323(12) 0.0018(9) 0.0062(10) 0.0083(10)
C18 0.0517(15) 0.0362(13) 0.0354(13) 0.0048(10) 0.0135(11) 0.0088(11)
C19 0.0514(15) 0.0427(14) 0.0246(11) 0.0011(10) 0.0084(10) 0.0142(12)
C20 0.0484(14) 0.0427(14) 0.0260(12) -0.0042(10) 0.0013(10) 0.0115(12)
C21 0.0386(12) 0.0361(12) 0.0250(11) 0.0003(9) 0.0035(9) 0.0096(9)
O11 0.0283(8) 0.0591(12) 0.0325(9) 0.0132(9) -0.0001(7) 0.0080(8)
O12 0.0569(13) 0.0701(16) 0.0408(12) -0.0075(11) 0.0075(11) 0.0169(12)
 
_geom_special_details
;
 All esds (except the esd in the dihedral angle between two l.s. planes)
 are estimated using the full covariance matrix.  The cell esds are taken
 into account individually in the estimation of esds in distances, angles
 and torsion angles; correlations between esds in cell parameters are only
 used when they are defined by crystal symmetry.  An approximate (isotropic)
 treatment of cell esds is used for estimating esds involving l.s. planes.
;
 
loop_
 _geom_bond_atom_site_label_1
 _geom_bond_atom_site_label_2
 _geom_bond_distance
 _geom_bond_site_symmetry_2
 _geom_bond_publ_flag
O1 C1 1.429(3) . ?
O1 H1 0.8400 . ?
O2 C3 1.421(2) . ?
O2 H2O 0.8400 . ?
O3 C5 1.425(2) . ?
O3 C2 1.452(2) . ?
O4 C9 1.218(3) . ?
O5 C8 1.222(2) . ?
N1 C6 1.375(3) . ?
N1 C9 1.377(3) . ?
N1 C5 1.461(2) . ?
N2 C9 1.373(3) . ?
N2 C8 1.378(3) . ?
N2 H2N 0.86(3) . ?
C1 C2 1.510(3) . ?
C1 H1A 0.9900 . ?
C1 H1B 0.9900 . ?
C2 C3 1.535(3) . ?
C2 H2 1.0000 . ?
C3 C4 1.515(3) . ?
C3 H3 1.0000 . ?
C4 C5 1.523(3) . ?
C4 H4A 0.9900 . ?
C4 H4B 0.9900 . ?
C5 H5 1.0000 . ?
C6 C7 1.351(3) . ?
C6 H6 0.9500 . ?
C7 C8 1.458(3) . ?
C7 C10 1.476(3) . ?
C10 C15 1.391(3) . ?
C10 C11 1.395(3) . ?
C11 C12 1.383(3) . ?
C11 H11 0.9500 . ?
C12 C13 1.393(3) . ?
C12 H12 0.9500 . ?
C13 C14 1.390(3) . ?
C13 C16 1.482(3) . ?
C14 C15 1.389(3) . ?
C14 H14 0.9500 . ?
C15 H15 0.9500 . ?
C16 C17 1.390(4) . ?
C16 C21 1.398(4) . ?
C17 C18 1.386(4) . ?
C17 H17 0.9500 . ?
C18 C19 1.383(4) . ?
C18 H18 0.9500 . ?
C19 C20 1.387(4) . ?
C19 H19 0.9500 . ?
C20 C21 1.388(3) . ?
C20 H20 0.9500 . ?
C21 H21 0.9500 . ?
O11 H11O 0.86(3) . ?
O11 H11P 0.86(3) . ?
O12 H12O 0.87(3) . ?
O12 H12P 0.85(3) . ?
 
loop_
 _geom_angle_atom_site_label_1
 _geom_angle_atom_site_label_2
 _geom_angle_atom_site_label_3
 _geom_angle
 _geom_angle_site_symmetry_1
 _geom_angle_site_symmetry_3
 _geom_angle_publ_flag
C1 O1 H1 109.5 . . ?
C3 O2 H2O 109.5 . . ?
C5 O3 C2 110.01(14) . . ?
C6 N1 C9 121.82(17) . . ?
C6 N1 C5 119.38(17) . . ?
C9 N1 C5 118.78(17) . . ?
C9 N2 C8 127.75(18) . . ?
C9 N2 H2N 116(2) . . ?
C8 N2 H2N 116(2) . . ?
O1 C1 C2 111.85(17) . . ?
O1 C1 H1A 109.2 . . ?
C2 C1 H1A 109.2 . . ?
O1 C1 H1B 109.2 . . ?
C2 C1 H1B 109.2 . . ?
H1A C1 H1B 107.9 . . ?
O3 C2 C1 109.40(16) . . ?
O3 C2 C3 105.17(15) . . ?
C1 C2 C3 115.84(17) . . ?
O3 C2 H2 108.7 . . ?
C1 C2 H2 108.7 . . ?
C3 C2 H2 108.7 . . ?
O2 C3 C4 107.21(16) . . ?
O2 C3 C2 111.50(17) . . ?
C4 C3 C2 102.87(16) . . ?
O2 C3 H3 111.6 . . ?
C4 C3 H3 111.6 . . ?
C2 C3 H3 111.6 . . ?
C3 C4 C5 101.20(16) . . ?
C3 C4 H4A 111.5 . . ?
C5 C4 H4A 111.5 . . ?
C3 C4 H4B 111.5 . . ?
C5 C4 H4B 111.5 . . ?
H4A C4 H4B 109.3 . . ?
O3 C5 N1 108.14(16) . . ?
O3 C5 C4 105.40(15) . . ?
N1 C5 C4 114.76(17) . . ?
O3 C5 H5 109.5 . . ?
N1 C5 H5 109.5 . . ?
C4 C5 H5 109.5 . . ?
C7 C6 N1 123.46(19) . . ?
C7 C6 H6 118.3 . . ?
N1 C6 H6 118.3 . . ?
C6 C7 C8 117.57(19) . . ?
C6 C7 C10 121.32(18) . . ?
C8 C7 C10 121.11(18) . . ?
O5 C8 N2 119.52(19) . . ?
O5 C8 C7 125.4(2) . . ?
N2 C8 C7 115.06(18) . . ?
O4 C9 N2 122.20(19) . . ?
O4 C9 N1 123.52(19) . . ?
N2 C9 N1 114.28(18) . . ?
C15 C10 C11 118.0(2) . . ?
C15 C10 C7 121.75(19) . . ?
C11 C10 C7 120.16(19) . . ?
C12 C11 C10 120.9(2) . . ?
C12 C11 H11 119.6 . . ?
C10 C11 H11 119.6 . . ?
C11 C12 C13 121.3(2) . . ?
C11 C12 H12 119.4 . . ?
C13 C12 H12 119.4 . . ?
C14 C13 C12 117.7(2) . . ?
C14 C13 C16 121.0(2) . . ?
C12 C13 C16 121.3(2) . . ?
C15 C14 C13 121.3(2) . . ?
C15 C14 H14 119.3 . . ?
C13 C14 H14 119.3 . . ?
C14 C15 C10 120.7(2) . . ?
C14 C15 H15 119.6 . . ?
C10 C15 H15 119.6 . . ?
C17 C16 C21 118.1(2) . . ?
C17 C16 C13 121.2(2) . . ?
C21 C16 C13 120.6(2) . . ?
C18 C17 C16 120.7(3) . . ?
C18 C17 H17 119.7 . . ?
C16 C17 H17 119.7 . . ?
C19 C18 C17 120.7(3) . . ?
C19 C18 H18 119.7 . . ?
C17 C18 H18 119.7 . . ?
C18 C19 C20 119.6(2) . . ?
C18 C19 H19 120.2 . . ?
C20 C19 H19 120.2 . . ?
C19 C20 C21 119.7(3) . . ?
C19 C20 H20 120.2 . . ?
C21 C20 H20 120.2 . . ?
C20 C21 C16 121.3(3) . . ?
C20 C21 H21 119.4 . . ?
C16 C21 H21 119.4 . . ?
H11O O11 H11P 98(3) . . ?
H12O O12 H12P 96(4) . . ?
 
loop_
 _geom_torsion_atom_site_label_1
 _geom_torsion_atom_site_label_2
 _geom_torsion_atom_site_label_3
 _geom_torsion_atom_site_label_4
 _geom_torsion
 _geom_torsion_site_symmetry_1
 _geom_torsion_site_symmetry_2
 _geom_torsion_site_symmetry_3
 _geom_torsion_site_symmetry_4
 _geom_torsion_publ_flag
C5 O3 C2 C1 121.67(17) . . . . ?
C5 O3 C2 C3 -3.4(2) . . . . ?
O1 C1 C2 O3 -66.8(2) . . . . ?
O1 C1 C2 C3 51.8(2) . . . . ?
O3 C2 C3 O2 -88.42(18) . . . . ?
C1 C2 C3 O2 150.66(17) . . . . ?
O3 C2 C3 C4 26.2(2) . . . . ?
C1 C2 C3 C4 -94.74(19) . . . . ?
O2 C3 C4 C5 80.19(19) . . . . ?
C2 C3 C4 C5 -37.49(19) . . . . ?
C2 O3 C5 N1 -144.05(16) . . . . ?
C2 O3 C5 C4 -20.9(2) . . . . ?
C6 N1 C5 O3 53.6(2) . . . . ?
C9 N1 C5 O3 -125.00(19) . . . . ?
C6 N1 C5 C4 -63.7(2) . . . . ?
C9 N1 C5 C4 117.7(2) . . . . ?
C3 C4 C5 O3 36.43(19) . . . . ?
C3 C4 C5 N1 155.29(16) . . . . ?
C9 N1 C6 C7 0.9(3) . . . . ?
C5 N1 C6 C7 -177.7(2) . . . . ?
N1 C6 C7 C8 -1.2(3) . . . . ?
N1 C6 C7 C10 178.7(2) . . . . ?
C9 N2 C8 O5 177.9(2) . . . . ?
C9 N2 C8 C7 -3.1(3) . . . . ?
C6 C7 C8 O5 -179.0(2) . . . . ?
C10 C7 C8 O5 1.1(4) . . . . ?
C6 C7 C8 N2 2.0(3) . . . . ?
C10 C7 C8 N2 -177.86(19) . . . . ?
C8 N2 C9 O4 -177.7(2) . . . . ?
C8 N2 C9 N1 2.8(3) . . . . ?
C6 N1 C9 O4 179.0(2) . . . . ?
C5 N1 C9 O4 -2.4(3) . . . . ?
C6 N1 C9 N2 -1.5(3) . . . . ?
C5 N1 C9 N2 177.08(18) . . . . ?
C6 C7 C10 C15 142.1(2) . . . . ?
C8 C7 C10 C15 -38.0(3) . . . . ?
C6 C7 C10 C11 -35.6(3) . . . . ?
C8 C7 C10 C11 144.3(2) . . . . ?
C15 C10 C11 C12 -2.2(4) . . . . ?
C7 C10 C11 C12 175.6(2) . . . . ?
C10 C11 C12 C13 -0.3(4) . . . . ?
C11 C12 C13 C14 2.3(4) . . . . ?
C11 C12 C13 C16 -174.9(2) . . . . ?
C12 C13 C14 C15 -1.8(4) . . . . ?
C16 C13 C14 C15 175.4(2) . . . . ?
C13 C14 C15 C10 -0.7(4) . . . . ?
C11 C10 C15 C14 2.7(3) . . . . ?
C7 C10 C15 C14 -175.0(2) . . . . ?
C14 C13 C16 C17 152.8(2) . . . . ?
C12 C13 C16 C17 -30.1(3) . . . . ?
C14 C13 C16 C21 -30.1(3) . . . . ?
C12 C13 C16 C21 147.0(3) . . . . ?
C21 C16 C17 C18 -0.9(4) . . . . ?
C13 C16 C17 C18 176.3(2) . . . . ?
C16 C17 C18 C19 -0.2(4) . . . . ?
C17 C18 C19 C20 1.2(4) . . . . ?
C18 C19 C20 C21 -1.2(4) . . . . ?
C19 C20 C21 C16 0.1(4) . . . . ?
C17 C16 C21 C20 0.9(4) . . . . ?
C13 C16 C21 C20 -176.3(2) . . . . ?
 
_refine_diff_density_max    0.323
_refine_diff_density_min   -0.326
_refine_diff_density_rms    0.055

_shelxl_version_number 2013-3

_shelx_res_file
;
TITL VGB26 in C2221
CELL  0.71073   8.5030  19.1360  24.1380   90.000   90.000   90.000
ZERR     8.00   0.0020   0.0040   0.0050    0.000    0.000    0.000
LATT  -7
SYMM  - X, - Y, 1/2 + Z
SYMM    X, - Y, - Z
SYMM  - X,   Y, 1/2 - Z
SFAC  C    H    N    O
UNIT  168  192  16   56
MERG   2
SADI O11 H11O O11 H11P O12 H12O O12 H12P
SADI H11O H11P H12O H12P
FMAP   2
PLAN -5
ACTA
SIZE 0.466 0.429 0.387
BOND $H
CONF
L.S.  25
TEMP  -103.00
WGHT    0.075300    0.438100
FVAR       0.10327
O1    4    0.601108    0.133624    0.206011    11.00000    0.03081    0.03735 =
         0.02118   -0.00098    0.00246    0.00164
AFIX  83
H1    2    0.664412    0.124305    0.231685    11.00000   -1.50000
AFIX   0
O2    4    0.887056    0.072347    0.064591    11.00000    0.03528    0.01678 =
         0.02862    0.00339    0.01311    0.00494
AFIX 147
H2O   2    0.879733    0.028574    0.064901    11.00000   -1.50000
AFIX   0
O3    4    0.554798    0.131864    0.085818    11.00000    0.02238    0.01879 =
         0.02264    0.00354   -0.00396    0.00071
O4    4    0.632720    0.277489   -0.019840    11.00000    0.03782    0.02397 =
         0.02042    0.00364    0.00520    0.00434
O5    4    0.346894    0.434074    0.077287    11.00000    0.04060    0.01783 =
         0.03008    0.00464    0.00127    0.00857
N1    3    0.579042    0.252048    0.070781    11.00000    0.03009    0.01653 =
         0.01904    0.00159    0.00114    0.00548
N2    3    0.485868    0.353427    0.030556    11.00000    0.03068    0.01682 =
         0.01956    0.00458   -0.00147    0.00257
H2N   2    0.470367    0.377795    0.001285    11.00000   -1.20000
C1    1    0.572922    0.072191    0.173880    11.00000    0.02347    0.02679 =
         0.02443    0.00763    0.00284    0.00118
AFIX  23
H1A   2    0.458205    0.063918    0.171406    11.00000   -1.20000
H1B   2    0.620896    0.031463    0.192696    11.00000   -1.20000
AFIX   0
C2    1    0.640089    0.078434    0.116167    11.00000    0.02176    0.01665 =
         0.02178    0.00344   -0.00102    0.00179
AFIX  13
H2    2    0.626552    0.032715    0.096676    11.00000   -1.20000
AFIX   0
C3    1    0.813598    0.100131    0.112646    11.00000    0.02182    0.01837 =
         0.02077    0.00256    0.00264    0.00297
AFIX  13
H3    2    0.872351    0.087442    0.147096    11.00000   -1.20000
AFIX   0
C4    1    0.803954    0.178588    0.105044    11.00000    0.02213    0.01836 =
         0.02461    0.00024    0.00103    0.00000
AFIX  23
H4A   2    0.899565    0.197273    0.086924    11.00000   -1.20000
H4B   2    0.787569    0.202860    0.140802    11.00000   -1.20000
AFIX   0
C5    1    0.660480    0.184929    0.067622    11.00000    0.02566    0.01576 =
         0.01916    0.00151    0.00219    0.00298
AFIX  13
H5    2    0.691936    0.175596    0.028395    11.00000   -1.20000
AFIX   0
C6    1    0.509822    0.271900    0.119791    11.00000    0.02972    0.02005 =
         0.01876    0.00338    0.00052    0.00489
AFIX  43
H6    2    0.520356    0.241911    0.150936    11.00000   -1.20000
AFIX   0
C7    1    0.427587    0.331824    0.125998    11.00000    0.02919    0.01799 =
         0.02004    0.00031    0.00012    0.00392
C8    1    0.415152    0.377891    0.078110    11.00000    0.02695    0.01641 =
         0.02330    0.00073   -0.00133    0.00148
C9    1    0.571060    0.293040    0.024004    11.00000    0.02543    0.01763 =
         0.02053    0.00176   -0.00114   -0.00008
C10   1    0.352766    0.350024    0.179252    11.00000    0.03363    0.02099 =
         0.02029    0.00209    0.00141    0.00858
C11   1    0.287937    0.297835    0.212496    11.00000    0.04421    0.01964 =
         0.02747    0.00143    0.00560    0.00709
AFIX  43
H11   2    0.285587    0.251004    0.199461    11.00000   -1.20000
AFIX   0
C12   1    0.227006    0.313343    0.264199    11.00000    0.04640    0.02508 =
         0.02670    0.00528    0.00629    0.00674
AFIX  43
H12   2    0.182973    0.276952    0.286018    11.00000   -1.20000
AFIX   0
C13   1    0.228991    0.381294    0.284872    11.00000    0.03419    0.02666 =
         0.02250    0.00199    0.00121    0.01175
C14   1    0.289104    0.433547    0.250905    11.00000    0.03969    0.02219 =
         0.02325   -0.00111    0.00054    0.00946
AFIX  43
H14   2    0.288946    0.480539    0.263596    11.00000   -1.20000
AFIX   0
C15   1    0.349362    0.418410    0.198802    11.00000    0.03865    0.02055 =
         0.02357    0.00270    0.00128    0.00580
AFIX  43
H15   2    0.388701    0.455153    0.176253    11.00000   -1.20000
AFIX   0
C16   1    0.175858    0.397029    0.342008    11.00000    0.03638    0.02786 =
         0.02295    0.00340    0.00210    0.01408
C17   1    0.060691    0.356933    0.367689    11.00000    0.04254    0.03302 =
         0.03232    0.00185    0.00624    0.00828
AFIX  43
H17   2    0.010487    0.320482    0.347661    11.00000   -1.20000
AFIX   0
C18   1    0.018340    0.369596    0.422241    11.00000    0.05174    0.03621 =
         0.03539    0.00481    0.01346    0.00879
AFIX  43
H18   2   -0.060772    0.341813    0.439188    11.00000   -1.20000
AFIX   0
C19   1    0.090121    0.422268    0.452227    11.00000    0.05138    0.04270 =
         0.02460    0.00110    0.00837    0.01423
AFIX  43
H19   2    0.062002    0.430077    0.489811    11.00000   -1.20000
AFIX   0
C20   1    0.203473    0.463629    0.427054    11.00000    0.04839    0.04271 =
         0.02597   -0.00420    0.00130    0.01147
AFIX  43
H20   2    0.251979    0.500511    0.447106    11.00000   -1.20000
AFIX   0
C21   1    0.245672    0.450878    0.372448    11.00000    0.03860    0.03606 =
         0.02496    0.00025    0.00350    0.00961
AFIX  43
H21   2    0.323506    0.479292    0.355423    11.00000   -1.20000
AFIX   0
O11   4    0.226463    0.149076    0.117454    11.00000    0.02828    0.05914 =
         0.03248    0.01324   -0.00009    0.00804
H11O  2    0.188572    0.169509    0.088603    11.00000   -1.50000
H11P  2    0.320472    0.143520    0.105587    11.00000   -1.50000
O12   4    0.854595    0.115452    0.273775    11.00000    0.05688    0.07008 =
         0.04085   -0.00755    0.00751    0.01686
H12O  2    0.834944    0.127764    0.307961    11.00000   -1.50000
H12P  2    0.902815    0.152493    0.264792    11.00000   -1.50000
HKLF    4  1.0  0.00 -1.00  0.00  1.00  0.00  0.00  0.00  0.00  1.00

REM  VGB26 in C2221
REM R1 =  0.0458 for    4727 Fo > 4sig(Fo)  and  0.0518 for all    5300 data
REM    287 parameters refined using      7 restraints

END

WGHT      0.0726      0.1612

REM Highest difference peak  0.323,  deepest hole -0.326,  1-sigma level  0.055
Q1    1   0.4197  0.3525  0.1017  11.00000  0.05    0.32
Q2    1   0.8139  0.1409  0.1105  11.00000  0.05    0.24
Q3    1   0.3791  0.3411  0.1491  11.00000  0.05    0.23
Q4    1   0.2385  0.4572  0.4001  11.00000  0.05    0.22
Q5    1   0.4281  0.2956  0.1164  11.00000  0.05    0.22
;
_shelx_res_checksum    9962

_shelx_hkl_file
;
 -13   1  11    4.12    0.33
 -13   1  12    0.19    0.25
 -13   1  13   23.45    0.38
 -13   1  14   10.97    0.32
 -13   1  15    3.33    0.25
 -13   1  16    4.51    0.27
 -13   1  17   11.68    0.30
 -13   1  18    4.79    0.32
 -12   1   9    0.06    0.27
 -12   1  19   -0.06    0.25
 -12   1  20    0.70    0.28
 -11   1  20    5.44    0.27
 -11   1  21   18.52    0.34
 -10   1  21    0.36    0.25
 -10   1  22   -0.22    0.25
  -9   1   6   39.50    0.50
  -9   1  22    8.76    0.29
  -8   1  22    0.04    0.23
  -8   1  23    0.18    0.24
  -7   1  23    1.98    0.26
  -6   1   5    0.78    0.28
  -6   1  23    0.18    0.24
  -5   1  23   10.74    0.29
  -4   1  22    0.42    0.23
  -4   1  23    0.12    0.22
  -3   1   6   82.81    0.70
  -3   1  22    0.99    0.25
  -2   1   7    0.14    0.26
  -2   1  21   -0.12    0.24
  -1   1   8   13.56    0.34
  -1   1  20    7.64    0.28
   0   1  10   -0.06    0.24
   0   1  17    0.13    0.22
   0   1  18    0.08    0.24
   0   1  19    0.12    0.24
   1   1  13   12.76    0.30
   1   1  14    0.16    0.24
   1   1  15   10.64    0.30
   1   1  16    3.99    0.25
 -19   0  12    0.54    0.32
 -19   0  13    0.26    0.32
 -19   0  14   -0.13    0.31
 -19   0  15    0.23    0.31
 -19   0  16   -0.29    0.32
 -19   0  17   -0.34    0.33
 -18   0  20    0.55    0.30
 -18   0  21    0.28    0.36
 -17   0  23    0.21    0.35
 -16   0  24    2.57    0.31
 -16   0  25    2.44    0.32
 -15   0  26   -0.29    0.31
 -14   0  27    0.56    0.34
 -13   0  28    0.49    0.32
 -12   0  28    0.84    0.30
 -11   0  29    0.21    0.29
 -10   0  -1    2.11    0.71
 -10   0  29    3.87    0.29
  -9   0  30    0.31    0.31
  -8   0  30    0.55    0.34
  -7   0  30    0.34    0.31
  -6   0  30    4.94    0.31
  -5   0  30   -0.23    0.28
  -4   0  30    0.83    0.30
  -3   0  30   -0.04    0.27
  -2   0  29   -0.32    0.28
  -1   0  29    0.04    0.28
   0   0  28    3.07    0.28
   1   0  27    0.15    0.26
   2   0  26    1.40    0.26
   3   0  25    0.11    0.25
   4   0  24   15.58    0.31
   5   0  22    0.42    0.25
   6   0   9    0.56    0.28
   6   0  18    5.10    0.27
   6   0  19    0.97    0.25
 -21  -1   5   13.67    0.64
  -9  -1  -6   40.33    0.57
  -3  -1  -6   82.10    0.72
   0  -1  -5    0.07    0.22
   2  -1  32    0.04    0.31
   3  -1  31    0.10    0.30
   4  -1  30    0.04    0.29
   5  -1  29    1.69    0.29
   6  -1  28    0.01    0.30
   7  -1  26    2.50    0.29
   8  -1  24   -0.31    0.27
   9  -1  21    3.66    0.27
   9  -1  22    8.13    0.32
  10  -1  11    0.03    0.27
  10  -1  12    0.21    0.24
  10  -1  15    1.03    0.27
  10  -1  16    1.29    0.27
  10  -1  17    0.44    0.29
 -19  -2  -3    0.91    0.41
 -16  -2  -6    0.54    0.31
 -13  -2  -8   -0.04    0.32
  -1  -2  -9    0.37    0.18
   1  -2  -8    0.03    0.25
   4  -2  -6    6.65    0.29
   7  -2  31   -0.06    0.32
   8  -2  30    1.20    0.28
   9  -2   0    0.59    0.32
   9  -2  28    0.21    0.30
  10  -2   2    2.81    0.51
  10  -2  26    2.08    0.29
  11  -2  24    0.56    0.27
  12  -2   7    1.19    0.43
  12  -2  21    4.44    0.34
 -16  -3  -9    0.03    0.28
  -9  -3 -12    4.16    0.26
  -3  -3 -12    9.46    0.28
  -2  -3 -12    0.15    0.17
   4  -3  -9    0.31    0.25
  11  -3  -1   33.81    0.57
  12  -3  27    0.14    0.32
  13  -3  25    1.24    0.35
  14  -3  21   -0.09    0.30
 -24  -4  -3    2.13    0.48
 -22  -4  -6    2.53    0.43
 -18  -4 -10    3.28    0.34
 -15  -4 -12    0.59    0.30
 -13  -4 -13    0.23    0.25
 -10  -4 -14    3.98    0.25
  -9  -4 -14    0.09    0.25
  -3  -4 -14    0.31    0.23
  -2  -4 -14    2.54    0.25
   1  -4 -13    0.48    0.23
   3  -4 -12    0.16    0.23
   6  -4 -10    2.80    0.25
   7  -4  -9    0.27    0.25
   8  -4  -8   19.22    0.35
   9  -4  -7    0.42    0.24
  15  -4  24    0.07    0.36
  16  -4  20    3.48    0.37
 -23  -5  -7    1.58    0.43
 -18  -5 -12   -0.18    0.34
 -15  -5 -14    0.53    0.28
 -12  -5 -15    0.40    0.25
  -9  -5 -16   10.20    0.30
  -8  -5 -16   -0.04    0.25
  -7  -5 -16    5.55    0.27
  -6  -5 -16    0.35    0.25
  -5  -5 -16    7.36    0.28
  -4  -5 -16    0.35    0.25
  -3  -5 -16    2.95    0.25
   0  -5 -15    0.44    0.25
   3  -5 -14    0.91    0.19
   6  -5 -12    0.44    0.24
   7  -5 -11    3.76    0.26
  10  -5  -8    0.52    0.28
  11  -5  -7   14.57    0.34
  14  -5  -2    0.81    0.30
 -20  -6 -12    0.11    0.38
 -17  -6 -14    0.04    0.34
 -13  -6 -16    0.41    0.25
 -10  -6 -17    6.77    0.28
  -9  -6 -17   -0.05    0.23
  -3  -6 -17   -0.01    0.24
  -2  -6 -17    0.63    0.25
   1  -6 -16    0.12    0.25
   5  -6 -14    0.26    0.25
   8  -6 -12    7.99    0.27
   9  -6 -11    0.06    0.23
  10  -6 -10    4.21    0.25
  13  -6  -6    0.30    0.25
  16  -6   0    9.25    0.42
  17  -6   3    0.12    0.38
 -16  -7 -16    0.25    0.33
 -14  -7 -17    0.10    0.30
 -13  -7 -17    2.52    0.32
 -11  -7 -18    1.54    0.27
 -10  -7 -18    0.11    0.27
  -9  -7 -18    2.42    0.26
  -3  -7 -18    1.48    0.25
  -2  -7 -18   -0.18    0.27
  -1  -7 -18    1.08    0.19
   1  -7 -17    3.65    0.27
   2  -7 -17   -0.01    0.19
   4  -7 -16    0.60    0.24
   5  -7 -15    3.97    0.26
   7  -7 -14    2.52    0.26
   8  -7 -13   -0.20    0.25
   9  -7 -12    8.56    0.28
  10  -7 -11    0.24    0.28
  11  -7 -10    8.30    0.32
  12  -7  -9    0.12    0.27
  14  -7  -6    0.16    0.27
  16  -7  -2   -0.07    0.31
  19  -7   9    4.37    0.76
 -10  -8 -19    0.43    0.28
  -9  -8 -19   -0.17    0.30
  -8  -8 -19    1.75    0.30
  -7  -8 -19   -0.16    0.30
  -6  -8 -19    0.82    0.26
  -5  -8 -19   -0.27    0.30
  -4  -8 -19    0.96    0.28
  -3  -8 -19   -0.14    0.28
  -2  -8 -19    0.83    0.21
   1  -8 -18    0.01    0.27
   3  -8 -17    0.09    0.27
   5  -8 -16    0.03    0.28
   8  -8 -14    4.50    0.29
   9  -8 -13    0.41    0.29
  10  -8 -12    1.73    0.29
  11  -8 -11   -0.09    0.27
  12  -8 -10    0.57    0.28
  14  -8  -7    1.66    0.34
  -2  -9 -19    0.38    0.27
  -1  -9 -19    1.77    0.30
   0  -9 -19    0.34    0.23
   2  -9 -18   -0.08    0.31
   4  -9 -17   -0.03    0.30
   6  -9 -16    0.18    0.30
  10  -9 -13    0.02    0.27
  11  -9 -12    0.77    0.29
  14  -9  -8   -0.01    0.34
 -14   1  12    0.12    0.29
 -14   1  13    0.37    0.29
 -14   1  14    0.41    0.25
 -14   1  15    0.25    0.24
 -14   1  16    0.22    0.26
 -14   1  17    0.29    0.29
 -13   1  10    2.76    0.26
 -13   1  19    8.68    0.31
 -13   1  20    7.54    0.30
 -12   1   8   -0.20    0.28
 -12   1  21    0.42    0.24
 -12   1  22    0.22    0.26
 -11   1   7    4.73    0.28
 -11   1  22    2.80    0.27
 -11   1  23    8.23    0.31
 -10   1   6    0.34    0.27
 -10   1  23    0.27    0.26
  -9   1  23    1.74    0.24
  -9   1  24    4.16    0.28
  -8   1   5    0.96    0.30
  -8   1  24    0.17    0.27
  -7   1   5   67.55    0.67
  -7   1  24    0.53    0.25
  -6   1  24    0.16    0.25
  -5   1   5   94.20    0.78
  -5   1  24    4.06    0.26
  -4   1  24    0.44    0.25
  -3   1  23    1.58    0.24
  -3   1  24    4.75    0.25
  -2   1  22    0.02    0.23
  -2   1  23    0.27    0.24
  -1   1  21    7.01    0.26
  -1   1  22    7.23    0.28
   0   1   9    0.44    0.25
   0   1  20    0.55    0.24
   0   1  21   -0.04    0.24
   1   1  11  147.60    0.73
   1   1  12   41.54    0.43
   1   1  17   15.61    0.31
   1   1  18    2.92    0.26
   1   1  19    0.10    0.24
 -19   0  10    0.04    0.32
 -19   0  11    0.13    0.29
 -19   0  18    0.19    0.30
 -19   0  19   -0.17    0.34
 -18   0   7   34.09    0.59
 -18   0  22    0.16    0.31
 -17   0   5    1.74    0.38
 -17   0  24    0.19    0.33
 -15   0  27   -0.15    0.31
 -12   0  29    0.30    0.31
 -10   0  30   -0.02    0.30
  -9   0  31   -0.03    0.32
  -8   0  31    0.46    0.32
  -7   0  31   -0.04    0.32
  -6   0  31    0.14    0.31
  -5   0  31    0.30    0.31
  -4   0  31    2.06    0.31
  -3   0  31    0.03    0.27
  -2   0  30   -0.05    0.28
  -1   0  30    0.39    0.28
   0   0  29   -0.22    0.27
   1   0  28   -0.08    0.26
   2   0  27    0.11    0.25
   3   0  26    0.02    0.27
   4   0  25    0.53    0.25
   5   0   6    0.11    0.22
   5   0  23    0.09    0.24
   6   0  20    0.77    0.24
   6   0  21   -0.08    0.23
   7   0  13    0.04    0.28
   7   0  14    0.24    0.24
   7   0  15   -0.13    0.25
   7   0  16    0.01    0.28
 -23  -1  14    0.00    0.40
 -23  -1  15    0.33    0.41
 -22  -1   8   -0.03    0.40
  -8  -1  -6    0.59    0.29
  -4  -1  -6    0.48    0.24
   3  -1  32    3.96    0.33
   4  -1  31   -0.10    0.29
   5  -1  30    4.24    0.30
   6  -1  29    0.52    0.30
   7  -1  27    6.24    0.31
   8  -1  25    0.00    0.26
   9  -1   6   40.39    0.73
   9  -1  23    1.92    0.26
  10  -1  10    0.13    0.26
  10  -1  18    0.36    0.25
  10  -1  19    0.28    0.24
 -18  -2  -4    4.30    0.41
 -17  -2  -5    0.20    0.31
 -10  -2  -9   10.70    0.32
  -2  -2  -9  139.62    0.75
   5  -2  -5    0.43    0.23
   9  -2  29   -0.19    0.31
  10  -2  27    0.23    0.30
  11  -2  25    0.28    0.29
  12  -2  22    2.09    0.32
  13  -2  13    0.41    0.32
  13  -2  14    0.04    0.26
  13  -2  15    0.42    0.28
  13  -2  16    0.03    0.27
 -23  -3  -1    2.11    0.60
 -21  -3  -4    4.46    0.44
 -17  -3  -8    0.41    0.29
 -14  -3 -10   -0.02    0.29
 -12  -3 -11    0.09    0.26
  -8  -3 -12    0.21    0.24
  -7  -3 -12    5.59    0.28
  -6  -3 -12    0.25    0.23
  -5  -3 -12   15.82    0.32
  -4  -3 -12   -0.04    0.23
   0  -3 -11    0.41    0.17
   2  -3 -10    0.51    0.23
   5  -3  -8   21.69    0.37
   6  -3  -7    0.99    0.28
   8  -3  -5    0.99    0.29
  12  -3  28   -0.01    0.33
  13  -3   4    5.12    0.67
  13  -3  26    4.16    0.38
  14  -3  22   -0.02    0.28
  15  -3  13    1.71    0.38
  15  -3  14   11.70    0.44
  15  -3  15    2.24    0.35
  15  -3  16    3.81    0.36
 -21  -4  -7    0.14    0.35
 -20  -4  -8    0.05    0.35
 -19  -4  -9   -0.05    0.30
 -16  -4 -11    2.41    0.30
 -12  -4 -13    2.57    0.26
  -8  -4 -14    2.38    0.26
  -7  -4 -14    0.45    0.25
  -6  -4 -14    2.53    0.25
  -5  -4 -14    0.28    0.23
  -4  -4 -14    3.42    0.26
   0  -4 -13    4.69    0.25
   2  -4 -12   17.90    0.31
   4  -4 -11   24.44    0.36
  16  -4  21    1.32    0.36
 -22  -5  -8    0.00    0.38
 -21  -5  -9    2.75    0.38
 -20  -5 -10    0.04    0.33
 -19  -5 -11    7.75    0.34
 -16  -5 -13    0.29    0.28
 -14  -5 -14    0.18    0.27
 -11  -5 -15    1.40    0.26
  -1  -5 -15   22.92    0.34
   2  -5 -14    1.49    0.26
   4  -5 -13    0.30    0.23
   8  -5 -10    0.38    0.22
   9  -5  -9   50.42    0.46
 -18  -6 -13    0.07    0.33
 -15  -6 -15    0.00    0.27
 -12  -6 -16    4.83    0.30
  -8  -6 -17    2.22    0.26
  -7  -6 -17    0.21    0.25
  -6  -6 -17    0.55    0.25
  -5  -6 -17   -0.23    0.25
  -4  -6 -17    7.00    0.26
   0  -6 -16    2.32    0.25
   3  -6 -15    0.25    0.17
   6  -6 -13    4.30    0.27
  12  -6  -7   12.69    0.33
  15  -6  -2    0.81    0.33
 -17  -7 -15    0.22    0.33
 -15  -7 -16   -0.24    0.32
 -12  -7 -17    0.07    0.30
  -8  -7 -18   -0.18    0.28
  -7  -7 -18    1.54    0.27
  -6  -7 -18    0.27    0.26
  -5  -7 -18    3.85    0.28
  -4  -7 -18   -0.02    0.25
   0  -7 -17    0.51    0.26
   3  -7 -16    2.60    0.25
   6  -7 -14    0.31    0.25
  13  -7  -7    0.39    0.29
  18  -7   4    0.31    0.40
 -12  -8 -18    1.53    0.31
 -11  -8 -18   -0.62    0.32
  -1  -8 -18   -0.03    0.28
   0  -8 -18    0.38    0.21
   2  -8 -17    1.26    0.28
   4  -8 -16    0.21    0.27
   6  -8 -15    5.12    0.30
   7  -8 -14    0.53    0.25
  13  -8  -8    0.42    0.34
  15  -8  -5    0.17    0.33
  17  -8  -1    0.24    0.35
  18  -8   2    0.94    0.42
  -6  -9 -19    0.35    0.32
  -5  -9 -19    0.11    0.33
  -4  -9 -19    0.05    0.32
  -3  -9 -19    1.10    0.30
   0  -9 -18    0.28    0.26
   1  -9 -18   -0.09    0.29
   3  -9 -17    0.12    0.30
   5  -9 -16    1.09    0.33
   8  -9 -14   -0.02    0.29
   9  -9 -13    1.22    0.32
  10  -9 -12   -0.37    0.31
  11  -9 -11    0.34    0.28
  12  -9 -10   -0.17    0.31
  13  -9  -9    0.83    0.32
  15  -9  -6    4.83    0.36
  16  -9  -4   -0.07    0.36
 -15   1  15   10.28    0.33
 -15   1  16    1.73    0.30
 -14   1  11    0.06    0.26
 -14   1  18   -0.35    0.26
 -14   1  19   -0.11    0.26
 -14   1  20    0.27    0.30
 -13   1   9    4.67    0.27
 -13   1  21    0.14    0.26
 -13   1  22   10.22    0.31
 -12   1   7    0.15    0.27
 -12   1  23    0.10    0.25
 -11   1  24    7.25    0.29
 -10   1  24   -0.22    0.27
 -10   1  25    0.23    0.28
  -9   1   5   71.39    0.71
  -9   1  25    9.09    0.31
  -8   1  25    0.27    0.27
  -8   1  26   -0.35    0.24
  -7   1  25    0.81    0.24
  -7   1  26    2.50    0.28
  -6   1  25    0.05    0.24
  -6   1  26    0.30    0.27
  -5   1  25    5.57    0.27
  -5   1  26    4.26    0.28
  -4   1   5    0.31    0.25
  -4   1  25    0.15    0.26
  -3   1  25    5.63    0.27
  -2   1   6    0.20    0.27
  -2   1  24    0.17    0.24
  -1   1   7   77.63    0.63
  -1   1  23   32.95    0.37
  -1   1  24   11.69    0.28
   0   1   8    0.02    0.25
   0   1  22    0.12    0.25
   1   1  10   10.53    0.31
   1   1  20    6.94    0.28
   1   1  21    6.40    0.28
   2   1  12   -0.05    0.25
   2   1  13    0.47    0.25
   2   1  14    0.20    0.24
   2   1  15    0.17    0.24
   2   1  16    0.23    0.23
   2   1  17    0.13    0.23
   2   1  18    0.28    0.24
 -20   0  15    2.59    0.33
 -19   0   9    0.11    0.33
 -19   0  20   -0.16    0.31
 -19   0  21    0.08    0.35
 -18   0  23    1.15    0.33
 -18   0  24    0.34    0.34
 -17   0  25   -0.29    0.33
 -15   0   2    0.24    0.46
 -14   0   1    0.02    0.68
  -6   0  32    1.06    0.33
  -5   0  32    0.09    0.30
  -4   0  32    0.10    0.31
  -3   0  32    0.00    0.28
  -2   0  31    0.43    0.29
  -1   0  31    0.09    0.29
   0   0  30    2.34    0.29
   1   0  29    0.14    0.25
   2   0  28    0.37    0.24
   2   0  29   -0.13    0.25
   3   0  27   -0.11    0.24
   4   0   4   68.18    0.89
   4   0  26    4.68    0.28
   5   0  24   -0.13    0.25
   5   0  25   -0.24    0.23
   6   0   8   67.15    0.64
   6   0  22   20.48    0.33
   7   0  11   -0.03    0.29
   7   0  12    0.53    0.24
   7   0  17   -0.06    0.24
   7   0  18    0.19    0.23
   7   0  19    0.44    0.23
 -23  -1  12    1.06    0.41
 -23  -1  13    1.57    0.41
 -13  -1  -4   11.67    0.48
 -11  -1  -5   41.66    0.62
  -7  -1  -6   86.69    0.75
  -6  -1  -6    0.76    0.24
  -5  -1  -6  116.31    0.84
  -1  -1  -5   24.00    0.49
   1  -1  -4  104.28    0.91
   4  -1  32   -0.02    0.30
   5  -1  31    5.24    0.33
   6  -1  30    0.25    0.31
   7  -1  28    7.08    0.32
   8  -1  26   -0.06    0.27
   9  -1  24    4.25    0.29
  10  -1   9    0.31    0.28
  10  -1  20   -0.06    0.25
  10  -1  21    0.16    0.29
 -21  -2   0    0.39    0.60
 -14  -2  -7   67.76    0.68
 -12  -2  -8   -0.07    0.29
  -9  -2  -9    0.00    0.24
  -8  -2  -9    8.24    0.30
  -4  -2  -9   77.30    0.58
  -3  -2  -9    0.25    0.24
   0  -2  -8   86.44    0.62
   2  -2  -7   77.84    0.61
   9  -2  30    0.19    0.32
  10  -2  28    0.62    0.31
  11  -2  26   -0.12    0.30
  12  -2  23    2.38    0.29
  13  -2  12    0.53    0.32
  13  -2  17   -0.04    0.29
  13  -2  18    0.37    0.30
 -24  -3   1    0.14    0.67
 -20  -3  -5   -0.10    0.34
 -19  -3  -6    0.62    0.34
 -18  -3  -7   -0.01    0.31
 -11  -3 -11    7.58    0.29
  -1  -3 -11   55.53    0.47
   1  -3 -10   28.83    0.37
   3  -3  -9   10.43    0.30
   7  -3  -6    9.49    0.31
  13  -3  27    0.36    0.38
  14  -3  23    0.25    0.30
  14  -3  24    0.18    0.36
  15  -3  12   14.58    0.51
  15  -3  17    3.22    0.33
  15  -3  18    3.72    0.34
 -23  -4  -4   -0.09    0.45
 -17  -4 -10    0.31    0.29
 -14  -4 -12    0.42    0.25
 -11  -4 -13    0.18    0.24
  -1  -4 -13    0.81    0.23
   5  -4 -10    0.51    0.23
  10  -4  -5    4.14    0.30
  12  -4  -2    1.30    0.33
  14  -4   2    0.63    0.36
  15  -4   5    0.33    0.53
  16  -4  22    2.11    0.38
 -17  -5 -12    4.70    0.32
 -15  -5 -13    0.29    0.31
 -13  -5 -14    4.43    0.29
 -10  -5 -15    0.09    0.25
  -9  -5 -15    6.53    0.28
  -8  -5 -15    0.25    0.22
  -4  -5 -15    0.26    0.23
  -3  -5 -15    3.37    0.27
  -2  -5 -15    0.76    0.20
   1  -5 -14   66.48    0.47
   3  -5 -13    3.60    0.25
   5  -5 -12    1.86    0.19
   6  -5 -11    0.50    0.24
  11  -5  -6    3.03    0.33
  15  -5   1    8.31    0.42
  17  -5   8    3.40    0.73
  18  -5  14    0.21    0.55
  18  -5  15    0.16    0.46
  18  -5  16    0.17    0.47
 -20  -6 -11    8.81    0.43
 -19  -6 -12    0.31    0.36
 -16  -6 -14    0.99    0.30
 -14  -6 -15    0.35    0.28
 -11  -6 -16    0.32    0.26
 -10  -6 -16    7.69    0.27
  -2  -6 -16    4.28    0.26
  -1  -6 -16   -0.17    0.23
   2  -6 -15    2.95    0.24
   4  -6 -14    4.18    0.25
   7  -6 -12    0.23    0.22
   8  -6 -11    9.17    0.29
   9  -6 -10   -0.04    0.22
  10  -6  -9    6.05    0.27
  11  -6  -8   -0.01    0.24
  13  -6  -5    0.24    0.29
  19  -6  15    0.06    0.70
 -16  -7 -15   -0.17    0.32
 -14  -7 -16    0.08    0.29
 -11  -7 -17    0.76    0.28
 -10  -7 -17    0.43    0.26
  -2  -7 -17    0.18    0.25
  -1  -7 -17    3.66    0.25
   2  -7 -16   -0.04    0.23
   4  -7 -15   -0.15    0.25
   7  -7 -13    2.04    0.25
   8  -7 -12    0.60    0.25
  11  -7  -9    1.42    0.30
  12  -7  -8    0.04    0.26
  14  -7  -5    0.46    0.32
  17  -7   1    0.29    0.35
 -13  -8 -17    0.12    0.32
 -10  -8 -18    0.48    0.26
  -9  -8 -18    0.00    0.30
  -8  -8 -18    1.69    0.31
  -7  -8 -18    0.12    0.26
  -6  -8 -18   -0.06    0.26
  -5  -8 -18    0.20    0.25
  -4  -8 -18   -0.01    0.28
  -3  -8 -18   -0.33    0.27
  -2  -8 -18    0.63    0.20
   1  -8 -17    0.06    0.27
   3  -8 -16    0.13    0.27
   5  -8 -15    0.46    0.28
   8  -8 -13    6.38    0.30
   9  -8 -12    0.25    0.28
  10  -8 -11    0.50    0.27
  11  -8 -10   -0.23    0.27
  12  -8  -9    0.67    0.28
  14  -8  -6    4.11    0.35
  -2  -9 -18    0.13    0.26
  -1  -9 -18    0.10    0.30
   2  -9 -17    0.08    0.29
   4  -9 -16    0.20    0.30
   6  -9 -15    0.15    0.28
  13  -9  -8    5.31    0.39
  14  -9  -7    0.52    0.33
  15  -9  -5    2.58    0.37
 -15   1  12    5.44    0.33
 -15   1  13   28.07    0.41
 -15   1  14    1.04    0.26
 -15   1  17   12.64    0.33
 -15   1  18    2.31    0.27
 -15   1  19    0.50    0.28
 -15   1  20    2.89    0.31
 -14   1  10   -0.06    0.26
 -14   1  21    0.44    0.27
 -14   1  22   -0.28    0.27
 -13   1   8    5.95    0.33
 -13   1  23    1.46    0.28
 -13   1  24    6.40    0.33
 -12   1  24   -0.02    0.26
 -12   1  25    0.16    0.24
 -11   1   6   26.13    0.43
 -11   1  25    2.39    0.28
 -11   1  26    0.72    0.29
 -10   1   5    0.82    0.27
 -10   1  26    0.12    0.27
  -9   1  26    2.84    0.28
  -9   1  27    0.23    0.26
  -8   1  27    0.00    0.26
  -7   1  27    6.84    0.29
  -6   1  27    0.24    0.27
  -5   1  27    1.21    0.27
  -4   1  26    0.13    0.24
  -4   1  27    0.19    0.27
  -3   1   5   47.05    0.60
  -3   1  26    1.05    0.26
  -2   1  25    0.09    0.23
  -2   1  26    0.39    0.26
  -1   1  25    0.18    0.25
   0   1  23    0.38    0.17
   0   1  24    0.17    0.25
   1   1   9   64.56    0.55
   1   1  22    6.39    0.28
   1   1  23   34.02    0.37
   2   1  11    0.64    0.25
   2   1  19    0.04    0.18
   2   1  20   -0.11    0.24
   2   1  21   -0.02    0.23
   3   1  15   24.72    0.36
   3   1  16    0.97    0.24
   3   1  17    4.53    0.25
 -20   0  12    2.02    0.32
 -20   0  13    0.29    0.34
 -20   0  14    2.13    0.32
 -20   0  16    2.95    0.30
 -20   0  17    0.03    0.30
 -20   0  18   -0.08    0.35
 -20   0  19    0.31    0.36
 -19   0  22   -0.03    0.33
 -18   0   6    8.36    0.44
 -16   0   3   10.54    0.57
  -2   0  32    0.06    0.31
  -1   0  32   -0.01    0.30
   0   0  31    0.13    0.30
   1   0  30    0.00    0.26
   2   0  30   -0.17    0.26
   3   0  28    0.06    0.24
   3   0  29   -0.08    0.25
   4   0  27    2.85    0.30
   5   0  26    0.04    0.26
   6   0  23    8.14    0.27
   6   0  24    0.00    0.26
   7   0  10    0.28    0.29
   7   0  20    0.13    0.22
   7   0  21   -0.13    0.23
 -23  -1  11    1.04    0.41
 -22  -1   7    0.00    0.41
   5  -1  32   -0.03    0.32
   6  -1  31    0.10    0.33
   7  -1  29    1.40    0.31
   8  -1  27   -0.26    0.29
   8  -1  28   -0.02    0.31
   9  -1  25    9.23    0.33
  10  -1  22    0.22    0.27
  10  -1  23    0.20    0.32
  11  -1  16    1.49    0.31
 -25  -2   8    0.04    0.58
  -7  -2  -9    0.56    0.24
  -6  -2  -9   45.85    0.48
  -5  -2  -9    0.35    0.25
  -1  -2  -8    0.33    0.25
   3  -2  -6    0.86    0.25
  10  -2  29   -0.18    0.32
  11  -2  27    0.03    0.31
  12  -2  24    1.36    0.30
  13  -2  11    0.23    0.31
  13  -2  19    0.30    0.26
  13  -2  20    0.16    0.28
 -15  -3  -9    6.91    0.30
 -13  -3 -10   13.61    0.34
 -10  -3 -11    0.18    0.23
  -9  -3 -11    9.12    0.32
  -3  -3 -11   19.48    0.34
  -2  -3 -11    0.51    0.22
   4  -3  -8    0.47    0.24
  10  -3  -2    0.15    0.25
  14  -3  25    0.36    0.35
  15  -3  11   13.32    0.55
  15  -3  19    0.79    0.31
  15  -3  20    0.99    0.34
 -18  -4  -9    0.48    0.31
 -15  -4 -11   -0.08    0.30
 -13  -4 -12    0.11    0.24
 -10  -4 -13   21.25    0.33
  -9  -4 -13    0.21    0.24
  -3  -4 -13   -0.12    0.23
  -2  -4 -13   15.39    0.30
   1  -4 -12    0.73    0.24
   3  -4 -11    0.34    0.24
   6  -4  -9   13.03    0.31
   7  -4  -8    1.09    0.26
   8  -4  -7   13.64    0.36
   9  -4  -6    0.22    0.22
  13  -4   0    1.56    0.35
  16  -4  23    3.47    0.41
 -23  -5  -6    4.66    0.46
 -19  -5 -10    1.33    0.33
 -18  -5 -11    0.11    0.28
 -12  -5 -14   -0.11    0.24
  -7  -5 -15    7.61    0.28
  -6  -5 -15    1.28    0.25
  -5  -5 -15   13.53    0.29
   0  -5 -14   -0.53    0.25
   2  -5 -13    0.30    0.24
   4  -5 -12    0.82    0.24
   7  -5 -10    0.17    0.24
   8  -5  -9    0.21    0.23
   9  -5  -8    5.25    0.27
  10  -5  -7    0.15    0.24
  14  -5  -1    3.12    0.32
  16  -5   4    0.10    0.40
  18  -5  13    0.08    0.61
  18  -5  17    0.16    0.46
  18  -5  18    0.04    0.45
 -21  -6 -10    0.02    0.37
 -17  -6 -13    0.38    0.29
 -15  -6 -14   -0.30    0.27
 -13  -6 -15    0.38    0.28
  -9  -6 -16    0.63    0.25
  -8  -6 -16    0.23    0.25
  -7  -6 -16   -0.09    0.24
  -6  -6 -16    2.11    0.26
  -5  -6 -16    0.01    0.24
  -4  -6 -16    1.28    0.24
  -3  -6 -16    0.00    0.23
   0  -6 -15    0.48    0.23
   1  -6 -15    0.04    0.17
   3  -6 -14    0.20    0.24
   5  -6 -13    0.04    0.23
   6  -6 -12   19.45    0.33
  12  -6  -6    7.75    0.34
  16  -6   1   12.98    0.45
  17  -6   4    0.30    0.41
  18  -6   8    0.27    0.58
 -17  -7 -14   -0.05    0.33
 -15  -7 -15    3.53    0.33
 -13  -7 -16    0.39    0.30
 -12  -7 -16   -0.15    0.30
  -9  -7 -17    0.57    0.28
  -8  -7 -17    0.29    0.27
  -7  -7 -17    3.88    0.28
  -6  -7 -17    0.12    0.27
  -5  -7 -17    0.23    0.26
  -4  -7 -17    0.09    0.27
  -3  -7 -17    3.23    0.25
   0  -7 -16   -0.21    0.26
   1  -7 -16    1.70    0.20
   3  -7 -15    6.87    0.28
   5  -7 -14    4.01    0.25
   6  -7 -13    0.85    0.23
   9  -7 -11    5.75    0.27
  10  -7 -10   -0.01    0.25
  13  -7  -6    7.20    0.33
  16  -7  -1    0.09    0.33
 -14  -8 -16    0.01    0.34
 -12  -8 -17    0.53    0.33
 -11  -8 -17    0.12    0.28
  -1  -8 -17    0.28    0.27
   0  -8 -17    2.12    0.27
   2  -8 -16    0.53    0.27
   4  -8 -15    0.32    0.26
   6  -8 -14    1.51    0.27
   7  -8 -13    0.52    0.29
  13  -8  -7    0.79    0.31
  15  -8  -4    0.10    0.35
  17  -8   0    0.02    0.37
  18  -8   3    0.44    0.43
  -8  -9 -18    0.13    0.32
  -7  -9 -18    3.14    0.33
  -6  -9 -18    0.25    0.31
  -5  -9 -18    1.86    0.31
  -4  -9 -18   -0.15    0.30
  -3  -9 -18    0.81    0.31
   0  -9 -17    0.19    0.25
   1  -9 -17    2.32    0.30
   3  -9 -16    2.18    0.30
   5  -9 -15    0.95    0.29
   8  -9 -13    0.23    0.30
   9  -9 -12    1.13    0.30
  10  -9 -11    0.18    0.32
  11  -9 -10    8.80    0.39
  12  -9  -9    0.18    0.33
   5 -10 -15    0.55    0.27
   7 -10 -14   -0.33    0.33
   8 -10 -13    0.09    0.33
 -16   1  14    0.09    0.31
 -16   1  15    0.35    0.29
 -16   1  16   -0.21    0.26
 -16   1  17    0.25    0.26
 -16   1  18    0.23    0.31
 -16   1  19   -0.03    0.29
 -15   1  11   24.83    0.40
 -15   1  21    7.52    0.31
 -15   1  22    1.01    0.29
 -14   1   9   -0.04    0.26
 -14   1  23    0.20    0.29
 -14   1  24    0.37    0.29
 -13   1   7   11.64    0.37
 -13   1  25    0.05    0.30
 -12   1   6    0.30    0.26
 -12   1  26   -0.07    0.29
 -11   1  27    0.79    0.28
 -10   1  27   -0.16    0.28
 -10   1  28    0.35    0.30
  -9   1  28    0.71    0.29
  -8   1   4    0.16    0.28
  -8   1  28    0.12    0.28
  -7   1   4   31.03    0.52
  -7   1  28    7.38    0.31
  -6   1   4    0.29    0.23
  -6   1  28   -0.09    0.28
  -5   1   4   31.29    0.52
  -5   1  28    5.18    0.30
  -4   1  28    0.52    0.27
  -3   1  27   -0.06    0.23
  -3   1  28    0.40    0.24
  -2   1  27    0.54    0.26
  -1   1   6   12.54    0.38
  -1   1  26    1.79    0.26
   0   1   7    0.06    0.27
   0   1  25    0.06    0.25
   0   1  26   -0.07    0.25
   1   1   8   13.25    0.33
   1   1  24   10.87    0.30
   2   1  10    0.52    0.24
   2   1  22    0.00    0.25
   2   1  23    0.40    0.25
   3   1  12   22.50    0.36
   3   1  13   89.49    0.57
   3   1  14   78.83    0.51
   3   1  18    4.96    0.25
   3   1  19   19.09    0.32
   3   1  20   41.46    0.40
 -20   0  11    0.28    0.31
 -20   0  20    0.06    0.32
 -20   0  21    0.54    0.35
 -19   0   8    0.13    0.29
  -1   0  33    0.04    0.32
   0   0  32    0.44    0.31
   1   0  31    0.10    0.26
   1   0  32    0.03    0.33
   2   0  31    0.61    0.29
   3   0  30    0.18    0.28
   4   0  28    0.35    0.25
   4   0  29    2.11    0.27
   5   0   5    0.42    0.29
   5   0  27    0.07    0.26
   6   0   7  255.77    1.27
   6   0  25    2.49    0.26
   7   0  22    0.08    0.25
   7   0  23    0.20    0.25
   8   0  14   26.13    0.41
   8   0  15    1.45    0.25
   8   0  16   48.72    0.46
   8   0  17   20.48    0.34
   8   0  18    3.40    0.25
   8   0  19   19.17    0.36
 -23  -1  10    0.41    0.41
  -2  -1  -5    0.14    0.30
   7  -1  30    0.03    0.31
   8  -1  29   -0.13    0.30
   9  -1  26    2.33    0.29
   9  -1  27    0.14    0.30
  10  -1  24    0.19    0.28
  11  -1  13   22.69    0.44
  11  -1  14   22.99    0.41
  11  -1  15   10.54    0.33
  11  -1  17    6.10    0.29
  11  -1  18    3.58    0.29
  11  -1  19    4.70    0.31
  11  -1  20    5.93    0.32
 -15  -2  -6    0.17    0.29
 -13  -2  -7   -0.08    0.28
 -11  -2  -8    0.26    0.24
   1  -2  -7    0.68    0.25
   8  -2  -1   68.10    0.82
  11  -2  28    0.06    0.32
  12  -2  25    1.33    0.30
  12  -2  26    2.96    0.36
  13  -2  10    0.24    0.35
  13  -2  21    0.00    0.28
  13  -2  22   -0.18    0.34
 -16  -3  -8    0.13    0.29
 -12  -3 -10   -0.14    0.29
  -8  -3 -11    0.02    0.25
  -7  -3 -11    2.60    0.25
  -6  -3 -11    0.24    0.24
  -5  -3 -11   31.86    0.39
  -4  -3 -11   -0.04    0.23
   0  -3 -10    0.42    0.24
   2  -3  -9    0.70    0.25
   5  -3  -7   56.96    0.55
  14  -3  26   -0.11    0.37
  15  -3  21    0.44    0.33
  15  -3  22    1.77    0.34
 -22  -4  -5    3.46    0.39
 -21  -4  -6    0.18    0.37
 -20  -4  -7    0.38    0.33
 -19  -4  -8    0.09    0.32
 -16  -4 -10    6.98    0.33
 -12  -4 -12   13.28    0.32
  -8  -4 -13    2.33    0.24
  -7  -4 -13   -0.03    0.24
  -6  -4 -13    5.32    0.26
  -5  -4 -13   -0.12    0.24
  -4  -4 -13    2.13    0.23
   0  -4 -12   11.17    0.29
   2  -4 -11    8.52    0.28
   4  -4 -10    2.62    0.25
  17  -4  16    0.28    0.38
  17  -4  17    0.31    0.40
 -22  -5  -7   -0.01    0.38
 -21  -5  -8    0.28    0.36
 -20  -5  -9    0.04    0.32
 -16  -5 -12   -0.08    0.27
 -14  -5 -13    0.04    0.27
 -11  -5 -14   -0.01    0.25
 -10  -5 -14   -0.13    0.23
  -2  -5 -14    1.47    0.26
  -1  -5 -14   66.68    0.44
   1  -5 -13   11.40    0.29
   5  -5 -11    4.58    0.26
  18  -5  19    0.33    0.44
 -18  -6 -12    2.10    0.32
 -16  -6 -13    1.49    0.34
 -14  -6 -14    0.76    0.31
 -12  -6 -15    5.79    0.29
 -11  -6 -15    0.54    0.25
  -1  -6 -15    0.17    0.24
   2  -6 -14    3.61    0.27
   4  -6 -13    2.08    0.26
   7  -6 -11    0.17    0.24
   8  -6 -10   27.41    0.35
  11  -6  -7    0.30    0.29
  15  -6  -1    0.12    0.29
 -18  -7 -13    0.24    0.34
 -16  -7 -14    0.50    0.34
 -14  -7 -15    0.04    0.29
 -11  -7 -16    0.44    0.26
  -2  -7 -16    0.04    0.23
  -1  -7 -16    2.33    0.26
   2  -7 -15    0.59    0.25
   4  -7 -14    0.87    0.26
   7  -7 -12    0.53    0.25
  12  -7  -7    0.23    0.30
  17  -7   2    1.78    0.39
  18  -7   5    0.14    0.41
 -13  -8 -16   -0.29    0.31
 -10  -8 -17    0.86    0.29
  -9  -8 -17    0.47    0.28
  -8  -8 -17    2.89    0.27
  -5  -8 -17    0.29    0.25
  -4  -8 -17    0.98    0.28
  -3  -8 -17    0.00    0.28
  -2  -8 -17    1.50    0.25
   1  -8 -16    0.39    0.27
   3  -8 -15    0.16    0.25
   5  -8 -14    0.47    0.26
   8  -8 -12    0.96    0.28
   9  -8 -11    0.07    0.27
  10  -8 -10    1.35    0.30
  11  -8  -9    0.09    0.31
  12  -8  -8    0.28    0.27
  14  -8  -5    1.28    0.34
  -2  -9 -17   -0.17    0.26
  -1  -9 -17    1.76    0.30
   2  -9 -16    0.02    0.30
   4  -9 -15   -0.30    0.29
   6  -9 -14    0.09    0.27
   7  -9 -13    0.43    0.26
  13  -9  -7    2.56    0.37
  14  -9  -6    0.14    0.33
  15  -9  -4    0.43    0.36
   2 -10 -16    0.52    0.33
   6 -10 -14    0.79    0.33
   9 -10 -12    0.05    0.27
  10 -10 -11    0.57    0.33
 -16   1  12    0.40    0.29
 -16   1  13    0.22    0.24
 -16   1  20   -0.05    0.27
 -16   1  21   -0.15    0.27
 -16   1  22    0.08    0.31
 -15   1  10   10.60    0.33
 -15   1  23    0.15    0.28
 -15   1  24    7.11    0.33
 -14   1   8   -0.03    0.31
 -14   1  25   -0.27    0.30
 -13   1  26    4.60    0.32
 -13   1  27    0.02    0.27
 -12   1  27    0.06    0.30
 -12   1  28   -0.03    0.27
 -11   1   5   40.08    0.57
 -11   1  28    0.66    0.29
 -10   1  29   -0.18    0.29
  -9   1   4   23.60    0.49
  -9   1  29    0.42    0.30
  -8   1  29    0.10    0.30
  -7   1  29    1.67    0.28
  -7   1  30    0.33    0.28
  -6   1  29    0.02    0.26
  -6   1  30    0.01    0.25
  -5   1  29    1.52    0.27
  -5   1  30    4.08    0.28
  -4   1   4    0.09    0.27
  -4   1  29    0.26    0.28
  -3   1  29    6.84    0.29
  -2   1   5    0.09    0.21
  -2   1  28    0.13    0.27
  -1   1  27    1.25    0.19
  -1   1  28    2.21    0.28
   0   1  27    0.11    0.26
   1   1  25   -0.32    0.24
   1   1  26    1.72    0.26
   2   1   9    0.10    0.24
   2   1  24    0.23    0.25
   2   1  25    0.01    0.23
   3   1  11   50.07    0.48
   3   1  21    2.12    0.25
   3   1  22    1.35    0.25
   3   1  23    1.77    0.24
   4   1  14    0.73    0.23
   4   1  15   -0.05    0.24
   4   1  16    0.09    0.24
   4   1  17    0.42    0.23
   4   1  18    0.19    0.24
   4   1  19    0.54    0.25
 -21   0  15    0.03    0.33
 -21   0  16    0.26    0.36
 -21   0  17   -0.01    0.35
 -21   0  18   -0.04    0.33
 -21   0  19    0.04    0.37
 -20   0  10    2.29    0.33
 -17   0   4    0.24    0.37
   0   0  33    0.30    0.32
   1   0  33    0.06    0.29
   2   0  32    0.36    0.31
   3   0  31   -0.09    0.30
   4   0  30    0.55    0.29
   5   0  28    0.08    0.27
   6   0  26    2.43    0.26
   6   0  27    7.49    0.28
   7   0   9    0.14    0.25
   7   0  24    0.11    0.25
   7   0  25    0.18    0.27
   8   0  12    0.99    0.30
   8   0  13    5.94    0.28
   8   0  20    2.63    0.24
   8   0  21   21.34    0.33
 -23  -1   9    2.46    0.44
 -10  -1  -5    0.72    0.27
   2  -1  -3    0.27    0.28
   7  -1  31    1.77    0.33
   8  -1  30    0.14    0.33
   9  -1  28    0.77    0.29
  10  -1   8    0.44    0.26
  10  -1  25    0.26    0.27
  11  -1  12    4.23    0.33
  11  -1  21   19.66    0.35
  11  -1  22    2.76    0.31
 -16  -2  -5    0.49    0.31
 -10  -2  -8   18.33    0.37
  -2  -2  -8   86.50    0.62
   4  -2  -5   23.09    0.42
   5  -2  -4    0.39    0.27
  11  -2  29   -0.17    0.33
  12  -2  27   10.66    0.42
  13  -2  23    0.26    0.29
 -22  -3  -2    0.05    0.43
 -17  -3  -7    2.00    0.30
 -14  -3  -9    0.19    0.24
 -11  -3 -10   18.14    0.37
  -1  -3 -10   29.51    0.38
   6  -3  -6    0.76    0.25
   7  -3  -5   14.66    0.38
  11  -3   0    1.24    0.32
  12  -3   2    0.16    0.39
  15  -3  10   14.88    0.65
  15  -3  23    1.92    0.37
 -24  -4  -2    4.66    0.53
 -14  -4 -11    2.70    0.26
 -11  -4 -12    0.53    0.24
  -1  -4 -12    0.36    0.23
   5  -4  -9    0.39    0.24
  17  -4  14    0.14    0.44
  17  -4  15   -0.01    0.41
  17  -4  18   -0.13    0.38
  17  -4  19    0.15    0.38
 -17  -5 -11    2.75    0.30
 -15  -5 -12    4.27    0.30
 -13  -5 -13    0.84    0.26
  -9  -5 -14    3.96    0.25
  -8  -5 -14    0.08    0.24
  -7  -5 -14    1.55    0.25
  -6  -5 -14    0.39    0.24
  -5  -5 -14   14.28    0.30
  -4  -5 -14    0.66    0.26
  -3  -5 -14    1.17    0.25
   0  -5 -13    0.08    0.25
   3  -5 -12   29.86    0.36
   6  -5 -10    0.92    0.24
  11  -5  -5   20.94    0.43
  13  -5  -2   21.48    0.43
 -20  -6 -10    0.20    0.39
 -19  -6 -11   -0.04    0.33
 -13  -6 -14   -0.06    0.28
 -10  -6 -15    8.96    0.29
  -9  -6 -15    0.20    0.25
  -4  -6 -15    8.77    0.27
  -3  -6 -15    0.66    0.24
  -2  -6 -15    2.71    0.24
   1  -6 -14    0.42    0.25
   3  -6 -13    0.57    0.25
   5  -6 -12    0.28    0.25
   9  -6  -9    0.82    0.24
  10  -6  -8   15.97    0.32
 -17  -7 -13   -0.21    0.37
 -13  -7 -15    2.94    0.31
 -10  -7 -16   -0.14    0.25
  -9  -7 -16    1.21    0.27
  -8  -7 -16    0.23    0.27
  -7  -7 -16    4.16    0.27
  -6  -7 -16    0.07    0.23
  -5  -7 -16    2.50    0.25
  -4  -7 -16    0.21    0.27
  -3  -7 -16    2.64    0.27
   1  -7 -15   27.40    0.36
   3  -7 -14    9.39    0.29
   5  -7 -13   10.92    0.30
   8  -7 -11    0.59    0.24
   9  -7 -10    3.13    0.28
  10  -7  -9    0.24    0.27
  11  -7  -8    2.86    0.27
  14  -7  -4    0.35    0.26
  16  -7   0   -0.05    0.35
  19  -7  10    0.75    0.69
 -12  -8 -16    1.12    0.33
  -7  -8 -17    0.17    0.27
  -6  -8 -17    1.02    0.26
  -1  -8 -16   -0.14    0.26
   0  -8 -16    0.62    0.27
   2  -8 -15   -0.15    0.26
   4  -8 -14    1.16    0.25
   6  -8 -13   12.07    0.31
  13  -8  -6    0.93    0.34
  17  -8   1    0.20    0.36
  -9  -9 -17    1.08    0.32
  -8  -9 -17    0.12    0.32
  -7  -9 -17    0.47    0.31
  -6  -9 -17    0.02    0.28
  -5  -9 -17    0.37    0.30
  -4  -9 -17   -0.06    0.30
  -3  -9 -17   -0.79    0.30
   0  -9 -16    0.20    0.26
   1  -9 -16    0.29    0.28
   3  -9 -15    0.68    0.28
   5  -9 -14    3.54    0.31
   8  -9 -12   -0.13    0.29
   9  -9 -11    0.20    0.29
  10  -9 -10    0.21    0.30
  11  -9  -9    1.31    0.32
  12  -9  -8    0.83    0.33
   1 -10 -16    0.02    0.32
   3 -10 -15    0.43    0.28
   5 -10 -14    0.30    0.30
   7 -10 -13    0.13    0.32
   8 -10 -12    1.89    0.32
   9 -10 -11    0.23    0.33
  -8   2  15   11.65    0.29
  -8   2  16    4.04    0.25
  -8   2  17    4.62    0.26
  -8   2  18   33.77    0.38
  -8   2  19    2.66    0.25
  -7   2  15    0.05    0.23
  -7   2  16    0.27    0.24
  -7   2  17    0.59    0.24
  -7   2  18    0.25    0.25
  -7   2  19    0.22    0.25
  -7   2  20    0.17    0.22
  -6   2  15   24.41    0.35
  -6   2  16    6.53    0.27
  -6   2  17   18.74    0.32
  -6   2  18   24.40    0.34
  -6   2  19   12.42    0.29
  -6   2  20    3.45    0.26
  -5   2  15    0.19    0.24
  -5   2  16   -0.07    0.23
  -5   2  17    0.81    0.25
  -5   2  18    0.81    0.25
  -5   2  19   -0.01    0.24
  -5   2  20    0.19    0.23
  -4   2  17   29.75    0.36
  -4   2  18   62.04    0.45
 -17   1  14    3.16    0.31
 -17   1  15    9.20    0.31
 -17   1  16    6.61    0.30
 -17   1  17    0.48    0.27
 -17   1  18    5.55    0.31
 -17   1  19    1.35    0.28
 -17   1  20   -0.05    0.29
 -17   1  21    0.47    0.32
 -16   1  11    0.11    0.27
 -16   1  23    0.05    0.29
 -16   1  24    0.09    0.33
 -15   1   9   10.10    0.36
 -15   1  25    0.77    0.30
 -15   1  26    0.12    0.32
 -14   1  26    0.16    0.28
 -14   1  27    0.27    0.32
 -13   1  28    3.08    0.33
 -12   1  29   -0.21    0.32
 -11   1  29    0.51    0.28
 -10   1  30    0.14    0.31
  -9   1  30    0.56    0.32
  -8   1  30    0.04    0.23
  -8   1  31    0.00    0.29
  -7   1  31    0.77    0.32
  -6   1  31    0.36    0.30
  -5   1  31    4.52    0.32
  -4   1  30    0.51    0.27
  -4   1  31    0.15    0.28
  -3   1  30    0.35    0.29
  -2   1  29   -0.06    0.21
  -2   1  30   -0.10    0.29
  -1   1  29    2.59    0.29
   0   1   6    0.12    0.28
   0   1  28    0.37    0.27
   1   1   7   79.98    0.66
   1   1  27    1.92    0.27
   2   1  26    0.27    0.25
   3   1  10   46.08    0.48
   3   1  24    5.28    0.27
   4   1  13    0.37    0.24
   4   1  20    0.19    0.23
   4   1  21    0.22    0.25
   4   1  22    0.23    0.24
 -21   0  13    0.10    0.35
 -21   0  14    0.06    0.33
 -20   0   9    3.44    0.37
 -19   0   7    0.34    0.37
   2   0  33    6.78    0.36
   3   0  32    0.05    0.31
   4   0  31    2.22    0.30
   5   0  29   -0.20    0.24
   5   0  30    0.14    0.26
   6   0  28   -0.26    0.27
   7   0  26   -0.10    0.25
   8   0  11    2.09    0.29
   8   0  22    2.58    0.26
   8   0  23    3.18    0.27
 -22  -1   6   -0.12    0.51
 -14  -1  -3    0.17    0.35
 -12  -1  -4    0.29    0.30
  -9  -1  -5   69.45    0.74
  -3  -1  -5   47.29    0.61
   0  -1  -4    0.16    0.29
   8  -1  31   -0.11    0.28
   9  -1  29    0.17    0.30
  10  -1  26    0.12    0.28
  10  -1  27    0.06    0.32
  11  -1  11    0.93    0.29
  11  -1  23    8.07    0.32
 -12  -2  -7    1.41    0.29
  -9  -2  -8    0.23    0.24
  -4  -2  -8   47.10    0.49
  -3  -2  -8    0.57    0.25
   0  -2  -7    5.63    0.30
   2  -2  -6  152.18    0.84
  12  -2  28    0.94    0.33
  13  -2  24   -0.16    0.29
  13  -2  25    0.44    0.31
  14  -2  16   11.14    0.40
  14  -2  17    1.56    0.30
  14  -2  18    0.14    0.29
 -21  -3  -3    2.33    0.41
 -18  -3  -6    0.22    0.31
 -15  -3  -8   11.75    0.35
 -13  -3  -9    4.14    0.33
 -10  -3 -10    0.11    0.24
  -2  -3 -10    0.21    0.23
   1  -3  -9  111.91    0.64
   3  -3  -8   19.22    0.35
  15  -3  24    6.20    0.39
 -17  -4  -9    0.19    0.26
 -15  -4 -10    0.09    0.28
 -13  -4 -11    0.28    0.24
 -10  -4 -12   11.01    0.29
  -9  -4 -12    0.16    0.24
  -3  -4 -12    0.31    0.24
  -2  -4 -12   17.91    0.27
   1  -4 -11    0.05    0.23
   3  -4 -10    0.32    0.24
   6  -4  -8   28.12    0.38
   7  -4  -7    0.98    0.28
   9  -4  -5    0.71    0.28
  12  -4  -1    2.65    0.34
  17  -4  13    0.09    0.47
  17  -4  20   -0.01    0.38
  17  -4  21    0.05    0.39
 -19  -5  -9    0.32    0.32
 -18  -5 -10    0.04    0.27
 -16  -5 -11    0.44    0.30
 -14  -5 -12    0.17    0.30
 -12  -5 -13   -0.42    0.25
 -11  -5 -13    2.69    0.28
  -1  -5 -13   11.38    0.30
   2  -5 -12    0.69    0.25
   4  -5 -11    0.77    0.24
   7  -5  -9   10.55    0.30
   8  -5  -8    0.32    0.24
   9  -5  -7    3.50    0.26
  10  -5  -6    0.33    0.25
  14  -5   0    1.03    0.32
  15  -5   2    4.94    0.40
 -21  -6  -9   -0.01    0.33
 -17  -6 -12   -0.07    0.29
 -15  -6 -13   -0.12    0.27
 -12  -6 -14    2.34    0.27
  -8  -6 -15    3.75    0.25
  -7  -6 -15   -0.10    0.25
  -6  -6 -15    3.29    0.27
  -5  -6 -15   -0.03    0.26
   0  -6 -14    7.29    0.28
   2  -6 -13    8.77    0.27
   4  -6 -12    4.56    0.25
   6  -6 -11    4.93    0.26
   7  -6 -10    0.52    0.27
  12  -6  -5   22.85    0.42
  16  -6   2    3.22    0.37
 -18  -7 -12    0.29    0.37
 -15  -7 -14    0.20    0.29
 -12  -7 -15   -0.31    0.28
 -11  -7 -15    5.11    0.31
  -1  -7 -15   25.53    0.34
   0  -7 -15    0.31    0.24
   2  -7 -14    0.78    0.25
   4  -7 -13    0.42    0.25
   6  -7 -12    0.66    0.25
   7  -7 -11   15.33    0.30
  13  -7  -5    5.54    0.29
 -14  -8 -15    0.61    0.31
 -13  -8 -15   -0.34    0.32
 -11  -8 -16    0.17    0.28
 -10  -8 -16    3.86    0.30
  -9  -8 -16    0.14    0.26
  -4  -8 -16    0.62    0.25
  -3  -8 -16    0.12    0.27
  -2  -8 -16    0.37    0.26
   1  -8 -15   -0.17    0.27
   5  -8 -13   -0.19    0.26
   7  -8 -12   -0.10    0.26
   8  -8 -11    2.24    0.27
   9  -8 -10   -0.07    0.28
  11  -8  -8    0.42    0.31
  12  -8  -7    7.86    0.32
  16  -8  -1    1.14    0.33
  18  -8   4    3.52    0.47
  -1  -9 -16    1.05    0.28
   2  -9 -15   -0.11    0.28
   4  -9 -14    0.66    0.28
   6  -9 -13    0.28    0.27
   7  -9 -12    1.58    0.30
  14  -9  -5   -0.27    0.32
  -1 -10 -16    0.20    0.31
   0 -10 -16    0.51    0.28
   2 -10 -15    0.88    0.32
   4 -10 -14    2.48    0.29
   6 -10 -13    1.56    0.31
  10 -10 -10    0.30    0.32
  11 -10  -9    0.55    0.33
 -10   2  15    4.79    0.25
 -10   2  16   25.67    0.35
 -10   2  17   12.31    0.30
 -10   2  18    0.89    0.25
 -10   2  19   19.63    0.34
 -10   2  20    1.09    0.25
 -10   2  21    0.76    0.22
  -9   2  14    0.29    0.25
  -9   2  15   -0.04    0.24
  -9   2  16    0.34    0.25
  -9   2  17    1.00    0.22
  -9   2  18    0.77    0.23
  -9   2  19    0.57    0.25
  -9   2  20    0.06    0.25
  -9   2  21    0.06    0.24
  -9   2  22   -0.03    0.25
  -8   2  13   10.25    0.30
  -8   2  14   15.09    0.32
  -8   2  20    3.20    0.23
  -8   2  21    0.54    0.25
  -8   2  22    5.58    0.27
  -8   2  23    1.29    0.24
  -7   2  13    0.01    0.24
  -7   2  14    0.09    0.23
  -7   2  21    0.10    0.24
  -7   2  22    0.07    0.25
  -7   2  23    0.02    0.25
  -6   2  13    9.07    0.28
  -6   2  14    1.09    0.23
  -6   2  21    5.71    0.25
  -6   2  22    1.45    0.25
  -6   2  23    7.34    0.29
  -5   2  13    0.24    0.24
  -5   2  14    0.07    0.24
  -5   2  21    0.27    0.24
  -5   2  22    0.51    0.24
  -5   2  23    0.23    0.23
  -4   2  14   17.82    0.32
  -4   2  15    5.08    0.26
  -4   2  16    5.48    0.20
  -4   2  19   13.35    0.25
  -4   2  20    3.41    0.25
  -4   2  21    4.02    0.26
  -4   2  22    9.26    0.28
  -3   2  15    0.78    0.24
  -3   2  16   -0.03    0.24
  -3   2  17    0.80    0.25
  -3   2  18    0.37    0.24
  -3   2  19    0.14    0.24
  -3   2  20   -0.07    0.25
  -3   2  21    0.17    0.25
  -2   2  17    4.06    0.26
  -2   2  18   15.39    0.31
  -2   2  19   14.85    0.29
 -18   1  17    0.08    0.33
 -18   1  18    0.14    0.34
 -18   1  19    0.32    0.34
 -17   1  12    0.59    0.29
 -17   1  13    5.38    0.29
 -17   1  22    0.79    0.33
 -17   1  23    4.21    0.34
 -17   1  24    3.08    0.38
 -16   1  10    0.15    0.28
 -16   1  25    0.34    0.33
 -16   1  26    0.21    0.33
 -15   1   8    8.96    0.36
 -14   1   7    0.22    0.30
 -13   1   6    1.82    0.29
 -12   1   5    0.33    0.30
 -10   1   4    1.00    0.28
  -6   1  32   -0.17    0.32
  -5   1  32   -0.13    0.30
  -4   1  32   -0.32    0.32
  -3   1   4   22.39    0.50
  -3   1  31   -0.18    0.29
  -2   1  31   -0.09    0.31
  -1   1   5   23.39    0.48
  -1   1  30    1.54    0.29
   0   1  29    0.20    0.25
   0   1  30    0.30    0.26
   1   1  28    2.75    0.26
   1   1  29    2.75    0.29
   2   1   8    0.42    0.25
   2   1  27    0.19    0.26
   2   1  28   -0.07    0.24
   3   1  25    5.70    0.21
   3   1  26    1.01    0.27
   4   1  11    0.67    0.24
   4   1  12    0.29    0.23
   4   1  23    0.09    0.25
   4   1  24    0.08    0.25
   5   1  15    9.57    0.29
   5   1  16   33.95    0.40
   5   1  17    1.35    0.25
   5   1  18   36.74    0.39
   5   1  19   33.83    0.38
   5   1  20    1.85    0.26
   5   1  21    0.45    0.22
 -21   0  12    0.07    0.34
 -18   0   5    0.86    0.37
   4   0  32    0.00    0.30
   5   0  31   -0.22    0.29
   6   0   6    4.63    0.33
   6   0  29    0.08    0.28
   7   0   8    0.66    0.24
   7   0  27    0.08    0.27
   8   0  24    2.85    0.27
   8   0  25    2.41    0.27
   9   0  15    0.99    0.28
   9   0  16    2.79    0.26
   9   0  17    0.60    0.24
   9   0  18    0.35    0.23
   9   0  19    0.06    0.23
   9   0  20    0.03    0.23
   9   0  21    0.74    0.27
 -24  -1  12    0.40    0.43
 -23  -1   8    6.67    0.55
  -4  -1  -5    0.20    0.31
   9  -1   5   69.78    1.11
   9  -1  30    0.85    0.30
  10  -1  28    0.01    0.29
  11  -1  24    7.12    0.31
  11  -1  25    2.52    0.28
  12  -1  16    0.24    0.28
  12  -1  17    0.28    0.28
  12  -1  18    0.05    0.28
  12  -1  19    0.12    0.29
 -20  -2  -1    0.76    0.45
 -17  -2  -4    0.12    0.31
 -14  -2  -6    2.57    0.32
  -8  -2  -8    2.99    0.27
  -7  -2  -8    0.39    0.24
  -6  -2  -8   32.36    0.43
  -5  -2  -8    0.61    0.25
  12  -2   6    5.49    0.68
  13  -2   9    0.15    0.38
  13  -2  26    0.00    0.31
  14  -2  14    3.53    0.33
  14  -2  15   23.17    0.46
  14  -2  19    3.19    0.29
  14  -2  20    3.14    0.32
  14  -2  21    1.85    0.33
 -20  -3  -4   -0.01    0.33
 -19  -3  -5    5.59    0.36
  -9  -3 -10    1.47    0.25
  -8  -3 -10   -0.25    0.27
  -4  -3 -10    0.20    0.24
  -3  -3 -10   39.11    0.42
   0  -3  -9    1.14    0.24
   4  -3  -7    1.46    0.26
  15  -3  25    0.46    0.33
 -23  -4  -3    0.16    0.42
 -19  -4  -7    0.09    0.30
 -18  -4  -8    0.85    0.31
 -12  -4 -11   19.56    0.35
  -8  -4 -12    0.20    0.24
  -7  -4 -12    0.64    0.24
  -6  -4 -12    0.59    0.24
  -5  -4 -12    0.10    0.24
  -4  -4 -12    7.20    0.26
   0  -4 -11   60.40    0.47
   2  -4 -10    0.51    0.23
   4  -4  -9    2.28    0.25
   8  -4  -6    7.46    0.29
  14  -4   3   16.11    0.56
  17  -4  22    0.01    0.39
 -23  -5  -5    1.29    0.41
 -22  -5  -6    0.23    0.34
 -21  -5  -7    2.68    0.35
 -20  -5  -8    0.14    0.34
 -10  -5 -13    0.22    0.23
  -3  -5 -13    3.13    0.25
  -2  -5 -13    0.39    0.24
   1  -5 -12   20.35    0.34
   3  -5 -11   29.45    0.36
   5  -5 -10    2.98    0.25
 -19  -6 -10   -0.13    0.34
 -18  -6 -11    3.49    0.31
 -16  -6 -12    0.02    0.29
 -14  -6 -13    0.73    0.27
 -11  -6 -14    0.19    0.25
 -10  -6 -14    4.24    0.25
  -2  -6 -14    4.29    0.26
  -1  -6 -14    0.23    0.23
   8  -6  -9    4.89    0.26
   9  -6  -8    0.61    0.23
  10  -6  -7   10.21    0.30
  11  -6  -6    0.02    0.25
  15  -6   0    0.95    0.32
  17  -6   5    0.10    0.39
 -19  -7 -11    0.40    0.38
 -16  -7 -13   -0.07    0.32
 -14  -7 -14    0.25    0.28
 -13  -7 -14    2.10    0.32
 -10  -7 -15    0.11    0.27
  -9  -7 -15    1.07    0.24
  -3  -7 -15    6.42    0.28
  -2  -7 -15    0.85    0.25
   1  -7 -14    3.95    0.27
   3  -7 -13    2.95    0.24
   5  -7 -12    6.97    0.28
   8  -7 -10    0.03    0.24
   9  -7  -9   15.12    0.34
  10  -7  -8    1.18    0.31
  11  -7  -7    5.89    0.29
  12  -7  -6    0.18    0.25
  17  -7   3    0.38    0.38
  18  -7   6   -0.01    0.42
 -15  -8 -14    0.09    0.33
 -12  -8 -15    1.33    0.31
  -8  -8 -16    3.33    0.28
  -7  -8 -16    0.47    0.27
  -6  -8 -16    5.62    0.30
  -5  -8 -16    0.46    0.28
   0  -8 -15    0.08    0.27
   3  -8 -14   -0.11    0.24
   6  -8 -12    5.56    0.28
  10  -8  -9    0.40    0.28
  14  -8  -4    6.79    0.34
  17  -8   2    0.13    0.40
 -10  -9 -16   -0.01    0.31
  -9  -9 -16    0.04    0.30
  -8  -9 -16    0.36    0.31
  -7  -9 -16    1.19    0.28
  -6  -9 -16    0.35    0.27
  -5  -9 -16    5.27    0.29
  -4  -9 -16    0.06    0.29
  -3  -9 -16    2.93    0.30
  -2  -9 -16   -0.01    0.26
   1  -9 -15    0.05    0.28
   3  -9 -14    0.44    0.28
   5  -9 -13    3.25    0.29
   8  -9 -11    0.16    0.30
   9  -9 -10   -0.01    0.29
  10  -9  -9   -0.12    0.30
  11  -9  -8    4.53    0.34
  12  -9  -7    0.11    0.32
  13  -9  -6    2.53    0.31
  15  -9  -3    0.24    0.31
  -4 -10 -16   -0.20    0.32
  -3 -10 -16    0.58    0.31
  -2 -10 -16    0.63    0.28
   1 -10 -15    0.27    0.31
   3 -10 -14    0.19    0.28
   5 -10 -13    0.52    0.30
   7 -10 -12   -0.30    0.33
   8 -10 -11    0.37    0.32
   9 -10 -10   -0.35    0.33
  11 -10  -8    0.11    0.34
  12 -10  -7    1.60    0.38
 -12   2  17    4.64    0.28
 -12   2  18    6.09    0.28
 -12   2  19    0.96    0.24
 -12   2  20    2.31    0.28
 -11   2  14    0.19    0.26
 -11   2  15   -0.11    0.23
 -11   2  16    0.28    0.24
 -11   2  17   -0.12    0.22
 -11   2  18    0.34    0.24
 -11   2  19    0.05    0.25
 -11   2  20    0.30    0.25
 -11   2  21    0.24    0.23
 -11   2  22    0.12    0.24
 -10   2  13    8.83    0.29
 -10   2  14   25.06    0.35
 -10   2  22    1.08    0.25
 -10   2  23    2.56    0.26
 -10   2  24    1.59    0.24
  -9   2  12    0.00    0.24
  -9   2  13    0.21    0.24
  -9   2  23   -0.01    0.25
  -9   2  24   -0.01    0.26
  -8   2  12   15.99    0.33
  -8   2  24    2.95    0.28
  -8   2  25    1.27    0.27
  -7   2  12    0.43    0.24
  -7   2  24    0.26    0.25
  -7   2  25    0.65    0.26
  -6   2  12    9.05    0.29
  -6   2  24    3.31    0.27
  -6   2  25    6.00    0.28
  -5   2  12    0.12    0.24
  -5   2  24    0.24    0.25
  -5   2  25    0.37    0.25
  -4   2  12   29.21    0.38
  -4   2  13    2.19    0.18
  -4   2  23   20.13    0.32
  -4   2  24    5.90    0.27
  -4   2  25    0.71    0.25
  -3   2  13   -0.12    0.24
  -3   2  14   -0.01    0.17
  -3   2  22   -0.11    0.24
  -3   2  23    0.28    0.26
  -3   2  24    0.12    0.25
  -2   2  14    3.15    0.25
  -2   2  15   50.53    0.44
  -2   2  16   28.15    0.31
  -2   2  20   10.13    0.23
  -2   2  21   15.13    0.31
  -2   2  22   31.19    0.37
  -2   2  23   19.75    0.31
  -1   2  16   -0.15    0.23
  -1   2  17    0.19    0.25
  -1   2  18    0.36    0.23
  -1   2  19    0.24    0.25
  -1   2  20    0.46    0.25
  -1   2  21    0.24    0.23
 -18   1  14    0.15    0.29
 -18   1  15    0.09    0.26
 -18   1  16   -0.23    0.27
 -18   1  20   -0.01    0.29
 -18   1  21    0.17    0.31
 -18   1  22   -0.01    0.31
 -18   1  23   -0.20    0.36
 -17   1  11    2.75    0.30
 -17   1  25    0.70    0.34
 -16   1   9    0.32    0.27
  -6   1   3    0.06    0.27
  -3   1  32    4.58    0.31
  -2   1  32   -0.22    0.31
  -1   1  31    3.85    0.29
  -1   1  32    3.95    0.29
   0   1  31    0.56    0.29
   1   1  30    1.69    0.31
   2   1  29    0.29    0.28
   3   1   9   56.71    0.50
   3   1  27    0.75    0.27
   3   1  28    0.24    0.24
   4   1  25    0.15    0.25
   4   1  26    0.10    0.26
   5   1  13    5.67    0.27
   5   1  14   42.62    0.44
   5   1  22    3.56    0.27
   5   1  23   10.30    0.29
   5   1  24    3.88    0.29
 -22   0  15   -0.13    0.34
 -22   0  16    0.10    0.35
 -22   0  17    0.16    0.37
 -21   0  11    0.03    0.35
 -20   0   8    2.53    0.38
   5   0  32    0.28    0.31
   6   0  30    5.14    0.34
   6   0  31    0.39    0.33
   7   0  28   -0.01    0.26
   7   0  29    0.24    0.29
   8   0  10   49.53    0.53
   8   0  26    5.13    0.29
   8   0  27    5.92    0.33
   9   0  13    0.75    0.29
   9   0  14    0.43    0.23
   9   0  22    0.09    0.25
   9   0  23    0.11    0.26
 -24  -1  11    0.04    0.44
  -8  -1  -5    0.89    0.25
  -7  -1  -5   67.30    0.71
  -6  -1  -5    0.75    0.28
  -5  -1  -5   92.13    0.81
  10  -1   7    0.33    0.30
  10  -1  29    0.05    0.32
  11  -1  10   16.30    0.43
  11  -1  26    1.12    0.28
  12  -1  14    1.17    0.30
  12  -1  15    0.11    0.29
  12  -1  20    0.81    0.25
  12  -1  21   -0.08    0.26
  12  -1  22    0.22    0.32
 -19  -2  -2    0.13    0.38
 -18  -2  -3    7.49    0.42
 -11  -2  -7   -0.15    0.29
  -1  -2  -7    0.72    0.25
   3  -2  -5    0.60    0.26
  13  -2  27   -0.08    0.34
  14  -2  13   14.33    0.44
  14  -2  22    2.10    0.28
  14  -2  23    3.17    0.39
 -16  -3  -7    0.08    0.29
 -14  -3  -8    0.00    0.29
 -12  -3  -9    0.12    0.25
  -7  -3 -10    4.60    0.26
  -6  -3 -10    0.24    0.25
  -5  -3 -10   18.16    0.33
   2  -3  -8    0.72    0.24
   5  -3  -6  155.38    0.81
  10  -3  -1    0.38    0.26
  16  -3  15   -0.04    0.34
  16  -3  16    0.16    0.34
  16  -3  17   -0.04    0.32
  16  -3  18    0.11    0.34
  16  -3  19    0.10    0.34
  16  -3  20    0.01    0.35
  16  -3  21   -0.03    0.32
 -22  -4  -4    5.62    0.41
 -21  -4  -5   -0.03    0.35
 -20  -4  -6    0.44    0.35
 -16  -4  -9    3.17    0.27
 -14  -4 -10   19.31    0.35
 -11  -4 -11    0.19    0.23
  -1  -4 -11    0.36    0.24
   5  -4  -8    0.60    0.25
  13  -4   1    0.64    0.34
  17  -4  12    0.14    0.57
 -17  -5 -10    6.56    0.31
 -15  -5 -11    2.84    0.28
 -13  -5 -12    2.22    0.27
  -9  -5 -13   31.61    0.36
  -8  -5 -13    0.34    0.24
  -7  -5 -13    2.35    0.25
  -6  -5 -13    0.30    0.24
  -5  -5 -13   19.61    0.32
  -4  -5 -13    0.64    0.24
   0  -5 -12    1.55    0.24
   6  -5  -9    1.79    0.26
  11  -5  -4    2.28    0.32
  16  -5   5    0.15    0.39
 -21  -6  -8   -0.02    0.36
 -20  -6  -9    1.57    0.36
 -17  -6 -11    0.16    0.32
 -15  -6 -12    0.16    0.29
 -13  -6 -13   -0.15    0.27
  -9  -6 -14    0.27    0.24
  -8  -6 -14   23.06    0.35
  -7  -6 -14    0.14    0.25
  -6  -6 -14    3.38    0.26
  -5  -6 -14    0.63    0.24
  -4  -6 -14    4.45    0.26
  -3  -6 -14    0.40    0.23
   0  -6 -13    0.10    0.23
   1  -6 -13    0.58    0.19
   3  -6 -12    1.40    0.24
   5  -6 -11    0.20    0.23
   6  -6 -10    8.61    0.27
 -17  -7 -12    1.97    0.32
 -15  -7 -13    2.68    0.31
 -12  -7 -14    0.06    0.28
  -8  -7 -15    0.35    0.25
  -7  -7 -15    7.37    0.30
  -6  -7 -15   -0.07    0.26
  -5  -7 -15    3.75    0.27
  -4  -7 -15    0.13    0.19
   0  -7 -14    0.33    0.25
   6  -7 -11    0.71    0.25
  13  -7  -4    0.57    0.28
  15  -7  -1    2.75    0.32
  16  -7   1   -0.06    0.33
 -14  -8 -14    0.60    0.31
 -11  -8 -15    0.47    0.30
 -10  -8 -15    2.27    0.28
  -3  -8 -15   -0.16    0.24
  -2  -8 -15    0.13    0.25
  -1  -8 -15   -0.06    0.18
   1  -8 -14    0.38    0.24
   2  -8 -14    5.86    0.21
   4  -8 -13    5.56    0.28
   7  -8 -11    0.52    0.25
   8  -8 -10    1.30    0.24
  12  -8  -6    1.99    0.34
  13  -8  -5    0.42    0.29
  16  -8   0    1.02    0.35
  18  -8   5    0.66    0.44
 -11  -9 -15    3.32    0.30
  -1  -9 -15    0.05    0.28
   0  -9 -15    0.31    0.26
   2  -9 -14    0.47    0.28
   4  -9 -13    0.93    0.28
   6  -9 -12    0.00    0.28
  14  -9  -4   -0.09    0.31
  -1 -10 -15    0.16    0.30
   0 -10 -15   -0.09    0.27
   2 -10 -14    0.08    0.31
   4 -10 -13    1.35    0.27
   6 -10 -12    0.56    0.30
  10 -10  -9    5.19    0.31
 -13   2  17   -0.02    0.28
 -13   2  18    0.32    0.25
 -13   2  19   -0.04    0.26
 -13   2  20   -0.25    0.25
 -13   2  21    0.04    0.28
 -12   2  14    5.94    0.30
 -12   2  15    0.76    0.23
 -12   2  16    1.25    0.23
 -12   2  21    4.38    0.27
 -12   2  22    2.34    0.27
 -12   2  23    2.35    0.28
 -12   2  24    1.47    0.30
 -11   2  13    0.36    0.24
 -11   2  23    0.20    0.24
 -11   2  24    0.09    0.27
 -11   2  25    0.30    0.27
 -10   2  12    1.31    0.25
 -10   2  25    7.93    0.31
 -10   2  26    2.73    0.26
  -9   2  11    0.22    0.24
  -9   2  25    0.03    0.25
  -9   2  26    0.02    0.28
  -8   2  11    4.20    0.28
  -8   2  26    2.71    0.28
  -8   2  27    2.94    0.30
  -7   2  11    0.06    0.23
  -7   2  26   -0.23    0.24
  -7   2  27    0.06    0.27
  -6   2  11    6.12    0.27
  -6   2  26    1.12    0.24
  -6   2  27    0.48    0.26
  -5   2  11    0.13    0.24
  -5   2  26   -0.16    0.26
  -5   2  27   -0.20    0.27
  -4   2  11    5.53    0.28
  -4   2  26    2.41    0.27
  -4   2  27    2.22    0.26
  -3   2  12    0.51    0.24
  -3   2  25    0.27    0.25
  -3   2  26   -0.06    0.26
  -2   2  13   27.53    0.37
  -2   2  24    3.12    0.25
  -2   2  25   15.97    0.32
  -1   2  14    0.33    0.23
  -1   2  15    0.42    0.22
  -1   2  22    0.11    0.22
  -1   2  23   -0.06    0.24
  -1   2  24    0.01    0.24
   0   2  16    3.71    0.25
   0   2  17    4.91    0.25
   0   2  18   38.98    0.39
   0   2  19    1.45    0.25
   0   2  20   11.73    0.30
   0   2  21    8.79    0.29
   0   2  22    7.97    0.26
 -19   1  17    0.92    0.34
 -19   1  18    7.55    0.38
 -19   1  19    0.37    0.34
 -19   1  20    4.07    0.37
 -19   1  21    4.24    0.39
 -18   1  13    0.39    0.29
 -17   1  10    0.25    0.31
 -14   1   6    0.19    0.31
 -11   1   4   20.61    0.47
  -8   1   3    0.25    0.28
  -7   1   3   77.63    0.84
  -5   1   3   34.23    0.61
  -2   1   4    0.22    0.31
   0   1   5    0.28    0.31
   0   1  32   -0.61    0.32
   1   1   6   12.36    0.38
   1   1  31    3.40    0.32
   2   1   7    0.27    0.24
   2   1  30   -0.05    0.28
   3   1   8   93.70    0.68
   3   1  29    7.08    0.32
   4   1  10    0.20    0.24
   4   1  27    0.01    0.27
   4   1  28   -0.37    0.25
   5   1  12   14.92    0.33
   5   1  25    5.65    0.28
   5   1  26    3.86    0.31
   6   1  15    0.35    0.28
   6   1  16    0.28    0.25
   6   1  17    0.13    0.24
   6   1  18    0.33    0.24
   6   1  19    0.14    0.25
   6   1  20    0.11    0.23
   6   1  21    0.04    0.24
   6   1  22    0.29    0.25
 -22   0  13    7.95    0.46
 -22   0  14    2.27    0.39
 -21   0  10   -0.05    0.39
 -19   0   6    0.30    0.39
   4   0   3   82.14    1.17
   6   0  32    1.22    0.30
   7   0  30   -0.01    0.31
   8   0  28   -0.36    0.29
   9   0  12   -0.03    0.28
   9   0  24    0.13    0.26
   9   0  25    0.02    0.27
 -24  -1  10    0.13    0.48
 -15  -1  -2   18.15    0.62
  -1  -1  -4  106.31    0.91
  10  -1  30    0.06    0.32
  11  -1  27    0.32    0.31
  11  -1  28    0.29    0.37
  12  -1  13   -0.06    0.29
  12  -1  23   -0.36    0.27
  12  -1  24   -0.13    0.33
 -15  -2  -5    0.47    0.33
 -13  -2  -6    0.10    0.29
 -10  -2  -7    4.24    0.31
  -2  -2  -7   77.16    0.60
   1  -2  -6    0.04    0.24
   9  -2   1    0.39    0.35
  13  -2  28   -0.13    0.33
  14  -2  24    1.34    0.31
  14  -2  25    6.17    0.39
 -23  -3   0    0.24    0.47
 -17  -3  -6    5.33    0.34
 -11  -3  -9    1.90    0.24
  -1  -3  -9  109.10    0.63
   6  -3  -5    1.00    0.24
  16  -3  14    0.06    0.38
  16  -3  22   -0.01    0.33
  16  -3  23    0.41    0.36
 -24  -4  -1    0.05    0.47
 -17  -4  -8   -0.24    0.31
 -13  -4 -10    0.21    0.29
 -10  -4 -11   55.90    0.46
  -9  -4 -11    0.05    0.27
  -3  -4 -11    0.19    0.23
  -2  -4 -11    7.61    0.26
   1  -4 -10    0.43    0.24
   3  -4  -9    0.35    0.23
   6  -4  -7   12.48    0.32
 -18  -5  -9   -0.02    0.26
 -16  -5 -10    0.15    0.29
 -14  -5 -11    0.07    0.30
 -12  -5 -12    0.05    0.24
 -11  -5 -12    6.68    0.26
  -1  -5 -12   21.53    0.33
   2  -5 -11    0.30    0.24
   4  -5 -10    0.80    0.24
   7  -5  -8   10.46    0.31
   8  -5  -7    0.57    0.24
   9  -5  -6    8.02    0.29
  10  -5  -5    0.10    0.25
  13  -5  -1    4.09    0.32
 -18  -6 -10    2.80    0.35
 -12  -6 -13    3.06    0.27
 -11  -6 -13    0.20    0.27
  -1  -6 -13    0.35    0.25
   2  -6 -12   15.72    0.32
   4  -6 -11   30.07    0.37
   7  -6  -9    1.31    0.24
  12  -6  -4    5.25    0.28
  14  -6  -1    8.94    0.37
  16  -6   3    3.79    0.37
  18  -6   9    0.03    0.55
 -18  -7 -11    0.01    0.32
 -16  -7 -12   -0.05    0.32
 -14  -7 -13   -0.20    0.28
 -11  -7 -14    0.08    0.26
 -10  -7 -14    0.20    0.24
  -2  -7 -14    0.36    0.25
  -1  -7 -14    4.60    0.25
   2  -7 -13    0.59    0.23
   4  -7 -12    0.80    0.24
   7  -7 -10    0.01    0.25
   8  -7  -9    0.70    0.23
  12  -7  -5    0.26    0.29
 -15  -8 -13    0.04    0.31
 -13  -8 -14    0.13    0.31
 -12  -8 -14    2.09    0.32
  -9  -8 -15    0.18    0.25
  -8  -8 -15    6.57    0.30
  -7  -8 -15    0.68    0.26
  -6  -8 -15    4.10    0.29
  -5  -8 -15    1.13    0.27
  -4  -8 -15    0.30    0.27
   0  -8 -14   -0.04    0.26
   3  -8 -13    0.07    0.27
   5  -8 -12    0.53    0.24
   6  -8 -11    2.31    0.25
   9  -8  -9    0.34    0.27
  10  -8  -8   10.86    0.34
  11  -8  -7    0.68    0.28
  14  -8  -3    2.75    0.34
 -10  -9 -15    0.22    0.30
  -9  -9 -15    0.89    0.29
  -8  -9 -15    0.30    0.27
  -7  -9 -15    4.08    0.28
  -5  -9 -15    1.14    0.27
  -4  -9 -15    0.31    0.27
  -3  -9 -15    0.82    0.29
  -2  -9 -15    0.03    0.25
   1  -9 -14    1.19    0.30
   3  -9 -13    1.05    0.28
   5  -9 -12    9.66    0.31
   7  -9 -11    0.75    0.25
   8  -9 -10    0.12    0.29
   9  -9  -9    0.42    0.31
  11  -9  -7    0.25    0.31
  12  -9  -6    0.26    0.32
  13  -9  -5    0.28    0.30
  15  -9  -2    0.22    0.33
  -5 -10 -15    0.00    0.29
  -4 -10 -15    2.00    0.31
  -3 -10 -15   -0.04    0.31
  -2 -10 -15    0.25    0.29
   1 -10 -14    0.11    0.31
   3 -10 -13    0.25    0.31
   5 -10 -12    0.02    0.30
   7 -10 -11    0.00    0.28
   8 -10 -10    1.89    0.33
   9 -10  -9    0.32    0.33
  10 -10  -8    0.92    0.33
  11 -10  -7    0.36    0.34
  12 -10  -6    0.25    0.33
 -14   2  17    1.90    0.30
 -14   2  18    0.27    0.30
 -14   2  19    3.93    0.30
 -14   2  20    3.51    0.30
 -14   2  21    2.12    0.33
 -14   2  22    2.20    0.31
 -13   2  14   -0.08    0.29
 -13   2  15    0.38    0.25
 -13   2  16    0.41    0.24
 -13   2  22   -0.01    0.27
 -13   2  23   -0.10    0.29
 -13   2  24   -0.03    0.29
 -12   2  13   11.08    0.31
 -12   2  25    1.21    0.30
 -12   2  26    0.02    0.29
 -11   2  12    0.30    0.24
 -11   2  26    0.11    0.28
 -11   2  27   -0.12    0.28
 -10   2  11    7.53    0.29
 -10   2  27    0.40    0.28
 -10   2  28    0.16    0.27
  -9   2  10    0.54    0.28
  -9   2  27    0.18    0.26
  -9   2  28    0.44    0.29
  -8   2  10    5.36    0.28
  -8   2  28    1.77    0.29
  -8   2  29   -0.32    0.27
  -7   2  10    0.34    0.24
  -7   2  28    0.05    0.28
  -7   2  29    0.24    0.27
  -6   2  10    0.70    0.25
  -6   2  28    0.27    0.28
  -6   2  29    0.03    0.28
  -5   2  10    0.74    0.24
  -5   2  28   -0.05    0.27
  -5   2  29   -0.10    0.25
  -4   2  10   14.09    0.32
  -4   2  28    4.80    0.30
  -3   2  11    0.48    0.24
  -3   2  27    0.35    0.27
  -3   2  28   -0.05    0.26
  -2   2  12    3.63    0.19
  -2   2  26    9.86    0.28
  -2   2  27    0.58    0.26
  -1   2  13    0.03    0.23
  -1   2  25    0.28    0.25
  -1   2  26    0.38    0.26
   0   2  14    1.26    0.24
   0   2  15   20.13    0.32
   0   2  23    3.44    0.27
   0   2  24    2.33    0.25
   0   2  25    5.36    0.27
   1   2  16   -0.23    0.23
   1   2  17    0.20    0.23
   1   2  18   -0.11    0.24
   1   2  19   -0.46    0.25
   1   2  20    0.33    0.24
   1   2  21    0.43    0.25
   1   2  22    0.36    0.25
 -19   1  15    6.03    0.36
 -19   1  16    6.95    0.31
 -19   1  22    0.57    0.34
 -18   1  12    0.13    0.30
 -16   1   8    0.14    0.32
 -15   1   7   27.25    0.49
 -13   1   5    7.51    0.39
  -9   1   3   31.68    0.61
  -4   1   3    0.26    0.35
   1   1  32    2.39    0.29
   2   1  31    0.15    0.27
   2   1  32    0.33    0.28
   3   1  30    0.63    0.29
   3   1  31    0.09    0.27
   4   1   9    0.15    0.23
   4   1  29   -0.06    0.29
   5   1  11   41.49    0.46
   5   1  27    1.23    0.27
   6   1  14    0.81    0.25
   6   1  23    0.02    0.23
   6   1  24    0.07    0.24
   6   1  25    0.06    0.23
 -22   0  12    1.04    0.42
   3   0   2    0.15    0.39
   5   0   4    0.07    0.30
   7   0   7    0.64    0.25
   7   0  31   -0.37    0.33
   8   0   9   47.65    0.55
   8   0  29    0.15    0.30
   9   0  26    0.02    0.27
   9   0  27   -0.06    0.28
  10   0  16   33.62    0.46
  10   0  17    1.27    0.27
  10   0  18   20.62    0.36
  10   0  19   42.49    0.44
  10   0  20   16.75    0.34
  10   0  21    0.03    0.26
  10   0  22    1.94    0.27
  10   0  23    3.38    0.30
 -11  -1  -4   20.69    0.48
   1  -1  -3   75.40    0.84
  11  -1   9   26.55    0.54
  11  -1  29    0.22    0.33
  12  -1  25    0.17    0.30
  12  -1  26   -0.10    0.31
  -9  -2  -7    1.11    0.29
  -3  -2  -7    0.88    0.25
   4  -2  -4   11.62    0.34
  14  -2  12   19.76    0.49
  14  -2  26    0.30    0.36
 -15  -3  -7   21.01    0.42
 -13  -3  -8   33.87    0.49
 -10  -3  -9    0.05    0.23
  -2  -3  -9    0.54    0.24
   1  -3  -8    9.23    0.30
   3  -3  -7   27.06    0.39
   7  -3  -4  124.04    0.79
  15  -3   9    6.63    0.79
  16  -3  24    0.21    0.38
 -18  -4  -7    6.79    0.35
 -15  -4  -9    0.00    0.23
 -12  -4 -10    0.25    0.28
  -8  -4 -11    7.50    0.28
  -7  -4 -11    0.11    0.24
  -6  -4 -11    0.92    0.24
  -5  -4 -11    0.09    0.24
  -4  -4 -11   23.66    0.34
   0  -4 -10    1.73    0.25
   7  -4  -6    0.24    0.25
   8  -4  -5    8.85    0.33
   9  -4  -4    0.53    0.28
 -23  -5  -4    0.27    0.41
 -20  -5  -7    0.19    0.35
 -19  -5  -8    1.19    0.29
 -13  -5 -11    0.69    0.29
 -10  -5 -12    0.07    0.24
  -9  -5 -12   13.83    0.32
  -3  -5 -12   28.88    0.36
  -2  -5 -12    0.34    0.25
   1  -5 -11    2.79    0.25
   3  -5 -10   28.55    0.36
   5  -5  -9    6.46    0.27
  14  -5   1    3.02    0.34
  15  -5   3    8.76    0.42
 -19  -6  -9   -0.15    0.35
 -16  -6 -11    0.52    0.28
 -14  -6 -12    0.89    0.28
 -10  -6 -13    1.44    0.25
  -9  -6 -13    0.25    0.22
  -3  -6 -13    0.61    0.27
  -2  -6 -13    8.20    0.29
   1  -6 -12    1.27    0.25
   5  -6 -10    0.04    0.25
   8  -6  -8   20.83    0.33
   9  -6  -7    0.51    0.23
  10  -6  -6    5.39    0.28
  11  -6  -5    0.20    0.25
  15  -6   1    0.13    0.31
 -19  -7 -10   -0.17    0.34
 -17  -7 -11   -0.69    0.37
 -15  -7 -12    0.07    0.31
 -13  -7 -13    6.41    0.32
  -9  -7 -14    1.17    0.26
  -8  -7 -14    0.16    0.27
  -7  -7 -14    2.60    0.27
  -6  -7 -14   -0.03    0.25
  -5  -7 -14    4.13    0.28
  -4  -7 -14    1.03    0.26
  -3  -7 -14    9.52    0.27
   0  -7 -13    0.79    0.24
   1  -7 -13    9.00    0.22
   3  -7 -12    0.28    0.26
   5  -7 -11    0.27    0.25
   9  -7  -8   20.49    0.36
  10  -7  -7    0.29    0.26
  11  -7  -6    0.97    0.26
  17  -7   4    0.32    0.38
  18  -7   7    0.14    0.43
 -16  -8 -12   -0.52    0.35
 -14  -8 -13    0.28    0.31
 -11  -8 -14    0.06    0.29
 -10  -8 -14    6.52    0.31
  -2  -8 -14    6.55    0.28
  -1  -8 -14   -0.03    0.26
   2  -8 -13    8.81    0.30
   4  -8 -12    0.88    0.27
   7  -8 -10    0.15    0.25
  13  -8  -4    0.24    0.34
  16  -8   1    0.77    0.34
  17  -8   3    0.01    0.39
 -12  -9 -14    0.15    0.33
  -6  -9 -15    0.42    0.27
  -1  -9 -14    2.53    0.29
   0  -9 -14    0.12    0.26
   2  -9 -13    0.04    0.27
   4  -9 -12    1.06    0.26
   6  -9 -11    0.18    0.28
  10  -9  -8    0.30    0.28
  14  -9  -3   -0.06    0.31
  -1 -10 -14    0.01    0.31
   0 -10 -14    0.56    0.28
   2 -10 -13    1.61    0.31
   4 -10 -12    0.69    0.28
   6 -10 -11    0.82    0.30
 -15   2  18   -0.04    0.31
 -15   2  19    0.06    0.30
 -15   2  20    0.00    0.28
 -15   2  21    0.19    0.29
 -14   2  15   23.59    0.37
 -14   2  16   11.07    0.31
 -14   2  23    3.55    0.30
 -14   2  24    0.56    0.30
 -14   2  25    6.28    0.30
 -13   2  13    0.41    0.25
 -13   2  25   -0.06    0.30
 -13   2  26    0.20    0.31
 -13   2  27    0.68    0.33
 -12   2  12   59.00    0.52
 -12   2  27    0.01    0.40
 -12   2  28    1.18    0.28
 -11   2  11    0.12    0.23
 -11   2  28   -0.07    0.30
 -11   2  29    0.01    0.28
 -10   2  10    0.43    0.23
 -10   2  29    0.00    0.30
  -9   2  29   -0.04    0.27
  -9   2  30    0.18    0.31
  -8   2   9    9.03    0.33
  -8   2  30    0.09    0.31
  -7   2   9    0.31    0.24
  -7   2  30   -0.41    0.32
  -6   2   9   45.63    0.47
  -6   2  30    0.02    0.31
  -5   2   9    0.58    0.25
  -5   2  30    0.06    0.30
  -4   2  29    0.11    0.26
  -4   2  30    2.31    0.29
  -3   2  10    0.14    0.24
  -3   2  29    0.04    0.28
  -2   2  11   83.22    0.53
  -2   2  28    0.28    0.28
  -2   2  29    0.30    0.27
  -1   2  12    0.11    0.16
  -1   2  27   -0.14    0.25
  -1   2  28   -0.05    0.27
   0   2  13   -0.04    0.23
   0   2  26   -0.05    0.26
   0   2  27    2.22    0.28
   1   2  14    0.60    0.23
   1   2  15    0.65    0.24
   1   2  23   -0.01    0.17
   1   2  24    0.28    0.25
   1   2  25    0.27    0.26
   2   2  17    4.63    0.25
   2   2  18   15.54    0.31
   2   2  19   14.23    0.31
   2   2  20   10.78    0.30
   2   2  21   15.83    0.32
   2   2  22   31.01    0.37
   2   2  23   18.86    0.31
 -20   1  18    0.14    0.35
 -20   1  19   -0.19    0.36
 -20   1  20    0.26    0.34
 -20   1  21   -0.20    0.38
 -19   1  13    1.06    0.31
 -19   1  14    2.03    0.34
 -18   1  11    0.01    0.32
 -17   1   9   16.36    0.40
  -1   1   4  104.73    0.90
   3   1  32    2.99    0.34
   4   1  30   -0.01    0.30
   4   1  31    0.39    0.26
   5   1  28    5.28    0.26
   5   1  29    1.92    0.28
   6   1  13    0.29    0.24
   6   1  26    0.14    0.26
   6   1  27   -0.12    0.25
   7   1  16    0.08    0.27
   7   1  17   11.89    0.30
   7   1  18   38.87    0.40
   7   1  19    8.02    0.27
   7   1  20   10.13    0.28
   7   1  21    7.46    0.27
   7   1  22   21.26    0.34
   7   1  23    1.53    0.25
 -21   0   9   -0.04    0.35
 -20   0   7    2.89    0.43
   8   0  30    3.05    0.33
   8   0  31    0.16    0.29
   9   0  11   -0.22    0.23
   9   0  28    0.15    0.29
  10   0  14    0.11    0.27
  10   0  15    6.01    0.29
  10   0  24    9.47    0.32
  10   0  25   11.74    0.33
 -23  -1   7    0.22    0.57
 -13  -1  -3   19.87    0.56
   5  -1   0  110.56    1.55
   6  -1   1    1.94    0.57
  12  -1  12    0.15    0.30
  12  -1  27    0.17    0.31
  13  -1  17   10.26    0.35
  13  -1  18    4.90    0.33
  13  -1  19    8.57    0.34
  13  -1  20    7.13    0.32
  13  -1  21   -0.28    0.31
  13  -1  22   11.33    0.37
 -22  -2   2    5.03    0.70
 -16  -2  -4   19.84    0.47
 -12  -2  -6    5.85    0.32
  -8  -2  -7  154.54    0.88
  -4  -2  -7   66.00    0.57
   0  -2  -6   62.32    0.58
   2  -2  -5    8.51    0.32
  14  -2  27    2.23    0.35
  15  -2  18    0.11    0.29
  15  -2  19    0.04    0.31
  15  -2  20    0.10    0.31
  15  -2  21   -0.06    0.31
  15  -2  22    0.00    0.32
 -22  -3  -1    0.19    0.39
 -19  -3  -4    0.87    0.34
 -18  -3  -5    0.05    0.30
  -9  -3  -9    3.16    0.26
  -8  -3  -9    0.17    0.24
  -5  -3  -9    3.44    0.25
  -4  -3  -9    0.50    0.25
  -3  -3  -9   10.23    0.25
   0  -3  -8   -0.01    0.24
   4  -3  -6    1.14    0.26
  11  -3   1   34.01    0.63
  16  -3  13    0.11    0.38
 -23  -4  -2    0.20    0.41
 -19  -4  -6    0.00    0.32
 -16  -4  -8    7.40    0.34
 -14  -4  -9    2.74    0.33
 -11  -4 -10    0.45    0.27
  -1  -4 -10    0.37    0.23
   2  -4  -9   14.39    0.31
   4  -4  -8   19.36    0.30
  12  -4   0   14.92    0.42
 -22  -5  -5    0.17    0.35
 -21  -5  -6    0.26    0.33
 -17  -5  -9    1.90    0.29
 -15  -5 -10    9.16    0.32
 -12  -5 -11    0.59    0.26
  -8  -5 -12    0.79    0.24
  -7  -5 -12    4.95    0.26
  -6  -5 -12    0.27    0.23
  -5  -5 -12    1.56    0.24
  -4  -5 -12    0.61    0.25
   0  -5 -11    0.74    0.24
   6  -5  -8    0.64    0.25
 -21  -6  -7    0.22    0.37
 -20  -6  -8    1.53    0.33
 -17  -6 -10    0.13    0.29
 -15  -6 -11    0.08    0.28
 -13  -6 -12    0.15    0.26
 -12  -6 -12    2.08    0.28
  -8  -6 -13    5.61    0.27
  -7  -6 -13    0.57    0.25
  -6  -6 -13    4.15    0.26
  -5  -6 -13    0.46    0.25
  -4  -6 -13    1.16    0.24
   0  -6 -12    3.73    0.27
   3  -6 -11    0.73    0.18
   6  -6  -9    5.93    0.28
  17  -6   6    0.34    0.40
 -18  -7 -10   -0.04    0.34
 -14  -7 -12    0.17    0.30
 -12  -7 -13    0.36    0.27
 -11  -7 -13    1.26    0.26
  -1  -7 -13    8.73    0.27
   2  -7 -12   -0.52    0.24
   4  -7 -11    0.32    0.25
   6  -7 -10    0.00    0.24
   7  -7  -9    8.83    0.28
  13  -7  -3    0.95    0.25
  15  -7   0    0.68    0.27
  16  -7   2    0.04    0.33
 -13  -8 -13    0.17    0.31
  -9  -8 -14    0.28    0.28
  -8  -8 -14    4.45    0.30
  -7  -8 -14   -0.10    0.27
  -6  -8 -14    1.24    0.27
  -5  -8 -14   -0.11    0.27
  -4  -8 -14    1.74    0.27
  -3  -8 -14    0.10    0.26
   0  -8 -13    3.97    0.26
   1  -8 -13    0.37    0.23
   3  -8 -12   -0.57    0.27
   5  -8 -11    0.19    0.25
   8  -8  -9    0.82    0.25
   9  -8  -8    0.47    0.27
  10  -8  -7    9.50    0.33
  11  -8  -6    0.29    0.28
  12  -8  -5    1.71    0.28
  14  -8  -2    3.88    0.33
  18  -8   6    0.70    0.44
 -11  -9 -14    0.53    0.30
 -10  -9 -14   -0.50    0.30
  -9  -9 -14    0.55    0.30
  -4  -9 -14    0.16    0.25
  -3  -9 -14    0.11    0.27
  -2  -9 -14   -0.01    0.27
   1  -9 -13    0.28    0.27
   3  -9 -12    0.07    0.24
   5  -9 -11    0.49    0.28
   7  -9 -10    0.82    0.28
   8  -9  -9   -0.06    0.29
   9  -9  -8   -0.26    0.30
  12  -9  -5   -0.02    0.31
  13  -9  -4    0.95    0.31
  15  -9  -1    2.06    0.33
  -7 -10 -14    0.25    0.33
  -5 -10 -14    0.76    0.28
  -4 -10 -14    2.36    0.32
  -3 -10 -14   -0.13    0.30
  -2 -10 -14    0.02    0.28
   1 -10 -13   -0.18    0.31
   3 -10 -12    0.15    0.30
   5 -10 -11   -0.11    0.29
   7 -10 -10    0.04    0.28
   8 -10  -9    0.57    0.32
   9 -10  -8    0.20    0.27
  10 -10  -7    0.60    0.34
  11 -10  -6    0.08    0.33
  12 -10  -5    0.17    0.32
 -15   2  16    0.01    0.27
 -15   2  17    0.05    0.27
 -15   2  22    0.07    0.27
 -15   2  23    0.18    0.29
 -15   2  24   -0.15    0.29
 -15   2  25    0.20    0.27
 -14   2  13   14.14    0.37
 -14   2  14    3.27    0.26
 -14   2  26    0.24    0.32
 -14   2  27    2.67    0.33
 -13   2  12    0.40    0.26
 -13   2  28   -0.35    0.34
 -12   2  11   12.63    0.33
 -11   2  10    0.09    0.23
 -10   2  30    1.14    0.28
  -9   2   9    0.06    0.23
  -7   2  31   -0.03    0.28
  -6   2  31    3.73    0.30
  -5   2  31    0.07    0.27
  -4   2   9   77.95    0.58
  -4   2  31    0.39    0.31
  -3   2  30   -0.07    0.21
  -3   2  31   -0.30    0.29
  -2   2  10   11.23    0.31
  -2   2  30    0.99    0.30
  -2   2  31    0.11    0.27
  -1   2  11    0.66    0.17
  -1   2  29    0.06    0.28
  -1   2  30    0.24    0.25
   0   2  12   11.93    0.30
   0   2  28    3.52    0.28
   0   2  29    0.40    0.25
   1   2  13    0.04    0.23
   1   2  26    0.46    0.24
   1   2  27    0.13    0.26
   2   2  15   53.88    0.45
   2   2  16   27.87    0.35
   2   2  24    2.88    0.27
   2   2  25   16.81    0.33
   2   2  26   10.14    0.28
   3   2  18    0.53    0.23
   3   2  19    0.00    0.24
   3   2  20    0.00    0.23
   3   2  21   -0.27    0.25
   3   2  22    0.50    0.22
 -20   1  16    0.48    0.35
 -20   1  17    0.13    0.29
 -18   1  10    0.22    0.32
 -12   1   4    0.31    0.27
 -10   1   3    1.01    0.31
  -3   1   3   88.89    0.91
   2   1   6    0.19    0.28
   3   1   7   37.35    0.48
   4   1  32    0.34    0.30
   5   1  10    7.54    0.29
   5   1  30    3.78    0.31
   6   1  12    0.09    0.24
   6   1  28   -0.03    0.27
   6   1  29   -0.29    0.30
   7   1  15   11.49    0.31
   7   1  24    0.60    0.24
   7   1  25    1.04    0.26
   7   1  26    2.97    0.25
 -23   0  14    0.02    0.41
 -23   0  15   -0.07    0.37
 -22   0  11    0.29    0.36
 -17   0   3    0.12    0.56
   6   0   5   26.23    0.56
   8   0   8    3.88    0.30
   9   0  29    0.01    0.29
   9   0  30   -0.01    0.31
  10   0  13    5.49    0.32
  10   0  26    0.10    0.28
  10   0  27    9.12    0.34
 -24  -1   9    0.24    0.53
 -10  -1  -4    0.99    0.28
  -2  -1  -4    0.11    0.31
  12  -1  11    0.18    0.32
  12  -1  28    0.14    0.31
  12  -1  29    0.08    0.37
  13  -1  16    5.03    0.32
  13  -1  23    1.54    0.31
  13  -1  24    6.47    0.37
  13  -1  25    0.90    0.34
 -14  -2  -5    0.92    0.30
  -7  -2  -7    0.67    0.24
  -6  -2  -7  115.34    0.72
  -5  -2  -7    0.45    0.23
   8  -2   0  202.91    1.48
  13  -2   8   -0.01    0.41
  14  -2  11   20.04    0.53
  15  -2  16    0.17    0.33
  15  -2  17    0.06    0.30
  15  -2  23    0.03    0.33
  15  -2  24   -0.11    0.37
 -24  -3   2   -0.02    0.54
 -21  -3  -2    1.64    0.38
 -20  -3  -3    0.41    0.34
 -16  -3  -6    0.03    0.27
 -12  -3  -8    0.09    0.24
  -7  -3  -9   31.15    0.40
  -6  -3  -9    0.22    0.24
   2  -3  -7    1.25    0.25
 -22  -4  -3    1.12    0.39
 -21  -4  -4    0.56    0.35
 -20  -4  -5    0.17    0.34
 -10  -4 -10   24.19    0.36
  -2  -4 -10    0.48    0.23
   1  -4  -9    0.50    0.24
   5  -4  -7    0.18    0.25
  15  -4   6    0.01    0.48
  18  -4  18    2.28    0.44
  18  -4  19    7.15    0.49
  18  -4  20    0.22    0.43
  18  -4  21    1.06    0.45
 -18  -5  -8    0.00    0.27
 -16  -5  -9    0.16    0.29
 -14  -5 -10   -0.05    0.29
 -11  -5 -11    5.09    0.26
  -1  -5 -11    3.05    0.25
   2  -5 -10    0.92    0.24
   4  -5  -9    0.72    0.24
   7  -5  -7   25.15    0.37
   8  -5  -6    1.02    0.24
   9  -5  -5   31.97    0.43
  10  -5  -4    0.23    0.29
 -18  -6  -9    0.06    0.29
 -16  -6 -10    0.65    0.32
 -14  -6 -11    3.20    0.28
 -11  -6 -12    0.30    0.25
  -2  -6 -12   15.69    0.30
  -1  -6 -12    1.11    0.26
   2  -6 -11    3.50    0.26
   4  -6 -10   14.83    0.30
   7  -6  -8    1.39    0.24
   8  -6  -7    5.43    0.30
  12  -6  -3    6.09    0.32
  14  -6   0    0.80    0.31
 -19  -7  -9    4.38    0.40
 -16  -7 -11    0.17    0.30
 -13  -7 -12    0.50    0.30
 -10  -7 -13    0.06    0.25
  -9  -7 -13    1.42    0.26
  -8  -7 -13   -0.07    0.24
  -4  -7 -13    0.49    0.24
  -3  -7 -13    2.74    0.25
  -2  -7 -13    0.74    0.22
   1  -7 -12    2.26    0.25
   3  -7 -11   17.36    0.31
   5  -7 -10    5.97    0.27
   8  -7  -8    0.55    0.25
   9  -7  -7    7.70    0.29
  10  -7  -6    0.06    0.28
  11  -7  -5    0.17    0.29
  12  -7  -4    0.44    0.24
 -15  -8 -12    0.23    0.29
 -14  -8 -12    1.00    0.31
 -12  -8 -13    3.80    0.30
 -11  -8 -13    0.37    0.27
  -1  -8 -13    0.47    0.26
   2  -8 -12    1.32    0.27
   4  -8 -11    6.27    0.29
   6  -8 -10    1.29    0.26
   7  -8  -9    0.27    0.26
  13  -8  -3    0.27    0.33
  17  -8   4    0.22    0.43
 -12  -9 -13    0.03    0.32
  -8  -9 -14    0.19    0.26
  -7  -9 -14    1.14    0.28
  -6  -9 -14    0.07    0.27
  -5  -9 -14    3.67    0.28
  -1  -9 -13    0.70    0.26
   0  -9 -13   -0.13    0.27
   2  -9 -12   -0.13    0.24
   6  -9 -10    0.57    0.27
  10  -9  -7   -0.05    0.29
  11  -9  -6    3.72    0.31
  14  -9  -2   -0.12    0.35
  -6 -10 -14    2.33    0.31
  -1 -10 -13   -0.08    0.29
   0 -10 -13    4.30    0.29
   2 -10 -12    4.93    0.32
   4 -10 -11   -0.14    0.26
   6 -10 -10    2.52    0.31
 -16   2  16    2.35    0.30
 -16   2  17    1.91    0.27
 -16   2  18    2.44    0.29
 -16   2  19    1.04    0.28
 -16   2  20    0.55    0.28
 -16   2  21    1.04    0.29
 -16   2  22    0.55    0.30
 -16   2  23   -0.11    0.32
 -16   2  24    0.09    0.32
 -16   2  25    1.40    0.30
 -15   2  14   -0.10    0.28
 -15   2  15    0.53    0.26
 -15   2  26   -0.23    0.32
 -14   2  12   18.74    0.40
 -13   2  11    0.34    0.31
 -12   2  10   10.54    0.35
 -10   2   9   10.85    0.31
  -8   2   8    3.16    0.30
  -7   2   8    0.36    0.23
  -6   2   8   32.42    0.42
  -5   2   8    0.38    0.25
  -4   2  32    0.27    0.28
  -3   2   9    0.54    0.17
  -3   2  32   -0.11    0.32
  -2   2  32    1.75    0.33
  -1   2  10    0.23    0.24
  -1   2  31    0.08    0.29
   0   2  11    0.02    0.23
   0   2  30    0.58    0.29
   1   2  12    0.23    0.23
   1   2  28    0.26    0.20
   1   2  29   -0.09    0.28
   2   2  14    3.12    0.25
   2   2  27    0.55    0.26
   2   2  28    2.77    0.29
   3   2  16    0.30    0.24
   3   2  17    0.62    0.23
   3   2  23    0.47    0.24
   3   2  24    0.57    0.25
   3   2  25   -0.05    0.25
   3   2  26    0.17    0.24
 -21   1  19    2.49    0.38
 -20   1  14    0.13    0.31
 -20   1  15    0.23    0.29
 -19   1  12    1.28    0.30
 -17   1   8    3.97    0.34
 -16   1   7    0.27    0.30
 -15   1   6    1.97    0.33
 -14   1   5    0.09    0.31
   1   1   5   23.48    0.43
   4   1   8    0.46    0.23
   5   1  31    4.69    0.30
   5   1  32    0.12    0.31
   6   1  11   -0.09    0.24
   6   1  30    0.04    0.30
   7   1  14   69.68    0.54
   7   1  27    6.35    0.30
   7   1  28    6.84    0.29
   8   1  17    1.33    0.28
   8   1  18    0.54    0.23
   8   1  19    0.32    0.23
   8   1  20    0.15    0.22
   8   1  21    0.24    0.24
   8   1  22    0.03    0.25
   8   1  23    0.61    0.24
   8   1  24    0.21    0.27
 -23   0  13    0.18    0.42
 -18   0   4   -0.02    0.47
   9   0  10    0.22    0.24
  10   0  28    2.06    0.30
  10   0  29    4.26    0.34
  11   0  17   -0.06    0.30
  11   0  18   -0.09    0.25
  11   0  19    0.25    0.24
  11   0  20    0.16    0.25
  11   0  21    0.12    0.25
  11   0  22   -0.16    0.26
  11   0  23   -0.27    0.27
  11   0  24    0.38    0.28
 -16  -1  -1    0.15    0.43
  13  -1  15    3.08    0.30
  13  -1  26    4.79    0.33
  13  -1  27    0.02    0.35
 -17  -2  -3    0.61    0.33
 -11  -2  -6   -0.05    0.28
  -1  -2  -6    0.26    0.24
  15  -2  15    0.47    0.34
  15  -2  25    0.21    0.32
  15  -2  26    0.14    0.37
 -14  -3  -7    0.69    0.25
 -11  -3  -8    3.05    0.25
  -1  -3  -8    9.60    0.24
   5  -3  -5   25.38    0.38
  17  -3  21    3.55    0.42
 -17  -4  -7    0.04    0.25
 -15  -4  -8   -0.23    0.28
 -13  -4  -9    0.23    0.25
  -9  -4 -10    0.50    0.25
  -8  -4 -10   18.29    0.34
  -5  -4 -10    0.59    0.23
  -4  -4 -10    2.80    0.25
  -3  -4 -10    0.22    0.22
   3  -4  -8    0.69    0.17
   6  -4  -6   26.17    0.38
  11  -4  -1    1.15    0.29
  13  -4   2    0.06    0.33
  18  -4  17    0.99    0.48
 -20  -5  -6    0.09    0.33
 -19  -5  -7    2.20    0.29
 -13  -5 -10    1.50    0.30
 -10  -5 -11    0.15    0.22
  -9  -5 -11   15.66    0.33
  -3  -5 -11   32.26    0.37
  -2  -5 -11    0.94    0.25
   1  -5 -10    5.91    0.27
   3  -5  -9   10.15    0.28
   5  -5  -8   11.20    0.30
  13  -5   0   18.59    0.43
  16  -5   6    0.09    0.43
 -19  -6  -8    0.22    0.30
 -13  -6 -11    0.13    0.26
 -10  -6 -12    1.71    0.25
  -9  -6 -12   -0.43    0.25
  -8  -6 -12    8.33    0.27
  -4  -6 -12    4.36    0.26
  -3  -6 -12    1.47    0.26
   1  -6 -11    0.55    0.24
   3  -6 -10    1.41    0.24
   5  -6  -9    0.09    0.24
   9  -6  -6    0.86    0.24
  10  -6  -5    2.03    0.25
  11  -6  -4    0.98    0.27
  15  -6   2    0.66    0.34
  16  -6   4    3.33    0.37
 -17  -7 -10    1.99    0.32
 -15  -7 -11   -0.28    0.29
 -12  -7 -12    0.04    0.27
  -7  -7 -13    1.62    0.24
  -6  -7 -13    0.86    0.25
  -5  -7 -13   11.41    0.28
   0  -7 -12   -0.03    0.25
   6  -7  -9    0.31    0.25
  15  -7   1    2.80    0.34
  16  -7   3    0.40    0.37
  17  -7   5    0.17    0.40
  18  -7   8    0.19    0.47
 -16  -8 -11    4.21    0.35
 -13  -8 -12    0.23    0.27
 -10  -8 -13    3.60    0.29
  -9  -8 -13    0.28    0.28
  -8  -8 -13    6.22    0.27
  -5  -8 -13    0.57    0.24
  -4  -8 -13    5.88    0.28
  -3  -8 -13    0.35    0.27
  -2  -8 -13    9.69    0.28
   1  -8 -12    0.20    0.26
   3  -8 -11    0.30    0.25
   5  -8 -10   -0.45    0.25
   8  -8  -8    1.15    0.25
   9  -8  -7    0.91    0.29
  10  -8  -6    1.78    0.32
  11  -8  -5   -0.25    0.32
  12  -8  -4    1.64    0.31
  16  -8   2    1.14    0.35
  18  -8   7    0.12    0.47
 -11  -9 -13    0.98    0.31
 -10  -9 -13    0.25    0.29
  -9  -9 -13    1.25    0.28
  -3  -9 -13    1.56    0.28
  -2  -9 -13    0.30    0.26
   1  -9 -12    7.66    0.31
   4  -9 -11    0.53    0.25
   5  -9 -10   12.23    0.34
   7  -9  -9    1.13    0.27
   8  -9  -8    0.48    0.29
  12  -9  -4   -0.10    0.33
  13  -9  -3    3.83    0.32
  15  -9   0    0.96    0.36
  -8 -10 -13   -0.12    0.29
  -5 -10 -13    0.26    0.27
  -4 -10 -13    1.91    0.31
  -3 -10 -13    0.12    0.30
  -2 -10 -13    1.46    0.28
   1 -10 -12    0.38    0.29
   3 -10 -11   -0.01    0.27
   5 -10 -10    0.31    0.28
   7 -10  -9    0.36    0.27
   8 -10  -8    0.38    0.30
   9 -10  -7    0.40    0.31
  10 -10  -6    3.77    0.38
  11 -10  -5    0.28    0.33
  12 -10  -4    0.33    0.36
  13 -10  -3    0.21    0.32
  -8   3  20    0.21    0.23
  -8   3  21    0.25    0.23
  -8   3  22    0.73    0.23
  -7   3  19    7.38    0.26
  -7   3  20    5.68    0.27
  -7   3  21    3.27    0.26
  -7   3  22    9.50    0.28
  -7   3  23    0.34    0.25
  -6   3  19    0.43    0.23
  -6   3  20    0.00    0.24
  -6   3  21    0.25    0.26
  -6   3  22   -0.01    0.25
  -6   3  23    0.26    0.23
  -5   3  20    9.51    0.27
  -5   3  21   18.04    0.33
  -5   3  22    0.25    0.23
  -5   3  23    2.62    0.24
 -17   2  18   -0.20    0.32
 -17   2  19    0.13    0.29
 -17   2  20   -0.08    0.29
 -17   2  21    0.13    0.29
 -17   2  22   -0.10    0.31
 -17   2  23   -0.13    0.33
 -17   2  24   -0.30    0.37
 -16   2  15    0.93    0.29
 -15   2  13   -0.08    0.28
 -11   2   9    0.53    0.24
  -9   2   8    0.34    0.24
  -4   2   8   47.35    0.49
  -2   2   9  142.01    0.72
  -1   2  32    0.28    0.28
   0   2  10    5.94    0.28
   0   2  31    0.40    0.27
   0   2  32    0.13    0.32
   1   2  11    0.36    0.24
   1   2  30    0.01    0.27
   1   2  31    0.23    0.30
   2   2  13   27.80    0.36
   2   2  29   -0.19    0.28
   2   2  30    0.48    0.26
   3   2  14   -0.17    0.23
   3   2  15    0.64    0.24
   3   2  27   -0.11    0.27
   3   2  28    0.15    0.26
   4   2  17   30.40    0.37
   4   2  18   62.93    0.47
   4   2  19   13.46    0.30
   4   2  20    2.68    0.24
   4   2  21    5.31    0.25
   4   2  22    9.26    0.27
   4   2  23   20.27    0.33
   4   2  24    5.76    0.27
   4   2  25    0.74    0.27
 -21   1  17    1.75    0.39
 -21   1  18    2.36    0.37
 -20   1  13    0.06    0.35
 -19   1  11    1.84    0.33
   0   1   4    0.13    0.29
   5   1   9    0.15    0.24
   6   1  31    0.20    0.30
   6   1  32    0.28    0.29
   7   1  13    0.62    0.25
   7   1  29    2.33    0.30
   7   1  30    0.08    0.28
   8   1  16    0.62    0.25
   8   1  25    0.30    0.25
   8   1  26   -0.27    0.26
   8   1  27    0.21    0.30
 -22   0  10    4.06    0.44
 -21   0   8    0.17    0.41
 -19   0   5    0.06    0.48
   7   0   6    0.03    0.26
  10   0  12    1.32    0.25
  10   0  30    1.06    0.33
  11   0  15    1.29    0.32
  11   0  16    0.47    0.26
  11   0  25    0.09    0.27
  11   0  26   -0.24    0.28
  11   0  27   -0.23    0.32
  -9  -1  -4   23.59    0.50
  -3  -1  -4   23.02    0.51
   0  -1  -3    0.07    0.27
  10  -1   6    0.35    0.36
  11  -1   8    3.78    0.36
  13  -1  14   10.67    0.36
  13  -1  28    2.55    0.34
  -2  -2  -6  152.16    0.85
   1  -2  -5    0.69    0.26
   3  -2  -4    0.80    0.26
  15  -2  14    0.19    0.32
 -17  -3  -5    0.69    0.29
 -13  -3  -7   15.93    0.40
 -10  -3  -8    0.03    0.23
  -2  -3  -8    0.60    0.25
   1  -3  -7   78.33    0.57
   3  -3  -6    5.20    0.27
   6  -3  -4    1.16    0.24
  10  -3   0    0.68    0.27
  16  -3  12    0.52    0.42
  17  -3  18    4.36    0.40
  17  -3  19    5.69    0.40
  17  -3  20    2.66    0.36
  17  -3  22    4.18    0.39
  17  -3  23   11.95    0.47
 -24  -4   0    0.96    0.47
 -18  -4  -6    0.74    0.31
 -12  -4  -9   23.94    0.36
  -7  -4 -10    0.76    0.23
  -6  -4 -10    2.51    0.24
   0  -4  -9   -0.06    0.17
   2  -4  -8    4.10    0.26
   4  -4  -7   25.93    0.37
   7  -4  -5   -0.28    0.25
   8  -4  -4   19.73    0.40
  14  -4   4    0.61    0.39
  18  -4  16    6.49    0.59
 -23  -5  -3    1.47    0.41
 -22  -5  -4    0.12    0.36
 -21  -5  -5    0.72    0.34
 -17  -5  -8    3.59    0.29
 -15  -5  -9   -0.05    0.25
 -12  -5 -10    0.59    0.26
  -8  -5 -11    0.80    0.24
  -7  -5 -11    4.27    0.25
  -6  -5 -11    0.23    0.24
  -5  -5 -11    4.75    0.26
  -4  -5 -11    0.79    0.24
   0  -5 -10    0.24    0.23
   6  -5  -7    0.37    0.25
  14  -5   2    0.53    0.32
  19  -5  17    2.66    0.70
 -22  -6  -5    0.16    0.38
 -21  -6  -6    0.10    0.37
 -20  -6  -7    0.44    0.33
 -17  -6  -9   -0.11    0.30
 -15  -6 -10    0.00    0.28
 -12  -6 -11    3.19    0.27
  -7  -6 -12   -0.02    0.23
  -6  -6 -12   19.19    0.33
  -5  -6 -12    0.12    0.24
   0  -6 -11   17.04    0.31
   6  -6  -8   39.93    0.41
 -18  -7  -9   -0.27    0.32
 -16  -7 -10    0.19    0.30
 -14  -7 -11    0.31    0.29
 -11  -7 -12    2.40    0.26
 -10  -7 -12    0.26    0.25
  -2  -7 -12    0.18    0.24
  -1  -7 -12    2.43    0.18
   2  -7 -11    0.14    0.18
   4  -7 -10    0.79    0.24
   7  -7  -8    2.45    0.25
   8  -7  -7    0.49    0.27
  12  -7  -3    0.43    0.30
  13  -7  -2    6.04    0.29
 -17  -8 -10   -0.14    0.33
 -15  -8 -11    0.07    0.30
 -12  -8 -12    0.34    0.30
  -7  -8 -13    0.56    0.25
  -6  -8 -13   12.71    0.30
  -1  -8 -12    0.64    0.24
   0  -8 -12   12.96    0.31
   2  -8 -11    0.80    0.23
   6  -8  -9    1.85    0.25
  14  -8  -1    1.99    0.32
 -13  -9 -12    0.96    0.34
 -12  -9 -12    0.40    0.32
  -8  -9 -13    0.29    0.26
  -7  -9 -13   -0.13    0.29
  -6  -9 -13    0.24    0.28
  -5  -9 -13    3.48    0.29
  -4  -9 -13    0.42    0.26
   0  -9 -12    0.61    0.27
   3  -9 -11    0.03    0.24
   6  -9  -9    0.78    0.25
   9  -9  -7    9.30    0.33
  10  -9  -6    0.45    0.28
  11  -9  -5    1.90    0.30
  14  -9  -1    0.12    0.38
  -7 -10 -13   -0.81    0.30
  -6 -10 -13    1.12    0.29
  -1 -10 -12    0.25    0.29
   0 -10 -12    0.67    0.26
   2 -10 -11    2.33    0.31
   4 -10 -10    0.28    0.26
   6 -10  -9    0.17    0.31
 -10   3  19    0.11    0.24
 -10   3  20    0.08    0.23
 -10   3  21    0.07    0.25
 -10   3  22   -0.11    0.24
 -10   3  23   -0.08    0.26
 -10   3  24    0.44    0.27
 -10   3  25   -0.20    0.25
  -9   3  18    0.59    0.25
  -9   3  19   13.64    0.31
  -9   3  20    4.91    0.26
  -9   3  21    9.66    0.29
  -9   3  22    1.65    0.26
  -9   3  23   12.53    0.32
  -9   3  24    7.95    0.31
  -9   3  25    0.69    0.28
  -9   3  26    4.66    0.27
  -8   3  17    0.57    0.24
  -8   3  18    1.72    0.25
  -8   3  19    1.46    0.25
  -8   3  23    0.27    0.24
  -8   3  24   -0.20    0.25
  -8   3  25    0.00    0.27
  -8   3  26    0.23    0.28
  -8   3  27    0.26    0.26
  -7   3  17   28.17    0.36
  -7   3  18   17.88    0.32
  -7   3  24    1.46    0.25
  -7   3  25    0.22    0.27
  -7   3  26    6.27    0.29
  -7   3  27    0.31    0.25
  -6   3  16    0.80    0.24
  -6   3  17    1.31    0.25
  -6   3  18    0.20    0.25
  -6   3  24    0.00    0.18
  -6   3  25   -0.08    0.26
  -6   3  26    0.05    0.25
  -6   3  27    0.07    0.25
  -5   3  17   31.58    0.37
  -5   3  18    5.02    0.26
  -5   3  19   11.46    0.24
  -5   3  24    0.32    0.23
  -5   3  25    2.69    0.27
  -5   3  26   12.90    0.32
  -5   3  27    1.76    0.25
  -4   3  17    1.00    0.24
  -4   3  18    0.03    0.25
  -4   3  19   -0.07    0.25
  -4   3  20    0.48    0.23
  -4   3  21    1.22    0.23
  -4   3  22    0.30    0.23
  -4   3  23    0.31    0.23
  -4   3  24   -0.21    0.26
  -4   3  25   -0.32    0.26
  -4   3  26    0.15    0.26
  -3   3  18    2.37    0.24
  -3   3  19    1.77    0.25
  -3   3  20    0.38    0.25
  -3   3  21    0.44    0.24
  -3   3  22   11.44    0.29
  -3   3  23    5.73    0.26
  -3   3  24    4.76    0.27
  -3   3  25   11.49    0.29
  -2   3  21    0.44    0.23
  -2   3  22    0.14    0.22
  -2   3  23    0.00    0.22
 -18   2  20    0.41    0.34
 -18   2  21    3.38    0.36
 -18   2  22    2.63    0.35
 -18   2  23    0.65    0.37
 -17   2  16    0.06    0.32
 -17   2  17    0.00    0.29
 -16   2  14   11.89    0.33
 -15   2  12    0.86    0.29
 -14   2  11   19.46    0.37
 -13   2  10    0.18    0.25
 -12   2   9   24.56    0.43
 -10   2   8   17.53    0.36
  -7   2   7    0.78    0.28
  -6   2   7  114.78    0.74
  -3   2   8    0.48    0.18
  -1   2   9    0.38    0.25
   1   2  32    0.21    0.32
   2   2  12    3.69    0.26
   2   2  31    0.35    0.30
   3   2  13    0.21    0.23
   3   2  29   -0.10    0.28
   3   2  30    0.15    0.28
   4   2  15    5.18    0.27
   4   2  16    5.92    0.27
   4   2  26    2.69    0.21
   4   2  27    2.62    0.27
   4   2  28    5.99    0.30
   5   2  19    0.22    0.24
   5   2  20    0.20    0.25
   5   2  21    0.15    0.24
   5   2  22    0.25    0.25
   5   2  23    0.32    0.25
   5   2  24    0.25    0.25
   5   2  25    0.25    0.23
 -21   1  15    2.73    0.36
 -21   1  16    2.98    0.35
 -18   1   9    0.11    0.30
 -13   1   4   11.43    0.45
 -11   1   3    1.11    0.31
  -2   1   3    0.17    0.28
   6   1  10    0.39    0.24
   7   1  12    2.81    0.26
   7   1  31    2.17    0.33
   8   1  15    0.08    0.23
   8   1  28   -0.39    0.29
   8   1  29    0.21    0.28
   9   1  19    4.19    0.25
   9   1  20    4.25    0.25
   9   1  21    3.85    0.28
   9   1  22    8.29    0.30
   9   1  23    1.88    0.27
   9   1  24    3.66    0.25
 -23   0  12    0.24    0.43
  -3   0  -1    0.03    0.41
   9   0   9    0.07    0.26
  11   0  14    0.19    0.30
  11   0  28   -0.01    0.31
  11   0  29    0.10    0.33
  12   0  21    7.05    0.33
  12   0  22    0.95    0.31
 -12  -1  -3    0.24    0.31
  -8  -1  -4    0.18    0.28
  -4  -1  -4    0.22    0.26
  12  -1  10    0.15    0.30
  13  -1  13   23.20    0.45
  14  -1  18   -0.18    0.30
  14  -1  19    0.27    0.29
  14  -1  20    0.04    0.25
  14  -1  21    0.09    0.26
  14  -1  22   -0.06    0.26
  14  -1  23    0.22    0.29
  14  -1  24    0.23    0.34
  14  -1  25   -0.06    0.34
 -21  -2   1    0.11    0.46
 -18  -2  -2    6.81    0.41
 -15  -2  -4    0.21    0.28
 -13  -2  -5    0.09    0.28
 -10  -2  -6   22.43    0.40
  14  -2  10   12.31    0.54
 -18  -3  -4   -0.06    0.32
 -15  -3  -6   12.28    0.37
  -9  -3  -8   38.69    0.44
  -8  -3  -8    0.88    0.25
  -4  -3  -8    0.55    0.25
  -3  -3  -8   19.84    0.31
  12  -3   3    0.08    0.38
  17  -3  17    4.39    0.41
 -19  -4  -5    0.25    0.32
 -16  -4  -7    0.67    0.28
 -14  -4  -8    6.09    0.29
 -11  -4  -9    0.31    0.24
  -1  -4  -9    0.69    0.23
 -18  -5  -7    0.24    0.31
 -14  -5  -9    0.11    0.29
 -11  -5 -10   47.34    0.43
  -1  -5 -10    6.10    0.26
   2  -5  -9    1.97    0.25
   4  -5  -8    0.65    0.24
   7  -5  -6   21.36    0.35
  15  -5   4    3.82    0.38
 -18  -6  -8    0.20    0.30
 -16  -6  -9   11.02    0.36
 -14  -6 -10    0.43    0.27
 -11  -6 -11    0.54    0.25
 -10  -6 -11    3.68    0.28
  -2  -6 -11    3.34    0.26
  -1  -6 -11    0.44    0.25
   2  -6 -10    2.78    0.19
   4  -6  -9   11.86    0.30
   7  -6  -7    0.52    0.23
   8  -6  -6   29.09    0.40
  17  -6   7    0.07    0.43
  18  -6  10    2.83    0.58
 -20  -7  -7   -0.21    0.38
 -19  -7  -8    0.12    0.33
 -17  -7  -9    5.33    0.38
 -15  -7 -10    6.07    0.33
 -13  -7 -11    0.72    0.28
  -9  -7 -12    9.54    0.29
  -8  -7 -12    0.77    0.25
  -7  -7 -12    0.85    0.25
  -6  -7 -12    0.58    0.25
  -5  -7 -12    6.60    0.27
  -4  -7 -12    0.73    0.24
  -3  -7 -12    0.05    0.23
   0  -7 -11    0.88    0.23
   1  -7 -11    3.31    0.19
   3  -7 -10    3.59    0.26
   5  -7  -9   15.00    0.32
   9  -7  -6    1.15    0.26
  10  -7  -5    1.11    0.25
  11  -7  -4   14.40    0.33
 -16  -8 -10   -0.09    0.32
 -14  -8 -11    0.60    0.29
 -11  -8 -12    0.27    0.24
 -10  -8 -12    2.07    0.29
  -9  -8 -12    0.37    0.29
  -3  -8 -12    0.75    0.25
  -2  -8 -12    1.14    0.26
   1  -8 -11    1.04    0.26
   4  -8 -10    2.91    0.25
   7  -8  -8    0.35    0.25
   8  -8  -7    7.08    0.31
  13  -8  -2    0.06    0.29
  16  -8   3    1.00    0.34
  17  -8   5    0.08    0.39
 -14  -9 -11   -0.58    0.32
 -11  -9 -12    1.18    0.29
 -10  -9 -12    0.29    0.29
  -3  -9 -12    0.40    0.25
  -2  -9 -12    0.32    0.26
  -1  -9 -12    7.65    0.29
   1  -9 -11    1.70    0.25
   2  -9 -11    0.04    0.25
   4  -9 -10    0.71    0.28
   7  -9  -8    2.29    0.28
  13  -9  -2    1.36    0.34
  -9 -10 -12    0.31    0.33
  -8 -10 -12    2.07    0.29
  -4 -10 -12    0.64    0.27
  -3 -10 -12    0.48    0.29
  -2 -10 -12    5.38    0.31
   1 -10 -11    0.55    0.30
   3 -10 -10    0.06    0.26
   5 -10  -9   -0.01    0.28
   7 -10  -8    0.04    0.30
   8 -10  -7    0.20    0.30
   9 -10  -6    0.45    0.31
  11 -10  -4    0.10    0.36
  12 -10  -3    0.32    0.37
  13 -10  -2   -0.13    0.32
   2 -11 -10   -0.26    0.30
 -12   3  20    0.01    0.25
 -12   3  21    0.24    0.26
 -12   3  22    0.13    0.27
 -12   3  23   -0.22    0.29
 -12   3  24    0.23    0.28
 -12   3  25    0.11    0.30
 -11   3  18    9.12    0.29
 -11   3  19    4.78    0.28
 -11   3  20    7.74    0.28
 -11   3  21   -0.07    0.22
 -11   3  22    1.12    0.23
 -11   3  23    3.63    0.26
 -11   3  24    0.32    0.26
 -11   3  25    1.27    0.28
 -11   3  26    1.23    0.30
 -11   3  27    3.67    0.29
 -10   3  16    0.10    0.25
 -10   3  17    0.13    0.25
 -10   3  18   -0.04    0.22
 -10   3  26    0.03    0.27
 -10   3  27   -0.03    0.29
 -10   3  28    0.27    0.27
  -9   3  16    6.38    0.26
  -9   3  17   17.98    0.31
  -9   3  27    2.06    0.29
  -9   3  28    0.11    0.29
  -9   3  29   -0.08    0.27
  -8   3  15    0.18    0.24
  -8   3  16    0.19    0.24
  -8   3  28   -0.08    0.30
  -8   3  29    0.44    0.30
  -7   3  15    4.79    0.26
  -7   3  16    4.96    0.21
  -7   3  28    0.91    0.30
  -7   3  29    3.92    0.31
  -6   3  15    0.59    0.24
  -6   3  28    0.11    0.29
  -6   3  29   -0.05    0.29
  -5   3  15    0.92    0.24
  -5   3  16   40.22    0.39
  -5   3  28    0.14    0.28
  -5   3  29    0.01    0.29
  -4   3  16    0.53    0.24
  -4   3  27    0.54    0.24
  -4   3  28   -0.25    0.28
  -4   3  29    0.23    0.26
  -3   3  16   10.23    0.29
  -3   3  17   36.84    0.39
  -3   3  26    2.73    0.26
  -3   3  27    1.05    0.28
  -3   3  28    0.61    0.28
  -2   3  17    1.00    0.24
  -2   3  18    0.85    0.25
  -2   3  19    0.40    0.23
  -2   3  20    0.34    0.19
  -2   3  24    0.13    0.24
  -2   3  25    0.17    0.25
  -2   3  26    0.11    0.25
  -2   3  27    0.14    0.25
  -1   3  19   11.84    0.30
  -1   3  20    4.88    0.26
  -1   3  21   14.93    0.30
  -1   3  22    3.38    0.25
  -1   3  23    0.66    0.23
  -1   3  24    0.42    0.25
  -1   3  25    6.66    0.28
 -18   2  17    0.11    0.32
 -18   2  18    1.99    0.34
 -18   2  19    0.57    0.30
 -17   2  15    0.23    0.25
 -16   2  13    0.41    0.25
 -14   2  10   11.21    0.37
 -11   2   8    0.06    0.24
  -9   2   7    1.12    0.29
  -8   2   7  159.82    0.86
  -5   2   7    0.35    0.23
  -4   2   7   68.73    0.57
  -2   2   8   85.59    0.59
   0   2   9  109.12    0.65
   1   2  10    0.36    0.24
   2   2  11   86.83    0.57
   2   2  32    2.79    0.30
   3   2  31    0.31    0.31
   3   2  32    0.31    0.29
   4   2  14   18.65    0.33
   4   2  29    1.05    0.28
   4   2  30    3.10    0.31
   5   2  17    0.72    0.24
   5   2  18    0.79    0.23
   5   2  26    0.05    0.27
   5   2  27   -0.04    0.27
   5   2  28   -0.07    0.25
 -21   1  14   12.87    0.45
 -20   1  12    0.30    0.33
 -19   1  10    1.21    0.33
  -6   1   2    0.20    0.34
   2   1   5    0.07    0.30
   3   1   6   80.98    0.71
   4   1   7    0.42    0.25
   5   1   8   36.35    0.47
   7   1  11    8.55    0.33
   8   1  14    0.15    0.24
   8   1  30    0.35    0.33
   8   1  31   -0.34    0.33
   9   1  17    4.04    0.25
   9   1  18   13.35    0.30
   9   1  25    8.65    0.29
   9   1  26    2.79    0.29
   9   1  27    0.02    0.29
 -20   0   6   17.79    0.67
  -9   0  -1    0.11    0.49
   8   0   7    6.15    0.34
  10   0  11   10.03    0.32
  12   0  18   16.61    0.38
  12   0  19    0.82    0.26
  12   0  20    6.60    0.30
  12   0  23    0.58    0.28
  12   0  24    3.56    0.30
  12   0  25    1.95    0.31
  12   0  26    2.28    0.36
 -17  -1   0    1.22    0.47
 -14  -1  -2    0.17    0.35
  -7  -1  -4   31.19    0.55
  -6  -1  -4    0.39    0.28
  -5  -1  -4   31.74    0.53
  14  -1  17    0.33    0.31
  14  -1  26   -0.12    0.32
  14  -1  27   -0.08    0.37
 -20  -2   0    3.67    0.45
 -19  -2  -1    0.04    0.38
  -9  -2  -6    1.28    0.25
  -8  -2  -6  159.75    0.89
  -4  -2  -6    6.43    0.28
  -3  -2  -6    0.61    0.17
   4  -2  -3  262.84    1.29
  15  -2  13    0.15    0.34
  16  -2  19    0.99    0.37
  16  -2  20    0.49    0.35
  16  -2  21    1.03    0.33
  16  -2  22    0.38    0.33
  16  -2  23    0.32    0.33
  16  -2  24    0.17    0.38
  16  -2  25    0.70    0.37
 -25  -3   4    1.50    0.68
 -23  -3   1    2.30    0.47
 -19  -3  -3    1.57    0.35
 -12  -3  -7    0.18    0.24
  -7  -3  -8   16.33    0.34
  -6  -3  -8   -0.07    0.23
  -5  -3  -8   20.92    0.35
   0  -3  -7    0.12    0.17
   2  -3  -6    0.26    0.24
   4  -3  -5    0.40    0.23
  17  -3  16    7.35    0.48
 -23  -4  -1    0.04    0.41
 -22  -4  -2    5.07    0.42
 -21  -4  -3    0.03    0.35
 -20  -4  -4    0.38    0.32
 -17  -4  -6   -0.07    0.29
 -13  -4  -8   -0.05    0.28
 -10  -4  -9   23.09    0.35
  -9  -4  -9    0.10    0.24
  -3  -4  -9    0.15    0.23
  -2  -4  -9   14.42    0.26
   1  -4  -8    1.91    0.25
   3  -4  -7    0.75    0.24
   5  -4  -6    0.85    0.25
  12  -4   1    2.65    0.34
  18  -4  15    4.85    0.63
 -19  -5  -6    6.93    0.35
 -16  -5  -8   -0.05    0.25
 -10  -5 -10    0.49    0.24
  -3  -5 -10   28.05    0.35
  -2  -5 -10    0.72    0.24
   1  -5  -9   22.78    0.34
   5  -5  -7   22.64    0.35
   8  -5  -5    0.40    0.24
   9  -5  -4   13.19    0.32
  10  -5  -3    0.97    0.27
  17  -5   9    2.50    0.58
 -20  -6  -6    0.96    0.37
 -19  -6  -7    0.24    0.31
 -17  -6  -8    0.37    0.32
 -13  -6 -10    0.22    0.26
  -9  -6 -11   -0.19    0.25
  -8  -6 -11    8.94    0.29
  -7  -6 -11    0.12    0.23
  -6  -6 -11    5.51    0.25
  -5  -6 -11    0.32    0.24
  -4  -6 -11   29.06    0.36
  -3  -6 -11    0.70    0.25
   1  -6 -10    0.88    0.25
   3  -6  -9    0.70    0.24
   5  -6  -8    0.75    0.24
   9  -6  -5    0.30    0.23
  10  -6  -4   25.29    0.39
  11  -6  -3    0.29    0.26
  14  -6   1    9.24    0.37
 -18  -7  -8   -0.12    0.36
 -14  -7 -10    0.11    0.31
 -12  -7 -11    0.02    0.26
 -11  -7 -11   13.17    0.31
  -1  -7 -11    3.19    0.26
   2  -7 -10    0.38    0.25
   4  -7  -9    0.48    0.25
   6  -7  -8    0.39    0.24
  13  -7  -1    1.47    0.28
  15  -7   2    0.81    0.32
  17  -7   6    0.36    0.38
 -17  -8  -9   -0.13    0.33
 -15  -8 -10   -0.03    0.29
 -13  -8 -11   -0.13    0.30
 -12  -8 -11    2.74    0.27
  -8  -8 -12    0.93    0.26
  -7  -8 -12    0.49    0.27
  -6  -8 -12    5.91    0.28
  -5  -8 -12    0.41    0.25
  -4  -8 -12    0.63    0.25
   0  -8 -11    6.85    0.28
   3  -8 -10    1.06    0.26
   5  -8  -9    0.03    0.26
   9  -8  -6    0.57    0.27
  10  -8  -5    0.32    0.28
  11  -8  -4    0.17    0.28
  12  -8  -3    1.01    0.27
  14  -8   0    8.49    0.36
 -13  -9 -11    0.86    0.33
 -12  -9 -11    0.11    0.33
  -9  -9 -12    0.98    0.26
  -8  -9 -12   -0.09    0.28
  -7  -9 -12    1.39    0.30
  -6  -9 -12    0.34    0.28
  -5  -9 -12   10.57    0.32
  -4  -9 -12    0.98    0.29
   0  -9 -11    0.27    0.27
   3  -9 -10    0.18    0.26
   5  -9  -9    1.29    0.28
   8  -9  -7    0.18    0.27
   9  -9  -6    0.64    0.28
  10  -9  -5    0.10    0.28
  11  -9  -4    1.17    0.29
  12  -9  -3    0.27    0.29
  14  -9   0   -0.20    0.36
  -7 -10 -12   -0.03    0.29
  -6 -10 -12    0.55    0.28
  -5 -10 -12   -0.10    0.26
  -1 -10 -11   -0.22    0.28
   0 -10 -11    0.07    0.29
   2 -10 -10   12.67    0.34
   4 -10  -9    0.59    0.27
   6 -10  -8    0.24    0.30
  10 -10  -5    0.83    0.31
   1 -11 -10    0.24    0.33
 -13   3  19    0.95    0.29
 -13   3  20    0.30    0.27
 -13   3  21    2.62    0.28
 -13   3  22    0.88    0.29
 -13   3  23    2.57    0.30
 -13   3  24    1.44    0.29
 -13   3  25    0.57    0.31
 -13   3  26    3.65    0.31
 -12   3  17   -0.16    0.25
 -12   3  18    0.28    0.25
 -12   3  19    0.41    0.26
 -12   3  26    0.40    0.30
 -12   3  27    0.16    0.32
 -12   3  28   -0.01    0.32
 -11   3  16    2.81    0.24
 -11   3  17    6.78    0.27
 -11   3  28    2.60    0.32
 -10   3  15    0.19    0.23
 -10   3  29   -0.07    0.31
  -9   3  14    0.82    0.26
  -9   3  15    2.53    0.25
  -8   3  14    0.41    0.23
  -8   3  30    0.00    0.32
  -7   3  14    8.14    0.28
  -7   3  30    1.77    0.29
  -6   3  14   -0.02    0.23
  -6   3  30   -0.08    0.28
  -6   3  31    0.03    0.33
  -5   3  14    3.54    0.25
  -5   3  30    1.78    0.28
  -5   3  31    1.58    0.33
  -4   3  14   -0.12    0.24
  -4   3  15    0.09    0.16
  -4   3  30    0.05    0.30
  -4   3  31    0.01    0.31
  -3   3  15    1.78    0.23
  -3   3  29    1.03    0.27
  -3   3  30    3.44    0.31
  -2   3  16    0.31    0.25
  -2   3  28    0.04    0.25
  -2   3  29   -0.17    0.28
  -2   3  30    0.38    0.26
  -1   3  17   11.14    0.28
  -1   3  18    2.64    0.24
  -1   3  26    0.37    0.18
  -1   3  27    2.04    0.27
  -1   3  28    0.73    0.28
   0   3  18    0.39    0.23
   0   3  19    0.13    0.23
   0   3  20    0.07    0.25
   0   3  21    0.33    0.24
   0   3  22    0.55    0.21
   0   3  23    0.57    0.25
   0   3  24    0.30    0.25
   0   3  25   -0.09    0.26
   0   3  26    0.22    0.27
   0   3  27   -0.07    0.24
   1   3  22    3.58    0.24
   1   3  23    0.99    0.23
 -19   2  20   -0.01    0.33
 -19   2  21    0.17    0.37
 -19   2  22    0.04    0.34
 -18   2  16    4.92    0.33
 -17   2  14    0.19    0.25
 -16   2  12   15.71    0.40
 -15   2  11    0.13    0.24
 -13   2   9    0.05    0.24
 -12   2   8    0.37    0.28
 -10   2   7    3.83    0.31
  -3   2   7    0.76    0.25
  -1   2   8    0.14    0.25
   3   2  12    0.39    0.17
   4   2  13    1.87    0.25
   4   2  31    0.06    0.31
   4   2  32    0.45    0.29
   5   2  15    0.06    0.23
   5   2  16   -0.13    0.23
   5   2  29   -0.09    0.28
   5   2  30    0.25    0.29
   6   2  18   24.31    0.35
   6   2  19   12.89    0.31
   6   2  20    3.36    0.25
   6   2  21    5.07    0.26
   6   2  22    2.01    0.23
   6   2  23    7.97    0.27
   6   2  24    3.39    0.26
   6   2  25    5.63    0.28
   6   2  26    1.12    0.26
   6   2  27    0.35    0.25
 -22   1  17    0.19    0.37
 -18   1   8    0.27    0.32
 -17   1   7    1.97    0.33
 -16   1   6    0.05    0.31
 -15   1   5    8.60    0.45
  -8   1   2    0.39    0.32
  -7   1   2   13.82    0.48
  -5   1   2  125.48    1.20
   6   1   9    0.27    0.23
   8   1  13    0.16    0.24
   9   1  16   81.62    0.56
   9   1  28    0.06    0.30
   9   1  29    0.18    0.30
  10   1  21    0.34    0.29
  10   1  22   -0.02    0.29
  10   1  23    0.13    0.30
  10   1  24    0.02    0.29
 -23   0  11    0.14    0.41
 -22   0   9    2.57    0.43
  11   0  13    0.03    0.25
  12   0  16   46.34    0.52
  12   0  17    6.19    0.30
  12   0  27    1.86    0.32
  12   0  28    0.38    0.32
  13  -1  12    0.29    0.32
  14  -1  16    0.32    0.29
 -12  -2  -5   20.90    0.43
  -7  -2  -6    2.05    0.25
  -6  -2  -6   13.85    0.34
  -5  -2  -6    0.79    0.22
   0  -2  -5  127.84    0.80
   2  -2  -4  111.06    0.81
  16  -2  18    2.26    0.33
 -22  -3   0    0.06    0.40
 -21  -3  -1    1.78    0.39
 -20  -3  -2    0.30    0.35
 -16  -3  -5    0.12    0.28
 -14  -3  -6    0.30    0.30
 -11  -3  -7   24.79    0.41
  -1  -3  -7   79.91    0.57
 -15  -4  -7   -0.17    0.24
  -8  -4  -9    5.63    0.28
  -7  -4  -9   -0.02    0.24
  -6  -4  -9   12.41    0.30
  -5  -4  -9    0.34    0.23
  -4  -4  -9    2.31    0.25
   0  -4  -8  176.69    0.75
   6  -4  -5   17.40    0.35
 -23  -5  -2    0.30    0.41
 -22  -5  -3    0.04    0.38
 -21  -5  -4    0.76    0.34
 -20  -5  -5    0.41    0.32
 -17  -5  -7    4.45    0.32
 -15  -5  -8    8.86    0.34
 -13  -5  -9    7.54    0.28
  -9  -5 -10    4.33    0.26
  -8  -5 -10    0.18    0.24
  -7  -5 -10    0.01    0.23
  -6  -5 -10    0.36    0.23
  -5  -5 -10    3.16    0.25
  -4  -5 -10    0.85    0.23
   0  -5  -9    0.38    0.23
   3  -5  -8   34.51    0.39
   6  -5  -6    0.38    0.28
  13  -5   1    4.18    0.32
 -22  -6  -4    0.04    0.37
 -21  -6  -5    0.53    0.37
 -15  -6  -9   -0.20    0.28
 -12  -6 -10   10.11    0.31
  -1  -6 -10    0.62    0.24
   0  -6 -10    1.16    0.23
   2  -6  -9   20.44    0.32
   6  -6  -7   21.38    0.34
  15  -6   3    0.31    0.31
  16  -6   5    2.84    0.37
 -19  -7  -7    0.71    0.36
 -16  -7  -9   -0.26    0.29
 -13  -7 -10    1.69    0.30
 -10  -7 -11    0.26    0.25
  -9  -7 -11    5.37    0.27
  -3  -7 -11   17.05    0.32
  -2  -7 -11    0.50    0.24
   1  -7 -10    0.20    0.25
   5  -7  -8   12.72    0.28
   7  -7  -7    0.11    0.23
   8  -7  -6   -0.11    0.22
  12  -7  -2    0.79    0.31
  16  -7   4    0.03    0.35
  18  -7   9   -0.07    0.44
 -16  -8  -9    0.88    0.34
 -14  -8 -10    1.09    0.30
 -11  -8 -11    0.05    0.26
  -2  -8 -11    0.86    0.26
  -1  -8 -11    0.21    0.26
   2  -8 -10    6.24    0.28
   4  -8  -9    2.24    0.26
   6  -8  -8    6.05    0.25
   7  -8  -7    0.84    0.25
  13  -8  -1    0.04    0.33
 -14  -9 -10   -0.08    0.32
 -11  -9 -11    0.23    0.28
 -10  -9 -11    0.14    0.30
  -2  -9 -11    0.15    0.26
  -1  -9 -11    1.75    0.27
   2  -9 -10   -0.01    0.28
   4  -9  -9    0.40    0.27
   6  -9  -8    0.43    0.24
   7  -9  -7    4.23    0.29
  13  -9  -1    1.44    0.35
 -10 -10 -11    0.73    0.32
  -9 -10 -11    0.05    0.32
  -4 -10 -11   -0.12    0.27
  -3 -10 -11    0.08    0.29
  -2 -10 -11    1.55    0.31
   1 -10 -10   -0.17    0.29
   3 -10  -9    0.09    0.26
   5 -10  -8    0.07    0.25
   7 -10  -7    0.06    0.30
   8 -10  -6    0.22    0.29
   9 -10  -5    0.12    0.31
  11 -10  -3    0.31    0.36
  12 -10  -2    0.95    0.37
  13 -10  -1    0.08    0.33
  -1 -11 -10    0.37    0.29
   0 -11 -10    0.18    0.33
   2 -11  -9    0.24    0.32
   4 -11  -8    0.11    0.28
   6 -11  -7   -0.02    0.34
 -14   3  19    0.10    0.28
 -14   3  20    0.05    0.27
 -14   3  21   -0.03    0.27
 -14   3  22   -0.13    0.29
 -14   3  23    0.21    0.29
 -14   3  24    0.07    0.29
 -14   3  25    0.38    0.30
 -14   3  26   -0.04    0.31
 -13   3  17    4.86    0.29
 -13   3  18    6.16    0.28
 -13   3  27    0.13    0.32
 -12   3  16    0.19    0.24
 -11   3  15    0.27    0.23
 -10   3  14    0.02    0.24
  -9   3  13    6.70    0.30
  -8   3  13    0.21    0.25
  -7   3  13   10.83    0.30
  -6   3  13    0.18    0.24
  -5   3  13    8.89    0.29
  -4   3  13   -0.01    0.23
  -3   3  14    2.69    0.24
  -3   3  31    0.61    0.29
  -2   3  14    0.51    0.22
  -2   3  15    0.51    0.22
  -2   3  31    0.44    0.31
  -1   3  15   16.44    0.31
  -1   3  16   14.92    0.30
  -1   3  29    3.97    0.27
  -1   3  30    0.69    0.31
  -1   3  31   -0.23    0.30
   0   3  17    0.91    0.23
   0   3  28    0.22    0.28
   0   3  29    0.29    0.28
   1   3  18    2.06    0.24
   1   3  19   11.24    0.30
   1   3  20    5.00    0.27
   1   3  21   14.63    0.29
   1   3  24    0.60    0.25
   1   3  25    6.82    0.29
   1   3  26    0.73    0.26
   1   3  27    2.37    0.28
   1   3  28    0.21    0.26
   2   3  22    0.25    0.22
   2   3  23    0.18    0.23
   2   3  24    0.34    0.24
 -19   2  18    0.39    0.34
 -19   2  19    0.14    0.31
 -18   2  15    0.96    0.32
 -17   2  13    0.19    0.30
 -15   2  10    0.12    0.28
  -2   2   7   78.90    0.61
   1   2   9    0.34    0.24
   2   2  10   10.59    0.30
   3   2  11    0.22    0.25
   5   2  14    0.25    0.23
   5   2  31    0.42    0.30
   5   2  32   -0.01    0.28
   6   2  17   19.63    0.33
   6   2  28    0.83    0.27
   6   2  29    0.60    0.28
   7   2  21    0.39    0.24
   7   2  22    0.08    0.24
   7   2  23    0.65    0.24
   7   2  24    0.12    0.25
   7   2  25   -0.02    0.23
 -22   1  16    0.13    0.35
 -21   1  13    3.93    0.38
 -20   1  11   -0.06    0.32
 -19   1   9    0.03    0.32
  -1   1   3   73.30    0.83
   1   1   4  102.55    0.90
   7   1  10   31.81    0.45
   8   1  12    0.17    0.23
   9   1  15    5.36    0.27
   9   1  30    1.23    0.31
  10   1  18    0.20    0.28
  10   1  19    0.30    0.25
  10   1  20    0.16    0.25
  10   1  25    0.13    0.28
  10   1  26    0.29    0.28
  10   1  27    0.06    0.28
  10   1  28   -0.06    0.31
 -24   0  13    0.76    0.50
 -12   0   0    2.97    0.71
  10   0  10    0.26    0.27
  12   0  29    2.94    0.35
  13   0  22    0.14    0.31
  13   0  23    0.14    0.31
  13   0  24   -0.13    0.33
 -11  -1  -3    1.06    0.30
  -1  -1  -3   74.43    0.83
  14  -1  15    0.07    0.28
  15  -1  22    1.79    0.32
  15  -1  23    0.42    0.33
 -16  -2  -3   17.03    0.43
 -14  -2  -4    5.14    0.33
  16  -2  17    1.62    0.33
 -10  -3  -7    0.77    0.27
  -2  -3  -7    1.23    0.25
   1  -3  -6   59.45    0.52
   5  -3  -4    7.96    0.29
  16  -3  11    0.18    0.62
  17  -3  15    2.22    0.43
 -18  -4  -5    1.26    0.31
 -12  -4  -8    8.59    0.28
  -1  -4  -8    1.70    0.25
   2  -4  -7    6.30    0.28
   4  -4  -6   35.14    0.41
   7  -4  -4    0.36    0.25
  11  -4   0    0.90    0.28
 -18  -5  -6    0.13    0.31
 -12  -5  -9    0.20    0.22
  -1  -5  -9   22.58    0.34
   2  -5  -8    1.96    0.23
   4  -5  -7    0.42    0.25
   7  -5  -5   24.93    0.41
 -18  -6  -7   -0.01    0.30
 -16  -6  -8    1.44    0.28
 -14  -6  -9    0.93    0.27
 -11  -6 -10    0.61    0.24
 -10  -6 -10    3.59    0.26
  -2  -6 -10    2.69    0.25
   4  -6  -8   11.53    0.29
   7  -6  -6    0.82    0.23
 -20  -7  -6    0.04    0.38
 -17  -7  -8    2.58    0.33
 -15  -7  -9    1.62    0.28
 -12  -7 -10    0.09    0.25
  -8  -7 -11    0.35    0.23
  -7  -7 -11   16.04    0.32
  -6  -7 -11    0.34    0.25
  -5  -7 -11    0.33    0.24
  -4  -7 -11    0.43    0.17
   0  -7 -10   -0.01    0.24
   3  -7  -9    0.68    0.23
   6  -7  -7    0.76    0.27
   9  -7  -5    4.69    0.26
  10  -7  -4    1.34    0.25
  11  -7  -3    5.06    0.28
 -13  -8 -10   -0.45    0.29
 -10  -8 -11    0.17    0.25
  -9  -8 -11    0.25    0.27
  -8  -8 -11    2.58    0.28
  -7  -8 -11    0.31    0.25
  -6  -8 -11    2.68    0.26
  -5  -8 -11   -0.01    0.27
  -4  -8 -11    6.23    0.29
  -3  -8 -11    0.50    0.25
   1  -8 -10    0.51    0.25
   3  -8  -9    1.10    0.25
   5  -8  -8    0.52    0.26
   8  -8  -6    4.54    0.27
   9  -8  -5    0.43    0.26
  10  -8  -4    0.98    0.31
  11  -8  -3   -0.03    0.32
  12  -8  -2    1.04    0.31
  16  -8   4    1.18    0.36
  17  -8   6   -0.01    0.39
 -13  -9 -10    1.62    0.34
  -9  -9 -11    0.12    0.28
  -8  -9 -11    0.37    0.28
  -7  -9 -11    0.76    0.27
  -6  -9 -11    0.24    0.28
  -5  -9 -11    0.35    0.28
  -4  -9 -11    0.54    0.27
  -3  -9 -11    0.16    0.26
   0  -9 -10    1.58    0.25
   1  -9 -10    1.96    0.28
   3  -9  -9   12.92    0.32
   5  -9  -8    0.16    0.26
   8  -9  -6    0.34    0.28
   9  -9  -5    0.35    0.28
  10  -9  -4    0.07    0.31
  11  -9  -3    1.14    0.33
  12  -9  -2    0.28    0.29
  16  -9   4    0.30    0.37
  -8 -10 -11    0.31    0.28
  -7 -10 -11   -0.02    0.28
  -6 -10 -11    0.82    0.27
  -5 -10 -11    0.15    0.26
  -1 -10 -10    0.12    0.26
   0 -10 -10    0.04    0.28
   2 -10  -9    0.65    0.27
   4 -10  -8    1.89    0.31
   6 -10  -7    0.99    0.29
  10 -10  -4    3.32    0.32
  -2 -11 -10    0.25    0.31
   1 -11  -9    1.06    0.32
   3 -11  -8    1.10    0.28
   5 -11  -7    0.32    0.32
 -15   3  19    0.45    0.31
 -15   3  20    0.70    0.28
 -15   3  21   -0.05    0.27
 -15   3  22    2.23    0.30
 -15   3  23    1.48    0.31
 -15   3  24    6.14    0.34
 -15   3  25    0.07    0.31
 -14   3  17   -0.30    0.31
 -14   3  18   -0.19    0.28
 -13   3  16    5.17    0.28
 -12   3  15    0.46    0.23
 -11   3  14    3.19    0.24
 -10   3  13    0.03    0.23
  -8   3  12    0.13    0.25
  -7   3  12    5.49    0.27
  -6   3  12    0.13    0.23
  -5   3  12   14.88    0.31
  -3   3  13    8.44    0.28
  -1   3  14   14.25    0.30
   0   3  15   -0.11    0.23
   0   3  16    0.16    0.17
   0   3  30   -0.17    0.27
   0   3  31    0.09    0.31
   0   3  32    0.25    0.28
   1   3  17   11.29    0.29
   1   3  29    2.95    0.30
   1   3  30    1.03    0.30
   2   3  19    0.20    0.24
   2   3  20    0.06    0.25
   2   3  21    0.28    0.23
   2   3  25    0.03    0.24
   2   3  26    0.18    0.26
   2   3  27    0.57    0.26
   2   3  28    0.17    0.27
   3   3  23    4.09    0.25
   3   3  24    3.83    0.25
 -20   2  20    0.94    0.37
 -19   2  16    0.16    0.32
 -19   2  17    0.49    0.30
 -18   2  14    0.91    0.31
 -17   2  12   -0.04    0.29
 -16   2  11    0.25    0.23
 -14   2   9   36.69    0.47
 -13   2   8    0.06    0.30
 -11   2   7    0.08    0.23
  -8   2   6  157.35    0.90
  -7   2   6    1.74    0.25
  -6   2   6   13.78    0.33
  -5   2   6    0.93    0.24
  -4   2   6    6.46    0.29
   0   2   8   86.84    0.59
   4   2  12   27.08    0.36
   5   2  13   -0.01    0.24
   6   2  15   23.48    0.36
   6   2  16    6.45    0.26
   6   2  30    0.65    0.27
   6   2  31    1.47    0.35
   7   2  18    0.08    0.25
   7   2  19    0.03    0.23
   7   2  20    0.66    0.22
   7   2  26    0.08    0.24
   7   2  27    0.10    0.26
   7   2  28    0.43    0.28
   7   2  29    0.07    0.32
 -22   1  15    0.07    0.35
 -21   1  12    0.55    0.39
 -14   1   4    0.12    0.34
 -12   1   3    0.31    0.31
  -9   1   2   20.96    0.58
  -4   1   2    0.28    0.30
   9   1  14    2.78    0.25
  10   1  17    0.20    0.25
  10   1  29   -0.08    0.31
  10   1  30    0.19    0.33
 -21   0   7    0.28    0.50
   9   0   8    0.20    0.25
  11   0  12    0.12    0.24
  12   0  15   17.71    0.37
  13   0  19    0.24    0.29
  13   0  20    0.07    0.25
  13   0  21    0.01    0.26
  13   0  25    0.26    0.28
  13   0  26   -0.33    0.30
  13   0  27   -0.12    0.37
 -18  -1   1    0.28    0.51
  12  -1   9    0.04    0.31
  15  -1  19    0.37    0.31
  15  -1  20    3.46    0.33
  15  -1  21    6.92    0.36
  15  -1  24    6.71    0.36
  15  -1  25    0.94    0.33
  15  -1  26    0.60    0.36
 -11  -2  -5   -0.04    0.26
  -1  -2  -5    0.88    0.28
  15  -2  12    0.53    0.36
  16  -2  16    2.11    0.36
 -17  -3  -4    6.88    0.34
 -15  -3  -5    9.78    0.35
 -13  -3  -6    0.80    0.24
  -9  -3  -7   16.19    0.34
  -3  -3  -7   27.69    0.39
   3  -3  -5    1.74    0.24
   6  -3  -3    0.50    0.28
  11  -3   2   23.29    0.56
  13  -3   5    3.28    0.51
  18  -3  22    0.26    0.43
 -24  -4   1    0.11    0.42
 -19  -4  -4   -0.09    0.32
 -16  -4  -6    7.07    0.29
 -14  -4  -7    2.96    0.27
 -11  -4  -8    0.09    0.23
 -10  -4  -8   37.10    0.44
  -2  -4  -8    3.57    0.25
   8  -4  -3    2.37    0.26
  13  -4   3    0.01    0.32
 -19  -5  -5    1.36    0.31
 -16  -5  -7   -0.18    0.25
 -14  -5  -8    0.17    0.25
 -11  -5  -9    1.15    0.23
 -10  -5  -9    0.74    0.24
  -2  -5  -9    2.05    0.24
   8  -5  -4    0.19    0.24
  14  -5   3    0.09    0.27
 -20  -6  -5    0.37    0.36
 -19  -6  -6    0.05    0.30
 -17  -6  -7   -0.05    0.32
 -13  -6  -9    0.63    0.26
  -9  -6 -10    0.12    0.25
  -8  -6 -10   26.55    0.35
  -7  -6 -10    0.47    0.25
  -6  -6 -10    8.71    0.28
  -5  -6 -10   -0.05    0.24
  -4  -6 -10   13.89    0.31
  -3  -6 -10    1.19    0.24
   1  -6  -9    0.88    0.23
   3  -6  -8    1.65    0.25
   5  -6  -7   -0.02    0.24
   8  -6  -5   31.11    0.38
   9  -6  -4    1.53    0.25
  10  -6  -3    7.82    0.30
  11  -6  -2    0.90    0.25
  14  -6   2    2.52    0.32
 -18  -7  -7    0.11    0.31
 -16  -7  -8   -0.22    0.29
 -14  -7  -9    0.60    0.28
 -11  -7 -10    8.84    0.30
  -2  -7 -10    0.38    0.25
  -1  -7 -10    0.34    0.24
   2  -7  -9    1.38    0.25
   4  -7  -8    0.58    0.25
   7  -7  -6    3.97    0.25
  15  -7   3    3.53    0.34
  17  -7   7    0.16    0.38
 -17  -8  -8    0.12    0.32
 -15  -8  -9    0.13    0.30
 -12  -8 -10    0.52    0.27
 -11  -8 -10    0.38    0.25
  -1  -8 -10    0.80    0.25
   0  -8 -10   -0.15    0.19
   2  -8  -9    7.33    0.28
   4  -8  -8   14.93    0.30
   6  -8  -7    5.10    0.26
  14  -8   1    1.70    0.31
 -14  -9  -9    0.57    0.33
 -12  -9 -10    0.01    0.31
 -11  -9 -10    8.40    0.32
  -1  -9 -10    2.25    0.27
   2  -9  -9    0.02    0.27
   4  -9  -8    0.47    0.27
   6  -9  -7    0.14    0.26
  14  -9   1   -0.05    0.32
 -10 -10 -10    0.35    0.31
  -9 -10 -10    0.20    0.28
  -3 -10 -10    0.18    0.30
  -2 -10 -10   12.63    0.34
   1 -10  -9   -0.06    0.27
   5 -10  -7    0.06    0.25
   7 -10  -6   -0.04    0.30
   8 -10  -5    1.91    0.30
   9 -10  -4    0.34    0.32
  11 -10  -2    0.24    0.35
  12 -10  -1    0.12    0.36
  13 -10   0   -0.19    0.34
  -1 -11  -9   -0.07    0.33
   0 -11  -9   -0.11    0.31
   2 -11  -8   -0.02    0.31
   4 -11  -7   -0.09    0.30
   6 -11  -6    0.08    0.33
   7 -11  -5    0.03    0.33
 -16   3  20    0.07    0.31
 -16   3  21   -0.03    0.31
 -16   3  22    0.14    0.31
 -16   3  23    0.18    0.33
 -16   3  24   -0.06    0.33
 -15   3  18    3.75    0.29
 -14   3  16    0.12    0.25
 -13   3  15    0.23    0.25
 -12   3  14    0.06    0.24
 -11   3  13    7.47    0.28
 -10   3  12    0.81    0.23
  -9   3  12    3.81    0.26
  -4   3  12   -0.04    0.16
  -3   3  12    9.02    0.28
  -2   3  13    0.69    0.17
  -1   3  13   26.11    0.35
   0   3  14    0.12    0.23
   1   3  15   16.97    0.30
   1   3  16   15.69    0.26
   1   3  31    0.76    0.30
   2   3  17    0.86    0.24
   2   3  18    1.08    0.19
   2   3  29    0.00    0.28
   2   3  30    0.06    0.31
   2   3  31    0.02    0.29
   3   3  19    1.51    0.24
   3   3  20    0.15    0.24
   3   3  21    0.13    0.24
   3   3  22   11.56    0.24
   3   3  25   11.68    0.29
   3   3  26    2.64    0.28
   3   3  27    1.65    0.26
   3   3  28    0.83    0.28
   3   3  29    1.21    0.27
 -20   2  18    2.53    0.37
 -20   2  19    0.12    0.32
 -19   2  15    0.18    0.33
 -18   2  13    4.85    0.36
 -12   2   7    1.11    0.30
  -9   2   6    1.24    0.25
  -3   2   6    0.59    0.23
  -1   2   7    0.63    0.24
   1   2   8    0.19    0.25
   2   2   9  139.63    0.74
   3   2  10    0.34    0.24
   4   2  11    5.27    0.27
   6   2  14    0.90    0.23
   7   2  17    0.72    0.24
   7   2  30   -0.02    0.31
   7   2  31    0.13    0.29
   8   2  21    0.77    0.24
   8   2  22    5.52    0.27
   8   2  23    1.21    0.25
   8   2  24    3.25    0.25
   8   2  25    0.71    0.27
   8   2  26    2.97    0.28
   8   2  27    3.56    0.26
 -22   1  14    0.30    0.37
 -20   1  10    0.13    0.34
   3   1   5   46.05    0.60
   4   1   6    0.41    0.23
   5   1   7   77.08    0.67
   6   1   8    0.62    0.24
   8   1  11    0.20    0.24
   9   1  13   11.88    0.31
  10   1  16    1.01    0.25
  11   1  20    5.20    0.31
  11   1  21   18.72    0.35
  11   1  22    3.17    0.29
  11   1  23    8.52    0.32
  11   1  24    6.99    0.31
  11   1  25    2.64    0.28
  11   1  26    0.42    0.29
  11   1  27    0.75    0.30
  11   1  28    0.59    0.33
 -24   0  12    1.23    0.48
 -23   0  10    0.41    0.46
   6   0   4    5.92    0.41
  12   0  14   29.94    0.47
  13   0  18    0.25    0.29
  13   0  28   -0.07    0.33
  11  -1   7    4.91    0.42
  13  -1  11    3.85    0.35
  14  -1  14    0.54    0.29
  15  -1  18    2.39    0.33
 -17  -2  -2    0.71    0.33
 -10  -2  -5    3.04    0.30
  -2  -2  -5    8.19    0.31
  10  -2   3   15.23    0.71
  16  -2  15    0.74    0.36
  17  -2  22   -0.02    0.38
  17  -2  23    0.10    0.38
  17  -2  24   -0.01    0.36
 -24  -3   3    0.05    0.49
 -18  -3  -3    0.49    0.32
 -12  -3  -6    0.27    0.27
  -8  -3  -7    1.24    0.25
  -7  -3  -7    7.21    0.29
  -6  -3  -7    0.84    0.25
  -5  -3  -7   57.17    0.51
  -4  -3  -7    1.43    0.25
   0  -3  -6    0.05    0.24
  17  -3  14    3.73    0.50
  18  -3  20    0.30    0.41
  18  -3  21    0.02    0.42
 -23  -4   0   -0.07    0.42
 -22  -4  -1    0.41    0.38
 -21  -4  -2    0.34    0.32
 -20  -4  -3    4.59    0.36
 -17  -4  -5   -0.01    0.28
 -13  -4  -7    0.25    0.24
  -9  -4  -8    0.61    0.25
  -4  -4  -8   19.60    0.32
  -3  -4  -8    0.34    0.24
   1  -4  -7    2.56    0.25
   3  -4  -6    1.66    0.25
   5  -4  -5    2.81    0.26
 -20  -5  -4   -0.04    0.33
 -17  -5  -6   -0.05    0.28
 -15  -5  -7    0.55    0.29
 -13  -5  -8    0.67    0.23
  -9  -5  -9   52.49    0.45
  -8  -5  -9    0.28    0.25
  -7  -5  -9    9.73    0.27
  -6  -5  -9    1.33    0.23
  -5  -5  -9    6.09    0.26
  -4  -5  -9    0.73    0.24
  -3  -5  -9    9.73    0.28
   1  -5  -8   21.37    0.29
   3  -5  -7    3.84    0.25
   5  -5  -6    1.76    0.25
   9  -5  -3    4.74    0.26
  10  -5  -2    1.61    0.26
  15  -5   5    9.51    0.43
  16  -5   7    0.17    0.36
 -22  -6  -3    1.44    0.38
 -21  -6  -4    0.12    0.36
 -15  -6  -8    0.15    0.28
 -12  -6  -9    7.46    0.28
  -1  -6  -9    0.84    0.24
   0  -6  -9   46.01    0.41
   2  -6  -8    0.19    0.23
   6  -6  -6    5.94    0.28
  15  -6   4   -0.12    0.33
  17  -6   8    0.06    0.38
 -19  -7  -6    0.77    0.31
 -13  -7  -9    1.62    0.27
 -10  -7 -10    0.10    0.23
  -9  -7 -10    3.87    0.27
  -8  -7 -10    0.37    0.24
  -7  -7 -10   -0.11    0.23
  -6  -7 -10    0.24    0.23
  -5  -7 -10    5.77    0.27
  -4  -7 -10    0.08    0.25
  -3  -7 -10    2.94    0.26
   1  -7  -9    7.74    0.29
   3  -7  -8    0.44    0.24
   5  -7  -7   10.68    0.29
   8  -7  -5   -0.25    0.23
   9  -7  -4    4.35    0.28
  12  -7  -1   -0.11    0.29
  16  -7   5    0.33    0.34
 -18  -8  -7   -0.11    0.33
 -16  -8  -8    0.29    0.31
 -14  -8  -9    0.40    0.29
 -13  -8  -9    0.23    0.30
 -10  -8 -10    1.75    0.28
  -9  -8 -10    0.21    0.27
  -4  -8 -10    3.21    0.25
  -3  -8 -10    1.16    0.25
  -2  -8 -10    6.17    0.27
   1  -8  -9    0.81    0.25
   7  -8  -6    0.08    0.24
   8  -8  -5    5.00    0.31
  13  -8   0    0.25    0.32
  17  -8   7    0.12    0.41
 -13  -9  -9    0.82    0.33
 -10  -9 -10    0.04    0.28
  -9  -9 -10   -0.08    0.28
  -8  -9 -10    0.00    0.28
  -7  -9 -10    1.62    0.25
  -6  -9 -10    0.61    0.26
  -5  -9 -10   12.40    0.30
  -4  -9 -10    0.54    0.28
  -3  -9 -10    0.44    0.26
  -2  -9 -10    0.26    0.24
   1  -9  -9    4.42    0.28
   3  -9  -8    0.12    0.25
   5  -9  -7   11.55    0.31
   7  -9  -6    0.06    0.25
   8  -9  -5    0.24    0.27
   9  -9  -4    2.08    0.29
  12  -9  -1   -0.21    0.33
  13  -9   0    3.61    0.31
  -8 -10 -10    1.82    0.28
  -7 -10 -10    0.21    0.30
  -6 -10 -10    2.58    0.30
  -5 -10 -10   -0.01    0.27
  -4 -10 -10    0.18    0.21
  -1 -10  -9   -0.10    0.26
   0 -10  -9    7.82    0.31
   2 -10  -8    2.08    0.27
   3 -10  -8    0.05    0.25
   6 -10  -6    0.06    0.30
  10 -10  -3    3.78    0.32
  -3 -11  -9    0.32    0.32
  -2 -11  -9   -0.45    0.31
   1 -11  -8    2.14    0.33
   3 -11  -7    0.00    0.31
   5 -11  -6    0.31    0.32
  -8   4  23    0.09    0.25
  -8   4  24    0.44    0.25
  -8   4  25   -0.49    0.26
  -8   4  26   -0.66    0.27
  -7   4  22   -0.10    0.25
  -7   4  23    0.30    0.27
  -7   4  24   -0.03    0.26
  -7   4  25    0.55    0.26
  -7   4  26   -0.24    0.26
  -6   4  22   10.53    0.28
  -6   4  23    0.05    0.25
  -6   4  24    0.22    0.32
  -6   4  25    0.21    0.29
  -6   4  26   -0.96    0.29
  -6   4  27    0.05    0.27
  -5   4  23    0.31    0.24
  -5   4  24   -0.06    0.26
  -5   4  25   -0.09    0.25
  -5   4  26    0.01    0.25
 -17   3  21    3.44    0.38
 -17   3  22    0.58    0.40
 -17   3  23    2.52    0.43
 -16   3  18    0.02    0.32
 -16   3  19    0.06    0.29
 -15   3  16    4.10    0.31
 -15   3  17    3.07    0.29
 -14   3  15    0.25    0.25
 -13   3  14    8.90    0.30
 -12   3  13   -0.05    0.24
 -11   3  12   46.84    0.46
  -9   3  11    9.44    0.29
  -8   3  11    0.16    0.25
  -7   3  11    2.76    0.24
  -6   3  11    0.21    0.17
  -5   3  11   30.66    0.38
  -4   3  11    0.09    0.23
  -2   3  12   -0.02    0.23
   0   3  13    0.22    0.22
   1   3  14   14.17    0.30
   2   3  16    0.70    0.25
   3   3  17   38.22    0.39
   3   3  18    2.02    0.25
   3   3  30    3.49    0.32
   3   3  31    0.24    0.32
   4   3  20    0.69    0.25
   4   3  21    1.37    0.26
   4   3  22   -0.07    0.25
   4   3  23    0.16    0.23
   4   3  24    0.09    0.24
   4   3  25    0.26    0.24
   4   3  26    0.29    0.26
   4   3  27   -0.09    0.27
   4   3  28   -0.11    0.28
   4   3  29   -0.44    0.27
 -20   2  17    1.26    0.35
 -19   2  14    0.37    0.31
 -17   2  11    0.34    0.31
 -16   2  10    3.32    0.31
 -15   2   9    0.19    0.28
 -14   2   8   40.64    0.55
 -10   2   6   21.87    0.40
   0   2   7    5.26    0.27
   5   2  12    0.13    0.23
   7   2  16    0.19    0.23
   8   2  18   31.91    0.40
   8   2  19    2.44    0.25
   8   2  20    2.85    0.23
   8   2  28    1.84    0.30
   8   2  29    0.08    0.31
   8   2  30   -0.34    0.31
 -22   1  13    0.10    0.41
 -18   1   7    0.41    0.35
 -17   1   6   19.34    0.54
  -3   1   2  140.47    1.24
   7   1   9   55.30    0.54
  10   1  15    0.66    0.24
  11   1  18    3.62    0.30
  11   1  19    4.24    0.27
  11   1  29    0.37    0.32
 -22   0   8    3.63    0.66
   5   0   3    0.12    0.38
   7   0   5    0.37    0.27
  10   0   9   11.56    0.37
  11   0  11    0.04    0.28
  13   0  17    0.25    0.24
 -15  -1  -1   16.07    0.58
 -13  -1  -2   23.92    0.59
 -10  -1  -3    1.02    0.31
  -2  -1  -3    0.23    0.28
  15  -1  17   12.44    0.41
 -23  -2   4    0.13    0.56
 -15  -2  -3    1.00    0.33
 -13  -2  -4    0.38    0.27
   1  -2  -4    1.25    0.21
   3  -2  -3    3.97    0.31
  17  -2  20    0.26    0.37
  17  -2  21    0.09    0.36
   2  -3  -5    0.31    0.24
   4  -3  -4    0.49    0.23
  10  -3   1    0.59    0.29
  18  -3  19    0.12    0.40
 -15  -4  -6    0.13    0.24
 -12  -4  -7    2.60    0.28
  -8  -4  -8   18.83    0.33
  -7  -4  -8    1.34    0.24
  -6  -4  -8   27.81    0.37
  -5  -4  -8    0.69    0.24
   0  -4  -7   70.51    0.52
   6  -4  -4   90.88    0.63
  16  -4   9    2.81    0.63
 -23  -5  -1   -0.23    0.41
 -22  -5  -2   -0.01    0.34
 -21  -5  -3    0.12    0.35
 -12  -5  -8   -0.05    0.22
   0  -5  -8    0.13    0.23
   6  -5  -5    0.90    0.25
  13  -5   2   21.92    0.45
 -18  -6  -6    0.61    0.31
 -16  -6  -7   -0.04    0.28
 -14  -6  -8    3.63    0.28
 -11  -6  -9   -0.05    0.24
 -10  -6  -9    5.58    0.27
  -2  -6  -9   20.01    0.32
   4  -6  -7    4.16    0.26
   7  -6  -5    0.95    0.23
  16  -6   6    0.20    0.34
  18  -6  11    2.96    0.57
 -20  -7  -5   -0.30    0.33
 -17  -7  -7    0.21    0.30
 -15  -7  -8    1.12    0.27
 -12  -7  -9   -0.09    0.24
  -1  -7  -9    9.05    0.27
   0  -7  -9   -0.11    0.25
   6  -7  -6    1.38    0.24
  10  -7  -3    0.33    0.25
  11  -7  -2   12.15    0.32
  18  -7  10    0.14    0.45
 -17  -8  -7    0.13    0.32
 -15  -8  -8   -0.24    0.28
 -12  -8  -9   -0.09    0.27
  -8  -8 -10    1.21    0.25
  -7  -8 -10    0.11    0.26
  -6  -8 -10    1.34    0.27
  -5  -8 -10    0.01    0.24
   0  -8  -9    4.77    0.27
   3  -8  -8    0.52    0.23
   5  -8  -7    0.19    0.23
   6  -8  -6    1.45    0.27
   9  -8  -4   -0.03    0.25
  10  -8  -3    3.65    0.29
  11  -8  -2   -0.18    0.27
  12  -8  -1    0.21    0.27
  16  -8   5    0.01    0.33
 -15  -9  -8    1.22    0.32
 -12  -9  -9    0.11    0.30
 -11  -9  -9    0.57    0.27
  -1  -9  -9    4.13    0.29
   0  -9  -9    1.35    0.25
   2  -9  -8    0.25    0.26
   4  -9  -7    0.79    0.30
   6  -9  -6    0.01    0.26
  10  -9  -3    0.16    0.26
  11  -9  -2    1.01    0.28
  14  -9   2    0.11    0.35
 -11 -10  -9    0.56    0.28
 -10 -10  -9    0.69    0.34
  -9 -10  -9   -0.16    0.28
  -3 -10  -9    0.28    0.28
  -2 -10  -9    0.58    0.29
   1 -10  -8   -0.05    0.28
   4 -10  -7    0.42    0.25
   5 -10  -6    0.21    0.29
   7 -10  -5   -0.26    0.29
   8 -10  -4    0.26    0.28
  12 -10   0   -0.13    0.36
  13 -10   1   -0.10    0.33
  -1 -11  -8    2.74    0.32
   0 -11  -8    0.49    0.28
   2 -11  -7    0.40    0.32
   4 -11  -6   -0.04    0.30
   6 -11  -5    0.46    0.32
   7 -11  -4    1.98    0.29
 -11   4  24   -0.15    0.30
 -11   4  25    0.30    0.31
 -11   4  26    0.16    0.32
 -10   4  21    1.06    0.27
 -10   4  22    1.96    0.28
 -10   4  23    1.28    0.29
 -10   4  24    1.18    0.31
 -10   4  25    0.00    0.30
 -10   4  26    0.31    0.29
 -10   4  27    2.19    0.30
 -10   4  28    1.60    0.29
  -9   4  20   -0.11    0.23
  -9   4  21   -0.13    0.25
  -9   4  22    0.35    0.25
  -9   4  23   -0.17    0.27
  -9   4  24   -0.26    0.24
  -9   4  25    0.01    0.25
  -9   4  26   -0.10    0.28
  -9   4  27    0.16    0.29
  -9   4  28   -0.07    0.30
  -8   4  19   23.69    0.37
  -8   4  20    0.36    0.25
  -8   4  21    0.06    0.25
  -8   4  22    0.14    0.25
  -8   4  27   -0.02    0.26
  -8   4  28   -0.47    0.31
  -8   4  29    0.81    0.33
  -7   4  19    0.67    0.25
  -7   4  20   -0.27    0.25
  -7   4  21    0.41    0.23
  -7   4  27    0.29    0.26
  -7   4  28    0.21    0.30
  -7   4  29   -0.21    0.31
  -6   4  19   12.85    0.30
  -6   4  20    2.57    0.25
  -6   4  21   13.92    0.29
  -6   4  28   -0.12    0.27
  -6   4  29    0.13    0.32
  -6   4  30    0.77    0.33
  -5   4  19    0.29    0.23
  -5   4  20   -0.13    0.25
  -5   4  21   -0.05    0.25
  -5   4  22    0.17    0.18
  -5   4  27    0.54    0.26
  -5   4  28   -0.19    0.30
  -5   4  29    0.13    0.30
  -5   4  30    0.06    0.32
  -4   4  20    1.44    0.25
  -4   4  21    5.10    0.27
  -4   4  22    0.32    0.25
  -4   4  23    0.36    0.24
  -4   4  24   -0.21    0.23
  -4   4  25   -0.07    0.24
  -4   4  26   -0.12    0.25
  -4   4  27   -0.94    0.30
  -4   4  28   -0.13    0.29
  -4   4  29    0.52    0.30
  -4   4  30    0.59    0.28
  -3   4  21   -0.11    0.25
  -3   4  22    0.22    0.24
  -3   4  23   -0.07    0.26
  -3   4  24    0.16    0.25
  -3   4  25   -0.07    0.27
  -3   4  26    0.07    0.27
  -3   4  27   -0.08    0.28
  -3   4  28    0.16    0.28
  -3   4  29    0.06    0.27
  -2   4  22    1.56    0.23
  -2   4  23    3.06    0.27
  -2   4  24    3.58    0.28
  -2   4  25    0.80    0.27
  -2   4  26    8.33    0.31
  -2   4  27    6.17    0.27
 -17   3  19    5.28    0.36
 -17   3  20    2.49    0.31
 -16   3  17    0.04    0.26
 -15   3  15    2.42    0.30
 -14   3  14    0.10    0.25
 -13   3  13    6.50    0.28
 -12   3  12    0.36    0.26
 -10   3  11    0.23    0.23
  -7   3  10    4.91    0.27
  -6   3  10    0.27    0.24
  -5   3  10   18.92    0.34
  -3   3  11   18.78    0.29
  -2   3  11    0.66    0.24
  -1   3  12   14.38    0.30
   2   3  15    0.42    0.23
   3   3  16   10.03    0.29
   4   3  18    0.30    0.23
   4   3  19    0.06    0.23
   4   3  30    0.45    0.30
   4   3  31   -0.19    0.32
   5   3  21   18.37    0.32
   5   3  22   -0.16    0.24
   5   3  23    2.99    0.26
   5   3  24   -0.21    0.26
   5   3  25    0.71    0.28
   5   3  26   11.72    0.32
   5   3  27    0.18    0.29
   5   3  28    0.21    0.29
 -21   2  18   -0.12    0.37
 -20   2  16    2.64    0.35
 -18   2  12    0.93    0.32
 -13   2   7   -0.23    0.30
 -11   2   6   -0.02    0.27
  -2   2   6  149.47    0.84
   2   2   8   87.36    0.62
   3   2   9    0.35    0.25
   4   2  10   13.50    0.33
   6   2  13    9.52    0.29
   7   2  15    0.13    0.24
   8   2  17    4.67    0.26
   9   2  21    0.44    0.25
   9   2  22    0.09    0.25
   9   2  23    0.28    0.25
   9   2  24   -0.10    0.25
   9   2  25    0.18    0.27
   9   2  26   -0.07    0.28
   9   2  27    0.28    0.29
   9   2  28    0.13    0.27
 -23   1  15    0.59    0.44
 -21   1  11    1.39    0.38
 -19   1   8    0.25    0.35
 -16   1   5    0.84    0.37
 -10   1   2    0.44    0.35
   0   1   3    0.13    0.19
   2   1   4    0.25    0.31
   8   1  10   -0.05    0.28
   9   1  12    7.83    0.29
  10   1  14    0.50    0.23
  11   1  17    6.68    0.29
  12   1  22    0.02    0.31
  12   1  23    0.17    0.31
  12   1  24   -0.14    0.27
  12   1  25   -0.15    0.28
  12   1  26   -0.05    0.34
  12   1  27    0.03    0.32
  -8   0  -1    0.02    0.45
   8   0   6    0.46    0.28
  12   0  13    0.10    0.25
  13   0  16    1.20    0.24
  14   0  20    1.48    0.30
  14   0  21    0.11    0.30
  14   0  22    0.21    0.28
  14   0  23    1.49    0.29
  14   0  24    4.87    0.32
  14   0  25    0.17    0.30
  14   0  26    8.96    0.36
  14   0  27    2.01    0.34
 -20  -1   3    0.07    0.61
 -19  -1   2    2.25    0.59
  14  -1  13    0.05    0.27
  15  -1  16    1.60    0.34
  16  -1  23    0.08    0.34
  16  -1  24    0.03    0.35
  16  -1  25   -0.09    0.36
 -18  -2  -1    2.51    0.36
  -9  -2  -5    0.53    0.24
  -8  -2  -5    1.74    0.30
  -4  -2  -5   22.61    0.40
  -3  -2  -5    0.48    0.17
   7  -2   0    0.20    0.31
  14  -2   9   37.75    0.97
  17  -2  19    0.06    0.36
 -23  -3   2    3.09    0.44
 -20  -3  -1    0.14    0.34
 -19  -3  -2    5.25    0.36
 -16  -3  -4   -0.07    0.27
 -14  -3  -5    0.72    0.25
 -11  -3  -6    1.22    0.24
  -1  -3  -6   60.44    0.52
   9  -3   0    0.66    0.26
  14  -3   7    0.03    0.57
  18  -3  18    0.12    0.40
 -18  -4  -4    4.17    0.32
 -14  -4  -6    0.51    0.30
 -11  -4  -7    0.22    0.26
  -1  -4  -7    2.38    0.26
   2  -4  -6   50.74    0.46
   4  -4  -5   48.00    0.47
   7  -4  -3    0.80    0.28
  12  -4   2    1.08    0.29
  14  -4   5   13.59    0.51
  19  -4  19    0.01    0.50
 -18  -5  -5    0.10    0.26
 -16  -5  -6    0.04    0.28
 -14  -5  -7    0.04    0.25
 -11  -5  -8    2.35    0.23
  -2  -5  -8    1.93    0.23
  -1  -5  -8   22.44    0.33
   2  -5  -7    1.79    0.25
   4  -5  -6    0.00    0.24
   7  -5  -4    8.23    0.28
 -20  -6  -4    2.47    0.37
 -19  -6  -5   -0.10    0.30
 -17  -6  -6    0.37    0.32
 -15  -6  -7   -0.04    0.31
 -13  -6  -8    0.32    0.26
  -9  -6  -9    0.67    0.25
  -8  -6  -9    4.64    0.27
  -7  -6  -9    1.17    0.26
  -6  -6  -9    6.44    0.27
  -5  -6  -9    0.16    0.24
  -4  -6  -9   12.21    0.30
  -3  -6  -9    0.70    0.23
   1  -6  -8    1.40    0.24
   3  -6  -7    1.27    0.24
   5  -6  -6    0.18    0.24
   8  -6  -4   13.98    0.31
   9  -6  -3    0.27    0.24
  10  -6  -2    5.72    0.31
  11  -6  -1    0.46    0.31
 -18  -7  -6   -0.44    0.31
 -16  -7  -7    0.13    0.27
 -14  -7  -8    0.15    0.27
 -11  -7  -9    1.62    0.23
 -10  -7  -9    0.07    0.24
  -2  -7  -9    1.40    0.25
   2  -7  -8    0.86    0.18
   4  -7  -7    0.22    0.25
   7  -7  -5   13.46    0.29
  15  -7   4    7.78    0.40
 -18  -8  -6    0.55    0.34
 -16  -8  -7    4.40    0.33
 -14  -8  -8    0.68    0.29
 -11  -8  -9   -0.04    0.27
 -10  -8  -9    0.41    0.26
  -2  -8  -9    7.11    0.27
  -1  -8  -9    0.52    0.23
   2  -8  -8    1.36    0.25
   4  -8  -7    4.89    0.27
   7  -8  -5    0.98    0.25
  13  -8   1    0.30    0.31
 -14  -9  -8   -0.06    0.29
 -13  -9  -8    5.70    0.31
 -10  -9  -9    0.34    0.29
  -9  -9  -9    0.51    0.28
  -4  -9  -9    0.75    0.25
  -3  -9  -9   13.23    0.31
  -2  -9  -9    0.24    0.26
   1  -9  -8    1.90    0.25
   5  -9  -6    4.03    0.29
   7  -9  -5    2.20    0.28
   8  -9  -4    0.31    0.24
  12  -9   0   -0.07    0.33
  13  -9   1    1.58    0.31
  -8 -10  -9    0.36    0.27
  -7 -10  -9    0.31    0.30
  -6 -10  -9    0.39    0.29
  -5 -10  -9    0.03    0.28
  -4 -10  -9    0.93    0.27
   0 -10  -8    0.32    0.28
   3 -10  -7    0.15    0.26
   6 -10  -5    0.49    0.29
   9 -10  -3    0.24    0.29
  10 -10  -2    0.51    0.31
  11 -10  -1   -0.16    0.32
  -5 -11  -8    0.31    0.28
  -4 -11  -8    0.34    0.31
  -3 -11  -8    1.06    0.32
  -2 -11  -8    0.51    0.27
   1 -11  -7    0.93    0.32
   3 -11  -6    5.43    0.32
   5 -11  -5    1.12    0.32
 -12   4  22    0.27    0.29
 -12   4  23    5.79    0.31
 -12   4  24    2.09    0.30
 -12   4  25    0.51    0.32
 -12   4  26    1.24    0.33
 -12   4  27    3.72    0.35
 -11   4  20    0.60    0.25
 -11   4  21   -0.04    0.27
 -11   4  22    0.41    0.27
 -11   4  23    0.37    0.26
 -11   4  27   -0.07    0.28
 -10   4  19    2.60    0.26
 -10   4  20    4.59    0.27
  -9   4  18    0.00    0.24
  -9   4  19    0.40    0.25
  -8   4  18    1.80    0.26
  -7   4  18    0.41    0.25
  -6   4  17   12.25    0.29
  -6   4  18    4.46    0.26
  -5   4  18    0.49    0.25
  -4   4  18    5.49    0.28
  -4   4  19   20.79    0.32
  -3   4  19    0.14    0.24
  -3   4  20    0.40    0.23
  -3   4  30    0.44    0.31
  -2   4  19    7.02    0.26
  -2   4  20    8.71    0.28
  -2   4  21    0.69    0.25
  -2   4  28    0.07    0.27
  -2   4  29    0.81    0.28
  -2   4  30    0.69    0.31
  -2   4  31    0.04    0.29
  -1   4  21    0.19    0.24
  -1   4  22    0.01    0.23
  -1   4  23    0.74    0.26
  -1   4  24    0.41    0.25
  -1   4  25   -0.21    0.26
  -1   4  26   -0.01    0.27
  -1   4  27    0.13    0.28
  -1   4  28   -0.09    0.29
  -1   4  29    0.32    0.28
   0   4  24   10.09    0.28
   0   4  25    0.39    0.24
   0   4  26   -0.05    0.24
   0   4  27    0.21    0.25
 -18   3  20   -0.08    0.32
 -18   3  21    0.16    0.33
 -18   3  22    0.19    0.33
 -17   3  18    3.77    0.32
 -16   3  16   -0.03    0.25
 -15   3  14   11.62    0.36
 -14   3  13    0.44    0.28
 -13   3  12   25.45    0.42
 -11   3  11    7.81    0.29
  -9   3  10    1.12    0.24
  -8   3  10    0.08    0.24
  -4   3  10    0.49    0.24
  -3   3  10   39.50    0.42
  -1   3  11   56.83    0.46
   0   3  12   -0.04    0.23
   1   3  13   24.61    0.31
   2   3  14    0.24    0.22
   3   3  15    1.75    0.24
   4   3  17    0.51    0.24
   5   3  19   11.78    0.30
   5   3  20    8.72    0.27
   5   3  29    0.22    0.26
   5   3  30    1.54    0.30
   5   3  31    0.91    0.32
   6   3  23    0.22    0.25
   6   3  24   -0.14    0.26
   6   3  25    0.28    0.27
   6   3  26   -0.03    0.27
   6   3  27    0.22    0.23
   6   3  28   -0.54    0.30
 -21   2  17    0.18    0.35
 -20   2  15    3.93    0.41
 -19   2  13    0.03    0.31
 -17   2  10    0.02    0.28
 -16   2   9   15.70    0.40
  -8   2   5    1.27    0.29
  -7   2   5    0.86    0.23
  -6   2   5   10.79    0.32
  -5   2   5    0.44    0.22
  -1   2   6    0.30    0.25
   1   2   7    0.68    0.24
   5   2  11   -0.02    0.23
   6   2  12    8.64    0.29
   7   2  14    0.18    0.25
   8   2  16    3.69    0.25
   9   2  19    0.25    0.23
   9   2  20    0.45    0.24
   9   2  29   -0.18    0.32
   9   2  30    0.18    0.32
 -20   1   9   -0.02    0.33
 -13   1   3   20.27    0.62
  11   1  16    1.78    0.26
  12   1  20    0.10    0.29
  12   1  21    0.15    0.27
  12   1  28    0.18    0.32
  12   1  29    0.43    0.33
  -4   0  -1    1.37    0.53
  13   0  15    0.41    0.29
  14   0  19    4.20    0.33
  -9  -1  -3   31.93    0.57
  -3  -1  -3   86.06    0.89
  16  -1  21    0.03    0.34
  16  -1  22   -0.21    0.33
 -19  -2   0   -0.02    0.37
 -12  -2  -4    1.21    0.28
  -7  -2  -5    0.83    0.24
  -6  -2  -5   10.77    0.31
  -5  -2  -5    0.46    0.22
   0  -2  -4    6.61    0.33
   8  -2   1   67.81    0.94
   9  -2   2    0.43    0.37
  16  -2  14   11.24    0.47
  17  -2  18    0.29    0.37
 -22  -3   1    0.22    0.37
 -21  -3   0    4.90    0.41
 -10  -3  -6    0.44    0.24
  -2  -3  -6    0.14    0.24
   1  -3  -5   19.80    0.36
   5  -3  -3    5.26    0.26
 -24  -4   2    4.65    0.50
 -19  -4  -3   -0.04    0.31
 -16  -4  -5    1.60    0.25
 -10  -4  -7   46.45    0.45
  -2  -4  -7    6.64    0.27
   8  -4  -2   80.73    0.65
  11  -4   1    1.09    0.28
  15  -4   7    0.09    0.44
  19  -4  18    0.01    0.60
 -20  -5  -3    0.04    0.30
 -19  -5  -4    0.65    0.28
 -13  -5  -7    7.48    0.28
 -10  -5  -8    0.11    0.23
  -9  -5  -8    4.90    0.27
  -3  -5  -8   36.01    0.38
   1  -5  -7   20.29    0.33
   5  -5  -5    0.31    0.24
   8  -5  -3    0.08    0.23
   9  -5  -2   16.88    0.37
  12  -5   1    0.73    0.29
 -22  -6  -2    2.49    0.41
 -21  -6  -3    0.08    0.36
 -18  -6  -5    0.49    0.34
 -12  -6  -8   -0.26    0.25
  -1  -6  -8    1.84    0.23
   0  -6  -8    0.01    0.24
   6  -6  -5    0.15    0.25
  14  -6   3    2.42    0.32
 -20  -7  -4    0.31    0.37
 -19  -7  -5    0.04    0.30
 -17  -7  -6    0.31    0.34
 -15  -7  -7   -0.20    0.31
 -13  -7  -8   11.29    0.31
  -9  -7  -9   14.56    0.30
  -8  -7  -9    0.35    0.25
  -7  -7  -9   10.02    0.29
  -6  -7  -9    0.56    0.24
  -5  -7  -9   14.71    0.31
  -4  -7  -9    0.27    0.24
  -3  -7  -9    0.78    0.17
   0  -7  -8   -0.05    0.23
   1  -7  -8   24.59    0.30
   3  -7  -7    5.78    0.27
   5  -7  -6    7.57    0.27
   8  -7  -4    0.11    0.23
   9  -7  -3    9.78    0.29
  10  -7  -2    0.30    0.28
  11  -7  -1    1.88    0.30
  12  -7   0    0.23    0.28
  16  -7   6    0.07    0.38
  17  -7   8    1.65    0.42
 -17  -8  -6    0.10    0.33
 -15  -8  -7   -0.20    0.30
 -13  -8  -8    0.73    0.29
  -9  -8  -9    0.49    0.26
  -8  -8  -9    0.42    0.28
  -7  -8  -9   -0.17    0.26
  -6  -8  -9    0.81    0.26
  -5  -8  -9    0.06    0.26
  -4  -8  -9    2.83    0.26
  -3  -8  -9    0.33    0.23
   0  -8  -8    0.16    0.23
   1  -8  -8    0.24    0.23
   3  -8  -7    0.37    0.24
   5  -8  -6    0.20    0.24
   8  -8  -4    4.24    0.28
   9  -8  -3    0.10    0.29
  11  -8  -1    0.02    0.30
  12  -8   0    0.24    0.31
  16  -8   6    0.38    0.33
  17  -8   8    0.09    0.42
 -15  -9  -7    1.78    0.32
 -12  -9  -8    0.41    0.30
  -8  -9  -9   -0.11    0.24
  -7  -9  -9    1.17    0.25
  -6  -9  -9    0.57    0.27
  -5  -9  -9    0.84    0.25
   0  -9  -8    0.74    0.27
   3  -9  -7    2.72    0.26
   6  -9  -5    0.67    0.23
   9  -9  -3    0.86    0.28
  10  -9  -2    0.15    0.28
  11  -9  -1    1.50    0.30
  14  -9   3    0.51    0.37
 -11 -10  -8    0.28    0.30
 -10 -10  -8    0.21    0.32
  -9 -10  -8    0.10    0.27
  -3 -10  -8    0.14    0.25
  -2 -10  -8   -0.06    0.29
  -1 -10  -8    0.63    0.25
   1 -10  -7    0.33    0.26
   2 -10  -7    1.87    0.27
   4 -10  -6    6.01    0.30
   7 -10  -4    0.16    0.29
   8 -10  -3    0.26    0.26
  12 -10   1    0.16    0.33
  13 -10   2   -0.14    0.33
  -1 -11  -7   -0.04    0.31
   2 -11  -6   -0.06    0.32
   4 -11  -5   -0.12    0.30
   6 -11  -4    0.19    0.33
   7 -11  -3   -0.30    0.32
 -14   4  25    0.34    0.34
 -13   4  21   -0.28    0.31
 -13   4  22   -0.03    0.29
 -13   4  23    0.02    0.29
 -13   4  24    0.25    0.30
 -13   4  25    0.16    0.31
 -13   4  26    0.10    0.31
 -12   4  19    0.22    0.28
 -12   4  20    2.62    0.28
 -12   4  21    3.58    0.29
 -11   4  18    0.20    0.23
 -11   4  19    0.15    0.25
 -10   4  17    0.11    0.26
 -10   4  18    0.99    0.25
  -9   4  17    0.76    0.24
  -8   4  16   14.50    0.29
  -8   4  17    0.01    0.24
  -7   4  16    0.65    0.25
  -7   4  17    0.51    0.22
  -6   4  16   51.45    0.43
  -5   4  16    0.70    0.24
  -5   4  17   -0.27    0.23
  -4   4  17    4.88    0.26
  -3   4  17   -0.12    0.24
  -3   4  18    0.52    0.18
  -2   4  18    7.63    0.28
  -1   4  19    0.45    0.24
  -1   4  20    0.38    0.22
  -1   4  30   -0.07    0.28
   0   4  20    0.12    0.24
   0   4  21    3.71    0.26
   0   4  22    2.12    0.25
   0   4  23    2.29    0.20
   0   4  28    0.27    0.26
   0   4  29    0.59    0.31
   0   4  30   -0.43    0.30
   0   4  31   -0.58    0.32
   1   4  22   -0.16    0.23
   1   4  23    0.25    0.26
   1   4  24    0.50    0.27
   1   4  25   -0.02    0.26
   1   4  26   -0.30    0.27
   1   4  27   -0.03    0.28
   1   4  28    0.24    0.28
 -18   3  19   -0.07    0.30
 -17   3  16    6.99    0.36
 -17   3  17    4.49    0.32
 -16   3  15    0.37    0.24
 -12   3  11    0.18    0.25
 -10   3  10    0.10    0.23
  -7   3   9   31.76    0.42
  -6   3   9    0.12    0.24
  -2   3  10    0.45    0.23
   0   3  11    0.21    0.23
   1   3  12   14.96    0.31
   2   3  13    0.96    0.24
   3   3  14    2.55    0.24
   4   3  16    0.10    0.23
   5   3  17   30.92    0.37
   5   3  18    5.27    0.27
   6   3  20    0.12    0.25
   6   3  21    0.05    0.24
   6   3  22   -0.07    0.23
   6   3  29   -0.18    0.29
   6   3  30   -0.02    0.31
   6   3  31    0.15    0.29
 -21   2  16   -0.02    0.34
 -20   2  14    3.51    0.38
 -18   2  11    2.05    0.33
 -15   2   8   -0.13    0.27
 -12   2   6    5.64    0.32
  -9   2   5    0.72    0.27
  -4   2   5   23.28    0.41
   7   2  13    0.24    0.24
   8   2  15   12.62    0.30
   9   2  18    0.69    0.23
  10   2  22    1.18    0.26
  10   2  23    3.06    0.28
  10   2  24    0.11    0.27
  10   2  25    0.61    0.34
  10   2  26   -0.04    0.31
  10   2  27   -0.13    0.30
  10   2  28    0.46    0.31
  10   2  29   -0.14    0.27
 -23   1  14    0.27    0.44
 -22   1  12    0.04    0.38
 -15   1   4   19.75    0.62
  -2   1   2    0.09    0.27
   5   1   6  118.31    0.84
   6   1   7    1.16    0.24
   7   1   8    6.23    0.32
   9   1  11    4.05    0.27
  10   1  13    0.02    0.23
  11   1  15    9.80    0.37
  12   1  18    0.29    0.29
  12   1  19   -0.09    0.25
 -24   0  11    2.02    0.53
   9   0   7    0.77    0.27
  11   0  10    0.52    0.27
  12   0  12    1.81    0.32
  14   0  18   16.34    0.38
   9  -1   4   23.99    1.21
  13  -1  10    2.45    0.35
  15  -1  15   10.77    0.42
  16  -1  19   -0.01    0.34
  16  -1  20   -0.05    0.32
 -22  -2   3    1.29    0.50
 -16  -2  -2   12.22    0.42
   4  -2  -2   80.09    0.76
  15  -2  11    0.18    0.40
 -25  -3   5    0.64    0.57
 -17  -3  -3    5.51    0.34
 -15  -3  -4    4.06    0.32
 -13  -3  -5    3.35    0.27
  -9  -3  -6   26.41    0.39
  -8  -3  -6    1.53    0.29
  -4  -3  -6    1.38    0.24
  -3  -3  -6    4.86    0.27
   3  -3  -4   51.01    0.50
  18  -3  17    0.07    0.45
 -23  -4   1   -0.14    0.42
 -21  -4  -1   -0.11    0.36
 -20  -4  -2    4.58    0.36
 -17  -4  -4    0.01    0.27
 -13  -4  -6    0.29    0.24
  -9  -4  -7    0.28    0.25
  -8  -4  -7   13.18    0.34
  -4  -4  -7   26.17    0.36
  -3  -4  -7    0.41    0.24
   1  -4  -6    2.39    0.25
   3  -4  -5    0.96    0.25
   5  -4  -4    1.84    0.26
 -23  -5   0   -0.05    0.40
 -22  -5  -1    0.17    0.34
 -21  -5  -2    2.52    0.37
 -17  -5  -5    0.32    0.25
 -15  -5  -6    6.90    0.29
 -12  -5  -7    0.29    0.22
  -8  -5  -8    0.09    0.23
  -7  -5  -8   10.60    0.29
  -6  -5  -8    0.88    0.24
  -5  -5  -8   10.29    0.29
  -4  -5  -8    0.56    0.17
   0  -5  -7    0.44    0.24
   3  -5  -6   11.91    0.30
  14  -5   4    0.18    0.27
  17  -5  10    6.32    0.59
 -16  -6  -6    0.26    0.27
 -14  -6  -7    8.11    0.30
 -11  -6  -8    0.16    0.24
 -10  -6  -8   16.24    0.31
  -2  -6  -8    0.33    0.24
   2  -6  -7   28.73    0.32
   4  -6  -6    4.85    0.26
   7  -6  -4    0.86    0.24
  15  -6   5    0.07    0.35
  17  -6   9   -0.05    0.40
 -18  -7  -5   -0.23    0.32
 -14  -7  -7    0.52    0.28
 -12  -7  -8    0.37    0.23
 -11  -7  -8    2.61    0.26
  -1  -7  -8   25.11    0.35
   2  -7  -7    1.17    0.24
   4  -7  -6    0.31    0.23
   6  -7  -5    0.45    0.23
  18  -7  11    0.22    0.47
 -18  -8  -5    0.66    0.35
 -14  -8  -7    2.03    0.31
 -12  -8  -8    0.23    0.27
 -11  -8  -8    0.43    0.26
  -1  -8  -8    0.29    0.24
   2  -8  -7    0.36    0.25
   4  -8  -6    1.32    0.23
   6  -8  -5   11.32    0.30
  10  -8  -2    6.20    0.30
 -14  -9  -7    0.11    0.32
 -11  -9  -8    5.10    0.30
 -10  -9  -8    0.06    0.28
  -3  -9  -8    0.01    0.23
  -2  -9  -8   -0.09    0.27
  -1  -9  -8    0.60    0.25
   1  -9  -7   -0.02    0.23
   2  -9  -7    0.20    0.23
   4  -9  -6    0.26    0.26
   7  -9  -4    1.94    0.27
  13  -9   2    0.81    0.34
 -12 -10  -7    2.21    0.34
  -8 -10  -8   -0.05    0.30
  -7 -10  -8   -0.57    0.31
  -6 -10  -8    0.93    0.30
  -5 -10  -8    0.41    0.27
  -4 -10  -8   -0.01    0.27
   0 -10  -7    9.78    0.33
   3 -10  -6    0.26    0.28
   5 -10  -5    0.10    0.25
   6 -10  -4    0.31    0.26
   9 -10  -2    0.31    0.28
  10 -10  -1    0.38    0.31
  11 -10   0    0.22    0.32
  -5 -11  -7    0.27    0.31
  -4 -11  -7    0.40    0.31
  -3 -11  -7    0.66    0.31
   1 -11  -6    2.02    0.33
   3 -11  -5    1.47    0.30
   5 -11  -4    2.46    0.32
   8 -11  -2    0.11    0.32
 -15   4  24   -0.07    0.33
 -14   4  21   -0.01    0.29
 -14   4  22    0.23    0.28
 -14   4  23    6.16    0.33
 -14   4  24    1.63    0.28
 -13   4  19    0.03    0.28
 -13   4  20    0.26    0.27
 -12   4  18    1.79    0.26
 -11   4  17    0.25    0.25
 -10   4  16   23.86    0.34
  -9   4  16    0.09    0.23
  -8   4  15   11.80    0.28
  -7   4  15    0.56    0.24
  -6   4  15   28.61    0.36
  -5   4  15    1.72    0.25
  -4   4  16   16.20    0.31
  -3   4  16    0.55    0.24
  -2   4  17    0.12    0.24
  -1   4  17   -0.19    0.24
  -1   4  18    0.06    0.22
   0   4  18    0.38    0.22
   0   4  19    5.17    0.26
   1   4  20    0.34    0.24
   1   4  21    0.36    0.25
   1   4  29   -0.12    0.21
   1   4  30   -0.17    0.30
   2   4  22    1.37    0.23
   2   4  23    3.33    0.27
   2   4  24    5.29    0.28
   2   4  25    1.36    0.27
   2   4  26   10.24    0.31
   2   4  27    7.00    0.31
   2   4  28    0.20    0.29
   2   4  29    0.20    0.31
   2   4  30    0.77    0.29
 -19   3  20    2.02    0.38
 -19   3  21    1.11    0.35
 -18   3  17    0.12    0.33
 -18   3  18    0.41    0.30
 -16   3  14    0.19    0.28
 -15   3  13    1.36    0.26
 -14   3  12    0.32    0.24
 -13   3  11    4.37    0.28
 -11   3  10   17.76    0.34
  -9   3   9    3.41    0.26
  -8   3   9   -0.02    0.25
  -5   3   9    3.68    0.26
  -4   3   9    0.59    0.24
  -1   3  10   29.10    0.37
   2   3  12    0.11    0.23
   3   3  13    9.07    0.27
   4   3  15   -0.10    0.23
   5   3  16   41.57    0.40
   6   3  18    0.37    0.24
   6   3  19    0.23    0.24
   7   3  21    3.68    0.24
   7   3  22    9.51    0.29
   7   3  23    0.80    0.25
   7   3  24    1.74    0.25
   7   3  25    0.84    0.27
   7   3  26    6.22    0.27
   7   3  27    0.43    0.28
   7   3  28    2.22    0.28
   7   3  29    3.94    0.32
   7   3  30    1.71    0.29
 -19   2  12    0.17    0.30
 -14   2   7   67.93    0.68
 -10   2   5    2.62    0.29
  -3   2   5    0.54    0.25
   0   2   6   62.10    0.57
   3   2   8    0.53    0.25
   4   2   9   79.28    0.58
   5   2  10    1.03    0.24
   6   2  11    6.55    0.28
   8   2  14   15.87    0.34
   9   2  17    0.50    0.23
  10   2  20    0.66    0.26
  10   2  21    1.02    0.25
 -21   1  10    0.46    0.37
   4   1   5    0.40    0.25
   8   1   9    0.19    0.28
  12   1  17    0.52    0.30
  13   1  22   11.36    0.35
  13   1  23    1.88    0.29
  13   1  24    6.56    0.33
  13   1  25    0.62    0.29
  13   1  26    5.13    0.34
  13   1  27    0.40    0.31
  13   1  28    2.93    0.34
 -23   0   9    0.35    0.56
  13   0  14    1.43    0.30
  14   0  17    2.13    0.32
  15   0  22    0.19    0.31
  15   0  23    0.04    0.33
  15   0  24    0.22    0.30
  15   0  25    0.17    0.31
  15   0  26    0.17    0.32
  15   0  27    0.17    0.33
 -12  -1  -2    0.56    0.33
  -8  -1  -3    0.28    0.28
  -4  -1  -3    0.25    0.29
  12  -1   8    0.03    0.34
  14  -1  12    0.25    0.30
  16  -1  18    0.04    0.32
 -21  -2   2    0.27    0.42
 -20  -2   1    0.83    0.38
 -14  -2  -3    5.01    0.32
 -11  -2  -4    0.25    0.27
  -1  -2  -4    1.48    0.30
   2  -2  -3  709.76    2.03
  17  -2  17   -0.02    0.35
 -18  -3  -2    0.56    0.32
 -12  -3  -5    0.36    0.28
  -7  -3  -6    9.78    0.30
  -6  -3  -6    0.63    0.25
  -5  -3  -6  159.08    0.79
   0  -3  -5    0.42    0.25
   6  -3  -2    0.69    0.29
  17  -3  13    1.88    0.68
 -22  -4   0    3.67    0.39
 -15  -4  -5    0.04    0.25
 -12  -4  -6   18.53    0.38
  -7  -4  -7    0.66    0.24
  -6  -4  -7   12.43    0.30
  -5  -4  -7    0.33    0.23
   0  -4  -6    1.57    0.24
 -18  -5  -4    0.22    0.30
 -14  -5  -6    0.17    0.28
 -11  -5  -7   15.39    0.31
  -1  -5  -7   19.71    0.33
   2  -5  -6    1.02    0.24
   4  -5  -5    0.68    0.23
   6  -5  -4    1.16    0.25
  15  -5   6    6.25    0.42
 -20  -6  -3    0.17    0.36
 -19  -6  -4    0.21    0.29
 -17  -6  -5   -0.09    0.32
 -15  -6  -6    0.19    0.32
 -13  -6  -7   -0.02    0.26
  -9  -6  -8    0.30    0.25
  -8  -6  -8   22.08    0.34
  -7  -6  -8    1.00    0.25
  -6  -6  -8   38.45    0.39
  -5  -6  -8    0.58    0.24
  -4  -6  -8   12.46    0.29
  -3  -6  -8    1.66    0.23
   1  -6  -7    0.70    0.24
   3  -6  -6    0.56    0.24
   5  -6  -5    0.51    0.24
   8  -6  -3    2.11    0.25
  16  -6   7    0.02    0.34
  19  -6  15    0.08    0.69
 -19  -7  -4   -0.12    0.35
 -16  -7  -6   -0.04    0.28
 -13  -7  -7    0.15    0.28
 -10  -7  -8    0.89    0.25
  -9  -7  -8   21.03    0.34
  -3  -7  -8    0.36    0.25
  -2  -7  -8    0.70    0.26
   1  -7  -7    6.41    0.27
   7  -7  -4    5.24    0.24
  15  -7   5    1.32    0.35
 -16  -8  -6    0.03    0.30
 -13  -8  -7    0.20    0.29
 -10  -8  -8   11.64    0.31
  -9  -8  -8    0.40    0.26
  -8  -8  -8    1.42    0.26
  -4  -8  -8   15.10    0.30
  -3  -8  -8    0.74    0.25
  -2  -8  -8    1.28    0.25
   1  -8  -7    0.58    0.24
   7  -8  -4    0.40    0.25
   8  -8  -3    0.76    0.28
  13  -8   2    0.52    0.31
 -15  -9  -6    3.82    0.34
 -13  -9  -7    2.75    0.28
 -12  -9  -7    0.28    0.26
  -9  -9  -8    0.15    0.25
  -8  -9  -8    0.66    0.26
  -7  -9  -8    2.32    0.27
  -6  -9  -8   -0.02    0.26
  -5  -9  -8    0.40    0.26
  -4  -9  -8    1.09    0.28
   0  -9  -7    0.34    0.25
   3  -9  -6    1.80    0.28
   5  -9  -5    1.33    0.26
   8  -9  -3    0.61    0.26
   9  -9  -2    0.19    0.27
  10  -9  -1    0.22    0.27
  11  -9   0    2.07    0.30
  12  -9   1    0.07    0.29
  14  -9   4    0.29    0.35
 -11 -10  -7   -0.09    0.30
 -10 -10  -7    1.10    0.30
  -3 -10  -7    0.14    0.25
  -2 -10  -7    2.14    0.29
  -1 -10  -7    1.00    0.27
   1 -10  -6    0.44    0.26
   2 -10  -6   -0.25    0.25
   4 -10  -5    4.90    0.28
   7 -10  -3    0.25    0.29
   8 -10  -2    0.23    0.31
  12 -10   2    1.38    0.34
  13 -10   3    0.00    0.34
  -1 -11  -6    3.40    0.32
   2 -11  -5    0.38    0.31
   4 -11  -4    0.12    0.29
   6 -11  -3   -0.27    0.29
   7 -11  -2    0.31    0.32
   8 -11  -1   -0.13    0.33
 -15   4  21    0.09    0.35
 -15   4  22    0.04    0.32
 -15   4  23   -0.11    0.32
 -14   4  19    4.22    0.30
 -14   4  20    1.02    0.29
 -13   4  18    0.02    0.25
 -12   4  17    4.21    0.27
 -11   4  16    0.06    0.25
 -10   4  15   15.79    0.30
  -9   4  15   -0.08    0.23
  -7   4  14    0.43    0.24
  -6   4  14    2.44    0.25
  -5   4  14    0.68    0.24
  -4   4  15   38.22    0.35
  -3   4  15    0.22    0.25
  -2   4  15   14.10    0.30
  -2   4  16    0.10    0.18
  -1   4  16    0.46    0.24
   0   4  17   14.58    0.31
   1   4  18    0.29    0.24
   1   4  19    0.47    0.23
   2   4  20    9.03    0.28
   2   4  21    0.84    0.25
   3   4  22    0.06    0.24
   3   4  23    0.22    0.25
   3   4  24    0.01    0.24
   3   4  25    0.20    0.25
   3   4  26    0.28    0.26
   3   4  27    0.27    0.28
   3   4  28    0.15    0.29
   3   4  29    0.30    0.30
   3   4  30   -0.51    0.32
 -19   3  18    4.67    0.38
 -19   3  19    3.15    0.34
 -18   3  16   -0.05    0.31
 -17   3  15    2.72    0.29
 -16   3  13    0.40    0.29
 -15   3  12   14.99    0.38
 -12   3  10    0.09    0.25
 -10   3   9    0.21    0.22
  -3   3   9   10.63    0.25
  -2   3   9    0.65    0.24
   0   3  10    0.19    0.24
   1   3  11   57.45    0.46
   4   3  14    0.34    0.23
   5   3  15    0.61    0.25
   6   3  17    0.66    0.25
   7   3  19    7.67    0.26
   7   3  20    6.19    0.28
   8   3  24   -0.15    0.25
   8   3  25    0.32    0.27
   8   3  26   -0.18    0.27
   8   3  27    0.20    0.29
   8   3  28    0.26    0.30
   8   3  29   -0.13    0.34
 -22   2  17    0.41    0.37
 -21   2  15    0.25    0.34
 -20   2  13    2.89    0.37
 -18   2  10    0.59    0.33
 -17   2   9    0.05    0.32
 -16   2   8   22.24    0.48
 -13   2   6    0.11    0.28
  -2   2   5    8.09    0.31
   2   2   7   77.14    0.60
   7   2  12    0.20    0.25
   9   2  16    0.32    0.23
  10   2  18    1.44    0.27
  10   2  19   19.84    0.33
  11   2  23    0.09    0.28
  11   2  24    0.02    0.27
  11   2  25    0.05    0.29
  11   2  26    0.09    0.28
  11   2  27    0.08    0.29
  11   2  28    0.11    0.31
  11   2  29   -0.26    0.33
 -23   1  13    1.06    0.43
 -11   1   2   35.89    0.80
   1   1   3   74.92    0.83
  10   1  12    0.26    0.23
  11   1  14   23.27    0.39
  13   1  20    7.64    0.33
  13   1  21    0.25    0.27
  -7   0  -1    0.62    0.48
  10   0   8    7.17    0.34
  14   0  16    0.73    0.27
  15   0  20   -0.18    0.30
  15   0  21    0.29    0.27
 -16  -1   0    0.07    0.39
  -7  -1  -3   79.46    0.81
  -6  -1  -3    0.08    0.27
  -5  -1  -3   34.61    0.58
  15  -1  14    0.95    0.32
  17  -1  24    3.58    0.38
  18  -2  22    3.29    0.46
  18  -2  23    0.13    0.40
  12  -3   4    0.04    0.35
 -18  -4  -3    1.51    0.31
 -14  -4  -5   13.92    0.36
 -11  -4  -6   -0.17    0.27
  -1  -4  -6    2.40    0.24
   2  -4  -5   87.10    0.58
   6  -4  -3   55.68    0.52
  13  -4   4    0.23    0.32
 -19  -5  -3    1.09    0.33
 -16  -5  -5    0.15    0.26
 -10  -5  -7   -0.07    0.22
  -2  -5  -7    1.52    0.25
   7  -5  -3    4.51    0.26
  13  -5   3   13.64    0.39
  16  -5   8    0.15    0.37
 -22  -6  -1    2.71    0.41
 -21  -6  -2    0.04    0.35
 -12  -6  -7   13.34    0.31
   0  -6  -7    0.07    0.24
   6  -6  -4   26.56    0.39
   9  -6  -2   -0.10    0.24
  10  -6  -1    3.06    0.25
  11  -6   0    0.04    0.26
 -20  -7  -3    0.09    0.33
 -17  -7  -5    0.06    0.30
 -15  -7  -6    1.41    0.28
 -12  -7  -7    0.26    0.25
  -8  -7  -8    0.62    0.23
  -7  -7  -8    2.73    0.26
  -6  -7  -8    0.43    0.25
  -5  -7  -8   13.37    0.31
  -4  -7  -8    0.71    0.24
   0  -7  -7   -0.03    0.24
   3  -7  -6   14.57    0.31
   5  -7  -5    0.82    0.24
   8  -7  -3    2.24    0.24
   9  -7  -2    2.44    0.25
  10  -7  -1   -0.19    0.27
  11  -7   0   19.95    0.39
  12  -7   1    0.19    0.29
  16  -7   7   -0.13    0.37
  17  -7   9    4.58    0.42
 -17  -8  -5   -0.06    0.31
 -15  -8  -6    0.38    0.29
 -12  -8  -7    8.17    0.31
  -7  -8  -8    0.00    0.23
  -6  -8  -8    4.91    0.27
  -5  -8  -8    0.69    0.24
   0  -8  -7    3.35    0.26
   3  -8  -6    0.32    0.24
   5  -8  -5    0.56    0.23
   9  -8  -2   -0.06    0.26
  10  -8  -1    5.62    0.31
  11  -8   0   -0.15    0.27
  12  -8   1   -0.09    0.28
  16  -8   7    4.89    0.40
  17  -8   9   -0.13    0.39
 -16  -9  -5    0.31    0.32
 -14  -9  -6   -0.03    0.32
 -11  -9  -7    0.19    0.27
 -10  -9  -7    0.24    0.26
  -2  -9  -7    0.35    0.26
  -1  -9  -7    0.09    0.26
   2  -9  -6    0.65    0.26
   4  -9  -5    0.35    0.26
   6  -9  -4    0.18    0.25
   7  -9  -3    1.32    0.28
  13  -9   3    3.61    0.35
 -12 -10  -6    0.27    0.31
  -9 -10  -7   -0.25    0.27
  -8 -10  -7    0.58    0.29
  -7 -10  -7    0.15    0.30
  -6 -10  -7    1.23    0.29
  -5 -10  -7    0.26    0.28
  -4 -10  -7    0.39    0.28
   0 -10  -6    1.25    0.29
   3 -10  -5    0.12    0.29
   5 -10  -4   -0.32    0.27
   6 -10  -3    2.96    0.31
   9 -10  -1    0.14    0.28
  10 -10   0    0.03    0.33
  11 -10   1    0.11    0.31
  -6 -11  -6   -0.03    0.31
  -5 -11  -6    1.18    0.31
  -4 -11  -6    0.13    0.31
  -3 -11  -6    6.04    0.33
   0 -11  -5    0.19    0.27
   1 -11  -5    1.49    0.31
   3 -11  -4    1.82    0.31
   5 -11  -3    0.58    0.31
   6 -11  -2    0.39    0.33
 -16   4  21    1.67    0.36
 -16   4  22    1.88    0.33
 -16   4  23    4.20    0.36
 -15   4  19    0.11    0.29
 -15   4  20    0.04    0.28
 -14   4  18    0.50    0.28
 -13   4  17   -0.08    0.27
 -12   4  16    8.22    0.30
 -11   4  15    0.26    0.23
 -10   4  14    4.11    0.28
  -9   4  14   -0.08    0.23
  -8   4  14    2.78    0.24
  -4   4  14    4.01    0.25
  -3   4  14    0.24    0.23
  -1   4  15    0.12    0.23
   0   4  16    1.59    0.26
   1   4  17    0.12    0.24
   2   4  18    8.02    0.28
   2   4  19    7.06    0.26
   3   4  20    0.37    0.25
   3   4  21    0.13    0.23
   4   4  23    0.29    0.26
   4   4  24    4.03    0.28
   4   4  25   -0.33    0.27
   4   4  26    1.06    0.27
   4   4  27    3.05    0.30
   4   4  28    0.36    0.29
   4   4  29    0.80    0.32
   4   4  30    0.39    0.31
 -19   3  17    1.40    0.34
 -17   3  14    4.28    0.33
 -14   3  11    0.08    0.25
 -13   3  10   13.23    0.37
 -11   3   9    1.81    0.24
  -8   3   8    0.50    0.24
  -7   3   8   17.03    0.34
  -6   3   8   -0.05    0.24
  -5   3   8   21.54    0.36
  -4   3   8    0.47    0.24
  -1   3   9  114.18    0.64
   2   3  11    0.45    0.24
   3   3  12    9.11    0.28
   4   3  13    0.07    0.23
   6   3  16    1.24    0.25
   7   3  18   18.96    0.32
   8   3  21    0.41    0.24
   8   3  22    0.33    0.25
   8   3  23    0.19    0.23
   8   3  30   -0.12    0.33
 -22   2  16    0.71    0.41
 -21   2  14    0.03    0.38
 -19   2  11    0.26    0.34
 -15   2   7    0.17    0.31
 -11   2   5    0.02    0.25
   1   2   6    0.39    0.25
   4   2   8   48.42    0.49
   5   2   9    0.63    0.25
   6   2  10    0.91    0.27
   8   2  13   10.60    0.30
   9   2  15   -0.02    0.23
  10   2  17   11.76    0.29
  11   2  21    0.56    0.27
  11   2  22   -0.09    0.28
 -22   1  11    0.09    0.38
 -19   1   7   17.95    0.57
 -18   1   6    0.03    0.40
   3   1   4   23.92    0.51
   9   1  10    5.95    0.28
  12   1  16    0.03    0.25
  13   1  19    9.72    0.31
  14   1  25   -0.24    0.34
  14   1  26    0.06    0.35
  14   1  27    0.14    0.37
  -5   0  -1    0.24    0.53
   4   0   2  159.63    1.95
  12   0  11   -0.02    0.29
  13   0  13    0.94    0.30
  15   0  19    0.11    0.30
  16  -1  17    0.23    0.31
  17  -1  22    1.14    0.34
  17  -1  23    4.09    0.37
 -17  -2  -1    0.14    0.31
 -10  -2  -4    4.20    0.27
  -2  -2  -4  118.25    0.81
  16  -2  13    0.77    0.38
  17  -2  16    0.12    0.39
  18  -2  21    3.87    0.44
 -24  -3   4   -0.14    0.44
 -19  -3  -1    4.53    0.35
 -16  -3  -3    0.81    0.28
 -14  -3  -4    0.19    0.26
 -11  -3  -5    7.28    0.28
  -1  -3  -5   20.18    0.37
   2  -3  -4    1.04    0.24
   4  -3  -3    0.42    0.23
  18  -3  16    0.05    0.48
  19  -3  21    0.72    0.49
 -19  -4  -2    0.24    0.32
 -16  -4  -4    5.83    0.28
 -10  -4  -6    2.49    0.25
  -2  -4  -6   51.13    0.46
   4  -4  -4    8.77    0.30
   7  -4  -2    1.35    0.25
 -20  -5  -2    0.21    0.30
 -17  -5  -4    0.35    0.29
 -15  -5  -5    9.53    0.34
 -13  -5  -6    7.80    0.29
  -9  -5  -7    3.88    0.26
  -8  -5  -7    0.53    0.24
  -7  -5  -7   25.08    0.35
  -6  -5  -7    0.39    0.25
  -5  -5  -7   22.78    0.34
  -4  -5  -7    0.84    0.23
  -3  -5  -7    3.90    0.24
   1  -5  -6   36.80    0.40
   3  -5  -5   49.68    0.45
   5  -5  -4   24.61    0.36
   8  -5  -2    0.13    0.23
  12  -5   2    0.37    0.30
  18  -5  13    0.10    0.60
 -18  -6  -4    0.42    0.30
 -16  -6  -5    2.94    0.29
 -14  -6  -6    1.43    0.26
 -11  -6  -7    0.21    0.23
 -10  -6  -7   10.74    0.29
  -2  -6  -7   28.78    0.36
  -1  -6  -7    0.57    0.23
   2  -6  -6    4.41    0.25
   4  -6  -5    7.06    0.27
  14  -6   4    0.14    0.29
  18  -6  12    2.11    0.49
 -18  -7  -4   -0.29    0.31
 -16  -7  -5   -0.08    0.29
 -14  -7  -6    0.37    0.26
 -11  -7  -7    5.98    0.27
  -1  -7  -7    6.48    0.28
   2  -7  -6    1.05    0.24
   4  -7  -5    0.46    0.24
   6  -7  -4    0.42    0.23
 -18  -8  -4    3.18    0.35
 -16  -8  -5   -0.10    0.29
 -14  -8  -6    4.42    0.31
 -11  -8  -7    0.61    0.26
 -10  -8  -7    8.73    0.31
  -2  -8  -7    0.47    0.23
  -1  -8  -7    0.08    0.23
   2  -8  -6    3.28    0.27
   4  -8  -5    7.03    0.28
   6  -8  -4    4.83    0.25
   7  -8  -3    0.41    0.27
 -15  -9  -5    2.27    0.33
 -13  -9  -6    3.17    0.31
  -9  -9  -7    8.66    0.31
  -8  -9  -7   -0.09    0.27
  -7  -9  -7    4.22    0.28
  -6  -9  -7   -0.11    0.27
  -5  -9  -7   12.22    0.32
  -4  -9  -7    0.64    0.26
  -3  -9  -7    3.03    0.27
   1  -9  -6    5.14    0.28
   3  -9  -5    3.78    0.28
   5  -9  -4    3.44    0.27
   8  -9  -2   -0.05    0.27
   9  -9  -1    1.60    0.32
  10  -9   0    0.01    0.30
  11  -9   1    1.77    0.32
  12  -9   2    0.19    0.29
 -11 -10  -6   -0.06    0.30
 -10 -10  -6    4.39    0.32
  -2 -10  -6   -0.18    0.27
  -1 -10  -6    0.47    0.29
   2 -10  -5    3.32    0.29
   4 -10  -4    0.69    0.27
   7 -10  -2    0.11    0.29
   8 -10  -1    1.15    0.31
  12 -10   3    0.48    0.34
  -2 -11  -5   -0.04    0.27
  -1 -11  -5   -0.34    0.32
   2 -11  -4    0.08    0.31
   4 -11  -3   -0.01    0.30
   7 -11  -1   -0.19    0.31
   8 -11   0   -0.25    0.33
 -10   5  25    0.20    0.27
 -10   5  26    0.07    0.28
 -10   5  27   -0.20    0.31
  -9   5  23    4.14    0.27
  -9   5  24    0.46    0.28
  -9   5  25    1.02    0.28
  -9   5  26    0.81    0.30
  -9   5  27    0.19    0.31
  -8   5  22    0.06    0.29
  -8   5  23    0.03    0.27
  -8   5  24   -0.09    0.29
  -8   5  25    0.17    0.29
  -8   5  26   -0.04    0.29
  -8   5  27    0.45    0.29
  -7   5  22    5.60    0.27
  -7   5  23    4.62    0.30
  -7   5  24    7.10    0.31
  -7   5  25    8.58    0.30
  -7   5  26    1.48    0.28
  -7   5  27    0.53    0.27
  -7   5  28    1.23    0.29
  -6   5  22    0.47    0.27
  -6   5  23    0.48    0.27
  -6   5  24    0.87    0.27
  -6   5  25    0.49    0.26
  -6   5  26    0.27    0.27
  -6   5  27    0.19    0.27
  -6   5  28   -0.01    0.29
  -5   5  22    2.50    0.25
  -5   5  23    1.38    0.28
  -5   5  24    7.17    0.30
  -5   5  25    3.82    0.27
  -5   5  26    0.20    0.27
  -5   5  27    2.24    0.28
  -5   5  28    0.81    0.28
  -5   5  29    1.56    0.33
  -4   5  23    0.45    0.25
  -4   5  24    0.03    0.27
  -4   5  25    0.29    0.28
  -4   5  26    0.35    0.28
  -4   5  27    0.02    0.30
  -4   5  28    0.41    0.30
  -4   5  29   -0.49    0.32
  -3   5  24    8.13    0.30
  -3   5  25    1.73    0.28
  -3   5  26    0.81    0.28
  -3   5  27    3.49    0.29
  -3   5  28    1.34    0.31
  -3   5  29    2.02    0.34
  -2   5  26    0.08    0.26
  -2   5  27    0.33    0.26
  -2   5  28   -0.09    0.28
 -17   4  22   -0.05    0.34
 -16   4  20    4.86    0.34
 -15   4  18    0.19    0.27
 -14   4  17    3.50    0.29
 -13   4  16    0.13    0.26
 -12   4  15    0.42    0.24
 -11   4  14    0.49    0.23
  -9   4  13    0.01    0.23
  -8   4  13    1.80    0.24
  -7   4  13   -0.07    0.24
  -6   4  13    4.94    0.25
  -5   4  13   -0.07    0.23
  -4   4  13    3.06    0.24
  -3   4  13    0.09    0.23
  -2   4  14    2.78    0.19
  -1   4  14    0.28    0.24
   0   4  15    8.36    0.28
   1   4  16    0.32    0.24
   2   4  17    0.47    0.25
   3   4  18    0.35    0.22
   3   4  19    0.20    0.24
   4   4  20    1.59    0.26
   4   4  21    5.43    0.27
   4   4  22    1.05    0.18
   5   4  23   -0.33    0.25
   5   4  24    0.33    0.27
   5   4  25    0.58    0.25
   5   4  26    0.17    0.27
   5   4  27    0.26    0.28
   5   4  28    0.01    0.30
   5   4  29   -0.04    0.30
   5   4  30    0.35    0.32
 -20   3  19    0.00    0.32
 -19   3  16   12.56    0.41
 -18   3  15    0.16    0.27
 -17   3  13    2.11    0.31
 -16   3  12    0.52    0.30
 -15   3  11   13.31    0.36
 -12   3   9    0.16    0.31
  -9   3   8   39.65    0.45
  -3   3   8   19.72    0.35
   1   3  10   28.67    0.37
   5   3  14    3.48    0.20
   6   3  15    0.47    0.24
   7   3  17   30.34    0.37
   8   3  19    1.54    0.23
   8   3  20    0.04    0.25
   9   3  23   12.66    0.30
   9   3  24    7.95    0.30
   9   3  25    1.78    0.28
   9   3  26    4.42    0.31
   9   3  27    2.44    0.31
   9   3  28   -0.20    0.31
   9   3  29    0.24    0.32
 -20   2  12    0.17    0.35
  -8   2   4   10.22    0.36
  -7   2   4    0.18    0.22
  -6   2   4   30.09    0.46
  -5   2   4    0.34    0.22
  -1   2   5    0.82    0.19
   3   2   7    0.83    0.24
   7   2  11    0.27    0.24
   9   2  14    0.17    0.24
  10   2  16   25.82    0.38
  11   2  19   -0.02    0.25
  11   2  20    0.41    0.26
  12   2  24    1.42    0.29
  12   2  25    1.58    0.30
  12   2  26    2.89    0.32
  12   2  27   11.92    0.37
  12   2  28    0.54    0.33
 -20   1   8    0.24    0.38
 -17   1   5   35.85    0.78
  10   1  11   -0.14    0.27
  11   1  13   23.29    0.40
  12   1  15    0.16    0.29
  13   1  18    5.64    0.30
  14   1  22    0.26    0.33
  14   1  23    0.19    0.29
  14   1  24   -0.03    0.29
 -14   0   1    0.08    0.63
  -6   0  -1  183.05    2.43
  11   0   9    0.37    0.27
  14   0  15    3.57    0.32
  15   0  18    0.12    0.30
  16   0  24    2.78    0.36
  16   0  25    2.10    0.37
  16   0  26    0.21    0.37
 -14  -1  -1    0.17    0.32
  10  -1   5    0.67    0.47
  17  -1  21    0.57    0.36
 -15  -2  -2    0.90    0.32
 -13  -2  -3    0.00    0.22
  -9  -2  -4    0.61    0.28
  -3  -2  -4    0.81    0.26
   1  -2  -3    4.79    0.34
  18  -2  20    0.11    0.40
 -23  -3   3    1.59    0.42
 -21  -3   1    1.86    0.37
 -20  -3   0    0.57    0.35
 -10  -3  -5    0.08    0.23
  -2  -3  -5    0.09    0.24
  11  -3   3    5.27    0.40
  19  -3  20    1.69    0.51
 -24  -4   3    1.78    0.44
 -20  -4  -1    3.59    0.35
 -17  -4  -3    0.13    0.29
 -13  -4  -5    0.10    0.26
  -9  -4  -6    0.11    0.25
  -3  -4  -6    1.70    0.24
   1  -4  -5    1.31    0.26
  12  -4   3    5.65    0.37
 -23  -5   1    0.20    0.41
 -22  -5   0   -0.03    0.34
 -21  -5  -1    1.81    0.30
 -18  -5  -3    0.18    0.30
 -12  -5  -6    0.12    0.23
   0  -5  -6    0.52    0.24
   9  -5  -1   30.47    0.41
 -20  -6  -2    0.14    0.36
 -19  -6  -3    0.11    0.30
 -17  -6  -4    0.71    0.31
 -15  -6  -5   -0.16    0.30
 -13  -6  -6    0.32    0.26
  -9  -6  -7    0.31    0.24
  -8  -6  -7    5.13    0.27
  -7  -6  -7    0.64    0.24
  -6  -6  -7   21.21    0.32
  -5  -6  -7    0.55    0.23
  -4  -6  -7    4.85    0.27
  -3  -6  -7    1.42    0.24
   1  -6  -6    1.14    0.23
   5  -6  -4    0.13    0.26
   7  -6  -3    0.12    0.23
   8  -6  -2   10.45    0.32
  15  -6   6    0.23    0.33
 -19  -7  -3    0.01    0.30
 -13  -7  -6    7.79    0.29
 -10  -7  -7    0.41    0.23
  -9  -7  -7    7.59    0.28
  -8  -7  -7    0.03    0.22
  -4  -7  -7    0.64    0.23
  -3  -7  -7    6.13    0.28
  -2  -7  -7    1.11    0.23
   1  -7  -6   19.68    0.32
   7  -7  -3    7.72    0.27
  18  -7  12    0.01    0.46
 -17  -8  -4    0.15    0.32
 -15  -8  -5   -0.07    0.29
 -13  -8  -6    0.96    0.28
  -9  -8  -7    0.91    0.27
  -8  -8  -7    7.18    0.29
  -7  -8  -7    0.34    0.25
  -6  -8  -7    5.23    0.28
  -5  -8  -7    0.06    0.25
  -4  -8  -7    5.44    0.27
  -3  -8  -7    0.37    0.22
   1  -8  -6    0.36    0.24
   3  -8  -5    0.75    0.25
   5  -8  -4    1.01    0.25
   8  -8  -2    3.07    0.27
   9  -8  -1    0.31    0.30
  12  -8   2    0.98    0.31
  13  -8   3    0.36    0.27
  15  -8   6   -0.16    0.32
  16  -8   8    0.29    0.38
  17  -8  10    0.08    0.40
 -16  -9  -4    0.02    0.34
 -14  -9  -5    0.26    0.31
 -12  -9  -6    0.44    0.26
 -11  -9  -6    4.10    0.29
  -1  -9  -6    4.60    0.28
   0  -9  -6    0.60    0.24
   2  -9  -5    1.54    0.27
   4  -9  -4    0.13    0.24
   6  -9  -3    0.50    0.25
  14  -9   5   -0.05    0.31
 -13 -10  -5   -0.15    0.30
 -12 -10  -5   -0.10    0.30
  -9 -10  -6    0.21    0.27
  -8 -10  -6    0.01    0.30
  -7 -10  -6    0.02    0.28
  -6 -10  -6    0.47    0.29
  -5 -10  -6   -0.08    0.28
  -4 -10  -6    6.25    0.30
  -3 -10  -6    0.56    0.25
   0 -10  -5    7.93    0.31
   1 -10  -5    0.72    0.26
   3 -10  -4    0.28    0.28
   5 -10  -3    0.03    0.26
   9 -10   0   -0.14    0.28
  10 -10   1    1.10    0.33
  11 -10   2    0.35    0.32
  -7 -11  -5    1.19    0.32
  -6 -11  -5    0.48    0.31
  -5 -11  -5    0.18    0.31
  -4 -11  -5   -0.06    0.30
  -3 -11  -5    0.67    0.32
   0 -11  -4   -0.08    0.29
   1 -11  -4    0.82    0.28
   3 -11  -3    3.55    0.31
   5 -11  -2    0.91    0.32
   6 -11  -1    0.17    0.29
 -12   5  25    0.13    0.28
 -11   5  23    7.41    0.33
 -11   5  24    1.45    0.32
 -11   5  25    0.48    0.32
 -11   5  26    0.22    0.32
 -10   5  22    0.32    0.27
 -10   5  23    0.02    0.29
 -10   5  24    0.20    0.28
  -9   5  21    1.11    0.26
  -9   5  22    0.20    0.28
  -8   5  20    0.10    0.24
  -8   5  21    0.04    0.26
  -7   5  20    1.44    0.26
  -7   5  21    0.29    0.27
  -6   5  20    0.47    0.25
  -6   5  21    0.31    0.27
  -5   5  20    4.35    0.26
  -5   5  21    5.98    0.28
  -4   5  20    0.38    0.23
  -4   5  21    0.19    0.25
  -4   5  22    0.10    0.18
  -3   5  21    0.61    0.25
  -3   5  22    7.93    0.29
  -3   5  23    7.77    0.23
  -2   5  22    0.23    0.26
  -2   5  23   -0.46    0.27
  -2   5  24    0.08    0.25
  -2   5  25   -0.21    0.21
  -2   5  29    0.03    0.24
  -1   5  23    3.50    0.25
  -1   5  24    6.52    0.29
  -1   5  25    0.86    0.27
  -1   5  26    0.13    0.28
  -1   5  27   -0.14    0.29
  -1   5  28   -0.09    0.30
  -1   5  29   -0.48    0.32
   0   5  26    0.36    0.24
   0   5  27   -0.09    0.26
   0   5  28    0.13    0.28
   0   5  29    0.07    0.28
 -17   4  20    0.09    0.31
 -17   4  21    0.27    0.33
 -16   4  18   -0.08    0.34
 -16   4  19    0.40    0.29
 -15   4  17    0.19    0.27
 -14   4  16    5.03    0.30
 -13   4  15    0.02    0.25
 -12   4  14    7.44    0.28
 -11   4  13    0.41    0.28
 -10   4  13   20.52    0.33
  -8   4  12    0.19    0.23
  -7   4  12    0.43    0.23
  -6   4  12    0.61    0.24
  -5   4  12    0.23    0.23
  -4   4  12    7.28    0.26
  -2   4  13   15.66    0.31
   0   4  14   20.88    0.33
   1   4  15    0.70    0.24
   2   4  16    0.14    0.24
   3   4  17   -0.10    0.24
   4   4  19   22.67    0.34
   5   4  21    0.55    0.25
   5   4  22    0.23    0.25
   6   4  24    7.65    0.31
   6   4  25    2.38    0.28
   6   4  26    4.07    0.30
   6   4  27    0.33    0.29
   6   4  28    0.32    0.30
   6   4  29    0.44    0.30
   6   4  30    0.27    0.28
 -20   3  18   -0.05    0.32
 -18   3  14    0.20    0.30
 -14   3  10    0.14    0.24
 -10   3   8   -0.17    0.23
  -2   3   8    0.40    0.24
   0   3   9    1.17    0.18
   2   3  10    0.20    0.23
   3   3  11   19.88    0.34
   4   3  12    0.09    0.23
   5   3  13    9.39    0.29
   6   3  14    0.33    0.23
   7   3  16    5.35    0.27
   8   3  18    1.39    0.24
   9   3  21   10.89    0.30
   9   3  22    1.04    0.25
 -22   2  15   -0.58    0.45
 -21   2  13   -0.19    0.37
 -14   2   6    2.51    0.31
 -12   2   5   22.03    0.46
  -4   2   4   11.79    0.34
   8   2  12   15.97    0.33
  11   2  18    0.29    0.24
  12   2  22    1.86    0.29
  12   2  23    2.22    0.28
 -23   1  12    1.11    0.44
 -21   1   9    2.07    0.41
 -14   1   3    0.19    0.41
   6   1   6    0.76    0.22
   7   1   7   51.27    0.56
   8   1   8   -0.03    0.28
  13   1  17   11.66    0.35
  14   1  21   -0.24    0.27
 -24   0  10    3.98    0.76
  16   0  22    0.09    0.32
  16   0  23    3.53    0.36
 -11  -1  -2   36.25    0.63
  14  -1  11    0.19    0.31
  15  -1  13   28.60    0.58
  16  -1  16    0.08    0.31
  17  -1  20    0.02    0.34
 -18  -2   0    5.17    0.39
  -8  -2  -4   10.06    0.33
  -4  -2  -4   12.18    0.34
   3  -2  -2    2.44    0.30
  18  -2  19    0.92    0.38
 -22  -3   2   -0.10    0.37
 -17  -3  -2   46.39    0.57
 -15  -3  -3   10.67    0.35
 -13  -3  -4    4.95    0.28
  -9  -3  -5   27.86    0.40
  -8  -3  -5    0.55    0.29
  -3  -3  -5    1.91    0.25
   1  -3  -4   25.47    0.39
   5  -3  -2    0.15    0.28
   9  -3   1   48.44    0.63
  10  -3   2    0.21    0.30
  15  -3   9    7.35    0.81
 -23  -4   2    0.19    0.38
 -22  -4   1    1.00    0.37
 -21  -4   0   -0.04    0.34
 -15  -4  -4    0.52    0.25
 -12  -4  -5    0.54    0.27
  -8  -4  -6    6.52    0.28
  -7  -4  -6    0.27    0.24
  -6  -4  -6   26.37    0.37
  -5  -4  -6    0.73    0.24
  -4  -4  -6   35.40    0.40
   3  -4  -4    1.46    0.26
   5  -4  -3    0.72    0.25
  11  -4   2    1.35    0.28
 -16  -5  -4    0.32    0.26
 -14  -5  -5    0.20    0.24
 -11  -5  -6    3.09    0.25
 -10  -5  -6   -0.18    0.27
  -1  -5  -6   38.28    0.40
   2  -5  -5    1.24    0.23
   4  -5  -4    1.13    0.25
   6  -5  -3    1.07    0.25
  14  -5   5    0.18    0.28
 -22  -6   0    4.64    0.43
 -21  -6  -1    0.33    0.35
 -12  -6  -6    7.55    0.28
   0  -6  -6    2.29    0.24
   3  -6  -5    1.16    0.22
   9  -6  -1    0.54    0.24
  10  -6   0    9.34    0.35
  11  -6   1    0.15    0.30
  16  -6   8    1.39    0.35
  17  -6  10    0.03    0.38
 -20  -7  -2    0.23    0.33
 -17  -7  -4    0.27    0.29
 -15  -7  -5    0.98    0.29
 -12  -7  -6    0.47    0.24
  -7  -7  -7    0.35    0.23
  -6  -7  -7    0.55    0.23
  -5  -7  -7   10.65    0.28
   0  -7  -6    0.03    0.25
   3  -7  -5    2.84    0.25
   5  -7  -4   17.71    0.32
   8  -7  -2    1.17    0.23
   9  -7  -1    1.34    0.24
  10  -7   0    0.02    0.27
  11  -7   1    1.81    0.30
  12  -7   2    0.25    0.28
  15  -7   6    1.41    0.32
  16  -7   8   -0.09    0.38
  17  -7  10    1.87    0.42
 -18  -8  -3    0.29    0.33
 -16  -8  -4    1.32    0.31
 -14  -8  -5    1.16    0.30
 -12  -8  -6    2.11    0.25
 -11  -8  -6    0.14    0.26
  -1  -8  -6    0.31    0.24
   0  -8  -6    2.02    0.17
   2  -8  -5    0.44    0.25
   6  -8  -3    2.00    0.26
  10  -8   0    5.42    0.29
  11  -8   1   -0.02    0.26
 -15  -9  -4    0.74    0.33
 -13  -9  -5    0.51    0.30
 -10  -9  -6    0.10    0.25
  -9  -9  -6    0.28    0.27
  -8  -9  -6    0.49    0.27
  -7  -9  -6    0.09    0.24
  -5  -9  -6    3.42    0.26
  -4  -9  -6   -0.08    0.25
  -3  -9  -6    1.75    0.27
  -2  -9  -6    0.10    0.25
   1  -9  -5    4.17    0.27
   5  -9  -3   -0.19    0.22
   7  -9  -2    4.93    0.29
   8  -9  -1   -0.38    0.27
  12  -9   3   -0.07    0.34
  13  -9   4    1.29    0.31
 -11 -10  -5    0.01    0.30
 -10 -10  -5    0.69    0.30
  -2 -10  -5    3.78    0.29
  -1 -10  -5    0.17    0.29
   2 -10  -4    1.25    0.29
   4 -10  -3    2.08    0.27
   6 -10  -2    0.47    0.25
   7 -10  -1    0.34    0.29
  12 -10   4    0.32    0.34
  -2 -11  -4   -0.25    0.30
  -1 -11  -4    1.16    0.31
   2 -11  -3    0.31    0.30
   4 -11  -2   -0.17    0.29
   7 -11   0   -0.13    0.30
   8 -11   1   -0.17    0.32
 -13   5  24    4.02    0.30
 -13   5  25    3.91    0.34
 -12   5  22    0.53    0.29
 -12   5  23    0.28    0.30
 -12   5  24    0.15    0.28
 -11   5  21    1.11    0.29
 -11   5  22    0.86    0.30
 -10   5  20   -0.01    0.25
 -10   5  21   -0.19    0.25
  -9   5  19    2.59    0.26
  -9   5  20    0.89    0.25
  -8   5  19    0.03    0.24
  -7   5  19    1.41    0.26
  -6   5  18   -0.18    0.23
  -6   5  19    0.43    0.24
  -5   5  19    4.59    0.27
  -4   5  19   -0.03    0.24
  -3   5  19    4.53    0.26
  -3   5  20   12.66    0.30
  -2   5  20    0.39    0.24
  -2   5  21   -0.08    0.24
  -1   5  21    3.57    0.25
  -1   5  22    0.28    0.25
   0   5  22    0.34    0.25
   0   5  23   -0.02    0.26
   0   5  24    0.12    0.27
   0   5  25    0.42    0.24
   1   5  24    6.32    0.27
   1   5  25    0.90    0.28
   1   5  26    1.22    0.28
   1   5  27    1.14    0.29
   1   5  28    0.24    0.31
   1   5  29    0.66    0.32
 -18   4  21    1.77    0.35
 -17   4  19    0.30    0.29
 -16   4  17    1.26    0.30
 -15   4  16    0.06    0.27
 -14   4  15    0.44    0.25
 -13   4  14    0.22    0.25
 -12   4  13    2.66    0.28
 -10   4  12   11.50    0.32
  -9   4  12    0.10    0.23
  -3   4  12    0.15    0.23
  -2   4  12   18.47    0.31
  -1   4  13    0.74    0.22
   1   4  14    0.04    0.24
   2   4  15   15.03    0.30
   3   4  16    0.09    0.24
   4   4  18    5.92    0.27
   5   4  19    0.10    0.25
   5   4  20   -0.10    0.25
   6   4  22   10.57    0.30
   6   4  23    0.21    0.26
   7   4  26   -0.41    0.28
   7   4  27    0.04    0.26
   7   4  28   -0.33    0.26
   7   4  29    0.43    0.33
 -20   3  17    0.16    0.30
 -19   3  15    0.56    0.32
 -16   3  11    0.10    0.29
 -13   3   9    4.01    0.29
 -11   3   8    3.24    0.25
  -8   3   7    1.57    0.28
  -7   3   7    7.66    0.29
  -6   3   7    0.79    0.25
  -5   3   7   60.05    0.52
  -4   3   7    1.16    0.24
  -1   3   8    9.69    0.29
   1   3   9  116.09    0.64
   7   3  15    4.91    0.26
   8   3  17    0.48    0.23
   9   3  19   13.40    0.33
   9   3  20    4.96    0.27
  10   3  23    0.10    0.27
  10   3  24   -0.08    0.29
  10   3  25   -0.24    0.29
  10   3  26    0.22    0.29
  10   3  27   -0.05    0.29
  10   3  28   -0.08    0.31
  10   3  29   -0.32    0.31
 -19   2  10    0.23    0.33
 -18   2   9    6.38    0.35
 -17   2   8    0.11    0.28
  -9   2   4    0.55    0.22
  -3   2   4    1.11    0.25
   0   2   5  132.09    0.80
   2   2   6  152.55    0.83
   5   2   8    0.65    0.25
   6   2   9   46.13    0.47
   7   2  10    0.37    0.28
   9   2  13   -0.32    0.24
  10   2  15    4.62    0.27
  11   2  17    0.09    0.23
  12   2  20    2.62    0.28
  12   2  21    4.21    0.30
  13   2  26   -0.18    0.32
  13   2  27   -0.23    0.33
  13   2  28   -0.05    0.34
   5   1   5   97.25    0.81
   9   1   9   18.72    0.38
  11   1  12    4.67    0.31
  12   1  14    1.45    0.27
  13   1  16    4.96    0.31
  14   1  19    0.03    0.28
  14   1  20   -0.15    0.27
  15   1  25    1.07    0.36
  15   1  26    0.27    0.34
   8   0   5    2.00    0.34
  13   0  12    0.44    0.29
  14   0  14   11.16    0.37
  15   0  17    0.16    0.30
  16   0  21    0.10    0.30
  13  -1   9    4.95    0.42
  17  -1  19    1.36    0.36
 -24  -2   6    5.87    0.66
 -12  -2  -3    0.03    0.26
  -7  -2  -4    0.48    0.23
  -6  -2  -4   31.24    0.45
  -5  -2  -4    0.37    0.24
  17  -2  15    0.28    0.38
 -12  -3  -4    0.00    0.28
  -7  -3  -5   15.33    0.34
  -6  -3  -5    1.16    0.25
  -5  -3  -5   26.64    0.39
  -4  -3  -5    0.45    0.23
   3  -3  -3   25.68    0.40
  19  -3  19    2.12    0.57
 -18  -4  -2    7.41    0.36
 -14  -4  -4    0.83    0.29
 -11  -4  -5    0.25    0.27
   0  -4  -5   12.45    0.30
  14  -4   6    0.69    0.35
 -20  -5  -1    0.00    0.30
 -19  -5  -2    0.62    0.28
 -13  -5  -5    3.72    0.27
  -9  -5  -6    7.99    0.28
  -3  -5  -6   12.51    0.29
  -2  -5  -6    0.63    0.23
   1  -5  -5   17.39    0.33
   7  -5  -2   22.10    0.36
 -19  -6  -2    0.02    0.33
 -18  -6  -3    0.43    0.28
 -16  -6  -4    3.22    0.30
 -14  -6  -5    5.19    0.28
 -11  -6  -6   -0.36    0.23
 -10  -6  -6    5.86    0.28
  -2  -6  -6    5.10    0.25
  -1  -6  -6    0.82    0.24
   2  -6  -5   12.13    0.29
   4  -6  -4    8.21    0.28
   6  -6  -3    1.46    0.25
  14  -6   5    5.56    0.37
 -19  -7  -2    0.49    0.34
 -18  -7  -3   -0.02    0.29
 -16  -7  -4   -0.08    0.27
 -14  -7  -5    0.49    0.26
 -11  -7  -6    1.34    0.24
 -10  -7  -6    0.25    0.24
  -2  -7  -6    1.43    0.24
  -1  -7  -6   19.82    0.32
   2  -7  -5    0.78    0.24
   4  -7  -4    0.56    0.25
   6  -7  -3    0.14    0.23
 -17  -8  -3    0.00    0.35
 -13  -8  -5    0.25    0.27
 -10  -8  -6    2.21    0.27
  -9  -8  -6    0.83    0.27
  -8  -8  -6    3.82    0.25
  -4  -8  -6    0.97    0.23
  -3  -8  -6    0.08    0.24
  -2  -8  -6    3.29    0.25
   1  -8  -5    0.12    0.25
   4  -8  -4   15.97    0.30
   7  -8  -2    0.06    0.25
  13  -8   4    0.50    0.31
  15  -8   7    0.26    0.32
 -14  -9  -4    0.51    0.32
 -12  -9  -5    0.01    0.27
 -11  -9  -5    2.37    0.26
  -6  -9  -6    0.22    0.24
  -1  -9  -5    3.20    0.26
   0  -9  -5    0.51    0.26
   3  -9  -4   12.64    0.30
   6  -9  -2   -0.14    0.24
   9  -9   0    0.21    0.27
  10  -9   1   -0.07    0.27
  11  -9   2    1.03    0.30
  14  -9   6   -0.09    0.35
 -13 -10  -4    0.13    0.29
 -12 -10  -4    0.34    0.30
  -9 -10  -5    0.21    0.27
  -8 -10  -5    2.42    0.31
  -7 -10  -5    0.08    0.29
  -6 -10  -5    0.75    0.27
  -5 -10  -5    0.38    0.28
  -4 -10  -5    3.50    0.28
  -3 -10  -5    0.16    0.25
   0 -10  -4    0.69    0.25
   1 -10  -4    0.42    0.25
   3 -10  -3   -0.17    0.28
   5 -10  -2   -0.33    0.27
   8 -10   0    0.33    0.29
   9 -10   1   -0.08    0.29
  10 -10   2    0.47    0.33
  11 -10   3   -0.15    0.32
  -7 -11  -4    1.51    0.32
  -6 -11  -4    0.09    0.31
  -5 -11  -4    1.77    0.32
  -4 -11  -4    0.01    0.29
  -3 -11  -4   -0.04    0.30
   0 -11  -3    0.46    0.31
   1 -11  -3    0.26    0.27
   3 -11  -2    0.08    0.29
   5 -11  -1   -0.09    0.29
   6 -11   0   -0.01    0.32
 -14   5  23    0.22    0.32
 -14   5  24   -0.10    0.33
 -13   5  21    2.19    0.31
 -13   5  22    3.37    0.31
 -13   5  23    0.20    0.30
 -12   5  20   -0.15    0.28
 -12   5  21    0.31    0.29
 -11   5  19    1.97    0.27
 -11   5  20    0.73    0.27
 -10   5  18    0.26    0.26
 -10   5  19    0.14    0.24
  -9   5  18    5.60    0.26
  -8   5  18    0.17    0.25
  -7   5  17    2.25    0.25
  -7   5  18    4.08    0.25
  -6   5  17    0.15    0.24
  -5   5  17    0.36    0.24
  -5   5  18    6.55    0.21
  -4   5  18   -0.22    0.25
  -3   5  18    2.42    0.25
  -2   5  18    0.56    0.22
  -2   5  19    0.15    0.25
  -1   5  19    0.96    0.25
  -1   5  20   17.07    0.30
   0   5  20    0.48    0.24
   0   5  21    0.19    0.25
   1   5  22   -0.25    0.26
   1   5  23    3.32    0.28
   2   5  24    0.49    0.27
   2   5  25    0.09    0.28
   2   5  26   -0.17    0.28
   2   5  27    0.02    0.30
   2   5  28   -0.04    0.30
   2   5  29    0.22    0.32
 -18   4  20    0.72    0.33
 -17   4  18   -0.06    0.29
 -16   4  16    1.06    0.33
 -15   4  15   -0.18    0.30
 -14   4  14    1.26    0.29
 -13   4  13    0.18    0.28
 -11   4  12    1.21    0.25
  -8   4  11    7.53    0.28
  -7   4  11   -0.04    0.25
  -6   4  11    1.19    0.25
  -5   4  11    0.06    0.24
  -4   4  11   24.87    0.35
  -1   4  12    0.52    0.23
   0   4  13    4.37    0.19
   2   4  14    2.72    0.25
   3   4  15    0.56    0.24
   4   4  17    4.83    0.20
   5   4  18    0.22    0.24
   6   4  20    2.64    0.25
   6   4  21   14.19    0.30
   7   4  23    0.06    0.26
   7   4  24    0.36    0.27
   7   4  25   -0.16    0.27
 -20   3  16    0.14    0.33
 -19   3  14    0.46    0.31
 -18   3  13    0.07    0.31
 -17   3  12    3.75    0.29
 -15   3  10   15.63    0.35
 -14   3   9    0.17    0.28
 -12   3   8    0.06    0.28
  -9   3   7   17.93    0.35
  -3   3   7   29.41    0.40
   0   3   8    0.20    0.24
   3   3  10   40.77    0.42
   4   3  11    0.18    0.23
   5   3  12   15.61    0.32
   6   3  13    0.27    0.23
   8   3  16    0.35    0.23
   9   3  18    1.01    0.24
  10   3  21    0.21    0.26
  10   3  22   -0.07    0.26
  11   3  28    2.79    0.34
 -22   2  14    2.04    0.44
 -20   2  11    0.75    0.37
 -16   2   7    7.25    0.35
 -10   2   4    4.10    0.30
  -2   2   4  118.83    0.82
   4   2   7   70.46    0.58
   8   2  11    4.63    0.27
  10   2  14   26.76    0.41
  11   2  16    0.25    0.28
  12   2  19    1.56    0.25
  13   2  23    0.35    0.32
  13   2  24   -0.13    0.30
  13   2  25    0.20    0.32
 -22   1  10    0.08    0.43
 -12   1   2    0.59    0.43
  -7   1   1   17.55    0.62
  -6   1   1    2.03    0.35
  -5   1   1   57.48    0.98
   2   1   3    0.28    0.29
  10   1  10    0.32    0.28
  15   1  23    0.19    0.34
  15   1  24    7.34    0.34
   7   0   4    0.20    0.32
   9   0   6    0.34    0.26
  12   0  10   23.10    0.47
  15   0  16    0.17    0.31
  16   0  20   -0.20    0.30
 -17  -1   1   13.24    0.55
  16  -1  15    0.32    0.32
 -19  -2   1    0.34    0.37
 -16  -2  -1    4.04    0.35
   0  -2  -3   68.08    0.68
  18  -2  18    1.36    0.42
 -18  -3  -1    0.30    0.30
   0  -3  -4    1.14    0.25
 -19  -4  -1    0.28    0.30
 -16  -4  -3    1.26    0.24
 -10  -4  -5    3.88    0.30
  -1  -4  -5    1.80    0.24
   2  -4  -4   45.91    0.45
   4  -4  -3   26.78    0.39
   6  -4  -2  104.81    0.68
 -23  -5   2    0.00    0.35
 -22  -5   1    0.02    0.34
 -21  -5   0    3.05    0.36
 -17  -5  -3    3.86    0.27
 -15  -5  -4    4.22    0.28
 -12  -5  -5    0.43    0.23
  -8  -5  -6    0.99    0.23
  -7  -5  -6   22.00    0.34
  -6  -5  -6    0.29    0.23
  -5  -5  -6    2.18    0.23
  -4  -5  -6    0.28    0.22
   3  -5  -4   25.36    0.36
   5  -5  -3    0.88    0.24
   8  -5  -1    0.02    0.23
  13  -5   4    3.67    0.31
  15  -5   7    0.61    0.36
 -20  -6  -1   -0.04    0.34
 -17  -6  -3    0.05    0.31
 -15  -6  -4    0.32    0.29
 -13  -6  -5    0.29    0.26
  -9  -6  -6    0.54    0.25
  -8  -6  -6   29.27    0.37
  -4  -6  -6    5.26    0.26
  -3  -6  -6    1.05    0.25
   1  -6  -5    0.21    0.23
   7  -6  -2    0.46    0.24
 -20  -7  -1    0.06    0.37
 -17  -7  -3    0.21    0.32
 -15  -7  -4    8.23    0.34
 -13  -7  -5    5.77    0.28
  -9  -7  -6    1.29    0.25
  -8  -7  -6    0.31    0.25
  -7  -7  -6    3.95    0.26
  -6  -7  -6    1.05    0.23
  -5  -7  -6    7.96    0.27
  -4  -7  -6    0.26    0.24
  -3  -7  -6   15.56    0.31
   1  -7  -5   14.26    0.31
   7  -7  -2    4.33    0.25
  18  -7  13    0.24    0.47
 -18  -8  -2    0.64    0.34
 -15  -8  -4    0.04    0.29
 -12  -8  -5    2.25    0.28
  -7  -8  -6    0.22    0.23
  -6  -8  -6    1.96    0.26
  -5  -8  -6   -0.05    0.23
   0  -8  -5    5.63    0.27
   3  -8  -4    0.72    0.25
   5  -8  -3    0.33    0.24
   8  -8  -1    3.89    0.27
   9  -8   0    0.26    0.25
  10  -8   1    6.05    0.33
  11  -8   2   -0.20    0.30
  12  -8   3    0.97    0.27
  16  -8   9    0.44    0.39
 -16  -9  -3   -0.01    0.29
 -13  -9  -4    1.10    0.30
 -10  -9  -5    0.23    0.28
  -9  -9  -5    1.04    0.27
  -3  -9  -5    4.11    0.27
  -2  -9  -5    1.38    0.27
   1  -9  -4    1.51    0.25
   2  -9  -4    0.01    0.25
   4  -9  -3   -0.10    0.26
   7  -9  -1    2.86    0.28
  13  -9   5   -0.04    0.34
 -11 -10  -4   -0.26    0.29
 -10 -10  -4    3.72    0.31
  -2 -10  -4    1.77    0.27
  -1 -10  -4   -0.25    0.28
   2 -10  -3    1.26    0.28
   4 -10  -2    0.29    0.27
   6 -10  -1    0.58    0.28
   7 -10   0    0.37    0.29
  12 -10   5   -0.12    0.34
  -2 -11  -3   -0.04    0.30
  -1 -11  -3   -0.39    0.31
   1 -11  -2    0.88    0.28
   2 -11  -2    0.09    0.30
   4 -11  -1   -0.04    0.30
   5 -11   0   -0.06    0.33
   7 -11   1    0.07    0.30
 -15   5  23   -0.62    0.37
 -14   5  21    0.33    0.31
 -14   5  22    0.22    0.31
 -13   5  20    3.88    0.30
 -12   5  19    0.27    0.26
 -11   5  18    0.46    0.26
 -10   5  17   -0.23    0.25
  -9   5  17    8.03    0.29
  -8   5  16    0.02    0.27
  -8   5  17   -0.15    0.21
  -7   5  16    6.25    0.28
  -6   5  16    0.63    0.25
  -5   5  16    6.99    0.27
  -4   5  16    0.53    0.22
  -4   5  17    0.14    0.17
  -3   5  17   11.66    0.30
  -2   5  17    0.13    0.25
  -1   5  18    6.39    0.26
   0   5  19    1.06    0.24
   1   5  20   18.14    0.32
   1   5  21    3.33    0.20
   2   5  21    0.22    0.25
   2   5  22    0.33    0.26
   2   5  23    0.15    0.19
   3   5  23    7.68    0.27
   3   5  24    7.53    0.30
   3   5  25    2.39    0.29
   3   5  26    0.95    0.28
   3   5  27    4.32    0.29
   3   5  28    1.55    0.29
   3   5  29    4.67    0.32
   4   5  28   -0.15    0.28
 -18   4  19    7.88    0.37
 -17   4  17    0.28    0.29
 -12   4  12   13.12    0.33
 -10   4  11   59.16    0.49
  -9   4  11    0.24    0.24
  -3   4  11    0.01    0.22
  -2   4  11    9.09    0.28
   0   4  12   12.11    0.29
   1   4  13    0.63    0.17
   4   4  16   16.47    0.26
   5   4  17    0.09    0.24
   6   4  19   13.06    0.31
   7   4  21    0.57    0.25
   7   4  22    0.44    0.24
   8   4  24    0.22    0.25
   8   4  25    1.04    0.27
   8   4  26    2.63    0.30
   8   4  27    0.10    0.30
   8   4  28    3.00    0.33
   8   4  29    2.89    0.34
 -21   3  17    0.58    0.36
 -20   3  15   -0.14    0.33
 -10   3   7    0.23    0.23
  -2   3   7    1.13    0.25
   2   3   9    0.73    0.17
   7   3  14    8.73    0.28
   8   3  15    0.55    0.26
   9   3  17   18.15    0.31
  10   3  20    0.31    0.25
  11   3  23    3.88    0.31
  11   3  24    0.15    0.30
  11   3  25    1.39    0.29
  11   3  26    1.01    0.30
  11   3  27    3.26    0.29
 -21   2  12    0.09    0.38
 -15   2   6    0.04    0.32
 -13   2   5    0.09    0.28
   1   2   5    1.08    0.25
   3   2   6    0.83    0.25
   9   2  12    0.03    0.23
  12   2  18    6.43    0.29
  13   2  21    0.14    0.28
  13   2  22   -0.01    0.28
 -24   1  13    0.00    0.48
 -16   1   4    1.65    0.46
   4   1   4    0.24    0.26
  12   1  13    0.17    0.30
  13   1  15    3.24    0.31
  14   1  18    0.10    0.25
  15   1  21    7.40    0.35
  15   1  22    1.14    0.30
  10   0   7    0.24    0.25
  16   0  19   10.97    0.39
  17   0  24    0.17    0.36
  17   0  25    0.17    0.37
 -10  -1  -2    0.63    0.27
  11  -1   6   26.87    0.87
  17  -1  18    6.19    0.40
  18  -1  22   -0.09    0.40
  18  -1  23    0.05    0.38
 -23  -2   5    0.21    0.49
 -14  -2  -2    8.14    0.35
 -11  -2  -3    0.73    0.28
  16  -2  12   15.83    0.74
 -19  -3   0    0.01    0.33
 -16  -3  -2    0.80    0.29
 -14  -3  -3    0.29    0.25
 -11  -3  -4    8.22    0.29
  -1  -3  -4   25.18    0.39
 -24  -4   4    0.04    0.44
 -20  -4   0   11.58    0.38
 -13  -4  -4    0.10    0.26
  -9  -4  -5    0.65    0.24
  -2  -4  -5   90.00    0.58
   7  -4  -1    0.87    0.28
 -18  -5  -2    0.15    0.29
 -14  -5  -4   -0.03    0.28
 -11  -5  -5   22.34    0.34
   0  -5  -5    0.17    0.17
   9  -5   0    4.37    0.26
  12  -5   3    0.82    0.28
  16  -5   9   -0.07    0.38
  17  -5  11    2.37    0.46
 -22  -6   1   -0.58    0.40
 -21  -6   0   -0.04    0.33
 -12  -6  -5   25.38    0.36
  -7  -6  -6    0.61    0.18
  -6  -6  -6    6.06    0.26
  -5  -6  -6    0.20    0.17
   0  -6  -5   12.96    0.29
   3  -6  -4    0.43    0.23
   5  -6  -3    0.04    0.24
   8  -6  -1    0.18    0.22
   9  -6   0    0.50    0.28
  15  -6   7    0.05    0.33
  18  -6  13    0.06    0.44
 -18  -7  -2    0.17    0.34
 -14  -7  -4    0.51    0.29
 -12  -7  -5   -0.01    0.25
 -11  -7  -5    0.29    0.27
   0  -7  -5   -0.01    0.24
   3  -7  -4   16.98    0.31
   5  -7  -3    3.91    0.25
   8  -7  -1    0.30    0.23
   9  -7   0    1.23    0.24
  10  -7   1    0.26    0.28
  11  -7   2   12.72    0.35
  12  -7   3    0.08    0.28
  15  -7   7    0.38    0.34
 -16  -8  -3    0.39    0.30
 -14  -8  -4    7.66    0.32
 -11  -8  -5    0.55    0.26
 -10  -8  -5    0.30    0.25
  -2  -8  -5    0.46    0.24
  -1  -8  -5    0.30    0.25
   2  -8  -4    5.71    0.27
   4  -8  -3    4.02    0.26
   6  -8  -2    1.74    0.25
 -15  -9  -3    0.07    0.32
 -12  -9  -4    0.46    0.28
  -8  -9  -5   -0.03    0.25
  -7  -9  -5    2.18    0.28
  -6  -9  -5    0.52    0.26
  -5  -9  -5    0.74    0.26
  -4  -9  -5    0.43    0.23
   0  -9  -4    0.15    0.25
   3  -9  -3    4.63    0.28
   5  -9  -2    0.60    0.24
   8  -9   0   -0.21    0.27
   9  -9   1    1.37    0.28
  10  -9   2   -0.04    0.27
  11  -9   3    1.35    0.30
  12  -9   4   -0.06    0.30
  14  -9   7   -0.04    0.38
 -13 -10  -3    0.09    0.29
 -12 -10  -3    0.36    0.31
  -9 -10  -4    0.12    0.30
  -8 -10  -4    0.65    0.30
  -7 -10  -4    0.55    0.27
  -6 -10  -4    0.16    0.28
  -5 -10  -4   -0.27    0.28
  -4 -10  -4    0.89    0.28
  -3 -10  -4    0.37    0.29
   0 -10  -3    2.85    0.25
   1 -10  -3    0.21    0.27
   3 -10  -2    0.19    0.27
   5 -10  -1    0.06    0.26
   8 -10   1    1.39    0.30
   9 -10   2   -0.29    0.30
  10 -10   3    3.96    0.35
  11 -10   4    0.13    0.32
  -8 -11  -3    0.39    0.33
  -7 -11  -3    0.91    0.32
  -6 -11  -3    0.14    0.30
  -5 -11  -3    0.23    0.31
  -4 -11  -3   -0.03    0.30
  -3 -11  -3    3.81    0.29
   0 -11  -2   -0.08    0.30
   3 -11  -1    1.47    0.30
   6 -11   1    0.04    0.32
   7 -11   2    0.83    0.33
  -6   6  27    0.09    0.30
  -5   6  27    0.30    0.29
 -15   5  21    1.79    0.34
 -15   5  22    0.87    0.34
 -14   5  20    0.18    0.30
 -13   5  19    1.69    0.28
 -12   5  18    0.14    0.28
 -11   5  17    2.43    0.28
 -10   5  16    0.22    0.25
  -9   5  16   10.20    0.30
  -7   5  15    7.80    0.27
  -6   5  15    0.68    0.25
  -5   5  15   14.70    0.29
  -3   5  16    2.89    0.26
  -2   5  16    0.11    0.25
  -1   5  17    7.18    0.28
   0   5  18   -0.12    0.23
   1   5  18    6.06    0.26
   1   5  19    0.36    0.24
   2   5  20   -0.21    0.26
   3   5  21    0.39    0.25
   3   5  22    8.02    0.28
   4   5  23   -0.06    0.25
   4   5  24    0.10    0.27
   4   5  25    0.10    0.28
   4   5  26   -0.17    0.27
   4   5  27    0.38    0.27
   4   5  29    0.01    0.29
 -18   4  18    2.65    0.33
 -17   4  16    0.36    0.32
 -16   4  15    0.61    0.28
 -15   4  14    0.16    0.25
 -14   4  13    9.96    0.32
 -13   4  12    0.18    0.28
 -11   4  11    0.52    0.24
  -8   4  10   20.39    0.35
  -7   4  10    0.63    0.25
  -6   4  10    2.90    0.26
  -5   4  10    0.68    0.24
  -4   4  10    2.70    0.25
  -1   4  11    0.46    0.23
   1   4  12    0.76    0.23
   2   4  13   16.99    0.31
   3   4  14    0.25    0.23
   4   4  15   38.53    0.39
   5   4  16    1.02    0.25
   6   4  18    5.14    0.25
   7   4  19    1.09    0.23
   7   4  20    0.29    0.25
   8   4  22    2.05    0.25
   8   4  23    0.08    0.26
   9   4  27    0.11    0.28
   9   4  28   -0.24    0.30
   9   4  29    0.13    0.29
 -19   3  13    4.55    0.37
 -18   3  12    0.23    0.32
 -17   3  11    8.03    0.35
 -16   3  10    0.35    0.29
 -13   3   8   35.79    0.47
 -11   3   7   25.73    0.43
  -6   3   6    0.97    0.28
  -1   3   7   83.80    0.58
   1   3   8    9.46    0.29
   3   3   9   10.95    0.30
   4   3  10    0.75    0.23
   5   3  11   32.51    0.39
   6   3  12    0.40    0.24
   7   3  13   11.27    0.31
   9   3  16    6.66    0.28
  10   3  19    0.20    0.25
  11   3  21    0.04    0.29
  11   3  22    0.96    0.28
  12   3  27    0.08    0.33
  12   3  28    0.23    0.33
 -22   2  13    2.02    0.44
 -11   2   4    0.17    0.25
  -1   2   4    1.50    0.28
   7   2   9    0.58    0.27
  10   2  13    9.36    0.29
  11   2  15    0.16    0.25
  12   2  17    4.88    0.28
  13   2  20    0.28    0.26
  14   2  25    6.76    0.38
  14   2  26    0.12    0.31
  14   2  27    2.70    0.34
 -23   1  11    0.37    0.48
  -8   1   1    0.13    0.35
  -4   1   1    0.57    0.37
  11   1  11    0.99    0.25
  14   1  17    0.08    0.29
  15   1  20    3.64    0.33
  11   0   8    0.04    0.30
  13   0  11   -0.02    0.31
  14   0  13    1.89    0.30
  16   0  18    1.35    0.31
  17   0  22    0.09    0.36
  17   0  23    0.25    0.34
 -13  -1  -1    6.68    0.40
  18  -1  21    0.04    0.41
 -20  -2   2    1.74    0.39
  -1  -2  -3    4.91    0.34
   2  -2  -2  815.13    2.25
 -24  -3   5    0.11    0.45
 -20  -3   1   -0.06    0.33
 -10  -3  -4    0.18    0.23
   2  -3  -3    1.00    0.24
   4  -3  -2    0.40    0.22
 -23  -4   3    0.02    0.39
 -22  -4   2    4.53    0.37
 -21  -4   1   -0.02    0.35
 -17  -4  -2    0.02    0.24
 -15  -4  -3    0.24    0.26
  -8  -4  -5    9.11    0.29
  -7  -4  -5   -0.08    0.24
  -6  -4  -5   17.19    0.33
  -5  -4  -5    2.70    0.25
  -4  -4  -5   50.58    0.46
  -3  -4  -5    1.09    0.17
   1  -4  -4    1.30    0.25
  13  -4   5    0.18    0.32
  15  -4   8    0.01    0.39
 -19  -5  -1    0.15    0.31
 -16  -5  -3    0.23    0.25
 -10  -5  -5    0.14    0.23
  -2  -5  -5    1.17    0.24
  -1  -5  -5   18.50    0.28
   2  -5  -4    0.61    0.23
   4  -5  -3    0.27    0.24
   6  -5  -2    0.89    0.25
 -19  -6  -1   -0.08    0.33
 -18  -6  -2   -0.04    0.28
 -16  -6  -3    3.88    0.29
 -14  -6  -4    0.52    0.26
 -11  -6  -5    0.08    0.24
 -10  -6  -5    1.45    0.23
  -1  -6  -5   -0.22    0.23
   2  -6  -4   11.16    0.28
   6  -6  -2   16.51    0.32
  10  -6   1    2.95    0.26
  11  -6   2    0.60    0.25
  16  -6   9   11.57    0.46
  17  -6  11    0.11    0.39
 -19  -7  -1   -0.10    0.33
 -16  -7  -3    0.02    0.27
 -10  -7  -5    0.96    0.25
  -2  -7  -5    0.53    0.25
  -1  -7  -5   13.35    0.29
   2  -7  -4    0.07    0.24
   4  -7  -3    1.90    0.25
   6  -7  -2    0.21    0.23
  16  -7   9    0.05    0.34
  17  -7  11    6.00    0.43
 -17  -8  -2    0.13    0.32
 -15  -8  -3    0.28    0.29
 -13  -8  -4    0.35    0.25
 -12  -8  -4    1.15    0.25
  -9  -8  -5    0.21    0.24
  -8  -8  -5    5.23    0.27
  -7  -8  -5    0.92    0.25
  -6  -8  -5   12.38    0.30
  -5  -8  -5    0.95    0.26
  -4  -8  -5    6.80    0.27
  -3  -8  -5    1.19    0.24
   1  -8  -4   -0.22    0.24
   3  -8  -3    0.78    0.23
   5  -8  -2    0.11    0.24
   7  -8  -1   -0.08    0.25
   8  -8   0    0.03    0.25
  13  -8   5    0.25    0.30
  15  -8   8    0.27    0.34
 -16  -9  -2    0.43    0.32
 -14  -9  -3   -0.22    0.27
 -13  -9  -3    4.14    0.29
 -11  -9  -4    0.90    0.25
 -10  -9  -4   -0.20    0.28
  -2  -9  -4    0.27    0.26
  -1  -9  -4    0.85    0.26
   2  -9  -3   -0.23    0.25
   4  -9  -2    0.48    0.26
   6  -9  -1    0.20    0.24
   7  -9   0    0.13    0.25
  13  -9   6    2.05    0.36
 -11 -10  -3    0.60    0.29
 -10 -10  -3    3.74    0.29
  -2 -10  -3    1.51    0.26
  -1 -10  -3   -0.18    0.27
   2 -10  -2    0.47    0.28
   4 -10  -1    0.83    0.28
   6 -10   0   -0.22    0.28
   7 -10   1    0.03    0.29
  12 -10   6    0.21    0.36
  -3 -11  -2    0.51    0.27
  -2 -11  -2   -0.30    0.31
  -1 -11  -2    0.57    0.27
   1 -11  -1    0.65    0.30
   2 -11  -1    0.37    0.27
   4 -11   0    0.27    0.27
   5 -11   1    0.57    0.33
   8 -11   3   -0.09    0.33
  -9   6  25    0.00    0.30
  -8   6  24    3.39    0.30
  -8   6  25    0.64    0.30
  -8   6  26   -0.27    0.31
  -7   6  23   -0.21    0.26
  -7   6  24    0.27    0.30
  -7   6  25    0.12    0.30
  -7   6  26   -0.06    0.28
  -6   6  23    0.29    0.26
  -6   6  24    0.90    0.31
  -6   6  25    0.33    0.30
  -6   6  26   -1.04    0.32
  -5   6  23   -0.13    0.26
  -5   6  24    0.28    0.28
  -5   6  25   -0.32    0.30
  -5   6  26   -0.01    0.28
  -4   6  24    6.84    0.33
  -4   6  25    0.02    0.31
  -4   6  26    0.20    0.35
  -4   6  27   -0.54    0.30
  -3   6  24   -0.10    0.26
  -3   6  25   -0.25    0.30
  -3   6  26   -0.43    0.30
  -3   6  27   -0.20    0.30
  -3   6  28    0.14    0.31
  -2   6  26    2.40    0.29
  -2   6  27    1.50    0.32
  -2   6  28    0.10    0.31
 -15   5  20    1.29    0.32
 -14   5  19    0.15    0.28
 -13   5  18    5.70    0.29
 -12   5  17   -0.11    0.28
 -11   5  16    2.33    0.27
 -10   5  15    0.19    0.27
  -9   5  15    6.67    0.27
  -8   5  15    0.08    0.24
  -4   5  15    0.64    0.22
  -3   5  15    2.96    0.25
  -2   5  15    0.97    0.24
  -1   5  16    8.12    0.28
   0   5  17    0.03    0.17
   1   5  17    7.72    0.28
   2   5  18    0.33    0.23
   2   5  19    0.64    0.23
   3   5  20   12.84    0.30
   4   5  21    0.06    0.24
   4   5  22    0.34    0.25
   5   5  24    7.68    0.30
   5   5  25    4.24    0.30
   5   5  26    0.36    0.28
   5   5  27    2.18    0.28
   5   5  28    0.19    0.28
   5   5  29    0.34    0.30
 -19   4  19   -0.13    0.34
 -18   4  17    0.93    0.32
 -17   4  15    0.13    0.30
 -16   4  14    7.41    0.37
 -15   4  13   -0.02    0.29
 -12   4  11   21.83    0.37
 -10   4  10   25.17    0.40
  -9   4  10    0.63    0.24
  -3   4  10    0.24    0.22
  -2   4  10    0.61    0.24
   0   4  11   61.33    0.47
   2   4  12   19.77    0.32
   3   4  13   -0.14    0.23
   4   4  14    4.47    0.25
   5   4  15    1.62    0.24
   6   4  17   12.43    0.29
   7   4  18   -0.09    0.25
   8   4  20    1.30    0.23
   8   4  21    0.86    0.25
   9   4  23    0.01    0.29
   9   4  24    0.16    0.27
   9   4  25   -0.06    0.29
   9   4  26    0.28    0.26
 -21   3  16    0.46    0.35
 -20   3  14   -0.24    0.33
 -15   3   9    7.43    0.33
  -8   3   6    1.53    0.25
  -7   3   6    9.56    0.31
  -5   3   6  166.47    0.83
  -4   3   6    1.80    0.25
   0   3   7    0.03    0.24
   2   3   8    0.38    0.24
   8   3  14    0.13    0.23
  10   3  18   -0.02    0.23
  11   3  20    8.63    0.30
  12   3  24    0.18    0.29
  12   3  25   -0.37    0.29
  12   3  26   -0.01    0.30
 -20   2  10    0.66    0.36
 -19   2   9    0.23    0.33
 -18   2   8    5.84    0.41
  -6   2   3   18.12    0.43
   2   2   5    8.66    0.31
   5   2   7    0.43    0.23
   6   2   8   32.81    0.43
   8   2  10    5.46    0.28
   9   2  11    0.06    0.27
  13   2  19   -0.03    0.25
  14   2  23    3.86    0.31
  14   2  24    1.28    0.30
   7   1   6   92.31    0.78
   8   1   7    0.17    0.22
   9   1   8   43.49    0.55
  13   1  14   10.87    0.37
  15   1  19    0.58    0.30
  16   1  24    0.04    0.35
  16   1  25    0.13    0.31
  15   0  15   -0.14    0.29
  17   0  21   -0.06    0.36
 -15  -1   0   18.02    0.56
  -9  -1  -2   22.30    0.51
  -2  -1  -2    0.23    0.26
  15  -1  12    5.26    0.42
  16  -1  14   -0.03    0.36
  17  -1  17    0.42    0.34
 -22  -2   4    1.07    0.42
 -21  -2   3    0.03    0.39
 -17  -2   0    0.27    0.32
 -10  -2  -3   15.32    0.36
   7  -2   1    0.13    0.31
  18  -2  17    0.44    0.41
  19  -2  21   -0.01    0.45
 -23  -3   4    1.70    0.42
 -22  -3   3    0.19    0.38
 -21  -3   2    1.61    0.37
 -17  -3  -1   15.77    0.41
 -13  -3  -3    5.27    0.28
  -9  -3  -4   25.19    0.38
  -2  -3  -4    0.91    0.25
  13  -3   6    0.79    0.44
  19  -3  18    4.38    0.69
 -18  -4  -1    5.08    0.34
 -12  -4  -4   15.55    0.32
   0  -4  -4   14.66    0.32
   3  -4  -3    0.77    0.25
   5  -4  -2    0.81    0.25
  12  -4   4   15.53    0.45
 -21  -5   1    1.49    0.33
 -20  -5   0   -0.19    0.31
 -17  -5  -2    3.31    0.30
 -15  -5  -3    8.63    0.33
 -13  -5  -4    3.97    0.25
  -9  -5  -5   34.35    0.39
  -8  -5  -5    0.35    0.25
  -4  -5  -5    0.97    0.24
  -3  -5  -5   52.94    0.44
   1  -5  -4    0.99    0.24
   7  -5  -1   24.67    0.37
  14  -5   6    0.21    0.28
 -20  -6   0    0.82    0.34
 -17  -6  -2    0.25    0.29
 -13  -6  -4    0.33    0.25
  -9  -6  -5    1.16    0.25
  -8  -6  -5   32.16    0.36
  -3  -6  -5    1.00    0.24
  -2  -6  -5   11.49    0.29
   1  -6  -4    0.46    0.21
   4  -6  -3    4.79    0.27
   7  -6  -1    0.17    0.26
  14  -6   6    1.24    0.30
 -20  -7   0   -0.27    0.34
 -17  -7  -2    2.34    0.29
 -15  -7  -3    3.60    0.29
 -13  -7  -4    0.31    0.23
 -12  -7  -4    0.76    0.27
  -9  -7  -5    5.57    0.25
  -8  -7  -5    0.23    0.25
  -7  -7  -5   13.39    0.31
  -6  -7  -5    0.46    0.26
  -5  -7  -5    0.80    0.25
  -4  -7  -5    0.00    0.25
  -3  -7  -5    3.60    0.26
   1  -7  -4   10.85    0.28
   7  -7  -1    2.76    0.25
 -19  -8   0   -0.32    0.34
 -18  -8  -1    0.46    0.32
 -16  -8  -2    1.19    0.30
 -14  -8  -3    3.28    0.31
 -11  -8  -4    0.01    0.25
  -1  -8  -4   -0.12    0.24
   0  -8  -4    8.79    0.27
   2  -8  -3    1.88    0.23
   6  -8  -1    0.15    0.24
   9  -8   1    0.17    0.26
  10  -8   2    6.54    0.29
  11  -8   3   -0.01    0.27
  12  -8   4    1.48    0.28
  16  -8  10    0.45    0.35
 -15  -9  -2    0.31    0.32
 -12  -9  -3    0.12    0.27
  -9  -9  -4    1.61    0.20
  -8  -9  -4   -0.03    0.27
  -7  -9  -4    1.86    0.26
  -6  -9  -4    0.73    0.27
  -5  -9  -4    3.59    0.28
  -4  -9  -4    0.41    0.26
  -3  -9  -4   11.79    0.29
   0  -9  -3    0.19    0.23
   1  -9  -3    7.52    0.28
   3  -9  -2    5.37    0.28
   5  -9  -1    0.54    0.24
   8  -9   1    0.00    0.27
   9  -9   2    0.16    0.27
  10  -9   3    0.01    0.30
  11  -9   4    0.97    0.33
  12  -9   5    0.21    0.29
  14  -9   8   -0.06    0.36
 -13 -10  -2    0.04    0.28
 -12 -10  -2    1.27    0.31
  -9 -10  -3    0.20    0.29
  -8 -10  -3    0.41    0.30
  -7 -10  -3   -0.27    0.28
  -6 -10  -3    3.39    0.29
  -5 -10  -3    0.02    0.28
  -4 -10  -3    1.83    0.27
  -3 -10  -3    0.35    0.28
   0 -10  -2    0.30    0.25
   1 -10  -2    0.15    0.26
   3 -10  -1    0.06    0.27
   5 -10   0    0.26    0.27
   8 -10   2    0.41    0.28
   9 -10   3    0.30    0.30
  10 -10   4    3.71    0.34
  11 -10   5    0.05    0.32
  -8 -11  -2   -0.08    0.29
  -7 -11  -2    0.87    0.31
  -6 -11  -2    0.22    0.30
  -5 -11  -2    1.03    0.30
  -4 -11  -2   -0.37    0.28
  -1 -11  -1    0.34    0.27
   0 -11  -1    0.34    0.30
   2 -11   0    0.28    0.26
   3 -11   0    0.44    0.27
   4 -11   1   -0.07    0.28
   6 -11   2   -0.19    0.32
   7 -11   3    0.38    0.28
 -11   6  24   -0.02    0.29
 -10   6  23    0.28    0.31
 -10   6  24    1.35    0.32
 -10   6  25    0.04    0.29
  -9   6  22    0.33    0.26
  -9   6  23   -0.08    0.28
  -9   6  24    0.20    0.26
  -8   6  22    5.68    0.29
  -8   6  23    0.08    0.25
  -7   6  21    0.10    0.25
  -7   6  22    0.22    0.28
  -6   6  21    1.93    0.27
  -6   6  22    1.65    0.28
  -5   6  21    0.32    0.24
  -5   6  22    0.39    0.27
  -4   6  22    2.54    0.27
  -4   6  23   -0.23    0.25
  -3   6  22    0.31    0.27
  -3   6  23   -0.01    0.28
  -2   6  23    3.67    0.30
  -2   6  24    0.74    0.28
  -2   6  25    1.00    0.21
  -1   6  24   -0.03    0.28
  -1   6  25    0.38    0.29
  -1   6  26   -0.02    0.29
  -1   6  27   -0.18    0.27
  -1   6  28    0.35    0.23
   0   6  25    0.69    0.27
   0   6  26    8.06    0.32
   0   6  27    0.16    0.30
   0   6  28   -0.12    0.31
 -16   5  20    0.06    0.33
 -16   5  21   -0.26    0.33
 -15   5  19    0.96    0.31
 -14   5  18    0.16    0.27
 -13   5  17    1.42    0.28
 -12   5  16    0.34    0.26
 -11   5  15    1.26    0.27
  -9   5  14    4.17    0.25
  -8   5  14    0.01    0.23
  -7   5  14    2.04    0.24
  -6   5  14    0.79    0.23
  -5   5  14   15.66    0.31
  -4   5  14    0.74    0.24
  -3   5  14    1.54    0.24
  -1   5  15   23.53    0.34
   0   5  16    0.65    0.18
   1   5  16    8.83    0.27
   2   5  17    0.60    0.24
   3   5  18    2.78    0.23
   3   5  19    4.60    0.25
   4   5  20    0.11    0.24
   5   5  22    1.96    0.27
   5   5  23    1.80    0.25
   6   5  24    0.94    0.26
   6   5  25    0.90    0.28
   6   5  26    0.33    0.30
   6   5  27    0.06    0.30
   6   5  28   -0.27    0.28
 -19   4  18    0.49    0.33
 -18   4  16    6.18    0.38
 -14   4  12    0.31    0.25
 -13   4  11   -0.11    0.31
 -11   4  10    0.76    0.28
  -7   4   9    0.38    0.25
  -6   4   9   13.31    0.31
  -5   4   9    0.54    0.24
  -4   4   9    2.68    0.23
  -1   4  10    0.49    0.23
   1   4  11    0.13    0.23
   6   4  16   52.80    0.44
   7   4  17    0.02    0.24
   8   4  19   26.74    0.36
   9   4  22    0.25    0.25
  10   4  25    2.22    0.32
  10   4  26    2.16    0.32
  10   4  27    1.75    0.33
  10   4  28    1.47    0.33
 -21   3  15    1.86    0.43
 -14   3   8    0.08    0.28
 -12   3   7    0.46    0.25
  -9   3   6   27.23    0.41
  -3   3   6    5.53    0.28
   4   3   9    0.78    0.23
   5   3  10   20.77    0.34
   6   3  11    0.19    0.23
   7   3  12    5.59    0.28
   9   3  15    2.39    0.24
  10   3  17    0.11    0.23
  11   3  19    5.96    0.28
  12   3  22   -0.13    0.27
  12   3  23   -0.11    0.27
 -23   2  14    0.13    0.43
 -21   2  11    0.08    0.36
 -17   2   7    0.09    0.31
 -14   2   5    0.92    0.32
 -12   2   4    1.11    0.32
  -8   2   3    2.83    0.30
  -7   2   3    0.48    0.22
  -5   2   3    0.83    0.23
  -4   2   3  279.63    1.32
   0   2   4    6.89    0.32
   4   2   6    7.31    0.28
  10   2  12    1.34    0.28
  11   2  14    0.06    0.25
  12   2  16    1.47    0.26
  13   2  18    0.18    0.29
  14   2  21    1.94    0.33
  14   2  22    2.40    0.30
 -21   1   8   11.94    0.71
 -20   1   7    0.17    0.48
 -19   1   6    1.86    0.55
  -3   1   1   32.91    0.74
   6   1   5    0.71    0.28
  10   1   9    0.25    0.27
  12   1  12    0.26    0.25
  14   1  16    0.09    0.25
  16   1  22    0.04    0.33
  16   1  23    0.02    0.31
   6   0   3   71.68    1.12
  16   0  17    0.52    0.31
 -18  -1   2   -0.03    0.39
  14  -1  10    0.08    0.34
  18  -1  20    0.18    0.40
 -15  -2  -1    1.46    0.33
 -13  -2  -2    0.26    0.27
  -9  -2  -3    0.21    0.29
  -2  -2  -3  739.51    1.99
  17  -2  14    0.28    0.45
 -15  -3  -2   20.87    0.39
  -8  -3  -4    1.38    0.25
  -7  -3  -4  125.43    0.74
  -5  -3  -4    7.94    0.28
  -4  -3  -4    0.59    0.24
  -3  -3  -4   51.08    0.47
   1  -3  -3  148.20    0.81
 -19  -4   0    0.06    0.30
 -16  -4  -2    6.03    0.28
 -14  -4  -3   17.00    0.35
 -11  -4  -4    0.29    0.24
  -1  -4  -4    1.45    0.24
  11  -4   3    0.69    0.27
  16  -4  10    6.76    0.57
  17  -4  12    0.22    0.55
 -23  -5   3    1.68    0.36
 -22  -5   2    0.02    0.33
 -18  -5  -1    0.15    0.31
 -12  -5  -4   -0.06    0.23
  -7  -5  -5   27.65    0.32
  -6  -5  -5    1.04    0.23
  -5  -5  -5    0.82    0.22
   0  -5  -4    0.51    0.22
   3  -5  -3    6.35    0.27
   5  -5  -2   10.64    0.30
   8  -5   0    0.85    0.27
  13  -5   5    3.94    0.34
 -22  -6   2    2.00    0.38
 -21  -6   1   -0.07    0.33
 -18  -6  -1    0.14    0.33
 -15  -6  -3    0.57    0.26
 -12  -6  -4    5.67    0.27
  -7  -6  -5    0.25    0.24
  -6  -6  -5    0.91    0.24
  -5  -6  -5    0.22    0.24
  -4  -6  -5    6.80    0.22
   3  -6  -3    0.12    0.24
   5  -6  -2    0.70    0.24
   8  -6   0    2.47    0.28
  13  -6   5    0.48    0.28
 -18  -7  -1    0.10    0.30
 -16  -7  -2    0.23    0.28
 -14  -7  -3    0.74    0.27
 -11  -7  -4   15.09    0.31
   0  -7  -4   -0.02    0.24
   3  -7  -3   12.35    0.29
   5  -7  -2   17.62    0.31
   8  -7   0    0.10    0.23
   9  -7   1    0.78    0.25
  10  -7   2   -0.05    0.28
  11  -7   3    5.18    0.32
  12  -7   4    0.35    0.30
  15  -7   8    1.39    0.36
 -17  -8  -1    0.23    0.30
 -15  -8  -2    0.14    0.31
 -13  -8  -3    0.58    0.27
 -10  -8  -4    0.86    0.24
  -9  -8  -4   -0.13    0.25
  -8  -8  -4    4.15    0.24
  -3  -8  -4    0.58    0.24
  -2  -8  -4    5.89    0.27
   1  -8  -3    0.28    0.22
   4  -8  -2    1.62    0.25
   7  -8   0    0.10    0.24
  13  -8   6    0.74    0.31
  15  -8   9   -0.06    0.32
 -16  -9  -1    0.53    0.31
 -14  -9  -2    0.34    0.29
 -11  -9  -3    1.13    0.28
 -10  -9  -3    0.07    0.28
  -1  -9  -3    8.62    0.30
   2  -9  -2   -0.07    0.26
   4  -9  -1    0.01    0.26
   6  -9   0   -0.16    0.23
  13  -9   7    1.80    0.37
 -13 -10  -1    0.04    0.33
 -11 -10  -2   -0.10    0.29
 -10 -10  -2    0.47    0.31
  -2 -10  -2    0.22    0.26
  -1 -10  -2    0.09    0.26
   2 -10  -1    0.12    0.27
   4 -10   0    0.50    0.27
   6 -10   1    0.28    0.28
   7 -10   2    0.01    0.29
  -8 -11  -1    0.31    0.29
  -4 -11  -1    0.31    0.28
  -3 -11  -1    0.23    0.29
  -2 -11  -1   -0.25    0.29
   1 -11   0    0.12    0.31
   3 -11   1   -0.26    0.27
   5 -11   2    0.17    0.33
   8 -11   4   -0.11    0.33
 -12   6  23    3.10    0.30
 -12   6  24    0.08    0.31
 -11   6  22   -0.05    0.31
 -11   6  23    0.40    0.32
 -10   6  21    0.49    0.30
 -10   6  22    2.96    0.31
  -9   6  20    0.14    0.28
  -9   6  21   -0.07    0.26
  -8   6  20    0.00    0.26
  -8   6  21    1.15    0.25
  -7   6  20    0.08    0.27
  -6   6  20    1.24    0.27
  -5   6  20    0.33    0.26
  -4   6  20    3.28    0.25
  -4   6  21    1.12    0.19
  -3   6  20   -0.02    0.24
  -3   6  21    0.06    0.27
  -2   6  21    0.04    0.26
  -2   6  22    5.57    0.26
  -1   6  22    0.73    0.27
  -1   6  23    0.26    0.25
   0   6  23    1.34    0.27
   0   6  24    7.48    0.31
   1   6  24    0.65    0.25
   1   6  25    0.13    0.29
   1   6  26   -0.32    0.29
   1   6  27   -0.09    0.28
   1   6  28    0.40    0.28
   2   6  27    0.75    0.29
   2   6  28    0.31    0.32
 -16   5  19    0.44    0.31
 -15   5  18    2.06    0.31
 -14   5  17    0.20    0.26
 -13   5  16    3.65    0.30
 -12   5  15    0.28    0.27
 -10   5  14    0.13    0.22
  -8   5  13    0.32    0.22
  -7   5  13    2.29    0.25
  -6   5  13    0.38    0.24
  -5   5  13   20.58    0.32
  -4   5  13    0.50    0.23
  -2   5  14    1.54    0.24
  -1   5  14   70.58    0.48
   0   5  15    0.58    0.24
   2   5  16   -0.17    0.24
   3   5  17   11.63    0.29
   4   5  19    0.34    0.24
   5   5  20    4.65    0.26
   5   5  21    6.35    0.28
   6   5  22    0.29    0.27
   6   5  23    0.17    0.27
   7   5  25    8.44    0.30
   7   5  26    1.26    0.30
   7   5  27    0.21    0.29
   7   5  28    0.26    0.32
 -19   4  17    0.36    0.31
 -17   4  14    0.29    0.33
 -16   4  13   -0.11    0.29
 -15   4  12    0.56    0.30
 -12   4  10    0.42    0.29
  -9   4   9   -0.01    0.23
  -8   4   9    5.98    0.28
  -3   4   9    0.12    0.23
   0   4  10    2.32    0.24
   2   4  11    8.79    0.27
   3   4  12    0.07    0.23
   4   4  13    2.80    0.18
   5   4  14    0.30    0.23
   6   4  15   30.54    0.36
   7   4  16    0.69    0.23
   8   4  18    1.71    0.25
   9   4  20   -0.14    0.25
   9   4  21   -0.13    0.22
  10   4  23    2.93    0.30
  10   4  24    5.57    0.32
 -19   3  12    3.31    0.36
 -18   3  11    0.07    0.28
 -17   3  10    2.48    0.31
 -16   3   9    0.16    0.29
 -13   3   7   16.58    0.41
 -10   3   6    0.49    0.23
  -2   3   6    0.10    0.17
   1   3   7   84.13    0.58
   3   3   8   20.75    0.35
   8   3  13    0.17    0.24
   9   3  14    0.84    0.25
  10   3  16    0.39    0.22
  11   3  18    9.47    0.29
  12   3  21    0.50    0.26
  13   3  25    1.06    0.32
  13   3  26    4.48    0.34
  13   3  27    0.07    0.33
 -16   2   6    0.66    0.33
  -3   2   3    4.25    0.31
  12   2  15    0.86    0.29
  13   2  17    0.23    0.29
  14   2  20    3.77    0.32
  15   2  24   -0.04    0.34
  15   2  25    0.17    0.33
  15   2  26   -0.16    0.33
 -24   1  12    0.29    0.58
  -9   1   1   54.04    1.09
   3   1   3   91.11    0.91
  11   1  10   17.27    0.41
  15   1  18    2.70    0.28
  16   1  21   -0.17    0.34
  12   0   9    0.16    0.28
  14   0  12    3.44    0.33
  15   0  14    0.21    0.30
  17   0  20    0.19    0.33
  -8  -1  -2    0.37    0.28
  -3  -1  -2  149.56    1.20
  12  -1   7    0.12    0.43
  17  -1  16    6.95    0.43
 -25  -2   8   -0.01    0.57
  -8  -2  -3    2.55    0.29
  -3  -2  -3    4.52    0.31
  19  -2  20   -0.02    0.44
 -18  -3   0    0.02    0.29
 -12  -3  -3    0.17    0.24
  -6  -3  -4    1.02    0.24
   3  -3  -2    7.36    0.29
   5  -3  -1   68.62    0.63
 -24  -4   5    2.83    0.46
 -20  -4   1    3.61    0.33
 -13  -4  -3    0.15    0.28
 -10  -4  -4   18.55    0.34
  -2  -4  -4   45.33    0.45
   2  -4  -3   20.82    0.35
   4  -4  -2  100.88    0.66
   6  -4  -1   31.62    0.43
 -19  -5   0    0.14    0.31
 -16  -5  -2    0.26    0.26
 -14  -5  -3    0.32    0.23
 -11  -5  -4    2.41    0.24
  -1  -5  -4    0.90    0.23
   9  -5   1   31.40    0.45
  12  -5   4    0.16    0.27
  15  -5   8    9.64    0.42
 -19  -6   0   -0.16    0.33
 -16  -6  -2    3.20    0.29
 -14  -6  -3    2.19    0.27
 -11  -6  -4    1.33    0.24
  -1  -6  -4    0.55    0.23
   0  -6  -4   -0.17    0.16
   9  -6   1    0.94    0.25
  10  -6   2    6.08    0.32
  15  -6   8    0.17    0.34
  18  -6  14    0.50    0.48
 -20  -7   1    0.02    0.37
 -19  -7   0    1.46    0.32
 -17  -7  -1   -0.02    0.31
 -13  -7  -3    1.42    0.25
 -10  -7  -4    1.27    0.25
  -9  -7  -4    4.25    0.27
  -2  -7  -4   -0.20    0.25
  -1  -7  -4   10.76    0.28
   2  -7  -3    0.30    0.23
   4  -7  -2    2.09    0.25
   6  -7  -1   -0.06    0.23
  16  -7  10   -0.14    0.36
  17  -7  12    2.61    0.44
 -18  -8   0    0.14    0.32
 -16  -8  -1    1.02    0.32
 -14  -8  -2    4.06    0.31
 -12  -8  -3    1.02    0.27
 -11  -8  -3   -0.23    0.28
  -7  -8  -4    0.32    0.23
  -6  -8  -4    4.31    0.27
  -5  -8  -4    0.79    0.26
  -4  -8  -4   16.33    0.26
   0  -8  -3    1.46    0.24
   3  -8  -2    0.47    0.24
   5  -8  -1    0.27    0.23
   8  -8   1    3.89    0.27
   9  -8   2   -0.06    0.30
  10  -8   3    3.74    0.32
  11  -8   4    0.13    0.30
  12  -8   5    1.87    0.33
  16  -8  11    4.24    0.42
 -15  -9  -1    2.10    0.33
 -13  -9  -2    1.44    0.27
 -12  -9  -2    0.65    0.27
  -9  -9  -3    1.03    0.26
  -8  -9  -3    0.67    0.26
  -7  -9  -3    1.86    0.26
  -6  -9  -3    0.47    0.25
  -5  -9  -3    0.33    0.26
  -4  -9  -3    0.27    0.25
  -3  -9  -3    4.62    0.28
  -2  -9  -3    0.03    0.19
   1  -9  -2    3.26    0.26
   3  -9  -1    2.68    0.25
   5  -9   0   -0.09    0.24
   7  -9   1    2.49    0.27
   8  -9   2    0.23    0.27
   9  -9   3    1.30    0.29
  10  -9   4    0.12    0.31
  11  -9   5    2.01    0.34
  12  -9   6    0.40    0.30
  14  -9   9    0.47    0.37
 -12 -10  -1    0.28    0.30
  -9 -10  -2    0.19    0.27
  -8 -10  -2    0.23    0.30
  -7 -10  -2    0.09    0.28
  -6 -10  -2    0.51    0.28
  -5 -10  -2   -0.10    0.28
  -4 -10  -2    0.75    0.27
  -3 -10  -2    0.32    0.28
   1 -10  -1   -0.17    0.26
   3 -10   0   -0.08    0.27
   5 -10   1    0.08    0.28
   8 -10   3    0.09    0.29
   9 -10   4   -0.09    0.32
  10 -10   5    1.26    0.32
  11 -10   6   -0.23    0.32
  -6 -11  -1    0.06    0.27
  -5 -11  -1    0.24    0.27
  -1 -11   0    0.99    0.30
   0 -11   0   -0.18    0.30
   2 -11   1   -0.26    0.29
   4 -11   2   -0.13    0.30
   6 -11   3    0.13    0.31
   7 -11   4    1.70    0.32
 -13   6  23    0.16    0.33
 -12   6  21    2.41    0.32
 -12   6  22    0.48    0.32
 -11   6  20   -0.21    0.31
 -11   6  21    0.13    0.30
 -10   6  20    0.08    0.28
  -9   6  19    0.04    0.27
  -8   6  19    0.06    0.26
  -7   6  19    0.31    0.27
  -6   6  18   -0.04    0.23
  -6   6  19    1.43    0.25
  -5   6  18    0.25    0.23
  -5   6  19   -0.15    0.25
  -4   6  19    3.33    0.27
  -3   6  19   -0.31    0.26
  -2   6  19    4.97    0.26
  -2   6  20    1.50    0.26
  -1   6  20    0.28    0.25
  -1   6  21    0.40    0.24
   0   6  21    5.84    0.29
   0   6  22    2.88    0.25
   1   6  22    0.84    0.28
   1   6  23   -0.13    0.29
   2   6  24    0.69    0.27
   2   6  25    0.55    0.29
   2   6  26    1.60    0.28
   3   6  26    0.30    0.28
   3   6  27    0.00    0.31
   3   6  28    0.30    0.33
 -17   5  19    0.74    0.36
 -17   5  20    5.51    0.36
 -16   5  18   -0.05    0.29
 -15   5  17    0.35    0.30
 -14   5  16   -0.03    0.28
 -13   5  15    6.49    0.30
 -12   5  14    0.06    0.29
 -11   5  14    0.17    0.25
 -10   5  13    0.17    0.22
  -9   5  13   34.17    0.38
  -3   5  13    3.54    0.24
  -2   5  13    0.26    0.24
   0   5  14   -0.03    0.24
   1   5  15   22.01    0.29
   3   5  16    3.29    0.24
   4   5  18   -0.13    0.18
   5   5  19    4.27    0.27
   6   5  21    0.22    0.26
   7   5  23    6.37    0.30
   7   5  24    6.81    0.30
   8   5  27    0.34    0.27
   8   5  28   -0.14    0.32
 -20   4  18    2.68    0.35
 -19   4  16    0.16    0.36
 -18   4  15    5.57    0.32
 -14   4  11    3.16    0.27
 -10   4   9   22.46    0.36
  -2   4   9   14.67    0.26
  -1   4   9    0.75    0.24
   1   4  10    0.41    0.23
   4   4  12    8.11    0.27
   5   4  13   -0.08    0.23
   6   4  14    2.61    0.25
   8   4  17   -0.06    0.24
   9   4  19    0.42    0.24
  10   4  21    0.90    0.28
  10   4  22    2.14    0.27
  11   4  25    0.09    0.31
  11   4  26    0.24    0.30
  11   4  27    0.31    0.31
 -22   3  16    0.19    0.40
 -21   3  14    2.36    0.40
 -20   3  13   -0.06    0.34
 -15   3   8   12.56    0.38
 -11   3   6    1.30    0.29
  -1   3   6   65.21    0.53
   6   3  10    0.40    0.24
   7   3  11    2.69    0.25
  10   3  15    0.36    0.25
  11   3  17    7.98    0.28
  12   3  20    0.28    0.28
  13   3  23    3.29    0.29
  13   3  24    1.11    0.31
 -22   2  12    1.82    0.41
  -9   2   3    0.20    0.26
   1   2   4    1.54    0.28
   3   2   5    0.68    0.23
   6   2   7  122.59    0.76
   7   2   8    0.45    0.23
   8   2   9    9.42    0.30
   9   2  10    0.49    0.28
  11   2  13    0.64    0.24
  14   2  19    3.86    0.33
  15   2  23    0.20    0.33
 -22   1   9    0.13    0.57
   5   1   4   32.95    0.56
  13   1  13   24.48    0.41
  14   1  15    0.13    0.24
  15   1  17   13.03    0.38
  16   1  20    0.11    0.30
 -11   0   0    0.00    0.41
  16   0  16    0.38    0.32
  17   0  19    0.17    0.35
  18   0  23    1.80    0.40
 -12  -1  -1    0.19    0.29
  -7  -1  -2   15.16    0.44
  -4  -1  -2    0.29    0.36
  18  -1  19    0.11    0.38
 -18  -2   1    2.74    0.34
 -12  -2  -2   33.29    0.50
  -7  -2  -3    0.59    0.23
  -6  -2  -3   18.23    0.38
  -5  -2  -3    0.47    0.23
  -4  -2  -3  280.52    1.22
   1  -2  -2    4.64    0.35
 -19  -3   1    4.46    0.36
 -16  -3  -1    0.77    0.29
 -14  -3  -2    0.30    0.30
 -11  -3  -3    4.84    0.27
   0  -3  -3    2.31    0.26
   9  -3   2   19.83    0.47
  12  -3   5    0.17    0.34
 -23  -4   4    0.00    0.39
 -22  -4   3    1.07    0.35
 -21  -4   2   -0.05    0.35
 -17  -4  -1    0.50    0.25
 -15  -4  -2    1.29    0.27
  -9  -4  -4    0.36    0.24
  -8  -4  -4   20.80    0.35
  -3  -4  -4    1.46    0.25
  14  -4   7    3.05    0.38
 -20  -5   1    0.01    0.31
 -13  -5  -3   14.54    0.32
 -10  -5  -4    0.33    0.23
  -9  -5  -4   13.19    0.31
  -2  -5  -4    0.71    0.23
   2  -5  -3    1.93    0.24
   4  -5  -2    0.61    0.24
   6  -5  -1    0.82    0.24
  18  -5  14    0.30    0.52
  19  -5  17    3.31    0.72
 -20  -6   1    0.51    0.34
 -17  -6  -1    0.10    0.29
 -13  -6  -3    0.27    0.23
 -10  -6  -4   26.76    0.34
  -9  -6  -4    2.01    0.25
  -2  -6  -4   11.27    0.28
   2  -6  -3    1.14    0.23
   4  -6  -2    1.96    0.24
   6  -6  -1    3.33    0.25
  11  -6   3    0.38    0.24
  16  -6  10    0.34    0.37
  17  -6  12    0.15    0.40
 -18  -7   0    0.01    0.31
 -15  -7  -2    1.46    0.28
 -12  -7  -3    0.47    0.25
  -8  -7  -4    0.22    0.25
  -7  -7  -4    5.53    0.27
  -6  -7  -4    0.13    0.24
  -5  -7  -4   18.87    0.33
  -4  -7  -4    0.87    0.25
  -3  -7  -4   16.60    0.32
   1  -7  -3    1.17    0.24
   7  -7   0   -0.10    0.22
 -19  -8   1   -0.09    0.34
 -17  -8   0    0.14    0.32
 -13  -8  -2    0.32    0.25
 -10  -8  -3    4.14    0.27
  -2  -8  -3    1.99    0.23
  -1  -8  -3    0.34    0.24
   2  -8  -2    1.49    0.25
   4  -8  -1    0.53    0.25
   6  -8   0    0.92    0.24
 -16  -9   0    0.41    0.31
 -14  -9  -1    0.22    0.29
 -11  -9  -2    1.31    0.27
 -10  -9  -2   -0.17    0.25
  -1  -9  -2    3.82    0.27
   0  -9  -2   -0.26    0.25
   2  -9  -1    0.10    0.24
   6  -9   1   -0.01    0.24
  13  -9   8    5.93    0.40
 -13 -10   0   -0.03    0.29
 -11 -10  -1    0.09    0.30
 -10 -10  -1    0.89    0.31
  -1 -10  -1    0.18    0.26
   0 -10  -1   -0.18    0.24
   2 -10   0    0.11    0.28
   4 -10   1    1.75    0.28
   6 -10   2    0.32    0.28
   7 -10   3    0.41    0.29
  11 -10   7   -0.36    0.37
  -8 -11   0    0.55    0.31
  -6 -11   0    0.70    0.28
  -5 -11   0    0.10    0.27
  -4 -11   0    0.00    0.31
  -3 -11   0    0.82    0.30
  -2 -11   0    0.59    0.29
   1 -11   1    0.18    0.30
   3 -11   2    0.16    0.30
   5 -11   3    0.09    0.32
   6 -11   4    0.39    0.32
 -14   6  22    0.39    0.34
 -13   6  21   -0.13    0.29
 -13   6  22   -0.05    0.27
 -12   6  20    0.65    0.29
 -11   6  19    0.33    0.29
 -10   6  19    2.63    0.29
  -9   6  18    0.44    0.24
  -8   6  18    8.02    0.29
  -7   6  17    0.39    0.27
  -7   6  18    0.25    0.23
  -6   6  17    0.70    0.23
  -5   6  17    0.00    0.23
  -4   6  18    0.57    0.23
  -3   6  18    0.44    0.25
  -2   6  18    3.33    0.26
  -1   6  19    0.08    0.25
   0   6  20    1.89    0.26
   1   6  20    0.50    0.24
   1   6  21   -0.14    0.26
   2   6  22    5.77    0.28
   2   6  23    3.65    0.26
   3   6  23    0.08    0.25
   3   6  24    0.18    0.28
   3   6  25   -0.04    0.26
   4   6  26    5.99    0.34
   4   6  27    2.15    0.34
 -16   5  17    0.20    0.33
 -15   5  16    3.01    0.30
 -14   5  15    0.04    0.28
 -13   5  14    4.40    0.31
 -11   5  13    3.06    0.25
  -9   5  12   14.55    0.33
  -8   5  12    0.44    0.23
  -7   5  12    5.17    0.27
  -6   5  12    0.57    0.24
  -5   5  12    2.07    0.24
  -4   5  12    0.53    0.24
  -3   5  12   31.99    0.37
  -1   5  13   11.73    0.29
   0   5  13    0.32    0.23
   1   5  14   68.89    0.48
   2   5  15    0.72    0.19
   4   5  17    0.05    0.17
   5   5  18    6.15    0.28
   6   5  19    0.45    0.24
   6   5  20    0.20    0.23
   7   5  21    0.58    0.27
   7   5  22    5.94    0.30
   8   5  24    0.82    0.28
   8   5  25    0.34    0.28
   8   5  26   -0.10    0.26
 -20   4  17    1.60    0.41
 -18   4  14    4.96    0.34
 -17   4  13    0.18    0.30
 -16   4  12    7.15    0.36
 -13   4  10    0.18    0.26
 -11   4   9    0.35    0.24
  -8   4   8   19.96    0.35
  -7   4   8    1.34    0.25
  -6   4   8   28.04    0.38
  -5   4   8    0.80    0.25
  -4   4   8   21.60    0.34
   0   4   9   -0.06    0.23
   2   4  10    0.18    0.23
   3   4  11    0.23    0.22
   7   4  15    0.05    0.25
   8   4  16   15.46    0.32
   9   4  18    0.17    0.25
  10   4  20    5.62    0.28
  11   4  23    0.16    0.29
  11   4  24    0.13    0.30
  -8   3   5    0.85    0.28
  -7   3   5   15.22    0.35
  -6   3   5    1.13    0.24
  -5   3   5   27.07    0.40
  -4   3   5    0.36    0.23
   0   3   6    0.38    0.24
   2   3   7    1.23    0.23
   4   3   8    0.78    0.24
   5   3   9    3.87    0.27
   8   3  12   -0.02    0.25
   9   3  13    7.79    0.27
  12   3  19    0.33    0.26
  13   3  21    2.47    0.32
  13   3  22    0.73    0.27
  14   3  26   -0.22    0.33
 -23   2  13    0.02    0.47
  -2   2   3  742.18    2.07
  10   2  11    8.73    0.29
  12   2  14    6.63    0.30
  13   2  16   -0.07    0.26
  14   2  18    0.22    0.28
  15   2  22    0.07    0.29
 -18   1   5    0.33    0.59
  12   1  11    0.34    0.25
  17   1  23    3.89    0.37
  17   1  24    3.70    0.38
  13   0  10    0.04    0.31
  18   0  22    0.29    0.38
 -19  -1   3    2.28    0.46
  -6  -1  -2    0.12    0.28
  -5  -1  -2  134.57    1.10
   8  -2   2   26.50    0.63
  18  -2  16    5.78    0.56
  19  -2  19    0.09    0.47
 -24  -3   6    0.07    0.42
 -20  -3   2    0.43    0.35
 -10  -3  -3    0.24    0.27
  -1  -3  -3  147.87    0.80
  10  -3   3    0.04    0.29
  11  -3   4    8.87    0.44
 -18  -4   0    0.45    0.30
 -12  -4  -3    5.65    0.27
  -7  -4  -4    0.19    0.23
  -6  -4  -4   95.51    0.59
  -5  -4  -4    2.06    0.26
  -4  -4  -4    9.88    0.24
   1  -4  -3    1.21    0.18
   7  -4   0    0.20    0.23
 -23  -5   4    0.64    0.39
 -22  -5   3    0.28    0.36
 -21  -5   2    2.60    0.34
 -17  -5  -1    0.89    0.25
 -15  -5  -2    5.86    0.28
 -12  -5  -3    0.73    0.25
  -8  -5  -4    0.16    0.24
  -7  -5  -4    8.03    0.29
  -6  -5  -4    1.24    0.24
  -5  -5  -4   25.31    0.35
  -4  -5  -4    1.38    0.25
  -3  -5  -4   25.89    0.35
   1  -5  -3   15.79    0.32
   7  -5   0    3.02    0.29
  16  -5  10    0.15    0.37
  17  -5  12    5.30    0.49
 -22  -6   3    1.22    0.34
 -21  -6   2    0.16    0.32
 -18  -6   0    1.77    0.33
 -15  -6  -2    0.56    0.26
 -12  -6  -3    6.64    0.27
  -8  -6  -4   14.38    0.29
  -7  -6  -4    0.38    0.24
  -6  -6  -4   30.63    0.36
  -5  -6  -4   -0.04    0.23
  -4  -6  -4    9.04    0.28
  -3  -6  -4    0.71    0.16
   1  -6  -3    0.06    0.23
   7  -6   0    0.10    0.23
  14  -6   7    8.08    0.38
 -19  -7   1    1.86    0.37
 -16  -7  -1    0.21    0.27
 -14  -7  -2   -0.12    0.26
 -11  -7  -3    5.34    0.26
  -1  -7  -3    1.12    0.23
   0  -7  -3    0.60    0.24
   3  -7  -2    8.30    0.26
   5  -7  -1    2.64    0.25
   8  -7   1    0.41    0.24
   9  -7   2    2.56    0.25
  10  -7   3    0.29    0.28
  11  -7   4   15.76    0.38
  12  -7   5    0.00    0.29
  15  -7   9    1.74    0.35
 -18  -8   1    0.89    0.34
 -15  -8  -1   -0.27    0.29
 -12  -8  -2    0.88    0.27
  -9  -8  -3    0.20    0.23
  -8  -8  -3    0.37    0.25
  -7  -8  -3    0.35    0.25
  -6  -8  -3    1.51    0.25
  -5  -8  -3   -0.02    0.24
  -4  -8  -3    3.97    0.27
  -3  -8  -3    0.79    0.25
   1  -8  -2    0.30    0.25
   7  -8   1    0.09    0.25
   8  -8   2    3.23    0.29
  13  -8   7    0.69    0.31
  15  -8  10   -0.12    0.34
  16  -8  12    2.12    0.41
 -15  -9   0    0.90    0.32
 -13  -9  -1    1.78    0.30
 -12  -9  -1    0.54    0.28
  -9  -9  -2    0.34    0.27
  -8  -9  -2    0.48    0.26
  -7  -9  -2    4.90    0.26
  -4  -9  -2    0.30    0.23
  -3  -9  -2    5.60    0.28
  -2  -9  -2   -0.08    0.25
   1  -9  -1    0.71    0.25
   4  -9   0    0.25    0.23
   7  -9   2    5.20    0.29
   8  -9   3    0.05    0.30
  12  -9   7    0.54    0.34
  14  -9  10    0.02    0.37
 -12 -10   0    0.22    0.30
  -9 -10  -1    0.07    0.27
  -8 -10  -1    1.01    0.30
  -7 -10  -1    0.06    0.28
  -6 -10  -1    0.40    0.27
  -5 -10  -1   -0.10    0.26
  -4 -10  -1    1.03    0.27
  -3 -10  -1   -0.06    0.28
  -2 -10  -1    0.68    0.24
   1 -10   0    0.02    0.27
   3 -10   1    0.17    0.26
   5 -10   2    0.05    0.28
   8 -10   4    0.47    0.29
   9 -10   5    0.17    0.30
  10 -10   6    4.30    0.35
  -1 -11   1    0.32    0.30
   0 -11   1    0.14    0.27
   2 -11   2    0.04    0.30
   4 -11   3    0.27    0.30
   7 -11   5    1.68    0.32
  -4   7  26    0.02    0.29
 -14   6  21    0.54    0.32
 -13   6  20   -0.07    0.29
 -12   6  19    5.72    0.31
 -11   6  18    0.38    0.28
 -10   6  17    6.78    0.31
 -10   6  18    7.68    0.29
  -9   6  17    0.06    0.24
  -8   6  17    2.69    0.26
  -6   6  16    2.29    0.24
  -5   6  16    0.27    0.22
  -4   6  17    8.20    0.27
  -3   6  17    0.46    0.24
  -2   6  17    0.60    0.25
  -1   6  18    0.28    0.25
   0   6  18    2.29    0.23
   0   6  19    3.13    0.20
   1   6  19   -0.02    0.24
   2   6  20    1.65    0.27
   2   6  21   -0.05    0.24
   3   6  21   -0.09    0.24
   3   6  22    0.58    0.27
   4   6  23    0.27    0.25
   4   6  24    8.33    0.31
   4   6  25    1.55    0.28
   5   6  26   -0.17    0.31
   5   6  27    0.13    0.32
 -18   5  19   -0.23    0.38
 -17   5  18    0.24    0.31
 -16   5  16   -0.02    0.33
 -15   5  15    2.82    0.32
 -12   5  13    0.08    0.25
 -10   5  12    0.46    0.22
  -6   5  11    0.39    0.27
  -2   5  12    0.22    0.24
  -1   5  12   23.46    0.34
   1   5  13   13.06    0.30
   2   5  14    1.79    0.26
   3   5  15    3.18    0.25
   4   5  16    0.38    0.22
   5   5  17    0.11    0.24
   6   5  18    0.16    0.25
   7   5  20    1.91    0.26
   8   5  22    0.17    0.26
   8   5  23    0.30    0.28
   9   5  25    0.73    0.28
   9   5  26    0.55    0.33
   9   5  27    0.09    0.32
 -19   4  15    0.05    0.33
 -15   4  11   -0.11    0.25
 -14   4  10   19.39    0.40
 -12   4   9   25.49    0.39
  -9   4   8    0.51    0.24
  -3   4   8    0.51    0.17
  -2   4   8    4.53    0.26
   1   4   9    0.90    0.23
   4   4  11   25.40    0.34
   5   4  12    0.04    0.23
   6   4  13    5.26    0.26
   7   4  14    0.86    0.24
   9   4  17    1.10    0.24
  10   4  19    2.57    0.26
  11   4  22    0.36    0.28
  12   4  25    0.19    0.32
  12   4  26    0.76    0.32
  12   4  27    3.07    0.36
 -22   3  15   -0.04    0.40
 -20   3  12    0.19    0.36
 -19   3  11    8.13    0.39
 -18   3  10    0.22    0.31
 -17   3   9    0.79    0.31
 -14   3   7    0.06    0.28
 -12   3   6    0.02    0.27
  -9   3   5   28.63    0.46
  -3   3   5    1.93    0.25
  10   3  14    0.00    0.23
  11   3  16    2.97    0.25
  12   3  18    0.25    0.26
  13   3  20    0.17    0.29
  14   3  24    0.14    0.31
  14   3  25    0.14    0.32
 -20   2   9    3.04    0.41
 -19   2   8    0.07    0.36
 -15   2   5    0.45    0.33
 -13   2   4    0.28    0.32
 -10   2   3   15.92    0.43
   5   2   6    0.89    0.22
  11   2  12    0.07    0.23
  15   2  21    0.09    0.28
  16   2  25    0.95    0.38
 -23   1  10    0.54    0.66
 -15   1   3   18.90    0.91
  -2   1   1    0.13    0.26
   9   1   7   15.59    0.40
  10   1   8    0.49    0.26
  14   1  14    0.36    0.28
  15   1  16    1.71    0.31
  16   1  19    0.21    0.27
  17   1  22    1.07    0.34
  17   0  18   -0.06    0.32
 -23  -1   7    0.20    0.56
 -16  -1   1    0.06    0.36
 -14  -1   0    0.05    0.34
   5  -1   1   60.08    1.27
  16  -1  13    0.31    0.36
  18  -1  18    0.15    0.38
  19  -1  22    0.38    0.44
 -24  -2   7    0.72    0.50
 -19  -2   2    0.22    0.32
 -16  -2   0    0.04    0.28
 -14  -2  -1   25.46    0.47
 -11  -2  -2    0.49    0.28
   0  -2  -2  519.92    1.76
   3  -2  -1    2.42    0.30
 -23  -3   5    3.22    0.43
 -22  -3   4    0.37    0.38
 -21  -3   3    2.41    0.37
 -17  -3   0    0.14    0.29
 -13  -3  -2   15.61    0.39
  -9  -3  -3    8.00    0.33
   2  -3  -2    0.68    0.23
  16  -3  11    0.16    0.64
 -19  -4   1    0.06    0.30
 -16  -4  -1    0.27    0.28
 -14  -4  -2    1.11    0.25
 -11  -4  -3    0.45    0.24
   0  -4  -3   61.68    0.50
   3  -4  -2    0.61    0.25
   5  -4  -1    3.74    0.26
 -18  -5   0    0.03    0.26
 -16  -5  -1    0.21    0.28
 -14  -5  -2    0.65    0.29
 -11  -5  -3   12.89    0.32
   0  -5  -3    0.84    0.22
   3  -5  -2    4.25    0.26
   5  -5  -1   35.69    0.42
  14  -5   7    0.12    0.29
 -19  -6   1    0.26    0.34
 -16  -6  -1   13.62    0.34
 -14  -6  -2    2.53    0.27
 -11  -6  -3    0.23    0.24
   0  -6  -3    4.39    0.25
   3  -6  -2    0.41    0.24
   5  -6  -1    0.67    0.25
   8  -6   1    0.44    0.23
  13  -6   6    0.41    0.29
 -20  -7   2    0.34    0.32
 -17  -7   0    0.49    0.27
 -15  -7  -1    2.82    0.30
 -13  -7  -2    6.54    0.28
 -10  -7  -3    0.36    0.23
  -9  -7  -3   10.32    0.29
  -3  -7  -3   12.34    0.29
  -2  -7  -3    0.00    0.25
   2  -7  -2    0.82    0.23
   4  -7  -1    1.96    0.25
   6  -7   0    0.19    0.23
  16  -7  11    0.04    0.36
  17  -7  13    1.10    0.44
 -16  -8   0    0.97    0.29
 -14  -8  -1    1.38    0.30
 -11  -8  -2    0.19    0.25
 -10  -8  -2    5.94    0.30
  -1  -8  -2   -0.06    0.23
   0  -8  -2    0.53    0.23
   3  -8  -1    0.23    0.22
   5  -8   0    0.52    0.22
   9  -8   3    0.22    0.27
  10  -8   4    0.67    0.26
  11  -8   5    0.35    0.27
  12  -8   6    2.60    0.30
 -16  -9   1    0.39    0.31
 -14  -9   0    0.22    0.29
 -11  -9  -1    1.52    0.28
  -6  -9  -2    0.03    0.24
  -5  -9  -2    0.56    0.19
   0  -9  -1    0.00    0.25
   3  -9   0    2.48    0.26
   5  -9   1    0.56    0.24
   6  -9   2   -0.15    0.27
   9  -9   4    1.83    0.28
  10  -9   5   -0.11    0.28
  11  -9   6    3.78    0.32
 -13 -10   1   -0.15    0.32
 -11 -10   0    0.15    0.30
 -10 -10   0    0.04    0.30
  -1 -10   0   -0.15    0.27
   0 -10   0    0.40    0.24
   2 -10   1    0.60    0.27
   4 -10   2    0.49    0.27
   6 -10   3    2.67    0.30
   7 -10   4   -0.15    0.28
  11 -10   8    0.14    0.35
  -8 -11   1   -0.09    0.32
  -7 -11   1   -0.05    0.31
  -6 -11   1    0.12    0.30
  -5 -11   1    0.87    0.29
  -4 -11   1    0.24    0.31
  -3 -11   1    0.26    0.30
  -2 -11   1    0.38    0.26
   0 -11   2    0.27    0.28
   1 -11   2   -0.04    0.30
   3 -11   3    3.07    0.32
   5 -11   4    1.48    0.34
   6 -11   5    0.22    0.32
  -8   7  24    0.10    0.30
  -7   7  24   -0.03    0.30
  -6   7  23   -0.15    0.27
  -6   7  24    0.38    0.31
  -6   7  25    0.06    0.30
  -5   7  23    4.65    0.29
  -5   7  24    0.28    0.31
  -5   7  25    0.42    0.30
  -4   7  24    0.22    0.31
  -4   7  25    0.03    0.32
  -3   7  24    0.31    0.28
  -3   7  25    0.55    0.34
  -3   7  26    0.35    0.28
  -2   7  25   -0.02    0.30
  -2   7  26    0.02    0.32
  -1   7  26    1.05    0.28
 -15   6  21   -0.24    0.33
 -14   6  20    3.22    0.33
 -13   6  19    0.25    0.29
 -12   6  18    2.80    0.30
 -11   6  17   -0.27    0.27
  -9   6  16    0.35    0.25
  -8   6  16    1.04    0.26
  -7   6  16   -0.01    0.23
  -4   6  16    1.49    0.23
  -3   6  16    0.35    0.25
  -2   6  16    4.99    0.26
  -1   6  17    0.23    0.25
   0   6  17    1.14    0.24
   1   6  18    0.16    0.24
   2   6  19    5.45    0.29
   3   6  20    0.27    0.26
   4   6  21    1.71    0.25
   4   6  22    2.55    0.28
   5   6  23    0.25    0.25
   5   6  24    0.21    0.29
   5   6  25    0.27    0.27
   6   6  26    4.46    0.30
   6   6  27    1.28    0.34
 -18   5  18   -0.20    0.37
 -17   5  17    1.21    0.31
 -14   5  14   -0.10    0.26
 -13   5  13    1.00    0.25
 -11   5  12    7.10    0.28
  -9   5  11   17.14    0.34
  -8   5  11    0.63    0.23
  -7   5  11    3.98    0.25
  -5   5  11    4.76    0.25
  -4   5  11    0.15    0.24
  -3   5  11   33.32    0.37
   0   5  12    1.43    0.25
   2   5  13    0.32    0.23
   3   5  14    1.33    0.26
   4   5  15    0.47    0.24
   5   5  16    7.45    0.28
   6   5  17    0.11    0.24
   7   5  19    1.75    0.26
   8   5  21    0.28    0.25
   9   5  23    5.37    0.29
   9   5  24    0.59    0.30
  10   5  27    0.40    0.30
 -20   4  16    0.53    0.35
 -18   4  13    2.21    0.32
 -17   4  12    0.09    0.31
 -16   4  11    2.61    0.32
 -13   4   9    0.11    0.28
 -10   4   8   39.26    0.44
  -1   4   8    2.06    0.24
   3   4  10    0.44    0.24
   8   4  15   12.47    0.30
   9   4  16    0.11    0.23
  10   4  18    1.59    0.25
  11   4  20    0.18    0.28
  11   4  21    0.51    0.25
  12   4  23    6.66    0.33
  12   4  24    1.97    0.30
 -21   3  13    3.64    0.41
 -16   3   8   -0.05    0.28
 -10   3   5    0.07    0.27
  -2   3   5    0.23    0.23
   1   3   6   65.57    0.51
   3   3   7   29.54    0.39
   6   3   9    0.08    0.24
   7   3  10    4.53    0.26
   8   3  11    0.11    0.25
   9   3  12    4.11    0.29
  11   3  15    0.34    0.22
  12   3  17    0.24    0.24
  13   3  19    1.51    0.29
  14   3  22    0.00    0.33
  14   3  23   -0.09    0.30
 -21   2  10    0.07    0.41
 -18   2   7    0.67    0.38
  -1   2   3    4.88    0.33
   2   2   4  125.58    0.83
   4   2   5   24.81    0.40
  12   2  13   12.05    0.38
  13   2  15    0.12    0.26
  14   2  17    1.28    0.30
  15   2  20   -0.22    0.28
  16   2  23    0.19    0.35
  16   2  24    0.61    0.32
 -13   1   2   26.60    1.02
   8   1   6    0.56    0.23
  11   1   9   27.94    0.47
  13   1  12    0.46    0.24
  16   1  18    0.25    0.32
  17   1  21    0.74    0.32
  15   0  13    0.42    0.28
  16   0  15    2.46    0.32
  18   0  21   -0.47    0.38
 -20  -1   4    0.62    0.45
  13  -1   8    6.35    0.55
  15  -1  11   25.58    0.66
  17  -1  15   10.24    0.48
  19  -1  21    4.32    0.46
 -23  -2   6    0.21    0.45
 -20  -2   3    6.70    0.42
   9  -2   3    0.37    0.35
  12  -2   6    6.20    0.68
 -15  -3  -1   16.43    0.39
  -8  -3  -3    0.46    0.27
  -3  -3  -3   25.94    0.39
  -2  -3  -3    1.12    0.19
   4  -3  -1    1.47    0.23
 -24  -4   6    0.33    0.41
 -20  -4   2    5.40    0.34
 -10  -4  -3    9.08    0.29
  -1  -4  -3    1.12    0.25
  13  -4   6    0.16    0.31
 -19  -5   1    0.55    0.26
 -10  -5  -3    0.92    0.24
  -1  -5  -3   15.69    0.31
   8  -5   1    0.67    0.23
  13  -5   6    8.24    0.37
 -22  -6   4    0.11    0.38
 -21  -6   3    0.09    0.35
 -20  -6   2    0.68    0.30
 -17  -6   0    0.03    0.32
 -13  -6  -2    0.84    0.23
 -10  -6  -3    9.15    0.28
  -9  -6  -3    0.38    0.24
  -2  -6  -3    1.17    0.23
  -1  -6  -3    0.16    0.22
   2  -6  -2    4.52    0.25
   6  -6   0    1.29    0.24
   9  -6   2    0.04    0.25
  10  -6   3    8.73    0.34
  15  -6   9    0.10    0.34
  18  -6  15    0.13    0.46
 -18  -7   1   -0.16    0.30
 -14  -7  -1    0.09    0.27
 -12  -7  -2    0.12    0.26
  -8  -7  -3    2.55    0.24
  -7  -7  -3    8.57    0.28
  -6  -7  -3    0.25    0.24
  -5  -7  -3    4.25    0.26
  -4  -7  -3    2.44    0.25
   1  -7  -2    6.98    0.27
   7  -7   1    2.85    0.24
 -18  -8   2    1.18    0.34
 -17  -8   1    0.35    0.30
 -15  -8   0    0.21    0.29
 -13  -8  -1    0.20    0.26
  -9  -8  -2    0.18    0.25
  -8  -8  -2    3.30    0.26
  -3  -8  -2    0.43    0.25
  -2  -8  -2    1.68    0.25
   2  -8  -1    0.42    0.24
   4  -8   0    2.21    0.26
   6  -8   1    0.75    0.24
   7  -8   2    0.19    0.27
  13  -8   8    1.05    0.33
  15  -8  11    0.27    0.34
 -15  -9   1    2.23    0.32
 -13  -9   0    2.95    0.31
 -10  -9  -1   -0.21    0.27
  -9  -9  -1    2.16    0.27
  -8  -9  -1    0.12    0.24
  -3  -9  -1    2.55    0.25
  -2  -9  -1   -0.27    0.26
  -1  -9  -1    0.76    0.23
   2  -9   0    0.15    0.26
   4  -9   1    0.93    0.25
   7  -9   3    1.13    0.27
  12  -9   8    1.35    0.35
  13  -9   9    1.18    0.34
 -12 -10   1    0.22    0.30
  -9 -10   0   -0.32    0.26
  -8 -10   0    0.78    0.29
  -7 -10   0   -0.24    0.28
  -6 -10   0   -0.21    0.28
  -5 -10   0   -0.06    0.27
  -4 -10   0    0.63    0.27
  -3 -10   0    0.01    0.29
  -2 -10   0    0.57    0.24
   1 -10   1    0.49    0.26
   3 -10   2    0.06    0.26
   5 -10   3    0.10    0.27
   8 -10   5    2.50    0.30
   9 -10   6   -0.08    0.31
  10 -10   7    0.58    0.33
  -2 -11   2    0.38    0.30
  -1 -11   2    0.78    0.30
   1 -11   3    0.28    0.31
   2 -11   3    0.32    0.29
   4 -11   4    0.15    0.31
   5 -11   5    0.29    0.29
 -10   7  23    0.12    0.33
  -9   7  23   -0.06    0.31
  -8   7  22    0.38    0.28
  -8   7  23    0.18    0.30
  -7   7  22   -0.08    0.29
  -7   7  23    0.25    0.27
  -6   7  22   -0.35    0.30
  -5   7  22    0.75    0.30
  -4   7  22   -0.03    0.28
  -4   7  23    0.47    0.27
  -3   7  22    5.57    0.30
  -3   7  23    2.38    0.30
  -2   7  23   -0.02    0.28
  -2   7  24    0.13    0.27
  -1   7  24    0.68    0.30
  -1   7  25    2.00    0.29
   0   7  25    0.05    0.29
   0   7  26   -0.56    0.31
   1   7  26   -0.01    0.29
 -15   6  20    0.15    0.33
 -14   6  19    1.36    0.33
 -13   6  18    0.00    0.29
 -12   6  17    0.84    0.28
 -11   6  16    0.76    0.27
 -10   6  16    7.04    0.29
  -9   6  15    0.70    0.24
  -8   6  15    3.90    0.26
  -7   6  15    0.25    0.25
  -6   6  15    3.72    0.26
  -5   6  15    0.09    0.25
  -4   6  15    9.78    0.29
  -3   6  15   -0.04    0.25
  -2   6  15    2.30    0.24
  -1   6  16    0.67    0.25
   0   6  16    2.72    0.23
   1   6  17    0.17    0.23
   2   6  18    3.60    0.26
   3   6  19   -0.04    0.25
   4   6  20    3.37    0.27
   5   6  22    0.35    0.26
   6   6  24    2.68    0.29
   6   6  25   -0.31    0.30
 -17   5  16    0.87    0.34
 -16   5  15    0.37    0.29
 -15   5  14    0.32    0.28
 -14   5  13    0.24    0.28
 -12   5  12    0.05    0.25
 -10   5  11    0.44    0.23
  -2   5  11    0.78    0.17
  -1   5  11    3.02    0.25
   1   5  12   22.16    0.32
   4   5  14    0.71    0.24
   5   5  15   15.23    0.30
   6   5  16    0.56    0.23
   7   5  18    4.02    0.25
   8   5  19    0.15    0.22
   8   5  20    0.39    0.24
   9   5  21    0.65    0.29
   9   5  22    1.16    0.27
  10   5  24    0.22    0.32
  10   5  25    0.23    0.32
  10   5  26    0.23    0.33
 -20   4  15    0.82    0.34
 -19   4  14   -0.06    0.33
 -15   4  10    0.23    0.30
 -11   4   8    0.08    0.25
  -8   4   7   15.12    0.34
  -7   4   7    0.66    0.25
  -6   4   7   13.23    0.32
  -5   4   7    0.68    0.24
  -4   4   7   29.51    0.38
  -3   4   7    0.47    0.23
   0   4   8  190.45    0.77
   2   4   9   14.93    0.31
   4   4  10    2.56    0.24
   5   4  11    0.23    0.23
   6   4  12    0.81    0.23
   7   4  13   -0.09    0.24
   8   4  14    3.00    0.26
  10   4  17    0.30    0.24
  11   4  19    0.43    0.25
  12   4  22    0.74    0.29
  13   4  26   -0.05    0.33
 -22   3  14    0.30    0.43
 -15   3   7   23.20    0.47
 -13   3   6    0.77    0.31
  -1   3   5   21.46    0.36
   2   3   6    0.09    0.24
   5   3   8   22.47    0.36
  10   3  13    0.17    0.23
  12   3  16    0.53    0.28
  14   3  21    0.20    0.32
  15   3  25   -0.03    0.34
 -22   2  11    2.13    0.43
 -17   2   6    0.17    0.35
 -11   2   3    0.61    0.30
   7   2   7    0.62    0.23
   8   2   8    3.36    0.26
   9   2   9    0.27    0.23
  10   2  10    0.44    0.23
  15   2  19    0.37    0.27
  16   2  22    0.45    0.34
   4   1   3    0.19    0.34
   7   1   5   73.77    0.72
  12   1  10   -0.01    0.27
  15   1  15   10.88    0.36
   9   0   5    1.64    0.32
  10   0   6   12.03    0.44
  11   0   7    0.04    0.29
  14   0  11    0.36    0.30
  17   0  17    0.18    0.34
  18   0  20    0.90    0.40
 -22  -1   6    0.21    0.50
 -21  -1   5   15.04    0.65
 -11  -1  -1  110.20    0.98
 -22  -2   5    0.45    0.39
 -21  -2   4    0.05    0.34
 -10  -2  -2    2.62    0.30
 -18  -3   1    0.53    0.29
 -12  -3  -2    0.11    0.23
  -7  -3  -3   12.87    0.32
  -6  -3  -3    0.44    0.24
  -5  -3  -3    5.58    0.28
  -4  -3  -3    0.17    0.23
   1  -3  -2   75.01    0.61
 -23  -4   5    0.04    0.38
 -22  -4   4    6.20    0.40
 -21  -4   3    0.10    0.34
 -17  -4   0    0.19    0.25
 -15  -4  -1    1.65    0.31
 -13  -4  -2    0.05    0.24
  -9  -4  -3    0.49    0.24
  -2  -4  -3   22.32    0.35
   2  -4  -2   30.18    0.40
   6  -4   0  134.52    0.77
  11  -4   4    0.34    0.29
  12  -4   5    0.71    0.31
 -23  -5   5    1.28    0.42
 -22  -5   4   -0.01    0.35
 -21  -5   3    4.67    0.36
 -20  -5   2    0.24    0.27
 -17  -5   0    4.62    0.28
 -15  -5  -1    8.45    0.33
 -13  -5  -2   23.57    0.35
  -9  -5  -3    5.33    0.27
  -2  -5  -3    2.05    0.24
   2  -5  -2    0.91    0.24
   6  -5   0    1.33    0.25
   9  -5   2   17.81    0.35
  12  -5   5    0.21    0.29
 -18  -6   1    0.17    0.31
 -15  -6  -1    0.31    0.26
 -12  -6  -2    3.12    0.25
  -8  -6  -3    1.94    0.24
  -7  -6  -3    0.42    0.23
  -6  -6  -3    1.38    0.25
  -5  -6  -3    0.01    0.23
  -4  -6  -3    6.06    0.25
  -3  -6  -3    0.24    0.23
   1  -6  -2    0.71    0.23
   4  -6  -1    2.66    0.25
  16  -6  11    1.20    0.39
 -20  -7   3    0.13    0.36
 -19  -7   2    0.44    0.33
 -16  -7   0   -0.23    0.27
 -11  -7  -2   14.38    0.31
 -10  -7  -2    0.02    0.24
  -1  -7  -2    7.15    0.26
   0  -7  -2    0.83    0.25
   3  -7  -1    6.55    0.25
   5  -7   0   16.24    0.32
   8  -7   2    1.80    0.25
   9  -7   3   10.31    0.33
  12  -7   6    0.18    0.29
  15  -7  10    6.68    0.40
 -16  -8   1    1.53    0.29
 -14  -8   0    9.26    0.33
 -12  -8  -1    0.05    0.24
 -11  -8  -1   -0.17    0.26
  -7  -8  -2    0.47    0.23
  -6  -8  -2    2.25    0.25
  -5  -8  -2    0.13    0.24
  -4  -8  -2    1.22    0.22
   0  -8  -1    0.56    0.22
   1  -8  -1    0.32    0.22
   3  -8   0    0.40    0.24
   5  -8   1    0.08    0.24
   8  -8   3    0.69    0.25
   9  -8   4   -0.01    0.29
  12  -8   7    7.78    0.39
 -16  -9   2   -0.03    0.31
 -14  -9   1    0.00    0.29
 -12  -9   0    0.19    0.24
 -11  -9   0    1.92    0.28
  -7  -9  -1    2.86    0.25
  -6  -9  -1    0.46    0.27
  -5  -9  -1    0.89    0.26
  -4  -9  -1    0.64    0.24
   0  -9   0   -0.19    0.26
   1  -9   0    1.08    0.23
   3  -9   1    3.17    0.27
   5  -9   2    0.39    0.24
   8  -9   4    0.42    0.27
   9  -9   5    0.92    0.28
  10  -9   6    0.53    0.28
  11  -9   7   -0.04    0.30
 -13 -10   2    0.23    0.31
 -11 -10   1    0.17    0.27
 -10 -10   1    0.96    0.30
  -9 -10   1   -0.47    0.26
  -1 -10   1    0.09    0.27
   0 -10   1   -0.32    0.25
   2 -10   2    0.94    0.27
   4 -10   3    2.00    0.28
   6 -10   4    0.54    0.29
   7 -10   5    0.14    0.28
   8 -10   6    0.15    0.31
  10 -10   8    1.58    0.37
  11 -10   9    0.86    0.38
  -8 -11   2   -0.08    0.28
  -7 -11   2    0.68    0.32
  -6 -11   2   -0.40    0.30
  -5 -11   2    0.87    0.30
  -4 -11   2   -0.14    0.31
  -3 -11   2    0.23    0.27
   0 -11   3    0.15    0.30
   3 -11   4    1.94    0.31
   4 -11   5    0.08    0.32
   6 -11   6    0.05    0.32
 -11   7  22    1.68    0.34
 -10   7  22    0.13    0.32
  -9   7  21    1.81    0.32
  -9   7  22    0.39    0.28
  -8   7  21    0.05    0.29
  -7   7  20    0.43    0.24
  -7   7  21    0.97    0.28
  -6   7  20   -0.04    0.28
  -6   7  21   -0.27    0.26
  -5   7  20   -0.14    0.27
  -5   7  21    1.45    0.26
  -4   7  20    0.46    0.24
  -4   7  21   -0.06    0.28
  -3   7  21    1.16    0.28
  -2   7  21    0.20    0.28
  -2   7  22    0.25    0.26
  -1   7  22    5.89    0.31
  -1   7  23    0.70    0.21
   0   7  23   -0.20    0.28
   0   7  24   -0.15    0.27
   1   7  24    0.83    0.30
   1   7  25    1.88    0.33
   2   7  25    0.48    0.27
   2   7  26    0.08    0.32
 -16   6  20    0.88    0.34
 -15   6  19   -0.06    0.31
 -14   6  18    3.81    0.33
 -13   6  17    0.03    0.28
 -12   6  16    4.53    0.30
 -10   6  15    9.39    0.30
  -8   6  14   24.73    0.34
  -7   6  14    0.12    0.25
  -6   6  14    3.60    0.26
  -5   6  14    0.45    0.25
  -4   6  14    5.09    0.27
  -3   6  14    0.23    0.23
  -1   6  15    0.33    0.25
   1   6  16    0.17    0.24
   2   6  17    0.76    0.25
   3   6  18    0.44    0.25
   4   6  19    4.22    0.27
   5   6  20   -0.27    0.25
   5   6  21    0.19    0.25
   6   6  22    1.58    0.28
   6   6  23    0.89    0.26
   7   6  24    0.03    0.27
   7   6  25    0.32    0.29
   7   6  26    0.10    0.27
 -19   5  18    0.95    0.35
 -18   5  17    0.19    0.31
 -13   5  12    2.79    0.25
 -11   5  11    5.17    0.27
  -8   5  10    0.26    0.23
  -7   5  10    0.24    0.24
  -6   5  10    0.69    0.22
  -5   5  10    2.40    0.24
  -4   5  10    0.80    0.24
  -3   5  10   31.99    0.37
   0   5  11    1.26    0.25
   2   5  12    0.70    0.23
   3   5  13    3.64    0.20
   7   5  17    2.33    0.25
   8   5  18    0.12    0.23
   9   5  20    0.87    0.25
  10   5  23    0.22    0.30
  11   5  26    0.05    0.32
 -21   4  16    0.04    0.40
 -14   4   9    2.92    0.30
 -12   4   8    9.90    0.36
  -9   4   7    0.68    0.23
  -2   4   7    6.73    0.28
   1   4   8    1.92    0.25
   3   4   9    0.25    0.24
   9   4  15   -0.16    0.23
  11   4  18    0.15    0.28
  12   4  21    3.85    0.29
  13   4  24    0.01    0.31
  13   4  25   -0.13    0.32
 -19   3  10    5.83    0.40
 -11   3   5    7.53    0.34
   0   3   5    0.72    0.25
   4   3   7    1.19    0.25
  11   3  14    3.60    0.25
  13   3  18    7.18    0.30
  14   3  20   -0.09    0.32
  15   3  23    1.97    0.35
  15   3  24    6.62    0.35
   0   2   3   70.90    0.68
   6   2   6   15.99    0.35
  11   2  11    0.02    0.23
  13   2  14    0.10    0.25
  14   2  16   13.10    0.33
  15   2  18   -0.24    0.29
  16   2  21    1.37    0.34
 -10   1   1    0.56    0.46
   2   1   2    0.12    0.27
  14   1  13    0.10    0.28
  16   1  17    0.25    0.31
  17   1  20   -0.01    0.32
 -17   0   3    0.30    0.53
  12   0   8    0.51    0.34
  18  -1  17    0.10    0.40
  19  -1  20    4.30    0.49
 -17  -2   1    0.26    0.28
 -15  -2   0    0.47    0.32
 -13  -2  -1    0.43    0.27
  -1  -2  -2    4.56    0.35
  10  -2   4    4.51    0.47
  19  -2  18    0.14    0.55
 -19  -3   2    5.81    0.37
 -16  -3   0    1.03    0.30
 -14  -3  -1    1.84    0.32
 -18  -4   1    5.82    0.33
 -12  -4  -2    1.10    0.24
  -8  -4  -3    2.21    0.25
  -7  -4  -3    1.23    0.25
  -6  -4  -3   58.62    0.50
  -5  -4  -3    0.75    0.25
  -4  -4  -3   28.65    0.38
  -3  -4  -3    0.53    0.23
   4  -4  -1   20.18    0.37
  15  -4   9    0.08    0.36
 -18  -5   1    0.56    0.30
 -12  -5  -2    0.53    0.23
  -8  -5  -3    0.41    0.23
  -7  -5  -3    4.82    0.27
  -6  -5  -3    1.09    0.24
  -5  -5  -3    0.56    0.24
  -4  -5  -3    0.44    0.23
  -3  -5  -3    6.61    0.27
   1  -5  -2   21.16    0.34
   4  -5  -1    0.85    0.24
  15  -5   9   -0.05    0.32
 -19  -6   2    0.14    0.34
 -16  -6   0    9.76    0.33
 -14  -6  -1   10.12    0.31
 -11  -6  -2    0.75    0.23
   0  -6  -2    0.15    0.23
   3  -6  -1    0.09    0.23
   5  -6   0    0.49    0.24
   7  -6   1    0.26    0.23
  14  -6   8    3.69    0.34
  17  -6  13   -0.12    0.37
 -18  -7   2    0.01    0.32
 -17  -7   1    0.09    0.27
 -15  -7   0    0.51    0.28
 -13  -7  -1    1.25    0.25
  -9  -7  -2    2.33    0.25
  -8  -7  -2    1.37    0.25
  -3  -7  -2    8.49    0.27
  -2  -7  -2    0.57    0.24
   2  -7  -1   -0.21    0.23
   4  -7   0    1.05    0.24
   6  -7   1    0.16    0.23
  10  -7   4    1.32    0.25
  11  -7   5    0.34    0.25
  16  -7  12    0.13    0.36
  17  -7  14    1.18    0.41
 -17  -8   2    0.05    0.31
 -15  -8   1   -0.16    0.30
 -13  -8   0    0.39    0.27
 -10  -8  -1    5.96    0.28
  -9  -8  -1    0.33    0.23
  -1  -8  -1    0.42    0.23
   2  -8   0    0.60    0.25
   6  -8   2    1.73    0.25
  10  -8   5    0.18    0.27
  11  -8   6    0.33    0.27
 -15  -9   2    0.63    0.32
 -13  -9   1    1.72    0.29
 -10  -9   0    0.33    0.26
  -9  -9   0    0.15    0.27
  -2  -9   0   -0.04    0.26
  -1  -9   0    0.92    0.25
   2  -9   1    0.22    0.25
   4  -9   2    0.33    0.24
   6  -9   3    0.67    0.25
   7  -9   4    2.04    0.26
  12  -9   9    0.10    0.34
  13  -9  10    1.15    0.33
 -12 -10   2    1.35    0.30
 -11 -10   2    0.38    0.26
  -8 -10   1    1.12    0.29
  -7 -10   1    0.17    0.28
  -6 -10   1    0.63    0.28
  -5 -10   1    0.05    0.27
  -4 -10   1    0.92    0.27
  -3 -10   1   -0.06    0.29
  -2 -10   1    0.67    0.19
   1 -10   2    0.32    0.26
   3 -10   3    0.07    0.26
   5 -10   4    0.38    0.28
   9 -10   7   -0.04    0.31
  -7 -11   3    0.38    0.28
  -4 -11   3    0.73    0.28
  -3 -11   3    4.14    0.31
  -2 -11   3    0.15    0.30
  -1 -11   3    0.54    0.27
   1 -11   4    1.40    0.31
   2 -11   4   -0.04    0.26
   3 -11   5    1.32    0.28
   5 -11   6    0.51    0.33
   6 -11   7    0.01    0.32
 -11   7  21    0.53    0.32
 -10   7  20    0.33    0.27
 -10   7  21   -0.04    0.29
  -9   7  20    3.12    0.31
  -8   7  19   -0.03    0.25
  -8   7  20    0.30    0.25
  -7   7  19    0.61    0.26
  -6   7  19    0.42    0.28
  -5   7  19    1.55    0.27
  -4   7  19    0.20    0.27
  -3   7  19    1.37    0.24
  -3   7  20    0.57    0.23
  -2   7  20    0.25    0.26
  -1   7  20    1.48    0.26
  -1   7  21    0.89    0.25
   0   7  21    0.19    0.27
   0   7  22    0.34    0.25
   1   7  22    6.41    0.30
   1   7  23    1.24    0.27
   2   7  23    0.01    0.28
   2   7  24    0.00    0.30
   3   7  25    3.76    0.32
   3   7  26    0.60    0.32
 -16   6  19    1.29    0.33
 -15   6  18    0.12    0.32
 -14   6  17    5.00    0.32
 -13   6  16    0.16    0.27
 -12   6  15    5.95    0.32
 -11   6  15    0.40    0.26
 -10   6  14    4.65    0.28
  -9   6  14    0.54    0.25
  -2   6  14    4.32    0.27
  -1   6  14   -0.13    0.25
   0   6  15    0.01    0.22
   1   6  15    0.41    0.24
   2   6  16    5.17    0.25
   3   6  17    0.42    0.25
   4   6  18    0.74    0.25
   5   6  19    0.12    0.25
   6   6  21    1.78    0.27
   7   6  22    0.57    0.26
   7   6  23    0.02    0.29
   8   6  25    1.36    0.31
   8   6  26    0.47    0.31
 -18   5  16   -0.04    0.35
 -17   5  15    1.54    0.31
 -16   5  14    0.08    0.28
 -15   5  13    0.62    0.26
 -14   5  12    0.23    0.31
 -12   5  11    0.45    0.25
 -10   5  10    0.62    0.23
  -9   5  10    4.38    0.26
  -2   5  10    0.62    0.17
  -1   5  10    6.73    0.26
   1   5  11    3.20    0.25
   3   5  12   32.78    0.37
   4   5  13    0.60    0.23
   5   5  14   15.99    0.30
   6   5  15    1.30    0.25
   7   5  16    6.25    0.28
   8   5  17    0.06    0.23
   9   5  19    3.16    0.26
  10   5  21   -0.22    0.27
  10   5  22    0.83    0.26
  11   5  24    3.05    0.33
  11   5  25    0.90    0.32
 -19   4  13   -0.06    0.36
 -18   4  12   10.69    0.38
 -17   4  11    0.26    0.30
 -16   4  10    7.15    0.35
 -10   4   7   51.41    0.49
  -1   4   7    2.64    0.25
   5   4  10    0.21    0.23
   6   4  11    1.43    0.24
   7   4  12    0.17    0.24
   8   4  13    2.14    0.24
   9   4  14    0.28    0.22
  10   4  16   25.34    0.35
  12   4  20    2.73    0.29
  13   4  22    0.16    0.31
  13   4  23    0.26    0.30
 -21   3  12    2.92    0.42
 -20   3  11    0.18    0.35
 -18   3   9    0.11    0.30
 -17   3   8    0.73    0.32
  -7   3   4  133.76    0.82
  -6   3   4    1.37    0.24
  -5   3   4    8.43    0.30
  -4   3   4    0.49    0.22
   3   3   6    5.22    0.27
   6   3   8   -0.10    0.24
   7   3   9   34.57    0.41
   8   3  10   -0.05    0.23
   9   3  11    9.90    0.29
  10   3  12    0.09    0.24
  12   3  15    0.23    0.23
  13   3  17    5.98    0.30
  14   3  19    0.05    0.28
  15   3  22    2.38    0.31
 -23   2  12    0.17    0.49
 -14   2   4    5.75    0.41
  -6   2   2   51.28    0.65
  -5   2   2    0.56    0.27
   3   2   4    0.89    0.25
  12   2  12   64.98    0.57
  16   2  20    1.06    0.34
  17   2  24   -0.38    0.37
   6   1   4    0.50    0.28
  13   1  11    4.13    0.34
  17   1  19    1.41    0.33
  18   1  23   -0.14    0.37
  16   0  14   38.13    0.60
  18   0  19    1.84    0.40
 -17  -1   2    2.35    0.37
  -9  -2  -2    0.49    0.24
  -2  -2  -2  841.63    2.18
   2  -2  -1  374.56    1.59
  11  -2   5    0.03    0.43
 -24  -3   7    0.05    0.43
 -20  -3   3    0.30    0.33
 -11  -3  -2   25.98    0.40
   0  -3  -2    1.29    0.25
   3  -3  -1    1.98    0.24
   5  -3   0   59.07    0.62
  14  -3   8    0.22    0.42
 -19  -4   2    0.24    0.31
 -16  -4   0    1.28    0.30
 -14  -4  -1   12.44    0.37
 -11  -4  -2    1.35    0.27
   1  -4  -2    2.41    0.19
   7  -4   1    1.00    0.27
 -19  -5   2    0.38    0.31
 -16  -5   0    0.13    0.25
 -14  -5  -1    3.58    0.27
 -11  -5  -2    6.42    0.28
   3  -5  -1   24.37    0.35
   7  -5   1   25.90    0.38
  16  -5  11    0.10    0.36
  18  -5  15    0.08    0.46
 -22  -6   5    0.41    0.37
 -21  -6   4    0.13    0.36
 -20  -6   3    1.22    0.31
 -17  -6   1    0.43    0.28
 -15  -6   0    0.67    0.30
 -13  -6  -1    0.16    0.23
 -10  -6  -2    6.67    0.27
  -9  -6  -2    0.09    0.27
  -1  -6  -2    0.62    0.23
   8  -6   2   11.86    0.30
   9  -6   3    0.47    0.30
  13  -6   7    0.31    0.30
 -20  -7   4   -0.18    0.36
 -19  -7   3   -0.04    0.32
 -16  -7   1    0.06    0.27
 -14  -7   0    0.09    0.26
 -12  -7  -1    0.30    0.22
 -11  -7  -1    2.04    0.25
  -7  -7  -2    4.03    0.24
  -6  -7  -2    0.23    0.24
  -5  -7  -2   18.73    0.32
  -4  -7  -2    1.46    0.24
   1  -7  -1    1.51    0.24
   7  -7   2    4.02    0.25
 -18  -8   3   -0.06    0.32
 -16  -8   2    1.29    0.29
 -14  -8   1    1.98    0.27
 -12  -8   0    0.18    0.25
  -8  -8  -1    3.53    0.26
  -7  -8  -1    0.49    0.24
  -6  -8  -1    0.36    0.25
  -5  -8  -1    0.27    0.24
  -4  -8  -1    0.67    0.24
  -3  -8  -1    0.35    0.24
  -2  -8  -1    0.12    0.17
   1  -8   0    0.59    0.24
   4  -8   1    0.17    0.23
   7  -8   3    0.64    0.26
  13  -8   9   -0.04    0.33
 -16  -9   3   -0.08    0.31
 -14  -9   2    0.38    0.29
 -12  -9   1    0.74    0.25
 -11  -9   1    2.07    0.29
  -8  -9   0   -0.10    0.24
  -7  -9   0    0.03    0.25
  -6  -9   0    0.71    0.25
  -5  -9   0    0.10    0.25
  -4  -9   0    0.34    0.25
  -3  -9   0    2.72    0.24
   0  -9   1    0.20    0.24
   1  -9   1    0.80    0.25
   3  -9   2    6.17    0.28
   5  -9   3    0.22    0.25
   8  -9   5    0.31    0.28
   9  -9   6    0.21    0.27
  10  -9   7    0.26    0.29
  11  -9   8    5.42    0.33
 -13 -10   3   -0.03    0.31
 -10 -10   2    0.43    0.30
  -9 -10   2   -0.23    0.27
  -2 -10   2    0.39    0.25
  -1 -10   2    0.30    0.26
   0 -10   2   -0.27    0.24
   2 -10   3    1.32    0.28
   4 -10   4    1.18    0.27
   6 -10   5    0.87    0.26
   7 -10   6   -0.10    0.28
   8 -10   7    0.56    0.32
   9 -10   8    0.01    0.33
  10 -10   9    4.72    0.39
  -6 -11   3    0.11    0.28
  -5 -11   3    0.05    0.27
  -1 -11   4    2.25    0.31
   0 -11   4    0.20    0.30
   2 -11   5   -0.05    0.30
   4 -11   6    0.10    0.31
 -12   7  21    0.30    0.32
 -11   7  20    5.20    0.33
 -10   7  19    0.13    0.30
  -9   7  19    0.86    0.30
  -8   7  18   -0.16    0.27
  -7   7  18    1.90    0.28
  -6   7  18    0.11    0.26
  -5   7  18    4.67    0.28
  -4   7  18    0.28    0.26
  -3   7  18    1.11    0.25
  -2   7  19    0.12    0.23
  -1   7  19    0.25    0.26
   0   7  20    0.15    0.27
   1   7  20    1.74    0.25
   1   7  21    0.32    0.27
   2   7  21   -0.11    0.26
   2   7  22    0.24    0.29
   3   7  23    2.77    0.30
   3   7  24    0.32    0.27
   4   7  24    0.29    0.27
   4   7  25    0.39    0.31
 -16   6  18    0.08    0.35
 -15   6  17   -0.17    0.30
 -14   6  16    0.74    0.29
 -13   6  15    0.22    0.28
 -11   6  14    0.06    0.25
  -9   6  13    0.33    0.25
  -8   6  13    5.40    0.27
  -7   6  13    0.94    0.25
  -6   6  13    4.85    0.20
  -5   6  13    0.31    0.18
  -4   6  13    1.73    0.23
  -3   6  13    0.26    0.24
  -2   6  13    9.41    0.28
   0   6  14    8.11    0.28
   2   6  15    3.12    0.26
   3   6  16   -0.17    0.24
   4   6  17    8.61    0.28
   5   6  18   -0.15    0.24
   6   6  19    1.42    0.27
   6   6  20    1.18    0.19
   7   6  21   -0.13    0.27
   8   6  23   -0.23    0.28
   8   6  24    3.40    0.29
 -19   5  17    3.71    0.34
 -17   5  14    5.36    0.35
 -16   5  13    0.10    0.30
 -13   5  11    0.90    0.25
 -11   5  10   53.68    0.48
  -8   5   9    0.04    0.26
  -7   5   9   12.04    0.30
  -6   5   9    1.63    0.25
  -5   5   9    6.48    0.27
  -4   5   9    0.84    0.24
  -3   5   9   11.36    0.29
   0   5  10    0.30    0.23
   2   5  11    0.57    0.25
   5   5  13   21.47    0.33
   6   5  14    0.52    0.25
   7   5  15    8.30    0.28
   9   5  18    6.45    0.27
  10   5  20    0.02    0.26
  11   5  22    1.01    0.31
  11   5  23    9.20    0.34
 -21   4  15   -0.30    0.39
 -20   4  14    2.79    0.36
 -15   4   9    0.05    0.28
 -13   4   8    0.18    0.24
 -11   4   7    0.09    0.29
  -7   4   6   -0.09    0.29
  -6   4   6   28.79    0.39
  -5   4   6    0.79    0.25
  -4   4   6   37.74    0.42
   0   4   7   76.22    0.53
   2   4   8    4.53    0.19
   4   4   9    2.44    0.25
  10   4  15   17.44    0.31
  11   4  17    0.44    0.25
  12   4  19    0.35    0.27
  13   4  21    0.03    0.27
  14   4  24    1.53    0.34
  14   4  25    2.17    0.35
 -22   3  13    0.07    0.41
 -14   3   6    0.28    0.30
 -12   3   5    0.12    0.29
  -8   3   4    1.36    0.25
  -3   3   4   54.42    0.52
   1   3   5   21.57    0.37
   5   3   7   64.61    0.53
  11   3  13    8.17    0.28
  13   3  16    6.13    0.32
  15   3  21    0.45    0.32
 -16   2   5    0.63    0.38
  -7   2   2    0.04    0.22
  -4   2   2   84.78    0.78
   1   2   3    5.16    0.33
   5   2   5    0.64    0.24
   9   2   8    0.14    0.27
  10   2   9   11.35    0.34
  13   2  13    0.51    0.30
  14   2  15   25.54    0.40
  15   2  17    0.13    0.24
  16   2  19    0.87    0.32
  17   2  23    0.19    0.36
  15   1  14    0.76    0.29
  16   1  16   -0.08    0.32
  18   1  22    0.07    0.36
   8   0   4    0.29    0.31
  13   0   9    0.21    0.30
  15   0  12    0.93    0.34
  17   0  16    0.71    0.35
  19   0  22    0.09    0.44
 -13  -1   0   24.44    0.54
 -10  -1  -1    0.57    0.27
 -18  -2   2    7.30    0.38
 -12  -2  -1   13.44    0.38
  -8  -2  -2   26.86    0.44
 -23  -3   6    4.31    0.44
 -22  -3   5    0.22    0.37
 -21  -3   4    5.20    0.35
 -17  -3   1   16.15    0.39
 -13  -3  -1    7.48    0.33
 -10  -3  -2    0.09    0.24
 -24  -4   7    3.98    0.43
 -20  -4   3    4.99    0.34
   0  -4  -2   12.25    0.31
   3  -4  -1    0.53    0.25
   5  -4   0    2.07    0.26
 -23  -5   6    5.77    0.44
 -22  -5   5    0.28    0.35
 -21  -5   4    1.36    0.37
 -20  -5   3   -0.15    0.28
 -17  -5   1    0.87    0.29
 -13  -5  -1    4.55    0.26
 -10  -5  -2    1.74    0.24
  -1  -5  -2   20.87    0.33
   0  -5  -2    1.04    0.17
   5  -5   0    4.05    0.26
   8  -5   2    0.31    0.23
  14  -5   8    0.08    0.30
  17  -5  13    5.46    0.45
 -18  -6   2    0.31    0.29
 -12  -6  -1   19.96    0.33
  -8  -6  -2   12.31    0.29
  -7  -6  -2    1.02    0.24
  -4  -6  -2    2.26    0.22
  -3  -6  -2    0.38    0.23
  -2  -6  -2    4.43    0.25
   2  -6  -1    3.19    0.24
   4  -6   0    0.07    0.23
   6  -6   1    3.12    0.25
  10  -6   4   27.19    0.41
  15  -6  10    0.14    0.30
  18  -6  16    0.07    0.46
 -17  -7   2    2.12    0.29
 -15  -7   1    2.94    0.30
 -13  -7   0    9.61    0.29
 -10  -7  -1   -0.23    0.25
  -1  -7  -1    1.43    0.24
   0  -7  -1    2.58    0.24
   3  -7   0    0.58    0.17
   5  -7   1    3.12    0.24
   8  -7   3    2.58    0.25
   9  -7   4    4.51    0.27
  12  -7   7    0.50    0.29
  15  -7  11   -0.10    0.35
  16  -7  13    0.06    0.38
  17  -7  15    0.33    0.41
 -17  -8   3   -0.19    0.30
 -15  -8   2    0.12    0.31
 -13  -8   1    0.34    0.25
 -11  -8   0    0.12    0.26
 -10  -8   0    6.02    0.29
   0  -8   0    2.07    0.24
   3  -8   1   -0.03    0.24
   5  -8   2    0.32    0.24
   8  -8   4    4.92    0.28
   9  -8   5    0.23    0.27
  10  -8   6    2.33    0.28
  11  -8   7    0.57    0.28
  12  -8   8    0.46    0.28
 -15  -9   3    0.16    0.32
 -13  -9   2    1.26    0.28
 -10  -9   1    0.19    0.27
  -9  -9   1    1.65    0.28
  -2  -9   1   -0.18    0.24
  -1  -9   1    1.29    0.26
   2  -9   2   -0.17    0.25
   4  -9   3    0.33    0.25
   6  -9   4    0.05    0.25
   7  -9   5    2.78    0.30
  12  -9  10    0.20    0.34
  13  -9  11    0.36    0.32
 -12 -10   3    0.77    0.27
 -11 -10   3   -0.17    0.30
  -8 -10   2    0.57    0.28
  -7 -10   2   -0.16    0.27
  -6 -10   2    0.32    0.28
  -5 -10   2    0.11    0.28
  -4 -10   2    0.39    0.28
  -3 -10   2    0.10    0.28
   0 -10   3    3.02    0.27
   1 -10   3    0.28    0.26
   3 -10   4    0.13    0.27
   5 -10   5    0.27    0.28
   6 -10   6    0.31    0.30
  -8 -11   4   -0.12    0.32
  -7 -11   4    1.38    0.31
  -6 -11   4   -0.34    0.32
  -5 -11   4    2.40    0.31
  -4 -11   4    0.18    0.31
  -3 -11   4    1.97    0.32
  -2 -11   4    0.14    0.30
   0 -11   5    0.41    0.28
   1 -11   5    0.31    0.31
   3 -11   6    5.35    0.33
   5 -11   7    0.64    0.33
 -13   7  20    5.40    0.35
 -12   7  19    0.23    0.31
 -12   7  20    0.32    0.27
 -11   7  19    1.86    0.30
 -10   7  18   -0.23    0.29
  -9   7  18    3.73    0.29
  -8   7  17    0.53    0.26
  -7   7  17    4.77    0.28
  -6   7  17    0.08    0.26
  -5   7  17    0.26    0.26
  -4   7  17    0.43    0.26
  -3   7  17    2.89    0.26
  -2   7  18    0.33    0.24
  -1   7  18    1.57    0.27
   0   7  19    0.86    0.24
   1   7  19    0.11    0.26
   2   7  20    0.12    0.27
   3   7  21    1.58    0.28
   3   7  22    5.70    0.29
   4   7  22    0.18    0.27
   4   7  23    0.30    0.31
   5   7  24    0.46    0.28
   5   7  25    0.38    0.32
 -16   6  17    2.81    0.35
 -15   6  16    0.03    0.30
 -14   6  15    0.59    0.32
 -12   6  14    2.04    0.28
 -10   6  13    1.70    0.26
  -7   6  12    0.14    0.24
  -6   6  12   22.29    0.34
  -5   6  12    0.20    0.25
  -4   6  12    5.21    0.27
  -3   6  12    1.98    0.23
  -1   6  13    0.42    0.25
   0   6  13    0.35    0.22
   1   6  14    0.56    0.23
   3   6  15    0.04    0.25
   4   6  16    1.56    0.24
   5   6  17   -0.04    0.25
   6   6  18   -0.03    0.25
   7   6  20    0.20    0.27
   8   6  21    1.60    0.25
   8   6  22    5.87    0.29
   9   6  24   -0.12    0.31
   9   6  25   -0.08    0.29
 -19   5  16    0.91    0.40
 -18   5  15    0.26    0.30
 -15   5  12    4.75    0.28
 -12   5  10    0.31    0.29
  -9   5   9   57.55    0.48
  -2   5   9    2.01    0.25
  -1   5   9   26.45    0.34
   1   5  10    5.54    0.26
   3   5  11   34.88    0.38
   4   5  12    0.93    0.18
   8   5  16    0.34    0.25
   9   5  17    9.66    0.29
  10   5  19    0.31    0.25
  11   5  21    0.78    0.29
  12   5  24    0.19    0.31
  12   5  25   -0.20    0.31
  -8   4   6    7.65    0.28
  -3   4   6    1.59    0.25
  -2   4   6   55.45    0.48
   1   4   7    2.93    0.25
   3   4   8    0.67    0.24
   6   4  10    2.93    0.25
   7   4  11    0.44    0.24
   8   4  12    0.22    0.24
   9   4  13   -0.04    0.23
  11   4  16    0.08    0.25
  12   4  18    2.00    0.27
  13   4  20    0.21    0.27
  14   4  23    8.45    0.36
 -16   3   7    0.05    0.27
  -9   3   4   26.31    0.43
  -2   3   4    0.95    0.18
   8   3   9    0.06    0.27
   9   3  10    1.41    0.28
  12   3  14   -0.19    0.25
  14   3  18    0.07    0.27
  15   3  20    1.14    0.34
  16   3  23    0.13    0.36
  16   3  24    0.20    0.33
 -12   2   3    0.01    0.30
  -8   2   2   27.27    0.53
  -3   2   2    2.26    0.30
   8   2   7  175.78    0.89
  11   2  10    0.29    0.23
  17   2  22   -0.06    0.32
  10   1   7    0.31    0.26
  11   1   8    4.28    0.28
  14   1  12    0.22    0.28
  17   1  18    6.23    0.38
  18   1  21    0.38    0.35
   5   0   2    0.55    0.42
  18   0  18    1.99    0.39
  19   0  21    0.05    0.42
 -15  -1   1   18.14    0.53
  14  -1   9    0.07    0.43
  17  -1  14    3.47    0.45
  19  -1  19    0.19    0.44
  -7  -2  -2    0.07    0.22
  -6  -2  -2   49.99    0.56
  -5  -2  -2    0.43    0.28
  -4  -2  -2   87.40    0.72
  -3  -2  -2    2.43    0.22
 -15  -3   0   17.67    0.40
  -9  -3  -2   19.58    0.36
  -1  -3  -2   74.65    0.60
  17  -3  13    2.17    0.68
 -23  -4   6   -0.12    0.35
 -22  -4   5    3.36    0.35
 -21  -4   4    0.39    0.32
 -17  -4   1    0.65    0.25
 -15  -4   0    2.45    0.31
 -13  -4  -1    1.29    0.25
 -10  -4  -2   16.50    0.33
  -9  -4  -2    0.17    0.27
  -1  -4  -2    2.40    0.25
  14  -4   8    6.45    0.39
  16  -4  11    2.93    0.44
  18  -4  15    6.17    0.66
 -18  -5   2    0.00    0.31
 -15  -5   0    2.27    0.26
  -9  -5  -2   18.02    0.33
  -8  -5  -2    0.51    0.23
  -2  -5  -2    0.75    0.23
   2  -5  -1    1.64    0.24
   9  -5   3    4.86    0.30
  13  -5   7    7.72    0.35
 -20  -6   4    2.58    0.33
 -19  -6   3    0.15    0.29
 -16  -6   1   14.30    0.34
 -14  -6   0    0.92    0.25
 -11  -6  -1    0.43    0.23
  -6  -6  -2   17.23    0.27
  -5  -6  -2    0.53    0.18
   1  -6  -1    0.44    0.23
   7  -6   2    0.99    0.23
  14  -6   9    0.99    0.34
  16  -6  12    0.26    0.38
  17  -6  14    0.02    0.41
 -19  -7   4    0.45    0.33
 -18  -7   3   -0.15    0.31
 -12  -7   0    0.56    0.26
  -9  -7  -1    1.00    0.23
  -8  -7  -1    0.44    0.25
  -7  -7  -1    2.64    0.25
  -4  -7  -1    2.11    0.24
  -3  -7  -1    6.20    0.28
  -2  -7  -1    0.24    0.23
   2  -7   0    0.00    0.23
   4  -7   1    2.46    0.25
   6  -7   2    0.22    0.23
  10  -7   5    1.26    0.25
  11  -7   6    0.73    0.27
 -18  -8   4    4.61    0.34
 -16  -8   3    0.90    0.31
 -12  -8   1    0.28    0.26
  -9  -8   0    0.34    0.24
  -8  -8   0   -0.19    0.24
  -7  -8   0    0.14    0.22
  -3  -8   0    0.03    0.24
  -2  -8   0    1.07    0.25
  -1  -8   0    0.09    0.17
   2  -8   1   -0.06    0.24
   4  -8   2    1.45    0.25
   6  -8   3    1.96    0.25
   7  -8   4    0.54    0.28
  13  -8  10    0.30    0.33
 -16  -9   4    0.29    0.31
 -14  -9   3   -0.41    0.30
 -12  -9   2    0.18    0.25
 -11  -9   2    1.07    0.26
  -8  -9   1    0.09    0.24
  -7  -9   1    3.23    0.28
  -6  -9   1    0.38    0.27
  -5  -9   1    0.90    0.25
  -4  -9   1    0.35    0.26
  -3  -9   1    3.21    0.26
   1  -9   2    3.65    0.26
   3  -9   3    4.61    0.25
   5  -9   4    3.99    0.26
   8  -9   6    0.40    0.26
   9  -9   7    9.19    0.32
  10  -9   8    0.39    0.30
  11  -9   9    1.35    0.31
  13  -9  12    1.13    0.38
 -12 -10   4    0.38    0.27
 -10 -10   3    3.58    0.31
  -9 -10   3    0.52    0.30
  -2 -10   3    1.41    0.25
  -1 -10   3    0.20    0.26
   2 -10   4    1.94    0.29
   4 -10   5    5.05    0.30
   7 -10   7   -0.09    0.28
   8 -10   8    0.24    0.30
   9 -10   9    0.20    0.33
  10 -10  10    0.74    0.33
  -2 -11   5    0.44    0.28
  -1 -11   5    0.86    0.32
   2 -11   6    0.64    0.30
   4 -11   7   -0.11    0.32
   5 -11   8    0.16    0.33
  -5   8  23    0.00    0.32
  -4   8  23    0.34    0.33
  -3   8  23   -0.12    0.29
 -13   7  19    1.61    0.32
 -12   7  18   -0.12    0.31
 -11   7  18    1.37    0.29
 -10   7  17    0.27    0.29
  -9   7  17    0.62    0.28
  -8   7  16    0.15    0.24
  -7   7  16    4.64    0.28
  -6   7  16   -0.11    0.27
  -5   7  16    2.56    0.29
  -4   7  16    0.07    0.25
  -3   7  16    1.99    0.26
  -2   7  17    0.53    0.23
  -1   7  17    3.66    0.28
   0   7  18    0.17    0.18
   1   7  18    1.12    0.25
   2   7  19   -0.08    0.27
   3   7  20   -0.02    0.27
   4   7  21    0.13    0.27
   5   7  22    1.13    0.27
   5   7  23    4.32    0.32
   6   7  24    0.04    0.28
   6   7  25   -0.12    0.33
 -17   6  18    0.36    0.34
 -13   6  14    0.21    0.27
 -12   6  13    3.13    0.32
 -11   6  13    0.02    0.25
  -9   6  12    0.23    0.24
  -8   6  12    9.16    0.27
  -2   6  12   16.65    0.32
  -1   6  12    1.00    0.25
   1   6  13    0.58    0.25
   2   6  14    4.11    0.20
   4   6  15   10.21    0.29
   5   6  16   -0.10    0.25
   6   6  17    0.82    0.24
   7   6  19   -0.19    0.26
   8   6  20    0.53    0.27
   9   6  22   -0.17    0.29
   9   6  23   -0.14    0.26
  10   6  25   -0.07    0.33
 -17   5  13    5.00    0.34
 -14   5  11    0.43    0.26
 -13   5  10    2.27    0.30
 -10   5   9    1.39    0.25
  -6   5   8    0.80    0.24
  -5   5   8   11.57    0.30
   0   5   9    0.46    0.23
   2   5  10    0.50    0.25
   4   5  11    0.44    0.24
   5   5  12    1.86    0.24
   6   5  13    0.58    0.23
   7   5  14    2.02    0.25
   8   5  15    0.28    0.25
  10   5  18    0.22    0.24
  11   5  20    1.01    0.28
  12   5  22   -0.08    0.31
  12   5  23    0.10    0.30
 -20   4  13    1.09    0.38
 -19   4  12   -0.10    0.34
 -18   4  11    2.20    0.33
 -17   4  10   -0.09    0.31
 -14   4   8    6.31    0.29
 -12   4   7    2.84    0.28
  -9   4   6    0.27    0.23
  -1   4   6    2.33    0.25
   5   4   9    0.27    0.24
  10   4  14    4.29    0.25
  12   4  17    5.14    0.28
  13   4  19   -0.08    0.28
  14   4  22    0.01    0.32
 -13   3   5    3.30    0.33
 -10   3   4    0.40    0.27
  -1   3   4   26.81    0.36
   2   3   5    0.13    0.23
   4   3   6    1.57    0.24
   7   3   8   18.06    0.34
  10   3  11    0.02    0.23
  11   3  12   52.26    0.50
  13   3  15    0.16    0.27
  14   3  17    0.02    0.26
  15   3  19    0.95    0.33
  16   3  22   -0.26    0.35
 -21   2   9    0.11    0.47
 -20   2   8    0.19    0.42
 -19   2   7    0.16    0.44
  -9   2   2    0.53    0.30
  -2   2   2  866.76    2.32
   4   2   4   12.53    0.34
   7   2   6    1.73    0.25
  12   2  11   14.45    0.35
  14   2  14    3.69    0.30
  15   2  16    0.08    0.24
  16   2  18    2.90    0.34
  17   2  21   -0.45    0.34
   9   1   6   44.35    0.56
  12   1   9   -0.01    0.27
 -13   0   1    0.30    0.44
 -10   0   0   83.52    1.36
   3   0   1    0.00    0.42
  -9  -1  -1   54.63    0.73
  16  -1  12    0.13    0.41
  18  -1  16    0.06    0.41
 -24  -2   8    0.71    0.46
 -19  -2   3    1.04    0.30
 -16  -2   1    4.10    0.31
 -14  -2   0   50.48    0.60
   1  -2  -1    2.23    0.33
 -18  -3   2    0.89    0.30
 -12  -3  -1    0.57    0.29
  -8  -3  -2    0.25    0.24
  -2  -3  -2    0.59    0.25
   2  -3  -1    0.65    0.23
   9  -3   3    8.29    0.35
 -18  -4   2    8.18    0.35
 -12  -4  -1    3.03    0.28
  -8  -4  -2   88.39    0.58
  -2  -4  -2   32.85    0.40
   2  -4  -1   73.00    0.56
  17  -4  13    0.04    0.47
 -19  -5   3    0.64    0.32
 -16  -5   1    0.27    0.29
 -14  -5   0    1.44    0.30
 -12  -5  -1    0.95    0.24
  -7  -5  -2   22.55    0.34
  -6  -5  -2    0.73    0.24
  -5  -5  -2   10.93    0.29
  -4  -5  -2    0.44    0.24
  -3  -5  -2    4.53    0.25
   1  -5  -1   61.05    0.49
   4  -5   0    0.14    0.23
   6  -5   1    0.82    0.25
  12  -5   6    0.22    0.29
  15  -5  10   10.56    0.42
 -21  -6   5    0.35    0.32
 -17  -6   2   -0.31    0.28
 -15  -6   1    0.55    0.29
 -13  -6   0    0.36    0.23
 -10  -6  -1    2.76    0.25
  -1  -6  -1    0.72    0.21
   0  -6  -1    3.38    0.23
   3  -6   0    0.16    0.23
   5  -6   1    0.81    0.25
   8  -6   3    2.36    0.25
 -20  -7   5    0.40    0.32
 -17  -7   3    0.32    0.30
 -16  -7   2    0.02    0.27
 -14  -7   1    0.66    0.25
 -11  -7   0   22.81    0.34
  -6  -7  -1    0.24    0.18
  -5  -7  -1    2.68    0.20
   1  -7   0   14.08    0.29
   3  -7   1    5.34    0.25
   5  -7   2   19.06    0.34
   7  -7   3    8.95    0.28
 -17  -8   4   -0.10    0.30
 -14  -8   2    3.83    0.28
 -11  -8   1   -0.22    0.26
  -6  -8   0    1.35    0.23
  -5  -8   0    0.45    0.22
  -4  -8   0    2.34    0.18
   0  -8   1    0.33    0.22
   1  -8   1    0.26    0.22
   3  -8   2    0.01    0.24
   5  -8   3    0.17    0.25
   8  -8   5    5.64    0.28
   9  -8   6    0.61    0.29
  11  -8   8    0.21    0.33
  12  -8   9    0.48    0.32
 -15  -9   4    0.72    0.33
 -13  -9   3    4.24    0.30
 -10  -9   2    0.02    0.26
  -9  -9   2    0.43    0.24
  -1  -9   2    4.22    0.27
   0  -9   2    0.02    0.23
   2  -9   3    0.31    0.25
   4  -9   4    0.08    0.23
   6  -9   5    0.10    0.27
  12  -9  11    0.57    0.33
 -11 -10   4   -0.10    0.31
 -10 -10   4    4.41    0.29
  -8 -10   3    0.28    0.22
  -7 -10   3    0.14    0.27
  -6 -10   3    3.58    0.29
  -5 -10   3    0.13    0.28
  -4 -10   3    1.91    0.28
  -3 -10   3    0.05    0.25
   0 -10   4    0.08    0.27
   1 -10   4    0.34    0.24
   3 -10   5    0.01    0.27
   5 -10   6   -0.12    0.29
   6 -10   7    0.41    0.29
  -7 -11   5    1.36    0.28
  -6 -11   5    0.29    0.32
  -5 -11   5   -0.25    0.31
  -3 -11   5    1.37    0.28
   0 -11   6    0.16    0.31
   1 -11   6    3.48    0.30
   2 -11   7    0.20    0.28
   3 -11   7    1.27    0.28
   4 -11   8   -0.04    0.32
  -7   8  22    0.02    0.31
  -6   8  21    0.00    0.27
  -6   8  22   -0.11    0.30
  -5   8  21    0.44    0.27
  -5   8  22   -0.05    0.31
  -4   8  22    0.26    0.30
  -3   8  22    0.02    0.31
  -2   8  22   -0.02    0.31
  -2   8  23   -0.11    0.32
  -1   8  23   -0.13    0.31
 -14   7  19    0.04    0.32
 -13   7  18    2.36    0.32
 -11   7  17    0.53    0.30
 -10   7  16    0.10    0.26
  -9   7  16    1.01    0.27
  -7   7  15    7.51    0.27
  -6   7  15   -0.11    0.25
  -5   7  15    4.66    0.27
  -4   7  15    0.62    0.25
  -2   7  16   -0.05    0.23
  -1   7  16    1.64    0.27
   0   7  17    0.44    0.19
   1   7  17    3.59    0.27
   2   7  18   -0.05    0.27
   3   7  19    1.14    0.27
   4   7  20    0.27    0.28
   5   7  21    1.43    0.28
   6   7  23    0.65    0.30
   7   7  25    5.58    0.34
 -17   6  17    0.32    0.32
 -16   6  16    0.20    0.30
 -15   6  15    0.02    0.28
 -14   6  14    0.98    0.28
 -11   6  12    0.00    0.28
 -10   6  12    1.64    0.26
  -8   6  11    8.95    0.30
  -7   6  11    0.22    0.23
  -6   6  11    5.09    0.26
  -5   6  11    0.21    0.24
  -4   6  11   32.60    0.37
  -3   6  11    0.78    0.24
   0   6  12    3.84    0.26
   2   6  13    8.98    0.29
   3   6  14    0.17    0.17
   5   6  15    0.26    0.23
   6   6  16    2.53    0.24
   7   6  18    0.25    0.24
   8   6  19    0.06    0.27
   9   6  21   -0.09    0.28
  10   6  23    0.44    0.31
  10   6  24    0.69    0.33
 -19   5  15    4.24    0.39
 -18   5  14    0.34    0.29
 -16   5  12    0.05    0.27
 -15   5  11    3.32    0.30
 -11   5   9    1.11    0.26
  -8   5   8    0.14    0.24
  -7   5   8   11.71    0.31
  -4   5   8    0.72    0.17
  -3   5   8   38.90    0.40
  -2   5   8    1.74    0.24
   1   5   9   26.53    0.35
   3   5  10   32.70    0.37
   7   5  13    2.52    0.24
   9   5  16   11.44    0.28
  10   5  17    0.10    0.25
  11   5  19    1.93    0.27
  12   5  21    0.24    0.28
  13   5  24    3.94    0.34
 -21   4  14    0.15    0.40
 -16   4   9    2.80    0.32
 -13   4   7    0.01    0.30
 -10   4   6    2.69    0.25
   0   4   6    1.75    0.24
   2   4   7    7.20    0.22
   4   4   8   21.88    0.34
   7   4  10    0.61    0.24
   8   4  11    8.08    0.28
   9   4  12    0.42    0.23
  11   4  15    0.08    0.23
  12   4  16    7.88    0.34
  13   4  18   -0.16    0.32
  14   4  21   -0.04    0.30
  15   4  24   -0.09    0.33
 -21   3  11    0.27    0.41
 -20   3  10    0.28    0.35
 -19   3   9    0.69    0.33
 -18   3   8    0.02    0.32
 -15   3   6   13.63    0.39
   0   3   4    0.82    0.24
   6   3   7    0.96    0.24
  12   3  13   -0.12    0.25
  16   3  21    0.06    0.34
 -22   2  10    2.54    0.54
   2   2   3  766.60    2.02
   6   2   5   11.78    0.36
  13   2  12    0.84    0.30
  17   2  20    0.23    0.34
   5   1   3   37.18    0.61
   8   1   5    1.02    0.29
  13   1  10    3.00    0.31
  15   1  13   30.32    0.48
  16   1  15    0.31    0.31
  17   1  17    0.55    0.32
  18   1  20    0.30    0.34
 -24   0  10    4.47    0.80
  14   0  10    1.39    0.33
  16   0  13    7.49    0.44
  17   0  15    0.55    0.33
  19   0  20    0.23    0.42
 -18  -1   3   -0.02    0.35
 -23  -2   7    0.03    0.40
 -22  -2   6    0.93    0.40
 -21  -2   5    0.22    0.37
 -20  -2   4   14.85    0.47
 -11  -2  -1    0.56    0.23
 -24  -3   8   -0.04    0.44
 -19  -3   3    1.72    0.32
 -16  -3   1    0.49    0.29
 -14  -3   0    1.19    0.31
  -7  -3  -2   52.21    0.50
  -6  -3  -2    0.49    0.24
  -5  -3  -2    0.26    0.22
  -4  -3  -2    0.36    0.24
  -3  -3  -2    6.60    0.22
   4  -3   0    1.19    0.23
  10  -3   4    0.46    0.29
  13  -3   7   17.78    0.57
 -19  -4   3    0.22    0.31
 -16  -4   1    0.66    0.28
 -14  -4   0   12.14    0.36
  -7  -4  -2    1.64    0.25
  -6  -4  -2  109.96    0.64
  -5  -4  -2    0.44    0.26
  -4  -4  -2  107.28    0.63
  -3  -4  -2    0.80    0.18
   4  -4   0    5.02    0.28
   6  -4   1   33.69    0.44
  12  -4   6   21.73    0.47
  13  -4   7    0.17    0.29
 -23  -5   7    1.90    0.39
 -22  -5   6    0.13    0.37
 -21  -5   5    0.90    0.37
 -20  -5   4    0.34    0.29
 -11  -5  -1    8.32    0.27
   7  -5   2   23.96    0.37
 -19  -6   4    0.23    0.33
 -18  -6   3    0.50    0.28
 -12  -6   0    3.90    0.25
  -9  -6  -1    0.74    0.23
  -8  -6  -1    0.36    0.24
  -3  -6  -1    0.02    0.21
  -2  -6  -1    3.94    0.25
   2  -6   0    0.28    0.23
   6  -6   2   17.58    0.33
   9  -6   4    1.54    0.27
  10  -6   5    1.72    0.31
  15  -6  11   -0.09    0.34
 -18  -7   4    0.15    0.31
 -15  -7   2    1.22    0.27
 -13  -7   1    1.28    0.25
 -10  -7   0    0.26    0.24
  -9  -7   0    1.47    0.25
  -1  -7   0   14.10    0.30
   0  -7   0    1.64    0.19
   8  -7   4    0.58    0.24
   9  -7   5    5.48    0.28
  10  -7   6    0.22    0.28
  11  -7   7    7.16    0.33
  12  -7   8   -0.01    0.28
  15  -7  12    0.18    0.32
  16  -7  14    0.15    0.38
 -18  -8   5    1.48    0.33
 -16  -8   4    1.21    0.31
 -15  -8   3   -0.01    0.29
 -13  -8   2    0.05    0.24
 -12  -8   2    1.21    0.24
 -10  -8   1    5.63    0.27
  -9  -8   1    0.04    0.24
  -2  -8   1    0.05    0.22
  -1  -8   1    0.28    0.24
   2  -8   2    1.46    0.25
   4  -8   3    4.21    0.29
   6  -8   4    4.55    0.27
  10  -8   7   10.03    0.33
 -16  -9   5    0.05    0.30
 -14  -9   4    0.14    0.32
 -12  -9   3    0.16    0.25
 -11  -9   3    1.86    0.29
  -8  -9   2    0.18    0.26
  -7  -9   2    5.09    0.29
  -6  -9   2    0.16    0.25
  -5  -9   2    0.59    0.25
  -4  -9   2   -0.09    0.26
  -3  -9   2    6.18    0.28
  -2  -9   2   -0.15    0.24
   1  -9   3    8.61    0.29
   3  -9   4   11.55    0.33
   5  -9   5    1.02    0.24
   7  -9   6    0.56    0.26
   8  -9   7    0.38    0.28
   9  -9   8    0.05    0.27
  10  -9   9    0.03    0.31
  11  -9  10    9.46    0.36
 -12 -10   5   -0.11    0.31
  -9 -10   4    0.21    0.30
  -8 -10   4    0.20    0.30
  -7 -10   4    0.16    0.26
  -3 -10   4    0.35    0.24
  -2 -10   4    1.62    0.30
  -1 -10   4    0.02    0.27
   1 -10   5    0.78    0.29
   2 -10   5    3.28    0.30
   4 -10   6    6.38    0.30
   5 -10   7    0.44    0.31
   7 -10   8   -0.07    0.29
   8 -10   9    1.07    0.31
   9 -10  10    0.15    0.33
  -6 -11   6    0.11    0.28
  -5 -11   6    0.16    0.29
  -3 -11   6    6.31    0.33
  -2 -11   6    0.41    0.31
  -1 -11   6    3.08    0.31
   1 -11   7    0.31    0.32
   3 -11   8    0.54    0.32
  -9   8  21   -0.15    0.33
  -8   8  21    0.15    0.32
  -7   8  20   -0.19    0.26
  -7   8  21    0.14    0.27
  -6   8  20    3.07    0.31
  -5   8  20   -0.15    0.29
  -4   8  20    0.53    0.29
  -4   8  21    0.38    0.25
  -3   8  20    0.08    0.26
  -3   8  21    0.21    0.27
  -2   8  21    0.57    0.31
  -1   8  21    0.17    0.29
  -1   8  22    0.28    0.27
   0   8  22   -0.23    0.30
   0   8  23    0.01    0.24
   1   8  23   -0.15    0.31
 -14   7  18    0.13    0.33
 -13   7  17    2.62    0.33
 -12   7  17   -0.06    0.26
 -11   7  16    0.62    0.28
  -9   7  15    1.87    0.26
  -8   7  15    0.29    0.24
  -3   7  15    7.68    0.23
  -2   7  15    1.16    0.25
  -1   7  15   29.44    0.36
   0   7  16   -0.44    0.24
   1   7  16    1.92    0.26
   2   7  17    0.28    0.25
   3   7  18    1.00    0.26
   4   7  19   -0.15    0.26
   5   7  20    0.02    0.26
   6   7  21    0.33    0.28
   6   7  22   -0.15    0.27
   7   7  23    0.00    0.30
   7   7  24    0.04    0.28
 -17   6  16   -0.09    0.36
 -16   6  15    0.24    0.34
 -15   6  14    0.09    0.34
 -13   6  13    0.41    0.27
 -12   6  12    1.99    0.29
  -9   6  11    0.00    0.22
  -2   6  11    4.03    0.24
  -1   6  11    0.95    0.24
   1   6  12    0.99    0.25
   3   6  13    0.41    0.25
   4   6  14    5.10    0.25
   7   6  17    0.36    0.25
   8   6  18    9.29    0.30
   9   6  20   -0.15    0.27
  10   6  22    2.92    0.32
  11   6  24    0.05    0.28
 -14   5  10    0.21    0.28
 -12   5   9    0.18    0.25
 -10   5   8    0.15    0.27
  -9   5   8    5.72    0.27
  -1   5   8   25.34    0.34
   2   5   9    2.19    0.24
   5   5  11    5.18    0.26
   6   5  12    0.40    0.22
   8   5  14    0.12    0.22
   9   5  15    6.73    0.28
  11   5  18    0.80    0.25
  12   5  20   -0.04    0.28
  13   5  22    4.22    0.33
  13   5  23   -0.06    0.31
 -15   4   8    0.12    0.27
 -11   4   6    0.00    0.24
  -7   4   5   -0.12    0.27
  -6   4   5   19.71    0.36
  -5   4   5    2.66    0.26
  -4   4   5   54.50    0.49
   1   4   6    2.23    0.23
   3   4   7    0.42    0.24
   6   4   9   13.42    0.31
  10   4  13   22.18    0.33
  11   4  14    0.68    0.22
  14   4  20    0.99    0.28
  15   4  22   -0.22    0.36
  15   4  23    0.11    0.31
 -22   3  12    0.08    0.43
 -11   3   4    9.25    0.34
  -5   3   3    6.19    0.32
   3   3   5    1.95    0.25
   5   3   6  178.68    0.82
   9   3   9    3.32    0.28
  10   3  10    0.01    0.27
  13   3  14    8.77    0.33
  14   3  16   -0.23    0.26
  15   3  18    4.37    0.29
  16   3  20    0.38    0.34
 -18   2   6    1.33    0.46
  -1   2   2    4.89    0.35
  14   2  13   15.62    0.38
  15   2  15    0.64    0.30
  16   2  17    1.67    0.32
  18   2  23    0.51    0.37
   3   1   2  151.65    1.21
  18   1  19    0.32    0.36
 -15   0   2    0.19    0.44
  18   0  17    1.07    0.38
 -24  -1   9    0.03    0.51
 -12  -1   0    0.77    0.30
  -8  -1  -1    0.09    0.31
  19  -1  18    8.46    0.56
 -17  -2   2    1.02    0.31
   7  -2   2    0.03    0.31
  20  -2  20    0.68    0.69
 -23  -3   7    2.69    0.44
 -20  -3   4    0.13    0.29
 -11  -3  -1   36.53    0.44
   1  -3  -1  214.05    0.99
  11  -3   5    7.63    0.40
  12  -3   6    0.28    0.34
 -23  -4   7   -0.07    0.37
 -22  -4   6    2.67    0.35
 -21  -4   5    0.12    0.32
 -20  -4   4    0.10    0.31
 -11  -4  -1    1.51    0.24
   1  -4  -1    0.78    0.25
  11  -4   5    0.08    0.27
 -17  -5   2    3.72    0.28
 -15  -5   1    9.25    0.30
 -13  -5   0   20.62    0.34
 -10  -5  -1    1.03    0.24
  -9  -5  -1   32.61    0.38
  -1  -5  -1   63.64    0.48
   0  -5  -1    0.68    0.17
   3  -5   0    7.53    0.28
   5  -5   1   38.76    0.43
   8  -5   3    0.07    0.26
  14  -5   9    0.26    0.33
  16  -5  12    0.10    0.36
  18  -5  16    0.17    0.47
 -21  -6   6   -0.10    0.36
 -20  -6   5   -0.03    0.31
 -16  -6   2    3.36    0.29
 -14  -6   1   10.49    0.30
 -11  -6   0    0.35    0.23
  -7  -6  -1    0.17    0.17
  -6  -6  -1    3.38    0.24
  -5  -6  -1    1.01    0.24
  -4  -6  -1    3.72    0.24
   1  -6   0    0.38    0.23
   4  -6   1    3.23    0.24
  16  -6  13    1.36    0.39
  17  -6  15    0.02    0.44
 -20  -7   6    0.14    0.32
 -19  -7   5    0.40    0.32
 -16  -7   3    0.38    0.27
 -14  -7   2    0.42    0.25
 -12  -7   1    0.08    0.24
  -8  -7   0    0.53    0.24
  -7  -7   0    0.18    0.24
  -6  -7   0    0.01    0.25
  -5  -7   0   16.84    0.31
  -4  -7   0    0.78    0.25
  -3  -7   0    1.06    0.25
  -2  -7   0    0.37    0.23
   2  -7   1    0.29    0.22
   4  -7   2    1.62    0.26
   6  -7   3    0.14    0.23
 -17  -8   5    0.35    0.29
 -14  -8   3    4.16    0.30
 -11  -8   2   -0.52    0.27
  -8  -8   1    3.16    0.20
  -7  -8   1    0.23    0.24
  -6  -8   1    0.50    0.25
  -5  -8   1    0.28    0.24
  -4  -8   1    0.37    0.23
  -3  -8   1   -0.23    0.24
   1  -8   2    0.15    0.24
   7  -8   5    0.61    0.26
   8  -8   6    5.51    0.33
  12  -8  10    0.65    0.32
  13  -8  11    0.05    0.31
 -15  -9   5    3.38    0.34
 -13  -9   4    1.36    0.28
 -12  -9   4   -0.22    0.30
 -10  -9   3    0.47    0.27
  -9  -9   3    0.40    0.27
  -1  -9   3    8.88    0.29
   0  -9   3    0.39    0.26
   2  -9   4    0.15    0.25
   6  -9   6   -0.13    0.26
  12  -9  12    0.39    0.36
 -11 -10   5    0.10    0.28
 -10 -10   5    0.93    0.31
  -6 -10   4    0.12    0.25
  -5 -10   4   -0.12    0.25
  -4 -10   4    1.25    0.26
   0 -10   5    7.98    0.31
   3 -10   6    0.62    0.27
   6 -10   8    0.65    0.30
   7 -10   9    0.69    0.33
   8 -10  10    2.65    0.35
   9 -10  11    0.35    0.34
  -2 -11   7    0.17    0.29
  -1 -11   7   -0.12    0.33
   0 -11   7    0.31    0.27
   2 -11   8    0.28    0.31
   4 -11   9   -0.16    0.33
 -10   8  20    4.63    0.30
  -9   8  20   -0.23    0.32
  -8   8  19    1.79    0.28
  -8   8  20    2.34    0.28
  -7   8  19   -0.06    0.28
  -6   8  19    0.29    0.29
  -5   8  19   -0.38    0.28
  -4   8  19    0.80    0.29
  -3   8  19    0.37    0.28
  -2   8  19    1.08    0.26
  -2   8  20    0.59    0.27
  -1   8  20   -0.14    0.27
   0   8  20    0.26    0.26
   0   8  21    0.10    0.29
   1   8  21    0.20    0.29
   1   8  22   -0.12    0.27
   2   8  22    0.32    0.31
   2   8  23   -0.03    0.28
   3   8  23    0.05    0.28
 -15   7  18    0.24    0.33
 -14   7  17   -0.15    0.34
 -12   7  16   -0.03    0.28
 -11   7  15    4.94    0.30
 -10   7  15    0.20    0.27
  -9   7  14    1.01    0.27
  -8   7  14    0.10    0.24
  -7   7  14    3.27    0.26
  -6   7  14    0.15    0.23
  -5   7  14    4.61    0.25
  -4   7  14    0.90    0.23
  -3   7  14   10.73    0.29
  -2   7  14    0.54    0.25
   0   7  15    0.33    0.25
   1   7  15   29.55    0.35
   2   7  16   -0.26    0.26
   3   7  17    3.18    0.27
   4   7  18    0.26    0.23
   5   7  19    1.54    0.27
   6   7  20    0.37    0.28
   7   7  21    0.50    0.26
   7   7  22    0.59    0.30
   8   7  23    0.14    0.27
   8   7  24    0.44    0.31
 -18   6  17    0.62    0.35
 -14   6  13    0.81    0.27
 -13   6  12    0.09    0.30
 -11   6  11    0.27    0.27
 -10   6  11    4.27    0.26
  -7   6  10    0.59    0.24
  -6   6  10    9.83    0.28
  -5   6  10   -0.03    0.24
  -4   6  10   15.67    0.31
  -3   6  10    1.17    0.24
   0   6  11   17.95    0.32
   2   6  12   17.05    0.30
   4   6  13    1.87    0.25
   5   6  14    0.48    0.25
   6   6  15    4.01    0.27
   7   6  16    0.14    0.25
   8   6  17    2.73    0.26
   9   6  19    0.46    0.27
  10   6  20    0.15    0.30
  10   6  21    1.40    0.27
  11   6  23    0.25    0.32
 -20   5  15    0.04    0.36
 -19   5  14    7.00    0.38
 -18   5  13    0.11    0.29
 -17   5  12    6.04    0.31
 -16   5  11   -0.20    0.32
 -13   5   9    7.74    0.33
 -11   5   8    2.32    0.30
  -7   5   7   27.67    0.40
  -6   5   7    0.78    0.25
  -5   5   7   25.85    0.36
  -4   5   7    0.63    0.24
   0   5   8    0.04    0.23
   3   5   9   11.33    0.28
   4   5  10    0.91    0.17
   7   5  12    5.71    0.26
   8   5  13    0.34    0.23
  10   5  16    0.25    0.23
  11   5  17    2.62    0.27
  12   5  19    0.30    0.27
  13   5  21    2.07    0.31
  14   5  24    0.21    0.34
 -20   4  12    7.84    0.42
 -19   4  11    0.09    0.35
 -18   4  10    3.28    0.34
 -17   4   9    0.20    0.32
 -14   4   7    3.15    0.31
  -8   4   5    9.86    0.30
  -3   4   5    1.16    0.19
  -2   4   5   97.92    0.61
   5   4   8    0.81    0.17
   8   4  10   21.43    0.37
   9   4  11    0.13    0.26
  12   4  15    0.10    0.25
  13   4  17    0.15    0.28
  14   4  19    4.27    0.30
  15   4  21    0.20    0.31
 -17   3   7    2.36    0.35
 -14   3   5    0.67    0.31
  -7   3   3   12.88    0.35
  -6   3   3    0.47    0.24
  -4   3   3    0.23    0.21
  -3   3   3   28.72    0.42
   1   3   4   27.04    0.37
   7   3   7    8.14    0.32
   8   3   8    0.49    0.24
  11   3  11    8.60    0.29
  12   3  12    0.67    0.30
  15   3  17    3.14    0.32
  17   3  23   13.68    0.42
 -23   2  11   -0.01    0.62
 -15   2   4    0.14    0.37
 -13   2   3    0.13    0.34
 -10   2   2    3.11    0.34
   9   2   7    1.34    0.25
  10   2   8   19.87    0.37
  11   2   9    0.80    0.24
  12   2  10   11.93    0.36
  17   2  19    0.22    0.27
  18   2  22    3.32    0.40
   7   1   4   35.11    0.56
  14   1  11   -0.07    0.27
  19   1  22    0.54    0.39
  15   0  11    0.23    0.33
 -19  -1   4   14.18    0.52
  -2  -1  -1    0.10    0.25
  20  -1  21    0.00    0.47
 -15  -2   1    1.50    0.34
 -13  -2   0    0.10    0.28
 -10  -2  -1    3.77    0.27
   0  -2  -1   44.38    0.60
   3  -2   0    1.40    0.33
 -22  -3   6   -0.02    0.35
 -21  -3   5    4.46    0.37
 -17  -3   2   51.89    0.57
 -10  -3  -1    0.56    0.28
 -17  -4   2   -0.04    0.24
 -15  -4   1    1.27    0.31
 -13  -4   0    1.95    0.25
 -10  -4  -1    9.74    0.30
   0  -4  -1   31.95    0.40
   3  -4   0    0.80    0.24
   7  -4   2    1.57    0.24
  15  -4  10    0.18    0.35
 -19  -5   4    0.93    0.32
 -18  -5   3    0.18    0.25
 -12  -5   0    0.53    0.23
  -8  -5  -1    0.44    0.23
  -7  -5  -1   24.55    0.35
  -2  -5  -1    1.52    0.23
   2  -5   0    0.25    0.23
  17  -5  14    5.41    0.45
 -18  -6   4    0.25    0.32
 -17  -6   3    0.06    0.28
 -15  -6   2    0.59    0.26
 -13  -6   1    0.39    0.24
 -10  -6   0    9.90    0.29
   0  -6   0    5.36    0.26
   3  -6   1   -0.04    0.23
   5  -6   2    0.69    0.24
   7  -6   3   -0.09    0.23
  14  -6  10    0.87    0.32
 -18  -7   5    0.21    0.32
 -17  -7   4    0.12    0.29
 -15  -7   3    3.39    0.29
 -13  -7   2    6.77    0.28
 -11  -7   1    2.27    0.22
 -10  -7   1   -0.01    0.25
   0  -7   1    3.23    0.25
   1  -7   1    1.54    0.23
   3  -7   2    9.19    0.28
   5  -7   3    4.09    0.24
   7  -7   4    6.36    0.27
   8  -7   5    0.07    0.27
  15  -7  13    3.62    0.35
 -18  -8   6    1.12    0.33
 -16  -8   5   -0.17    0.31
 -15  -8   4   -0.06    0.29
 -13  -8   3    0.55    0.27
 -10  -8   2    7.12    0.29
  -9  -8   2    0.62    0.22
  -1  -8   2    0.08    0.21
   0  -8   2    0.26    0.24
   3  -8   3    0.53    0.24
   5  -8   4    1.51    0.25
   9  -8   7    0.92    0.27
  10  -8   8   11.32    0.34
  11  -8   9    0.30    0.28
 -15  -9   6    5.57    0.36
 -14  -9   5   -0.42    0.32
 -11  -9   4    1.19    0.28
  -8  -9   3    0.52    0.26
  -7  -9   3    1.15    0.27
  -6  -9   3    0.20    0.26
  -5  -9   3    0.21    0.25
  -4  -9   3    0.01    0.26
  -3  -9   3    4.68    0.28
  -2  -9   3    0.41    0.26
   1  -9   4    1.45    0.26
   4  -9   5    0.36    0.23
   5  -9   6    3.86    0.29
   7  -9   7    5.19    0.29
   8  -9   8    0.34    0.28
   9  -9   9    0.36    0.28
  10  -9  10    0.05    0.31
  11  -9  11    0.83    0.31
 -12 -10   6   -0.01    0.28
 -11 -10   6    0.01    0.31
  -9 -10   5    0.30    0.28
  -8 -10   5    2.35    0.30
  -7 -10   5    0.40    0.28
  -6 -10   5    0.63    0.27
  -5 -10   5    0.51    0.25
  -4 -10   5    5.34    0.28
  -3 -10   5    0.27    0.28
  -2 -10   5    3.57    0.29
  -1 -10   5    0.83    0.25
   1 -10   6    0.68    0.29
   2 -10   6   -0.01    0.25
   3 -10   7    0.21    0.29
   4 -10   7    0.32    0.25
   5 -10   8    0.05    0.29
  -5 -11   7    0.27    0.31
   0 -11   8    0.15    0.31
   1 -11   8    0.68    0.30
   2 -11   9    0.05    0.27
   3 -11   9    0.32    0.32
 -10   8  19    0.12    0.32
  -9   8  19   -0.16    0.32
  -8   8  18    0.67    0.28
  -7   8  18    0.12    0.27
  -6   8  18    0.42    0.29
  -5   8  18    0.21    0.28
  -4   8  18    0.39    0.28
  -3   8  18    0.17    0.27
  -2   8  18    0.20    0.26
  -1   8  19    0.53    0.27
   0   8  19    0.27    0.27
   1   8  20    0.44    0.28
   2   8  21    2.00    0.31
   3   8  22    0.01    0.30
   4   8  23    0.44    0.32
 -13   7  16    1.26    0.32
 -12   7  15    0.12    0.27
 -10   7  14   -0.27    0.26
  -7   7  13    1.84    0.26
  -6   7  13    0.24    0.26
  -5   7  13   10.90    0.29
  -4   7  13    0.73    0.25
  -3   7  13    3.11    0.27
  -1   7  14    5.08    0.25
   0   7  14    0.24    0.25
   2   7  15    0.75    0.25
   3   7  16    2.77    0.26
   4   7  17    0.35    0.24
   5   7  18    4.61    0.26
   6   7  19    0.24    0.27
   7   7  20    0.90    0.28
   8   7  22   -0.06    0.29
 -18   6  16   -0.14    0.39
 -17   6  15    0.05    0.35
 -16   6  14    1.01    0.31
 -15   6  13    0.02    0.34
 -12   6  11    3.05    0.30
  -9   6  10    0.09    0.22
  -8   6  10   29.94    0.36
  -2   6  10    2.99    0.24
  -1   6  10    1.07    0.25
   1   6  11    0.93    0.19
   2   6  11    4.02    0.26
   3   6  12    1.23    0.24
   5   6  13    0.31    0.23
   6   6  14    4.27    0.27
   7   6  15    0.08    0.24
   8   6  16    0.83    0.23
   9   6  18   -0.06    0.26
  10   6  19    2.62    0.26
  11   6  21    0.60    0.27
  11   6  22   -0.05    0.28
 -15   5  10   11.27    0.32
  -8   5   7    0.76    0.23
  -3   5   7    4.36    0.25
  -2   5   7    1.73    0.25
   1   5   8   24.72    0.34
   5   5  10    3.20    0.24
   6   5  11    0.48    0.17
   9   5  14    4.30    0.24
  10   5  15    0.72    0.24
  12   5  18    0.43    0.28
  13   5  20    3.99    0.31
  14   5  23   -0.17    0.33
 -21   4  13   -0.01    0.38
 -16   4   8    9.19    0.37
 -12   4   6   21.32    0.39
  -9   4   5    0.76    0.23
  -1   4   5    2.33    0.25
   2   4   6   56.87    0.47
   4   4   7   28.66    0.38
   7   4   9    0.15    0.24
  10   4  12   12.58    0.31
  11   4  13    0.15    0.23
  13   4  16    0.03    0.26
  14   4  18    1.00    0.28
  15   4  20    0.13    0.31
  16   4  23    4.30    0.36
 -23   3  13    1.71    0.48
 -16   3   6    0.23    0.31
 -12   3   4    0.01    0.27
  -8   3   3    0.17    0.24
  -2   3   3    1.06    0.25
   2   3   4    0.99    0.23
   4   3   5    0.73    0.24
  13   3  13    6.76    0.34
  14   3  15    0.15    0.25
  16   3  19    0.16    0.29
  17   3  22    4.95    0.35
   0   2   2  538.80    1.80
   3   2   3    4.62    0.31
   5   2   4    0.60    0.23
   8   2   6  179.77    0.92
  13   2  11    0.17    0.31
  15   2  14   -0.05    0.31
  16   2  16    2.53    0.32
  17   2  18   -0.10    0.31
  18   2  21    4.35    0.37
  16   1  14    0.05    0.30
  17   1  16    7.50    0.37
  18   1  18    0.02    0.35
  19   1  21    5.09    0.43
 -18   0   4    0.12    0.46
   7   0   3    0.49    0.37
  19   0  19    0.35    0.39
 -23  -1   8    7.51    0.55
 -16  -1   2    0.83    0.33
 -14  -1   1    0.26    0.31
  -7  -1  -1   18.86    0.48
  15  -1  10   11.23    0.69
 -18  -2   3    8.36    0.40
  -9  -2  -1    0.38    0.29
 -15  -3   1   16.49    0.40
 -13  -3   0   16.07    0.35
   0  -3  -1    1.64    0.26
   3  -3   0   23.12    0.39
 -18  -4   3    1.75    0.30
  -9  -4  -1    0.29    0.24
  -1  -4  -1    0.92    0.24
   5  -4   1    3.77    0.27
  19  -4  18    0.32    0.62
 -22  -5   7   -0.22    0.37
 -21  -5   6    0.27    0.34
 -20  -5   5    0.18    0.30
 -16  -5   2    0.15    0.25
 -14  -5   1    3.61    0.27
 -11  -5   0   -0.06    0.23
  -6  -5  -1    0.60    0.24
  -5  -5  -1   37.31    0.40
  -4  -5  -1    0.94    0.25
  -3  -5  -1   25.42    0.31
   4  -5   1    0.74    0.24
   6  -5   2    0.86    0.24
   9  -5   4   14.04    0.33
  12  -5   7    0.18    0.28
  13  -5   8    0.41    0.28
 -21  -6   7    0.23    0.36
 -20  -6   6    0.49    0.35
 -19  -6   5    0.08    0.29
 -16  -6   3    4.43    0.31
 -12  -6   1   19.95    0.33
  -9  -6   0    0.41    0.24
  -8  -6   0    2.70    0.25
  -2  -6   0    0.70    0.22
  -1  -6   0    0.18    0.22
   2  -6   1    3.45    0.24
   8  -6   4   15.17    0.32
   9  -6   5    1.02    0.29
 -20  -7   7   -0.01    0.33
 -19  -7   6    0.77    0.32
 -16  -7   4    0.25    0.28
 -12  -7   2    0.19    0.24
  -9  -7   1    0.86    0.25
  -8  -7   1    0.62    0.23
  -2  -7   1    0.02    0.22
  -1  -7   1    1.58    0.26
   2  -7   2    0.76    0.22
   9  -7   6    1.23    0.25
  10  -7   7    0.51    0.28
  11  -7   8    2.86    0.31
  12  -7   9    0.22    0.28
  16  -7  15    0.14    0.38
 -17  -8   6    0.03    0.30
 -14  -8   4    6.86    0.31
 -12  -8   3    1.14    0.24
 -11  -8   3    0.13    0.25
  -8  -8   2    3.59    0.27
  -7  -8   2    0.84    0.25
  -6  -8   2    1.55    0.25
  -5  -8   2    0.20    0.23
  -4  -8   2    1.68    0.25
  -3  -8   2   -0.02    0.25
  -2  -8   2    1.59    0.25
   2  -8   3    2.19    0.25
   4  -8   4   17.13    0.33
   6  -8   5   12.73    0.31
   7  -8   6    0.03    0.26
  13  -8  12   -0.19    0.32
 -14  -9   6    0.30    0.28
 -13  -9   5    0.26    0.26
 -12  -9   5   -0.17    0.26
 -10  -9   4   -0.07    0.27
  -9  -9   4    1.93    0.28
  -1  -9   4    1.81    0.25
   0  -9   4    0.18    0.26
   2  -9   5    1.25    0.29
   3  -9   5    4.93    0.26
   6  -9   7    0.30    0.27
  12  -9  13    0.08    0.33
 -12 -10   7    2.65    0.33
 -10 -10   6    4.82    0.33
  -9 -10   6    0.15    0.30
  -1 -10   6    0.34    0.26
   0 -10   6    1.04    0.28
   2 -10   7    2.20    0.29
   4 -10   8    2.27    0.29
   6 -10   9    0.20    0.30
   7 -10  10    0.30    0.30
   8 -10  11    0.49    0.33
   9 -10  12    0.13    0.32
  -5 -11   8    0.14    0.28
  -2 -11   8   -0.22    0.32
  -1 -11   8    2.41    0.30
   1 -11   9    2.15    0.32
 -11   8  19    0.08    0.31
 -10   8  18    0.32    0.32
  -9   8  18    0.02    0.30
  -8   8  17    3.11    0.28
  -7   8  17   -0.18    0.27
  -6   8  17    0.35    0.28
  -5   8  17    0.02    0.28
  -4   8  17    0.56    0.27
  -3   8  17   -0.32    0.27
  -2   8  17    1.34    0.26
  -1   8  18   -0.14    0.27
   0   8  18    0.05    0.28
   1   8  19   -0.06    0.27
   2   8  20    0.01    0.27
   3   8  20    0.48    0.25
   3   8  21    0.03    0.27
   4   8  21    3.59    0.28
   4   8  22   -0.06    0.32
   5   8  23   -0.33    0.32
 -15   7  17    1.10    0.33
 -14   7  16    0.07    0.32
 -13   7  15    2.99    0.30
 -11   7  14   -0.18    0.28
  -9   7  13    1.25    0.25
  -8   7  13    0.41    0.23
  -2   7  13    0.93    0.22
  -1   7  13    9.65    0.28
   1   7  14    4.56    0.26
   3   7  15    7.85    0.28
   4   7  16    0.12    0.26
   5   7  17    0.33    0.24
   6   7  18    0.00    0.27
   7   7  19    0.76    0.28
   8   7  21    0.23    0.29
   9   7  22    0.39    0.27
   9   7  23    0.10    0.32
 -14   6  12    0.94    0.27
 -10   6  10    4.42    0.26
  -7   6   9    1.54    0.23
  -6   6   9    7.04    0.28
  -5   6   9    0.12    0.24
  -4   6   9   13.75    0.30
  -3   6   9    0.98    0.25
   0   6  10    0.64    0.24
   3   6  11    1.15    0.24
   4   6  12    4.97    0.27
   9   6  17   -0.04    0.25
  10   6  18    7.94    0.29
  11   6  20    0.14    0.30
  12   6  22    1.79    0.29
  12   6  23    4.24    0.32
 -19   5  13    0.66    0.33
 -18   5  12    0.20    0.34
 -17   5  11    2.56    0.32
 -14   5   9    0.19    0.24
 -12   5   8    0.38    0.25
 -10   5   7    0.33    0.28
  -9   5   7    4.19    0.27
  -1   5   7   23.14    0.34
   0   5   7    0.57    0.22
   2   5   8    1.69    0.23
   4   5   9    0.82    0.23
   7   5  11    4.46    0.25
   8   5  12    0.92    0.24
   9   5  13   37.62    0.39
  11   5  16    2.35    0.26
  12   5  17    0.32    0.27
  13   5  19    2.00    0.26
  14   5  22   -0.01    0.33
 -22   4  14    1.02    0.45
 -13   4   6    0.11    0.28
 -10   4   5    4.47    0.27
   0   4   5   14.29    0.31
   3   4   6    1.75    0.24
   6   4   8   31.04    0.38
  12   4  14    7.62    0.28
  14   4  17    4.22    0.31
  16   4  22    2.49    0.37
  -9   3   3    8.35    0.34
  -1   3   3  159.80    0.84
   6   3   6    0.76    0.25
  15   3  16    4.04    0.31
  16   3  18    0.11    0.31
  17   3  21    4.09    0.35
   7   2   5    0.81    0.24
  14   2  12   21.15    0.42
  18   2  20    0.14    0.32
  11   1   7    5.60    0.31
  15   1  12    5.49    0.34
  17   0  14    0.23    0.35
  18   0  16    0.32    0.38
 -22  -1   7    0.11    0.44
 -21  -1   6    4.93    0.48
 -20  -1   5    0.47    0.38
  -6  -1  -1    2.31    0.31
  -3  -1  -1   35.21    0.65
  18  -1  15    0.13    0.48
  20  -1  20    0.17    0.55
 -24  -2   9    0.68    0.46
  -1  -2  -1    2.26    0.32
 -18  -3   3    0.27    0.29
  -9  -3  -1   53.12    0.51
  -1  -3  -1  210.44    0.96
   5  -3   1   73.13    0.65
 -23  -4   8    0.25    0.35
 -20  -4   5    0.27    0.30
 -19  -4   4    0.08    0.31
 -16  -4   2    6.00    0.32
 -14  -4   1   12.80    0.36
 -12  -4   0   16.46    0.33
  -8  -4  -1   10.69    0.30
  -7  -4  -1    0.99    0.25
  -3  -4  -1    0.46    0.23
  -2  -4  -1   73.29    0.54
   2  -4   0   25.64    0.38
 -17  -5   3    4.39    0.28
 -15  -5   2    5.71    0.30
 -13  -5   1    4.48    0.25
 -10  -5   0    0.91    0.24
   1  -5   0    5.63    0.21
   7  -5   3    4.58    0.31
  15  -5  11    3.24    0.37
 -17  -6   4    0.34    0.29
 -14  -6   2    2.38    0.27
 -11  -6   1    0.34    0.24
  -7  -6   0   -0.02    0.22
  -6  -6   0    1.20    0.24
  -5  -6   0    0.24    0.22
  -4  -6   0   -0.13    0.22
  -3  -6   0   -0.04    0.22
   4  -6   2    2.29    0.25
   6  -6   3    1.44    0.24
  10  -6   6    6.10    0.29
  11  -6   7    0.34    0.27
  15  -6  12   -0.09    0.33
 -17  -7   5    0.02    0.30
 -14  -7   3    1.19    0.25
 -11  -7   2   13.48    0.31
  -7  -7   1    2.61    0.25
  -6  -7   1    0.11    0.25
  -5  -7   1    2.70    0.27
  -4  -7   1    2.63    0.26
  -3  -7   1    6.14    0.28
   1  -7   2    6.52    0.27
   4  -7   3    2.52    0.25
   6  -7   4    0.20    0.23
 -18  -8   7    0.33    0.32
 -16  -8   6    0.36    0.32
 -15  -8   5    0.58    0.29
 -13  -8   4    0.37    0.28
 -10  -8   3    3.83    0.28
   0  -8   3    1.67    0.24
   1  -8   3    0.22    0.22
   3  -8   4    0.54    0.25
   5  -8   5    0.48    0.26
   8  -8   7    8.04    0.31
   9  -8   8    0.69    0.28
  10  -8   9    0.18    0.31
  11  -8  10    0.07    0.28
  12  -8  11    3.04    0.31
  14  -8  14    0.28    0.32
 -15  -9   7    2.33    0.34
 -13  -9   6    2.83    0.27
 -11  -9   5    1.99    0.28
  -8  -9   4    0.10    0.27
  -7  -9   4    1.69    0.27
  -6  -9   4    0.68    0.26
  -5  -9   4    3.55    0.27
  -4  -9   4    0.46    0.25
  -3  -9   4   13.84    0.32
  -2  -9   4    0.39    0.26
   1  -9   5    4.27    0.30
   4  -9   6    0.31    0.24
   5  -9   7   13.44    0.33
   7  -9   8    2.01    0.28
   8  -9   9    0.23    0.28
   9  -9  10    0.24    0.29
  10  -9  11    0.25    0.31
  11  -9  12    0.66    0.32
 -11 -10   7    0.00    0.31
 -10 -10   7    1.18    0.29
  -8 -10   6    0.58    0.27
  -7 -10   6    0.10    0.27
  -6 -10   6    0.35    0.29
  -5 -10   6    0.35    0.28
  -4 -10   6    6.66    0.31
  -3 -10   6    0.27    0.29
  -2 -10   6    0.03    0.27
   1 -10   7    0.91    0.29
   3 -10   8   -0.05    0.26
   5 -10   9    0.25    0.29
   6 -10  10    2.56    0.28
  -2 -11   9    0.19    0.29
  -1 -11   9    0.82    0.33
   0 -11   9    0.31    0.28
   2 -11  10   -0.05    0.31
 -11   8  18    0.13    0.31
 -10   8  17    0.54    0.31
  -9   8  17    0.31    0.30
  -7   8  16    0.19    0.27
  -6   8  16    4.93    0.29
  -5   8  16   -0.10    0.27
  -4   8  16    0.59    0.27
  -3   8  16    0.02    0.27
  -2   8  16    0.88    0.24
  -1   8  17    0.19    0.26
   0   8  17    2.55    0.28
   1   8  18   -0.20    0.27
   2   8  18    1.83    0.25
   2   8  19    1.54    0.21
   3   8  19    0.20    0.27
   4   8  20    0.36    0.29
   5   8  21    0.09    0.28
   5   8  22    0.15    0.29
 -16   7  17    0.10    0.33
 -15   7  16    0.16    0.32
 -14   7  15    0.14    0.31
 -12   7  14    0.00    0.26
 -11   7  13    1.31    0.26
 -10   7  13    0.26    0.26
  -8   7  12    0.33    0.24
  -7   7  12    0.92    0.25
  -6   7  12    0.16    0.26
  -5   7  12    7.66    0.28
  -4   7  12    0.51    0.26
  -3   7  12    0.43    0.26
  -2   7  12    0.21    0.24
   0   7  13    0.44    0.17
   1   7  13   10.41    0.29
   2   7  14    0.80    0.18
   3   7  14   10.42    0.28
   4   7  15    0.28    0.26
   5   7  16    3.22    0.27
   6   7  17    0.21    0.27
   7   7  18    2.27    0.27
   8   7  19    0.12    0.25
   8   7  20    0.03    0.26
   9   7  21    2.13    0.29
  10   7  23   -0.35    0.33
 -18   6  15    0.20    0.37
 -17   6  14   -0.08    0.32
 -16   6  13    1.66    0.31
 -15   6  12    0.09    0.32
 -13   6  11   -0.14    0.26
 -11   6  10    0.15    0.25
  -9   6   9    0.95    0.23
  -8   6   9    5.38    0.26
  -2   6   9   23.44    0.34
  -1   6   9    1.00    0.25
   1   6  10    1.07    0.19
   2   6  10    3.35    0.24
   5   6  12    0.45    0.25
   6   6  13    5.35    0.27
   7   6  14    0.50    0.23
   8   6  15    3.35    0.26
   9   6  16    0.06    0.25
  11   6  19    0.21    0.29
  12   6  21    3.14    0.30
 -20   5  14    0.06    0.35
 -16   5  10    0.15    0.30
 -13   5   8    0.87    0.29
  -6   5   6    0.46    0.24
  -5   5   6    2.03    0.25
  -4   5   6    0.27    0.24
   1   5   7   23.22    0.34
   3   5   8   39.09    0.40
   5   5   9    7.18    0.27
   6   5  10    0.70    0.22
  10   5  14    0.02    0.22
  11   5  15    2.26    0.25
  13   5  18    6.16    0.31
  14   5  21   -0.17    0.31
  15   5  23    3.92    0.36
 -20   4  11    1.46    0.39
 -19   4  10    0.28    0.38
 -15   4   7    0.06    0.29
 -11   4   5    0.02    0.28
  -6   4   4  103.56    0.68
  -5   4   4    2.39    0.26
  -4   4   4   10.42    0.31
   1   4   5    1.93    0.24
   5   4   7    0.58    0.22
   8   4   9    7.27    0.28
   9   4  10    0.34    0.24
  10   4  11   62.63    0.48
  11   4  12    1.06    0.23
  13   4  15   -0.19    0.25
  15   4  19   -0.10    0.29
  16   4  21    1.39    0.35
 -21   3  10    3.73    0.51
 -20   3   9    0.07    0.38
 -19   3   8    8.45    0.47
   0   3   3    2.48    0.26
   3   3   4   55.90    0.51
   5   3   5   29.06    0.40
   8   3   7    1.69    0.25
   9   3   8   43.71    0.45
  10   3   9   -0.04    0.23
  11   3  10   19.73    0.35
  12   3  11    0.32    0.24
  14   3  14    0.18    0.24
  17   3  20    3.21    0.38
 -17   2   5    0.20    0.42
   1   2   2    4.95    0.36
  16   2  15    1.25    0.32
  17   2  17   -0.11    0.30
  10   1   6    0.19    0.26
  12   1   8   -0.01    0.26
  13   1   9    5.27    0.35
  17   1  15   10.63    0.43
  19   1  20    4.77    0.43
  11   0   6    0.75    0.33
  12   0   7   14.18    0.49
  13   0   8    0.01    0.34
  20   0  21    0.70    0.48
 -11  -1   0    0.34    0.29
  -5  -1  -1   62.39    0.79
  -4  -1  -1    0.47    0.30
  17  -1  13    6.26    0.57
 -19  -2   4    0.24    0.31
 -16  -2   2   14.34    0.39
 -12  -2   0    0.77    0.22
  -8  -2  -1   75.68    0.67
 -24  -3   9    0.14    0.40
 -23  -3   8    2.54    0.41
 -19  -3   4    1.22    0.32
 -16  -3   2    1.11    0.30
 -14  -3   1    2.17    0.31
 -12  -3   0    1.41    0.25
  -8  -3  -1    0.27    0.23
  -2  -3  -1    0.57    0.25
  15  -3  10   17.57    0.66
 -22  -4   7    0.08    0.33
 -21  -4   6    0.18    0.32
 -11  -4   0    1.25    0.25
  -6  -4  -1   33.54    0.41
  -5  -4  -1    3.63    0.27
  -4  -4  -1   20.38    0.35
   4  -4   1   21.04    0.37
   6  -4   2  114.15    0.74
  14  -4   9    3.45    0.35
  16  -4  12    7.97    0.48
 -19  -5   5    1.51    0.33
 -18  -5   4    0.08    0.26
  -9  -5   0    4.74    0.27
  -1  -5   0    5.51    0.25
   0  -5   0    0.30    0.22
   3  -5   1   26.20    0.36
   5  -5   2   10.74    0.30
 -19  -6   6    0.02    0.33
 -18  -6   5    1.14    0.29
 -15  -6   3    0.17    0.26
 -13  -6   2    0.63    0.25
 -10  -6   1    3.27    0.25
   0  -6   1    3.55    0.23
   1  -6   1    0.22    0.17
   7  -6   4    0.66    0.24
  14  -6  11    3.39    0.33
  16  -6  14    0.93    0.37
  17  -6  16    0.09    0.42
 -19  -7   7    1.17    0.33
 -18  -7   6    0.25    0.31
 -15  -7   4    9.45    0.32
 -13  -7   3    0.99    0.25
 -10  -7   2    0.01    0.24
  -9  -7   2    2.24    0.24
   0  -7   2    1.39    0.24
   3  -7   3   13.24    0.30
   5  -7   4   19.86    0.33
   7  -7   5   14.74    0.31
   8  -7   6    0.21    0.27
  15  -7  14    0.17    0.33
  16  -7  16    0.06    0.39
 -17  -8   7    0.28    0.30
 -14  -8   5    1.40    0.29
 -12  -8   4    1.93    0.25
  -9  -8   3    0.23    0.23
  -8  -8   3    0.70    0.25
  -7  -8   3    0.56    0.23
  -2  -8   3    2.21    0.25
  -1  -8   3    0.26    0.23
   2  -8   4    6.25    0.28
   4  -8   5    7.14    0.28
   6  -8   6    1.47    0.26
  13  -8  13    0.29    0.31
 -14  -9   7    0.32    0.31
 -12  -9   6    0.32    0.29
 -10  -9   5   -0.01    0.27
  -9  -9   5    0.63    0.27
  -1  -9   5    4.16    0.27
   0  -9   5    0.49    0.26
   2  -9   6    0.32    0.25
   3  -9   6    2.31    0.25
   6  -9   8   -0.15    0.27
  11  -9  13    1.43    0.34
  12  -9  14   -0.22    0.34
 -11 -10   8    0.07    0.29
  -9 -10   7    0.01    0.30
  -8 -10   7    0.28    0.29
  -2 -10   7    1.90    0.27
  -1 -10   7    0.78    0.30
   0 -10   7   10.68    0.30
   2 -10   8    2.15    0.30
   4 -10   9    1.25    0.30
   5 -10  10   -0.37    0.32
   7 -10  11    0.00    0.30
   8 -10  12    1.87    0.33
  -3 -11   9    0.09    0.29
  -1 -11  10    0.42    0.29
   0 -11  10    0.44    0.33
 -12   8  18    1.79    0.30
 -11   8  17    0.08    0.30
 -10   8  16    4.83    0.33
  -9   8  16    0.05    0.29
  -8   8  16    3.92    0.27
  -7   8  15    0.42    0.24
  -6   8  15    5.00    0.30
  -5   8  15    0.31    0.28
  -4   8  15    0.39    0.26
  -3   8  15   -0.04    0.24
  -1   8  16    0.01    0.27
   0   8  16    0.55    0.26
   1   8  17    0.23    0.26
   2   8  17    2.28    0.25
   3   8  18    0.27    0.28
   4   8  19    0.92    0.28
   5   8  20    0.16    0.30
   6   8  21    0.36    0.28
   6   8  22    0.14    0.29
 -16   7  16    0.14    0.38
 -15   7  15    4.40    0.37
 -13   7  14    2.44    0.30
 -12   7  13    0.40    0.27
 -10   7  12    0.19    0.26
  -9   7  12   10.18    0.30
  -6   7  11    0.51    0.23
  -5   7  11    0.16    0.25
  -4   7  11    0.57    0.23
  -1   7  12    2.35    0.19
   0   7  12    0.29    0.25
   2   7  13    0.89    0.24
   4   7  14    0.62    0.26
   5   7  15    4.45    0.28
   6   7  16   -0.01    0.25
   7   7  17    4.25    0.29
   8   7  18    0.13    0.25
   9   7  20    3.26    0.29
  10   7  22   -0.20    0.32
 -14   6  11    3.43    0.28
 -12   6  10   11.45    0.32
 -10   6   9    5.97    0.27
  -5   6   8    0.52    0.23
  -4   6   8   14.13    0.30
   0   6   9   54.83    0.44
   3   6  10    1.57    0.24
   4   6  11   32.24    0.36
   6   6  12   21.88    0.33
   7   6  13    0.78    0.25
   8   6  14   26.85    0.36
   9   6  15    0.68    0.24
  10   6  17    6.81    0.27
  11   6  18    0.18    0.28
  12   6  20    0.55    0.29
  13   6  22    0.11    0.27
 -15   5   9    0.14    0.25
 -11   5   7   17.69    0.35
  -8   5   6    1.04    0.24
  -7   5   6   23.18    0.37
  -3   5   6   13.89    0.30
  -2   5   6    0.78    0.24
   2   5   7    1.99    0.23
   4   5   8    0.72    0.23
   7   5  10    0.08    0.23
   8   5  11    0.64    0.24
   9   5  12   15.79    0.31
  10   5  13    0.40    0.23
  12   5  16    0.07    0.25
  14   5  20    0.09    0.31
  15   5  22    1.52    0.33
 -21   4  12    0.10    0.39
 -18   4   9    0.78    0.32
  -8   4   4   21.25    0.40
  -7   4   4    0.44    0.25
  -3   4   4    1.38    0.26
  -2   4   4   50.97    0.47
   2   4   5   98.01    0.59
   4   4   6   40.51    0.42
   7   4   8    1.36    0.25
  12   4  13    3.51    0.25
  14   4  16    5.05    0.28
  15   4  18    0.04    0.28
  16   4  20    4.55    0.36
 -22   3  11    0.37    0.48
 -18   3   7    0.14    0.37
 -15   3   5   11.73    0.42
 -13   3   4    5.57    0.36
 -10   3   3   -0.02    0.25
   7   3   6   10.67    0.30
  13   3  12   29.58    0.42
  15   3  15    2.84    0.30
  16   3  17   -0.13    0.26
  17   3  19    6.69    0.37
  18   3  22    0.14    0.40
 -11   2   2    0.52    0.29
   4   2   3  297.01    1.25
   6   2   4   34.23    0.49
  10   2   7    4.41    0.30
  11   2   8    0.24    0.24
  12   2   9   26.94    0.45
  15   2  13    0.33    0.28
  18   2  19    0.88    0.35
   4   1   2    0.13    0.36
   6   1   3    0.11    0.26
   9   1   5   79.13    0.77
  16   1  13    0.10    0.31
  18   1  17    0.06    0.35
  10   0   5   33.05    0.72
  16   0  12   43.44    0.69
  19   0  18    0.19    0.39
  19  -1  17    1.06    0.52
 -23  -2   8    0.08    0.39
 -22  -2   7    6.89    0.44
 -21  -2   6    0.17    0.35
 -20  -2   5    5.97    0.40
 -14  -2   1   26.45    0.47
  -7  -2  -1    0.19    0.22
  -3  -2  -1    2.47    0.30
  -2  -2  -1  382.49    1.50
   2  -2   0  107.70    0.90
   8  -2   3    2.88    0.35
 -22  -3   7    0.07    0.35
 -21  -3   6    2.18    0.36
 -20  -3   5    0.14    0.30
 -11  -3   0    1.55    0.28
  -7  -3  -1   92.63    0.64
  -6  -3  -1    0.57    0.24
  -5  -3  -1   72.59    0.58
  -4  -3  -1    1.82    0.25
  -3  -3  -1    1.99    0.25
   2  -3   0    0.10    0.23
 -17  -4   3    0.34    0.26
 -15  -4   2    1.85    0.31
 -13  -4   1    0.70    0.24
 -10  -4   0    4.27    0.27
   1  -4   0    2.43    0.25
  13  -4   8    0.03    0.30
 -22  -5   8   -0.09    0.32
 -21  -5   7    2.23    0.34
 -20  -5   6    0.18    0.29
 -16  -5   3    0.31    0.25
 -14  -5   2    0.34    0.25
 -12  -5   1    1.31    0.22
  -8  -5   0    0.42    0.24
  -7  -5   0    2.90    0.26
  -3  -5   0    8.23    0.26
  -2  -5   0    0.35    0.23
   2  -5   1    1.10    0.25
   8  -5   4   -0.16    0.22
  14  -5  10   -0.12    0.31
  16  -5  13    0.09    0.36
  18  -5  17    0.24    0.43
 -21  -6   8   -0.12    0.33
 -20  -6   7    0.38    0.31
 -16  -6   4    3.66    0.30
 -14  -6   3    2.30    0.24
 -12  -6   2    3.29    0.24
  -9  -6   1    0.65    0.24
  -8  -6   1    0.50    0.23
  -1  -6   1    0.07    0.22
   3  -6   2    0.30    0.17
   5  -6   3    0.03    0.24
   8  -6   5   34.77    0.41
 -17  -7   6    0.36    0.29
 -16  -7   5    0.49    0.25
 -14  -7   4    0.40    0.25
 -12  -7   3    0.37    0.25
  -8  -7   2    1.53    0.26
  -7  -7   2    3.93    0.26
  -2  -7   2    0.51    0.24
  -1  -7   2    7.18    0.27
   2  -7   3    0.51    0.23
   6  -7   5    0.96    0.22
   9  -7   7    8.47    0.30
  10  -7   8    1.06    0.27
  11  -7   9    1.35    0.25
  12  -7  10    0.41    0.26
 -16  -8   7    5.16    0.30
 -15  -8   6    0.28    0.29
 -13  -8   5    0.09    0.27
 -11  -8   4   -0.11    0.24
 -10  -8   4    0.84    0.27
  -6  -8   3    2.45    0.24
  -5  -8   3    0.68    0.23
  -4  -8   3    5.06    0.25
  -3  -8   3    0.80    0.17
   1  -8   4    0.23    0.24
   3  -8   5    1.35    0.23
   5  -8   6    0.18    0.23
   7  -8   7    0.21    0.27
   8  -8   8    1.65    0.27
   9  -8   9    0.08    0.29
  10  -8  10    1.38    0.32
  11  -8  11    0.05    0.34
  12  -8  12    0.40    0.29
  14  -8  15    0.68    0.33
 -15  -9   8    3.00    0.33
 -13  -9   7    2.95    0.29
 -11  -9   6    4.26    0.30
 -10  -9   6   -0.08    0.26
  -8  -9   5   -0.02    0.24
  -7  -9   5    2.42    0.28
  -6  -9   5    0.67    0.27
  -5  -9   5    0.77    0.26
  -4  -9   5    0.50    0.25
  -3  -9   5    4.17    0.29
  -2  -9   5    1.68    0.26
   1  -9   6    5.41    0.30
   4  -9   7    0.91    0.24
   5  -9   8    0.49    0.24
   7  -9   9    1.31    0.28
   8  -9  10   -0.20    0.30
   9  -9  11    0.11    0.30
  10  -9  12    0.27    0.31
 -10 -10   8    0.98    0.32
  -9 -10   8   -0.06    0.28
  -7 -10   7    0.44    0.26
  -5 -10   7    0.44    0.28
  -4 -10   7    0.28    0.28
  -3 -10   7    0.02    0.25
   0 -10   8   -0.17    0.29
   1 -10   8    0.42    0.29
   3 -10   9    0.08    0.28
   6 -10  11    0.18    0.31
   7 -10  12   -0.06    0.29
   8 -10  13   -0.17    0.32
  -2 -11  10    0.59    0.33
  -4   9  20   -0.16    0.32
  -3   9  20    0.29    0.33
  -2   9  20    0.21    0.32
  -1   9  20    0.11    0.28
   1   9  21    1.34    0.29
 -12   8  17    0.92    0.33
 -11   8  16    0.59    0.30
  -9   8  15    0.28    0.29
  -8   8  15    7.71    0.30
  -5   8  14   -0.05    0.25
  -2   8  15    0.29    0.23
  -1   8  15    0.12    0.26
   0   8  15   -0.11    0.23
   1   8  16    0.25    0.28
   2   8  16    0.51    0.24
   3   8  17    0.13    0.27
   4   8  18    0.28    0.28
   5   8  19   -0.01    0.29
   6   8  20    3.31    0.31
   7   8  21    0.20    0.28
   7   8  22   -0.22    0.32
 -14   7  14    0.15    0.29
 -13   7  13    7.26    0.31
 -11   7  12    2.94    0.28
  -9   7  11    6.64    0.32
  -8   7  11    0.64    0.25
  -7   7  11   17.78    0.32
  -3   7  11   20.79    0.28
  -2   7  11    0.27    0.25
  -1   7  11    3.40    0.26
   1   7  12    2.83    0.25
   2   7  12    0.06    0.23
   3   7  13    3.21    0.26
   5   7  14    4.99    0.25
   6   7  15    0.45    0.25
   7   7  16    5.40    0.29
   8   7  17    0.27    0.25
   9   7  19    0.82    0.27
  10   7  20   -0.13    0.27
  10   7  21    0.32    0.27
  11   7  22   -0.07    0.35
 -19   6  15    0.58    0.37
 -18   6  14    0.18    0.31
 -17   6  13   -0.06    0.29
 -16   6  12   -0.03    0.31
 -13   6  10    0.17    0.25
 -11   6   9    0.12    0.25
  -8   6   8   24.22    0.35
  -7   6   8    1.40    0.24
  -6   6   8   43.14    0.41
  -3   6   8    2.46    0.24
  -2   6   8    0.31    0.24
  -1   6   8    1.71    0.23
   1   6   9    0.73    0.18
   2   6   9   23.77    0.33
   5   6  11    0.22    0.23
  10   6  16    7.60    0.29
  11   6  17    0.46    0.25
  12   6  19    6.91    0.33
  13   6  21   -0.12    0.30
 -20   5  13   -0.12    0.36
 -19   5  12   -0.20    0.39
 -18   5  11    0.01    0.34
 -17   5  10    7.27    0.36
 -14   5   8    0.26    0.28
 -12   5   7    0.32    0.25
  -9   5   6    8.72    0.29
  -1   5   6   42.21    0.38
   0   5   6    0.58    0.24
   6   5   9    2.00    0.24
  11   5  14    0.17    0.24
  12   5  15    0.14    0.27
  13   5  17    1.80    0.28
  14   5  19    0.15    0.28
  15   5  21    1.33    0.34
 -22   4  13    0.43    0.44
 -17   4   8    0.10    0.29
 -14   4   6    0.56    0.28
 -12   4   5    0.73    0.31
  -9   4   4    0.45    0.28
  -1   4   4    1.85    0.24
   6   4   7   14.10    0.30
  10   4  10   27.81    0.39
  13   4  14    0.20    0.25
  15   4  17    0.07    0.32
  16   4  19    0.45    0.34
  17   4  22   -0.13    0.38
   1   3   3  158.66    0.82
  14   3  13    0.31    0.24
  18   3  21    0.03    0.36
  -6   2   1   61.53    0.74
  -5   2   1    0.72    0.24
  -4   2   1  321.59    1.53
  -3   2   1    2.56    0.35
   9   2   6    1.72    0.25
  13   2  10    0.20    0.26
  17   2  16   -0.17    0.31
  19   2  21    0.00    0.39
  14   1  10   -0.06    0.28
  19   1  19    0.58    0.40
 -23   0   9    0.34    0.58
 -19   0   5    0.13    0.47
  -9   0   0   -0.05    0.37
  14   0   9    5.14    0.41
 -17  -1   3   10.81    0.43
 -11  -2   0    0.10    0.26
  -6  -2  -1   60.06    0.60
  -5  -2  -1    0.90    0.23
  -4  -2  -1  326.38    1.34
 -17  -3   3    5.96    0.33
   4  -3   1    1.72    0.28
 -23  -4   9   -0.07    0.36
 -19  -4   5    0.04    0.30
 -18  -4   4    5.03    0.28
  -9  -4   0    0.55    0.24
   0  -4   0   79.18    0.56
   7  -4   3    1.18    0.28
  11  -4   6    0.09    0.28
  12  -4   7    3.02    0.31
  17  -4  14    0.26    0.42
  18  -4  16    7.44    0.58
 -17  -5   4    0.27    0.25
 -15  -5   3    9.87    0.33
 -13  -5   2   24.51    0.38
 -11  -5   1    9.47    0.28
  -6  -5   0    1.29    0.17
  -5  -5   0    4.14    0.26
  -4  -5   0    0.17    0.23
   4  -5   2    0.60    0.24
   6  -5   3    1.24    0.24
   9  -5   5   35.42    0.45
  13  -5   9    8.27    0.35
  17  -5  15    1.67    0.39
 -18  -6   6    1.33    0.33
 -17  -6   5   -0.12    0.27
 -11  -6   2    0.75    0.24
  -7  -6   1    0.04    0.23
  -6  -6   1    3.05    0.24
  -5  -6   1    0.78    0.24
  -4  -6   1    3.56    0.24
  -3  -6   1   -0.05    0.22
  -2  -6   1    3.90    0.24
   2  -6   2    4.90    0.26
   4  -6   3    5.67    0.27
   6  -6   4   31.59    0.39
   9  -6   6    0.78    0.25
  10  -6   7   10.15    0.37
  11  -6   8    0.00    0.27
  15  -6  13    0.05    0.33
 -19  -7   8    0.25    0.32
 -18  -7   7   -0.21    0.31
 -15  -7   5    1.20    0.27
 -13  -7   4    0.42    0.25
 -11  -7   3    5.21    0.25
 -10  -7   3    0.04    0.25
  -6  -7   2    0.13    0.23
  -5  -7   2   19.32    0.33
  -4  -7   2    1.51    0.25
  -3  -7   2    9.05    0.23
   1  -7   3    0.87    0.24
   4  -7   4    1.13    0.25
   7  -7   6    4.47    0.25
  15  -7  15    5.06    0.38
 -17  -8   8    0.07    0.29
 -14  -8   6    5.05    0.30
 -12  -8   5    1.72    0.27
  -9  -8   4    0.14    0.25
  -8  -8   4    5.13    0.27
  -2  -8   4    6.60    0.25
  -1  -8   4    0.23    0.23
   0  -8   4    9.85    0.27
   2  -8   5    0.52    0.23
   6  -8   7    5.93    0.28
  13  -8  14    0.04    0.32
  14  -8  16    1.28    0.37
 -14  -9   8    0.37    0.31
 -12  -9   7    0.51    0.29
  -9  -9   6    0.56    0.26
  -8  -9   6    0.25    0.24
  -1  -9   6    5.35    0.28
   0  -9   6   -0.18    0.26
   2  -9   7    0.17    0.24
   3  -9   7    2.79    0.26
   4  -9   8    0.71    0.29
   6  -9   9    0.47    0.28
   7  -9  10    1.66    0.31
  10  -9  13    0.40    0.32
  11  -9  14    2.25    0.34
 -11 -10   9    0.29    0.33
 -10 -10   9    5.07    0.32
  -8 -10   8    0.64    0.28
  -7 -10   8    0.03    0.28
  -5 -10   8   -0.14    0.27
  -4 -10   8    1.48    0.27
  -3 -10   8    0.48    0.28
  -2 -10   8    0.63    0.29
   1 -10   9    0.03    0.28
   2 -10   9    0.69    0.27
   3 -10  10    0.05    0.26
   4 -10  10    0.10    0.27
   5 -10  11    0.19    0.31
   6 -10  12   -0.18    0.33
  -7   9  19    2.75    0.34
  -6   9  19    0.01    0.27
  -5   9  18   -0.11    0.28
  -5   9  19    1.38    0.25
  -4   9  18   -0.21    0.27
  -4   9  19    0.28    0.28
  -3   9  19    0.96    0.29
  -2   9  19   -0.22    0.30
  -1   9  19    0.46    0.31
   0   9  20   -0.16    0.31
   1   9  20    0.10    0.32
 -13   8  17   -0.17    0.29
 -12   8  16    1.44    0.31
 -11   8  15   -0.06    0.31
 -10   8  15    2.85    0.31
  -8   8  14    4.66    0.29
  -7   8  14    0.46    0.27
  -6   8  14    1.70    0.25
  -4   8  14    1.63    0.21
  -3   8  14    0.03    0.25
  -2   8  14    5.54    0.28
  -1   8  14    0.23    0.26
   1   8  15    0.06    0.26
   3   8  16   -0.13    0.28
   4   8  17    0.49    0.28
   5   8  18    0.14    0.28
   6   8  19    0.39    0.29
   7   8  20    0.36    0.29
 -16   7  15    0.20    0.32
 -15   7  14    0.09    0.29
 -14   7  13    0.05    0.32
 -12   7  12   -0.01    0.28
 -10   7  11    0.23    0.26
  -6   7  10   -0.09    0.26
  -5   7  10    6.22    0.28
  -4   7  10    0.28    0.25
  -3   7  10    3.98    0.25
   0   7  11    0.54    0.24
   1   7  11    3.42    0.24
   3   7  12    0.36    0.24
   4   7  13    0.40    0.25
   7   7  15    8.05    0.28
   9   7  18    3.05    0.29
  10   7  19   -0.17    0.29
  11   7  21    0.11    0.33
 -15   6  11    0.23    0.28
 -14   6  10    0.82    0.29
 -12   6   9    8.69    0.29
  -9   6   8    0.39    0.23
   0   6   8    0.60    0.23
   3   6   9    0.66    0.23
   4   6  10   16.26    0.27
   6   6  11    5.75    0.27
   7   6  12    0.06    0.25
   8   6  13    6.56    0.27
   9   6  14    0.44    0.25
  10   6  15    9.51    0.29
  12   6  18    2.63    0.31
  13   6  20    0.41    0.29
  14   6  22    0.29    0.34
 -21   5  14    0.75    0.40
 -16   5   9   -0.03    0.32
 -10   5   6   -0.17    0.24
   1   5   6   44.18    0.42
   3   5   7    3.35    0.24
   5   5   8   12.53    0.29
   8   5  10    0.60    0.24
   9   5  11   18.36    0.32
  10   5  12    0.26    0.23
  11   5  13    3.68    0.27
  13   5  16    3.64    0.29
  14   5  18   -0.10    0.28
  15   5  20    0.97    0.32
 -16   4   7    0.61    0.30
   0   4   4   17.71    0.33
   3   4   5    1.25    0.25
   5   4   6    0.81    0.24
   8   4   8   21.39    0.35
   9   4   9    0.00    0.23
  11   4  11    0.30    0.23
  12   4  12   15.75    0.32
  14   4  15    0.25    0.26
  17   4  21    0.25    0.36
 -23   3  12    0.45    0.51
 -17   3   6    5.73    0.41
 -11   3   3    5.57    0.32
  -6   3   2    0.75    0.24
  -5   3   2    0.88    0.24
  -4   3   2    0.20    0.22
  -3   3   2    7.14    0.29
   4   3   4    0.55    0.25
   6   3   5    1.45    0.25
   9   3   7   19.00    0.38
  10   3   8    0.15    0.23
  11   3   9    2.42    0.24
  12   3  10    0.14    0.24
  15   3  14   13.50    0.38
  16   3  16   -0.16    0.27
  17   3  18    5.43    0.36
  -7   2   1    0.15    0.26
   2   2   2  887.81    2.23
   8   2   5    1.62    0.31
  14   2  11   22.41    0.42
  16   2  14   13.54    0.39
  18   2  18    2.22    0.37
  15   1  11   27.78    0.51
  18   0  15    1.45    0.43
  20   0  20   -0.01    0.44
 -15  -1   2   21.69    0.51
 -13  -1   1    7.58    0.39
 -17  -2   3    0.88    0.29
 -24  -3  10    0.11    0.43
 -18  -3   4   -0.15    0.29
 -15  -3   2   23.97    0.44
 -13  -3   1    8.07    0.29
 -10  -3   0    0.92    0.24
   1  -3   0  177.94    0.91
   9  -3   4   27.66    0.50
 -22  -4   8    0.32    0.33
 -21  -4   7    0.17    0.31
 -20  -4   6    0.23    0.30
 -16  -4   3    1.09    0.25
 -14  -4   2    0.92    0.30
 -12  -4   1    2.62    0.26
  -8  -4   0   11.63    0.31
  -1  -4   0    2.95    0.25
   3  -4   1    0.70    0.24
   5  -4   2    0.98    0.25
 -22  -5   9   -0.06    0.37
 -21  -5   8    0.06    0.35
 -20  -5   7    0.34    0.34
 -19  -5   6    7.90    0.37
 -18  -5   5   -0.15    0.27
 -10  -5   1    0.96    0.24
   1  -5   1   64.86    0.50
  12  -5   8    0.06    0.28
  15  -5  12    4.49    0.38
 -21  -6   9   -0.27    0.34
 -20  -6   8    2.05    0.32
 -19  -6   7   -0.03    0.30
 -15  -6   4   -0.03    0.25
 -13  -6   3    0.40    0.25
 -10  -6   2    6.93    0.28
   1  -6   2    0.99    0.23
   7  -6   5    1.00    0.27
  14  -6  12    1.12    0.34
  16  -6  15    0.39    0.37
  17  -6  17    0.24    0.40
 -17  -7   7    0.31    0.29
 -16  -7   6    0.06    0.29
 -14  -7   5    0.31    0.25
 -12  -7   4   -0.16    0.24
  -9  -7   3   10.55    0.29
  -8  -7   3    2.77    0.24
  -1  -7   3    1.24    0.23
   0  -7   3    0.47    0.24
   3  -7   4   18.54    0.32
   5  -7   5    1.01    0.24
   8  -7   7    0.27    0.24
   9  -7   8   22.49    0.40
  12  -7  11   -0.16    0.31
 -17  -8   9    0.08    0.32
 -16  -8   8   -0.19    0.31
 -15  -8   7   -0.08    0.27
 -13  -8   6    0.26    0.27
 -11  -8   5   -0.08    0.24
 -10  -8   5    0.14    0.28
  -7  -8   4    0.69    0.23
  -6  -8   4    4.85    0.28
  -5  -8   4    0.67    0.25
  -4  -8   4   17.54    0.32
  -3  -8   4    0.04    0.24
   1  -8   5    0.13    0.24
   4  -8   6    1.26    0.25
   7  -8   8    0.30    0.27
   8  -8   9    0.76    0.31
  10  -8  11    0.60    0.33
  11  -8  12   -0.12    0.33
  12  -8  13    3.76    0.32
 -14  -9   9    0.32    0.28
 -13  -9   8    5.98    0.32
 -11  -9   7    0.07    0.26
 -10  -9   7    0.02    0.28
  -7  -9   6    0.11    0.26
  -6  -9   6    0.40    0.26
  -5  -9   6    3.74    0.27
  -4  -9   6    0.59    0.26
  -3  -9   6    1.65    0.28
  -2  -9   6    0.28    0.25
   1  -9   7    0.03    0.26
   3  -9   8    0.24    0.28
   5  -9   9    1.14    0.27
   8  -9  11    0.06    0.29
   9  -9  12    1.03    0.31
  11  -9  15    3.47    0.39
  -9 -10   9   -0.07    0.31
  -8 -10   9    1.61    0.30
   0 -10   9    8.96    0.33
   2 -10  10   13.98    0.34
   4 -10  11    0.31    0.31
   5 -10  12   -0.07    0.32
   7 -10  13   -0.11    0.29
  -8   9  18   -0.03    0.33
  -7   9  18   -0.88    0.34
  -6   9  17   -0.04    0.32
  -6   9  18    0.06    0.27
  -5   9  17    0.43    0.27
  -4   9  17   -0.11    0.27
  -3   9  18   -0.30    0.29
  -2   9  18    0.12    0.30
  -1   9  18    0.03    0.29
   0   9  18    0.09    0.26
   0   9  19    0.11    0.28
   1   9  19    0.02    0.31
   2   9  20   -0.04    0.30
   3   9  20    0.16    0.32
 -13   8  16    0.32    0.32
 -12   8  15    0.77    0.30
 -10   8  14    7.86    0.33
  -9   8  14    0.64    0.26
  -7   8  13    0.61    0.27
  -6   8  13   13.43    0.33
  -5   8  13    0.26    0.26
  -4   8  13    7.20    0.30
  -3   8  13    0.24    0.26
  -2   8  13   10.71    0.30
   0   8  14    0.02    0.26
   1   8  14    0.24    0.25
   2   8  15   -0.25    0.23
   3   8  15   -0.21    0.25
   4   8  16    0.52    0.27
   5   8  17   -0.03    0.28
   6   8  18    0.05    0.28
   7   8  19    0.12    0.29
   8   8  20    0.59    0.33
   8   8  21    0.42    0.29
 -17   7  15    0.28    0.38
 -13   7  12    1.17    0.28
 -11   7  11   15.72    0.35
  -9   7  10    3.70    0.29
  -8   7  10    0.21    0.24
  -7   7  10    0.19    0.22
  -2   7  10    0.31    0.23
  -1   7  10    0.06    0.24
   2   7  11    0.24    0.25
   4   7  12    0.97    0.24
   5   7  13   11.96    0.30
   6   7  14    0.49    0.23
   8   7  16   -0.04    0.25
   9   7  17    0.85    0.28
  10   7  18    0.21    0.25
  11   7  20    5.79    0.34
 -19   6  14   -0.06    0.40
 -18   6  13    0.01    0.35
 -17   6  12    0.10    0.32
 -16   6  11    1.23    0.31
 -13   6   9    0.38    0.29
 -10   6   8   17.59    0.33
  -7   6   7    0.99    0.24
  -6   6   7   23.90    0.35
  -5   6   7    0.16    0.23
  -4   6   7    5.07    0.26
  -3   6   7    1.27    0.25
  -2   6   7   32.95    0.37
   1   6   8    1.42    0.25
   5   6  10   -0.30    0.23
   8   6  12    9.33    0.31
   9   6  13    0.64    0.27
  11   6  16    0.62    0.26
  12   6  17    0.60    0.30
  13   6  19    0.17    0.29
  14   6  21    0.33    0.37
 -15   5   8   10.60    0.37
 -13   5   7    8.19    0.30
 -11   5   6    4.00    0.28
  -7   5   5   31.92    0.39
  -6   5   5    1.04    0.25
  -5   5   5    0.48    0.23
  -4   5   5    0.62    0.24
  -3   5   5   54.92    0.47
  -2   5   5    1.55    0.25
   2   5   6    0.78    0.24
   4   5   7    0.73    0.23
   6   5   8    1.18    0.23
   7   5   9   11.72    0.29
  12   5  14    0.38    0.25
  14   5  17    0.33    0.31
  15   5  19    0.97    0.36
 -13   4   5    0.19    0.28
 -10   4   4   19.44    0.37
   1   4   4    1.23    0.25
   7   4   7    0.70    0.24
  13   4  13    0.08    0.24
  15   4  16    0.24    0.27
  16   4  18    1.27    0.29
  17   4  20    0.02    0.36
  -7   3   2   53.80    0.57
  -2   3   2    0.62    0.24
   2   3   3    1.41    0.25
   8   3   6    1.74    0.30
  13   3  11    4.41    0.28
  18   3  20    0.19    0.35
 -14   2   3    5.87    0.47
  -2   2   1  388.98    1.62
  15   2  12    0.70    0.29
  19   2  20    0.07    0.37
  -5   1   0  127.29    1.63
   8   1   4    0.29    0.27
  17   1  14    3.85    0.37
  18   1  16   -0.12    0.33
 -22   0   8    8.82    0.65
 -20   0   6   20.93    0.72
 -12   0   1    1.00    0.40
  19   0  17    0.04    0.43
 -24  -1  10    0.08    0.44
 -18  -1   4    0.21    0.31
 -10  -1   0    0.35    0.26
   6  -1   2    0.17    0.40
  20  -1  19    0.06    0.55
 -24  -2  10    0.99    0.44
 -18  -2   4    4.98    0.34
 -15  -2   2    1.29    0.31
 -13  -2   1    0.33    0.28
 -10  -2   0   71.35    0.66
 -23  -3   9    4.10    0.39
 -19  -3   5    6.63    0.34
  -9  -3   0    0.69    0.24
  14  -3   9    0.02    0.33
 -17  -4   4    0.09    0.28
 -11  -4   1    1.42    0.25
  -7  -4   0    0.38    0.24
  -6  -4   0  140.32    0.71
  -5  -4   0    1.90    0.25
  -4  -4   0    5.27    0.26
  -3  -4   0    0.71    0.23
  -2  -4   0   24.69    0.37
   2  -4   1   75.01    0.57
  15  -4  11    0.18    0.35
 -16  -5   4    0.32    0.25
 -14  -5   3    0.06    0.24
 -12  -5   2    0.41    0.23
  -9  -5   1   33.25    0.38
  -8  -5   1    0.55    0.23
  -1  -5   1   64.75    0.49
   0  -5   1    0.74    0.23
   3  -5   2    4.94    0.27
   5  -5   3    1.12    0.25
   7  -5   4    8.84    0.29
  18  -5  18    0.04    0.47
 -17  -6   6   -0.25    0.31
 -16  -6   5    3.66    0.29
 -14  -6   4    0.37    0.26
 -12  -6   3    7.48    0.26
  -9  -6   2    0.42    0.23
  -8  -6   2   11.71    0.29
  -1  -6   2    1.12    0.22
   0  -6   2    0.26    0.23
   3  -6   3    0.26    0.23
   5  -6   4    0.21    0.24
   8  -6   6   33.17    0.43
 -19  -7   9    4.45    0.34
 -18  -7   8    0.09    0.30
 -15  -7   6    1.45    0.28
 -13  -7   5    6.08    0.28
 -11  -7   4   16.37    0.32
  -7  -7   3    8.43    0.29
  -6  -7   3    0.30    0.25
  -5  -7   3    4.54    0.26
  -4  -7   3    2.87    0.25
  -3  -7   3   13.75    0.31
  -2  -7   3    0.43    0.24
   2  -7   4    0.32    0.23
   4  -7   5    0.12    0.23
   6  -7   6    1.31    0.23
  10  -7   9    0.47    0.25
  11  -7  10    9.62    0.31
  15  -7  16    0.28    0.35
 -15  -8   8    0.15    0.28
 -14  -8   7    2.00    0.29
 -12  -8   6    2.64    0.29
  -9  -8   5    0.18    0.25
  -8  -8   5    5.84    0.27
  -1  -8   5    0.01    0.24
   0  -8   5    6.21    0.28
   3  -8   6    0.14    0.24
   5  -8   7    0.44    0.25
   6  -8   8    5.67    0.30
   9  -8  10   -0.09    0.28
  13  -8  15    0.10    0.32
 -13  -9   9    1.26    0.30
 -12  -9   8    1.26    0.27
 -11  -9   8    4.91    0.31
  -9  -9   7    9.41    0.32
  -8  -9   7    0.43    0.28
  -7  -9   7    5.13    0.26
  -1  -9   7    0.10    0.25
   0  -9   7   -0.07    0.25
   2  -9   8    0.45    0.27
   4  -9   9    0.78    0.26
   6  -9  10    0.44    0.29
   7  -9  11    1.10    0.28
   8  -9  12   -0.16    0.34
   9  -9  13    1.29    0.36
  10  -9  14    0.02    0.31
 -10 -10  10    0.80    0.33
  -9 -10  10    0.58    0.28
  -7 -10   9    0.48    0.27
  -6 -10   9    0.60    0.29
  -5 -10   9   -0.04    0.29
  -4 -10   9    1.91    0.28
  -3 -10   9    0.42    0.29
  -2 -10   9    0.59    0.26
   0 -10  10    0.07    0.26
   1 -10  10    0.24    0.29
   3 -10  11   -0.27    0.29
   4 -10  12    0.75    0.33
   6 -10  13    1.40    0.32
   7 -10  14    0.01    0.33
  -9   9  17    1.76    0.33
  -8   9  17    0.02    0.33
  -7   9  17    0.27    0.31
  -3   9  17   -0.16    0.26
  -2   9  17   -0.08    0.30
  -1   9  17    1.18    0.31
   0   9  17    0.17    0.26
   1   9  18    0.41    0.30
   2   9  19    0.08    0.27
   3   9  19    0.79    0.29
   4   9  20   -0.25    0.32
 -14   8  16    1.13    0.34
 -13   8  15    0.41    0.33
 -11   8  14    0.30    0.28
  -9   8  13    0.68    0.29
  -8   8  13    7.02    0.29
  -5   8  12    0.20    0.23
  -4   8  12    1.02    0.25
  -1   8  13    0.24    0.23
   0   8  13    5.22    0.29
   2   8  14    6.91    0.28
   4   8  15    0.84    0.27
   5   8  16   -0.06    0.27
   6   8  17    1.10    0.28
   7   8  18   -0.05    0.29
   8   8  19    1.54    0.28
   9   8  21    0.17    0.31
 -16   7  14    0.09    0.32
 -15   7  13    3.30    0.32
 -14   7  12   -0.19    0.30
 -12   7  11    0.14    0.29
 -10   7  10    0.22    0.25
  -6   7   9    0.37    0.23
  -5   7   9   17.02    0.32
  -4   7   9    0.28    0.24
  -3   7   9    1.02    0.25
   0   7  10    0.19    0.23
   1   7  10    0.23    0.24
   3   7  11   20.80    0.33
   5   7  12    7.30    0.26
   6   7  13    1.00    0.25
   7   7  14    2.39    0.27
   8   7  15    0.32    0.26
   9   7  16    1.14    0.28
  10   7  17   -0.08    0.28
  11   7  19    0.72    0.31
  12   7  21   -0.05    0.33
 -15   6  10    0.09    0.31
 -11   6   8    0.15    0.24
  -8   6   7    6.33    0.27
  -1   6   7    0.82    0.24
   2   6   8    1.04    0.24
   4   6   9   13.50    0.29
   6   6  10   10.66    0.28
   7   6  11    0.52    0.25
  10   6  14    5.21    0.27
  11   6  15    0.19    0.25
  13   6  18    0.08    0.28
  14   6  20    3.57    0.33
 -20   5  12    0.02    0.39
 -19   5  11    7.46    0.41
 -18   5  10    0.13    0.34
  -8   5   5    0.78    0.25
  -1   5   5   19.70    0.34
   9   5  10    5.20    0.27
  10   5  11    0.65    0.23
  11   5  12    7.41    0.29
  13   5  15    6.24    0.30
  15   5  18    2.39    0.35
  16   5  21    0.08    0.33
 -21   4  11    0.22    0.40
 -20   4  10    0.95    0.38
 -19   4   9    0.29    0.35
 -18   4   8    1.19    0.34
 -15   4   6   -0.04    0.29
 -11   4   4    0.23    0.28
  -6   4   3   65.46    0.55
  -5   4   3    0.67    0.25
  -4   4   3   31.44    0.42
  -3   4   3    0.59    0.25
   2   4   4   50.36    0.46
   4   4   5   54.40    0.47
   6   4   6   29.71    0.38
   9   4   8    0.72    0.27
  10   4   9   24.57    0.36
  11   4  10    0.32    0.23
  12   4  11   22.89    0.38
  14   4  14    1.15    0.26
  16   4  17    0.87    0.34
 -14   3   4    0.18    0.32
  -8   3   2    0.34    0.22
  -1   3   2   80.08    0.63
   5   3   4    9.53    0.30
  14   3  12    0.34    0.24
  16   3  15    0.04    0.29
  17   3  17    5.69    0.31
  18   3  19   -0.15    0.34
 -16   2   4   23.58    0.80
  -8   2   1   76.75    0.87
  -1   2   1    2.37    0.32
   5   2   3    0.81    0.24
   7   2   4    0.51    0.28
  12   2   8    0.14    0.28
  17   2  15    0.20    0.31
  18   2  17    0.64    0.35
  -4   1   0    2.49    0.43
   2   1   1    0.19    0.26
  16   1  12    0.06    0.31
  19   1  18    9.22    0.43
 -21   0   7    0.37    0.49
 -16   0   3   11.83    0.57
   9   0   4    0.32    0.36
  15   0  10    0.27    0.34
  17   0  13    0.04    0.37
 -23  -1   9    3.05    0.46
 -23  -2   9    0.01    0.41
   1  -2   0    0.62    0.30
 -22  -3   8    0.13    0.36
 -21  -3   7    3.45    0.37
 -20  -3   6    0.17    0.31
 -16  -3   3    1.07    0.29
 -14  -3   2    0.46    0.30
 -12  -3   1    0.69    0.24
  -8  -3   0   -0.14    0.27
   0  -3   0    0.90    0.20
   3  -3   1    1.84    0.29
  10  -3   5    0.20    0.26
  13  -3   8   40.32    0.70
 -23  -4  10    0.08    0.40
 -18  -4   5    1.85    0.29
 -15  -4   3    0.50    0.25
 -13  -4   2    0.13    0.23
 -10  -4   1    9.98    0.33
  19  -4  19    0.17    0.56
 -22  -5  10   -0.13    0.37
 -18  -5   6    0.21    0.31
 -17  -5   5    0.23    0.26
 -11  -5   2    6.80    0.27
  -7  -5   1   25.73    0.36
  -6  -5   1    0.58    0.24
  -5  -5   1   37.84    0.39
  -4  -5   1    0.84    0.23
  -3  -5   1   26.45    0.35
  -2  -5   1    1.67    0.24
   2  -5   2    0.72    0.23
   8  -5   5    0.78    0.23
  14  -5  11    0.29    0.33
  16  -5  14    0.04    0.38
  17  -5  16    1.15    0.38
 -20  -6   9    2.28    0.36
 -19  -6   8    0.13    0.31
 -18  -6   7    0.27    0.29
 -15  -6   5    0.04    0.25
 -13  -6   4    0.81    0.24
 -11  -6   3    0.62    0.24
  -7  -6   2    1.12    0.24
  -6  -6   2   18.41    0.31
  -5  -6   2    1.08    0.24
  -4  -6   2    2.16    0.23
  -3  -6   2    0.37    0.23
  -2  -6   2    5.20    0.25
   2  -6   3    1.73    0.24
   9  -6   7    0.92    0.30
  15  -6  14   -0.03    0.35
  16  -6  16    0.20    0.38
  17  -6  18   -0.02    0.41
 -17  -7   8    2.58    0.30
 -16  -7   7    0.15    0.29
 -14  -7   6    0.15    0.26
 -12  -7   5    0.37    0.24
 -10  -7   4    1.06    0.26
  -9  -7   4    4.16    0.25
   1  -7   4   11.53    0.29
   7  -7   7    0.18    0.22
  13  -7  13    7.15    0.35
 -17  -8  10   -0.17    0.32
 -16  -8   9    1.35    0.32
 -13  -8   7    0.46    0.27
 -11  -8   6    0.43    0.24
 -10  -8   6    2.08    0.27
  -7  -8   5    0.79    0.25
  -6  -8   5   12.95    0.31
  -5  -8   5    0.37    0.25
  -4  -8   5    7.60    0.28
  -3  -8   5    1.08    0.24
  -2  -8   5    0.85    0.24
   1  -8   6    0.09    0.23
   2  -8   6    3.72    0.26
   4  -8   7    5.96    0.28
   7  -8   9    0.05    0.26
   8  -8  10    1.29    0.29
  10  -8  12    1.85    0.33
  11  -8  13    0.13    0.33
  12  -8  14    2.49    0.31
  13  -8  16    0.25    0.36
 -14  -9  10    0.05    0.33
 -12  -9   9   -0.32    0.30
 -10  -9   8    0.04    0.28
  -9  -9   8    0.00    0.25
  -6  -9   7    0.51    0.27
  -5  -9   7   13.55    0.31
  -4  -9   7    1.08    0.25
  -3  -9   7    3.17    0.27
  -2  -9   7   -0.03    0.24
   1  -9   8    1.81    0.28
   3  -9   9   14.49    0.33
   5  -9  10   14.16    0.34
   6  -9  11    0.44    0.30
  10  -9  15    0.30    0.36
 -10 -10  11    0.59    0.32
  -8 -10  10    2.86    0.31
  -7 -10  10    0.50    0.31
  -6 -10  10    2.75    0.30
  -5 -10  10   -0.25    0.26
  -4 -10  10    0.04    0.26
  -3 -10  10    0.40    0.29
  -2 -10  10   14.33    0.36
  -1 -10  10   -0.05    0.29
   1 -10  11   -0.11    0.30
   2 -10  11    2.63    0.29
   3 -10  12    0.19    0.26
   5 -10  13    0.07    0.32
   6 -10  14    2.13    0.32
  -8   9  16    0.00    0.33
  -7   9  16    1.84    0.30
  -6   9  16    0.28    0.27
  -5   9  16    6.22    0.30
  -4   9  16   -0.08    0.27
  -3   9  16    2.39    0.27
  -2   9  16   -0.34    0.31
  -1   9  16   -0.31    0.29
   1   9  17    2.05    0.30
   2   9  18    0.27    0.27
   3   9  18   -0.34    0.31
   4   9  19    0.18    0.30
 -14   8  15    0.24    0.37
 -12   8  14    1.93    0.31
 -11   8  13    0.01    0.30
 -10   8  13    3.72    0.31
  -8   8  12    1.20    0.27
  -7   8  12    0.49    0.25
  -6   8  12    6.52    0.27
  -3   8  12    0.66    0.25
  -2   8  12    0.87    0.26
  -1   8  12    0.45    0.26
   1   8  13    0.15    0.23
   2   8  13   10.71    0.29
   3   8  14   -0.40    0.25
   5   8  15    0.86    0.28
   6   8  16    5.31    0.30
   7   8  17    0.53    0.28
   8   8  18    0.78    0.31
   9   8  20    0.00    0.30
 -17   7  14    0.91    0.37
 -16   7  13    0.11    0.35
 -13   7  11    1.18    0.29
 -11   7  10   10.70    0.33
  -8   7   9    0.86    0.25
  -7   7   9   10.82    0.30
  -2   7   9    1.64    0.23
  -1   7   9   10.38    0.29
   2   7  10    0.83    0.25
   4   7  11    0.96    0.24
   7   7  13    2.22    0.24
   8   7  14    0.34    0.26
   9   7  15    2.11    0.25
  11   7  18    1.16    0.30
  12   7  20    0.06    0.31
 -19   6  13    0.12    0.35
 -18   6  12    2.07    0.35
 -14   6   9    1.01    0.29
 -12   6   8    0.37    0.25
 -10   6   7   11.74    0.33
  -9   6   7    0.90    0.23
   0   6   7    0.44    0.18
   1   6   7    0.61    0.23
   3   6   8    2.17    0.24
   5   6   9   -0.03    0.24
   8   6  11    9.69    0.29
   9   6  12    0.18    0.25
  10   6  13    1.68    0.24
  12   6  16    5.06    0.29
  13   6  17    0.42    0.31
  14   6  19    1.65    0.30
 -21   5  13   -0.04    0.40
 -17   5   9    3.22    0.33
 -14   5   7    0.08    0.24
 -12   5   6    0.44    0.25
  -9   5   5   36.43    0.42
   0   5   5   -0.04    0.17
   1   5   5   20.15    0.32
   3   5   6   13.74    0.25
   5   5   7   25.19    0.30
   7   5   8   12.35    0.30
   8   5   9    0.15    0.24
  12   5  13    0.34    0.25
  13   5  14    4.73    0.31
  14   5  16    0.19    0.27
  16   5  20    0.43    0.31
 -22   4  12    1.05    0.48
 -17   4   7    0.00    0.33
  -8   4   3    2.53    0.30
  -7   4   3    0.88    0.25
  -2   4   3   23.07    0.36
  -1   4   3    0.98    0.24
   8   4   7   16.12    0.33
  13   4  12    0.40    0.24
  15   4  15    0.07    0.26
  17   4  19   -0.06    0.30
 -16   3   5    0.18    0.35
 -12   3   3    0.13    0.28
  -9   3   2   20.62    0.43
   0   3   2    1.32    0.26
   3   3   3   27.48    0.39
   7   3   5   16.80    0.34
  11   3   8    3.94    0.30
  12   3   9    0.37    0.28
  15   3  13    1.84    0.25
 -12   2   2   37.36    0.75
   3   2   2    2.60    0.28
  10   2   6   25.39    0.44
  11   2   7    0.22    0.23
  13   2   9    0.01    0.29
  16   2  13    0.93    0.31
  19   2  19    0.11    0.37
  -6   1   0    0.78    0.39
  -3   1   0   32.62    0.80
  12   1   7    0.12    0.30
  13   1   8    6.73    0.37
  20   1  20    0.08    0.43
  20   0  19    0.18    0.45
 -19  -1   5   17.69    0.52
 -22  -2   8    3.62    0.40
 -21  -2   7    0.18    0.36
 -20  -2   6    3.28    0.36
 -19  -2   5    0.12    0.31
 -16  -2   3   19.93    0.45
 -12  -2   1   13.75    0.37
  -9  -2   0    0.71    0.24
   9  -2   4    0.60    0.31
 -17  -3   4    7.79    0.32
  -7  -3   0   12.79    0.33
  -1  -3   0  177.34    0.89
  11  -3   6    1.24    0.29
  12  -3   7    0.55    0.31
  16  -3  12    0.58    0.42
 -22  -4   9    6.21    0.37
 -21  -4   8   -0.09    0.32
 -20  -4   7    0.14    0.31
 -19  -4   6   -0.10    0.26
 -16  -4   4    7.47    0.34
   1  -4   1    0.93    0.25
   4  -4   2  109.07    0.69
   6  -4   3   64.30    0.57
  14  -4  10   21.78    0.49
 -21  -5   9    2.92    0.35
 -20  -5   8    0.01    0.30
 -19  -5   7    3.08    0.31
 -15  -5   4    4.18    0.27
 -13  -5   3   15.44    0.31
 -10  -5   2    1.83    0.25
   4  -5   3    0.30    0.24
   6  -5   4    1.06    0.24
   9  -5   6    8.29    0.34
  13  -5  10    2.00    0.28
 -16  -6   6    0.61    0.27
 -12  -6   4    6.04    0.28
 -10  -6   3    9.61    0.29
   1  -6   3    0.13    0.23
   4  -6   4    8.84    0.28
   6  -6   5    1.00    0.24
  10  -6   8   17.90    0.36
  11  -6   9    0.10    0.23
  14  -6  13    0.65    0.30
 -19  -7  10    0.65    0.34
 -18  -7   9    0.26    0.31
 -15  -7   7    0.29    0.28
 -13  -7   6    8.46    0.30
 -11  -7   5    0.70    0.24
  -8  -7   4    0.20    0.25
  -7  -7   4    6.32    0.28
  -1  -7   4   11.75    0.29
   0  -7   4    0.16    0.23
   3  -7   5    3.78    0.24
   5  -7   6    9.07    0.27
   8  -7   8    0.69    0.25
   9  -7   9   18.17    0.34
  10  -7  10   -0.14    0.29
  11  -7  11   14.95    0.34
  12  -7  12    0.13    0.27
 -15  -8   9    0.53    0.30
 -14  -8   8    1.50    0.27
 -12  -8   7    8.01    0.32
 -11  -8   7    0.32    0.25
  -9  -8   6    0.69    0.26
  -8  -8   6    5.45    0.26
   0  -8   6    2.43    0.26
   3  -8   7   -0.02    0.24
   5  -8   8    0.60    0.25
   9  -8  11    0.00    0.27
  12  -8  15    0.62    0.35
 -14  -9  11    0.06    0.29
 -13  -9  10    1.19    0.31
 -11  -9   9    1.04    0.30
  -8  -9   8    0.56    0.27
  -7  -9   8    2.17    0.28
  -6  -9   8   -0.13    0.25
  -2  -9   8   -0.29    0.26
  -1  -9   8    1.66    0.26
   0  -9   8    1.01    0.25
   2  -9   9    0.25    0.27
   4  -9  10    1.30    0.27
   7  -9  12    2.04    0.29
   8  -9  13    0.41    0.29
   9  -9  14    0.46    0.33
  -9 -10  11    0.17    0.32
  -8 -10  11    0.32    0.31
  -7 -10  11    0.08    0.28
  -1 -10  11    0.34    0.30
   0 -10  11    0.39    0.28
   2 -10  12    6.07    0.32
   4 -10  13    2.13    0.34
   5 -10  14    0.41    0.32
 -10   9  16    0.42    0.30
  -9   9  16    0.12    0.28
  -8   9  15    0.33    0.27
  -7   9  15    1.65    0.32
  -6   9  15    0.00    0.28
  -5   9  15    0.03    0.29
  -4   9  15   -0.25    0.26
  -3   9  15   -0.24    0.28
  -2   9  15    0.12    0.28
  -1   9  15    0.47    0.28
   0   9  16    0.09    0.21
   1   9  16   -0.16    0.28
   2   9  17    0.24    0.21
   3   9  17    0.40    0.29
   4   9  18    0.18    0.31
   5   9  19   -0.52    0.34
 -13   8  14    0.12    0.32
 -12   8  13    3.70    0.32
 -10   8  12    1.91    0.29
  -9   8  12    0.16    0.28
  -7   8  11    0.15    0.23
  -6   8  11    2.49    0.27
  -5   8  11    0.33    0.26
  -4   8  11    8.09    0.30
  -3   8  11    0.18    0.25
  -2   8  11    0.71    0.23
   0   8  12   14.40    0.27
   1   8  12    0.55    0.25
   3   8  13   -0.10    0.26
   4   8  14    1.23    0.20
   6   8  15    5.15    0.29
   7   8  16   -0.21    0.28
   8   8  17    3.69    0.28
   9   8  19    0.25    0.27
  10   8  20    3.24    0.35
 -15   7  12    0.18    0.30
 -14   7  11   -0.05    0.34
 -12   7  10    0.44    0.28
 -10   7   9    0.25    0.28
  -9   7   9   18.10    0.34
  -5   7   8   15.42    0.30
  -4   7   8    0.71    0.23
   0   7   9   -0.01    0.18
   1   7   9   10.25    0.29
   3   7  10    3.78    0.26
   5   7  11    0.32    0.24
   6   7  12    0.42    0.23
  10   7  16    0.29    0.27
  11   7  17    0.99    0.28
  12   7  19    0.03    0.31
 -17   6  11   -0.11    0.27
 -16   6  10    0.36    0.31
 -13   6   8    0.47    0.30
 -11   6   7    0.09    0.28
  -7   6   6    0.68    0.24
  -6   6   6    6.88    0.27
  -5   6   6    0.32    0.25
  -4   6   6    5.41    0.26
  -3   6   6    1.02    0.24
  -2   6   6    5.01    0.25
   2   6   7   34.08    0.37
   4   6   8   14.05    0.31
   6   6   9    7.21    0.28
   7   6  10    0.86    0.25
  11   6  14    0.23    0.24
  12   6  15    6.49    0.29
  14   6  18    4.75    0.32
  15   6  20    0.40    0.37
 -16   5   8    0.09    0.27
 -13   5   6    8.81    0.33
 -10   5   5    0.38    0.25
  -6   5   4    0.93    0.23
  -5   5   4   28.33    0.38
  -4   5   4    1.36    0.25
  -3   5   4   28.93    0.37
   2   5   5    1.55    0.22
   4   5   6    0.28    0.23
   6   5   7    0.60    0.24
  10   5  10    1.20    0.26
  11   5  11    5.84    0.30
  14   5  15   -0.09    0.32
  15   5  17    0.46    0.29
  16   5  19    0.13    0.31
 -14   4   5   16.16    0.41
 -12   4   4   17.88    0.41
   0   4   3   67.27    0.52
   3   4   4    1.31    0.25
   5   4   5    3.00    0.20
   7   4   6    0.42    0.24
  14   4  13   10.42    0.31
  16   4  16    1.65    0.33
  17   4  18    0.08    0.36
  18   4  21    1.69    0.35
 -21   3   9    0.57    0.52
 -20   3   8    0.16    0.47
   9   3   6   29.20    0.43
  10   3   7    0.33    0.23
  13   3  10   16.04    0.34
  14   3  11    0.30    0.29
  16   3  14    0.19    0.31
  17   3  16    8.84    0.35
  18   3  18    0.22    0.34
  -9   2   1    0.43    0.30
   0   2   1   45.76    0.60
   9   2   5    0.62    0.28
  14   2  10   14.51    0.38
   5   1   2  144.29    1.15
  11   1   6   29.67    0.51
  14   1   9    0.12    0.30
  18   1  15    0.12    0.34
  19   1  17    1.20    0.39
 -14   0   2   13.21    0.56
 -22  -1   8    0.18    0.37
 -21  -1   7    7.55    0.45
 -20  -1   6    0.18    0.34
 -16  -1   3    0.81    0.32
 -12  -1   1    0.21    0.29
  -9  -1   0    3.68    0.32
 -14  -2   2    9.43    0.36
   0  -2   0   80.61    0.76
 -23  -3  10    0.82    0.40
 -11  -3   1   38.03    0.45
  -6  -3   0    0.74    0.24
  -5  -3   0   62.09    0.54
  -4  -3   0    1.43    0.25
  -3  -3   0   24.74    0.39
  -2  -3   0    0.04    0.23
   5  -3   2    0.41    0.22
 -14  -4   3   17.78    0.35
 -12  -4   2    1.87    0.24
  -9  -4   1    0.17    0.24
  -8  -4   1   10.46    0.29
   0  -4   1   33.44    0.41
  13  -4   9    0.03    0.30
  16  -4  13    0.10    0.34
 -16  -5   5    0.07    0.25
 -14  -5   4    0.06    0.23
 -12  -5   3    1.11    0.23
  -9  -5   2   20.11    0.33
   1  -5   2   21.66    0.34
  15  -5  13    0.46    0.33
 -20  -6  10    1.09    0.37
 -19  -6   9    0.29    0.34
 -18  -6   8    0.34    0.29
 -17  -6   7   -0.04    0.27
 -14  -6   5    6.17    0.29
  -9  -6   3    0.43    0.23
  -8  -6   3    2.24    0.25
  -1  -6   3    0.62    0.21
   0  -6   3    3.86    0.25
   3  -6   4    0.49    0.23
   5  -6   5    0.06    0.24
   7  -6   6    0.77    0.24
 -18  -7  10    0.35    0.32
 -17  -7   9    4.78    0.31
 -16  -7   8   -0.01    0.28
 -14  -7   7   -0.02    0.28
 -10  -7   5    0.94    0.25
  -6  -7   4    0.01    0.23
  -5  -7   4   19.79    0.32
  -4  -7   4    1.03    0.25
  -3  -7   4   18.09    0.32
  -2  -7   4    0.18    0.18
   1  -7   5   14.86    0.29
   2  -7   5    0.67    0.22
   4  -7   6    0.15    0.23
   6  -7   7    0.60    0.23
  13  -7  14    2.94    0.34
 -16  -8  10    0.11    0.29
 -14  -8   9    0.28    0.29
 -13  -8   8    0.71    0.25
 -12  -8   8    0.79    0.28
 -10  -8   7    9.40    0.30
  -7  -8   6    0.21    0.25
  -6  -8   6    1.93    0.26
  -5  -8   6   -0.12    0.24
  -4  -8   6    1.37    0.25
  -3  -8   6    0.13    0.25
  -2  -8   6    3.45    0.27
  -1  -8   6   -0.10    0.17
   2  -8   7    0.21    0.25
   4  -8   8   16.72    0.31
   6  -8   9    1.47    0.26
   7  -8  10    0.17    0.26
   8  -8  11    2.64    0.31
  10  -8  13    3.93    0.33
  11  -8  14    0.13    0.30
  13  -8  17    0.28    0.38
 -13  -9  11    0.73    0.31
 -12  -9  10    0.02    0.30
 -11  -9  10   10.64    0.31
 -10  -9   9    0.26    0.26
  -9  -9   9    0.55    0.29
  -5  -9   8    0.06    0.24
  -4  -9   8    1.24    0.24
  -3  -9   8   -0.15    0.19
   0  -9   9    0.94    0.27
   1  -9   9    5.63    0.30
   3  -9  10    0.06    0.26
   5  -9  11    1.05    0.27
   6  -9  12    0.14    0.29
   7  -9  13    0.60    0.31
   8  -9  14    0.11    0.31
   9  -9  15    0.04    0.33
  10  -9  16    0.25    0.32
  -9 -10  12    0.31    0.33
  -8 -10  12    2.05    0.29
  -6 -10  11    1.00    0.26
  -5 -10  11    0.24    0.28
  -4 -10  11    0.63    0.29
  -3 -10  11    0.08    0.29
  -2 -10  11    2.85    0.28
   0 -10  12    0.44    0.29
   1 -10  12    0.18    0.30
   2 -10  13    0.79    0.29
   3 -10  13    0.24    0.30
   4 -10  14    2.68    0.34
 -10   9  15    0.21    0.32
  -9   9  15    0.13    0.32
  -7   9  14    1.97    0.31
  -6   9  14    0.06    0.28
  -5   9  14    4.03    0.32
  -4   9  14    0.39    0.28
  -3   9  14    0.46    0.28
  -2   9  14    0.02    0.27
  -1   9  14    2.26    0.27
   0   9  15    0.14    0.25
   1   9  15    0.01    0.28
   2   9  16   -0.29    0.26
   3   9  16    3.82    0.30
   4   9  17    0.16    0.30
   5   9  18    1.14    0.32
   6   9  19   -0.08    0.32
 -14   8  14   -0.03    0.31
 -13   8  13    0.06    0.36
 -11   8  12    0.11    0.28
  -9   8  11    0.28    0.29
  -8   8  11    3.13    0.27
  -1   8  11    0.72    0.23
   0   8  11    6.95    0.29
   2   8  12    1.68    0.25
   4   8  13    6.98    0.29
   5   8  14    0.31    0.19
   7   8  15    0.56    0.24
   8   8  16    3.25    0.28
   9   8  18    0.09    0.26
  10   8  19    0.02    0.31
 -17   7  13    1.43    0.37
 -13   7  10    1.85    0.32
 -11   7   9    1.46    0.31
  -8   7   8    0.99    0.25
  -7   7   8    3.27    0.25
  -6   7   8    0.29    0.22
  -3   7   8    0.49    0.18
  -2   7   8    0.83    0.24
  -1   7   8   28.39    0.36
   2   7   9    1.21    0.25
   4   7  10    0.70    0.24
   6   7  11    0.84    0.25
   7   7  12    0.90    0.25
   8   7  13   -0.13    0.26
   9   7  14    0.74    0.27
  10   7  15    0.42    0.27
  11   7  16    0.85    0.26
  12   7  18   -0.20    0.31
  13   7  20    0.55    0.35
 -15   6   9    0.11    0.25
  -9   6   6    0.96    0.27
  -8   6   6   32.71    0.39
  -1   6   6    1.27    0.17
   0   6   6    2.35    0.24
   3   6   7    1.38    0.24
   5   6   8    0.84    0.24
   8   6  10   32.32    0.37
   9   6  11   -0.01    0.25
  10   6  12    2.24    0.26
  11   6  13    0.63    0.25
  13   6  16   -0.20    0.28
 -19   5  10    1.36    0.38
 -15   5   7    0.52    0.29
 -11   5   5   25.41    0.41
  -7   5   4    9.08    0.29
  -2   5   4    0.75    0.24
  -1   5   4    1.28    0.24
   5   5   6    1.91    0.22
   8   5   8    0.15    0.25
   9   5   9   57.14    0.47
  12   5  12    0.30    0.25
  13   5  13    1.14    0.31
  15   5  16    3.00    0.31
  16   5  18    0.00    0.34
  17   5  20    6.15    0.41
 -16   4   6    9.03    0.39
  -9   4   3    0.92    0.24
   1   4   3    1.18    0.24
  10   4   8   45.79    0.44
  11   4   9    0.32    0.24
  12   4  10   -0.07    0.25
  13   4  11    0.38    0.26
  15   4  14    0.40    0.25
  18   4  20   -0.03    0.33
 -19   3   7   11.11    0.55
 -10   3   2    0.26    0.28
   1   3   2   78.69    0.61
   4   3   3    0.41    0.23
   6   3   4    1.36    0.25
  15   3  12   16.74    0.38
  19   3  20    2.70    0.40
   6   2   3   20.55    0.42
  15   2  11   -0.16    0.27
  17   2  14    0.56    0.31
  18   2  16    6.24    0.36
  19   2  18    0.34    0.37
 -23   1  10    0.72    0.65
   7   1   3   91.27    0.88
  10   1   5    0.94    0.27
  17   1  13    6.89    0.40
  -8   0   0    5.26    0.50
  16   0  11    7.85    0.47
 -14  -1   2   -0.01    0.31
 -24  -2  11    0.50    0.45
 -17  -2   4   -0.03    0.30
  -8  -2   0  224.18    1.09
 -22  -3   9    0.06    0.35
 -21  -3   8    3.35    0.37
 -19  -3   6    0.81    0.32
 -18  -3   5   -0.13    0.25
 -15  -3   3   11.38    0.33
 -13  -3   2   17.83    0.35
 -10  -3   1    0.57    0.27
   2  -3   1    0.79    0.25
  19  -3  18    5.44    0.70
 -22  -4  10    6.44    0.39
 -18  -4   6    0.58    0.29
 -17  -4   5    0.13    0.25
 -11  -4   2    1.29    0.25
  -7  -4   1    0.88    0.25
  -1  -4   1    1.08    0.25
   3  -4   2    1.02    0.24
   7  -4   4    0.39    0.24
  11  -4   7    0.20    0.28
  12  -4   8   10.41    0.38
  17  -4  15    0.21    0.39
  18  -4  17    1.41    0.46
 -21  -5  10    3.31    0.38
 -20  -5   9    0.00    0.33
 -19  -5   8    2.28    0.35
 -18  -5   7    0.22    0.27
 -17  -5   6    0.20    0.26
 -15  -5   5   10.81    0.34
 -11  -5   3   15.11    0.31
  -8  -5   2    0.55    0.23
  -7  -5   2   24.49    0.35
  -1  -5   2   21.99    0.34
   0  -5   2    0.89    0.17
   3  -5   3    7.04    0.28
   5  -5   4   27.70    0.40
   7  -5   5   31.31    0.40
  18  -5  19    0.11    0.44
 -16  -6   7    0.18    0.29
 -15  -6   6    0.37    0.26
 -13  -6   5    0.34    0.25
 -11  -6   4    1.13    0.23
 -10  -6   4   28.80    0.39
  -7  -6   3    0.22    0.23
  -6  -6   3    1.61    0.23
  -5  -6   3    0.12    0.23
  -4  -6   3    5.79    0.26
  -3  -6   3    0.35    0.22
  -2  -6   3    1.77    0.23
   2  -6   4   12.58    0.30
   8  -6   7    5.40    0.28
   9  -6   8    0.54    0.30
  15  -6  15    0.21    0.32
  16  -6  17    2.72    0.40
 -15  -7   8    1.55    0.29
 -12  -7   6    0.07    0.22
 -11  -7   6    1.23    0.23
  -9  -7   5    5.73    0.27
  -8  -7   5   -0.17    0.25
   0  -7   5   -0.08    0.23
   3  -7   6   15.51    0.31
   5  -7   7   11.73    0.29
   7  -7   8    3.37    0.24
   8  -7   9    0.71    0.25
   9  -7  10    3.71    0.31
  11  -7  12    2.86    0.31
  12  -7  13    0.22    0.27
 -16  -8  11    5.36    0.34
 -15  -8  10    0.42    0.30
 -13  -8   9    0.43    0.28
 -11  -8   8    0.29    0.28
  -9  -8   7    0.68    0.26
  -8  -8   7    7.71    0.29
   0  -8   7    3.37    0.27
   1  -8   7    0.00    0.23
   3  -8   8    1.24    0.25
   5  -8   9    0.40    0.25
   9  -8  12    0.17    0.27
  12  -8  16    1.59    0.33
 -12  -9  11    0.01    0.29
 -10  -9  10   -0.03    0.29
  -8  -9   9    0.11    0.20
  -7  -9   9    1.05    0.29
  -6  -9   9    0.68    0.26
  -5  -9   9    1.01    0.26
  -4  -9   9    0.64    0.28
  -3  -9   9   15.54    0.32
  -2  -9   9    0.25    0.27
  -1  -9   9    6.00    0.27
   1  -9  10    2.32    0.25
   2  -9  10    0.11    0.27
   4  -9  11    0.61    0.27
   5  -9  12    9.87    0.31
  -7 -10  12    0.05    0.30
  -6 -10  12    0.81    0.30
  -5 -10  12    0.25    0.30
  -4 -10  12    0.70    0.30
  -3 -10  12    0.49    0.29
  -2 -10  12    5.45    0.33
  -1 -10  12    0.20    0.27
   1 -10  13    0.27    0.29
   3 -10  14    0.42    0.30
   4 -10  15    2.14    0.34
   5 -10  15    0.42    0.29
 -11   9  15    3.42    0.34
  -9   9  14    0.71    0.32
  -8   9  14    0.24    0.30
  -6   9  13    0.19    0.28
  -5   9  13    2.82    0.29
  -4   9  13    0.31    0.28
  -3   9  13    2.45    0.28
  -2   9  13    0.71    0.28
   0   9  14   -0.29    0.28
   1   9  14    2.39    0.29
   2   9  15    0.03    0.29
   3   9  15    0.45    0.26
   4   9  16    0.22    0.28
   5   9  17    0.44    0.29
   6   9  18    0.05    0.31
   7   9  19    2.29    0.34
 -15   8  14    0.14    0.37
 -14   8  13    0.27    0.36
 -12   8  12    1.06    0.30
 -10   8  11    0.49    0.28
  -7   8  10    0.31    0.25
  -6   8  10    1.46    0.26
  -5   8  10    0.05    0.25
  -4   8  10    3.56    0.27
  -3   8  10    1.49    0.25
  -2   8  10    7.84    0.29
  -1   8  10    1.35    0.23
[truncated: 822,472 more chars]
